# Supplementary material
Source: Research Square preprint supplement (doi:10.21203/rs.3.rs-9362542/v1)
Supplement: Supplementary file 1 [file 83da62cde79a4b2ae5d4e63c.xlsx]

## Sheet: C-vs-T12.filter.annot
id	C_mean	T12_mean	log2(fc)	PValue	FDR	Symbol	Description
ENSAPLG00020016376	2.568	3296.05	10.3259	1.7966e-202	2.69e-198	CCL4	XP_027301799.1 C-C motif chemokine 4-like [Anas platyrhynchos]
ENSAPLG00020012247	6.95967	1054.29	7.24303	2.98e-156	2.23e-152	NOS2	XP_027327526.2 nitric oxide synthase, inducible isoform X1 [Anas platyrhynchos]
ENSAPLG00020004970	5.779	632.455	6.774	1.59e-116	7.93e-113	RSAD2	NP_001297730.1 radical S-adenosyl methionine domain-containing protein 2 precursor [Anas platyrhynchos]
ENSAPLG00020007956	7.381	669.031	6.50211	4.06e-101	1.52e-97	CTSG	XP_012954946.2 mast cell protease 1A [Anas platyrhynchos]
ENSAPLG00020013433	105.07	3561.22	5.08295	2.31e-98	6.92e-95	IFIT5	XP_027316266.1 LOW QUALITY PROTEIN: interferon-induced protein with tetratricopeptide repeats 5 [Anas platyrhynchos]
ENSAPLG00020001026	72.8017	1463.18	4.32899	1.19e-75	2.97e-72	MX	NP_001297338.1 interferon-induced GTP-binding protein Mx [Anas platyrhynchos]
ENSAPLG00020000757	7.311	144.557	4.30543	4.52e-67	9.67e-64	DDX60	XP_038034270.1 probable ATP-dependent RNA helicase DDX60 isoform X2 [Anas platyrhynchos]
ENSAPLG00020005012	2.06367	236.285	6.83917	6.52e-64	1.22e-60	CMPK2	XP_005018632.2 UMP-CMP kinase 2, mitochondrial [Anas platyrhynchos]
ENSAPLG00020004292	0.423	142.795	8.39907	2.03e-61	3.39e-58	NKX6-1	XP_038034760.1 homeobox protein Nkx-6.1-like isoform X1 [Anas platyrhynchos]
ENSAPLG00020013051	28.9903	461.507	3.99271	4.1e-61	6.15e-58	Helz2	XP_038022027.1 LOW QUALITY PROTEIN: helicase with zinc finger domain 2 [Anas platyrhynchos]
ENSAPLG00020009946	197.08	2.08167	-6.5649	5e-60	6.81e-57	HPGD	XP_005027515.1 15-hydroxyprostaglandin dehydrogenase [NAD(+)] [Anas platyrhynchos]
ENSAPLG00020016387	928.539	19375.6	4.38313	5.97e-60	7.45e-57	CCL4	XP_038021537.1 C-C motif chemokine 4 homolog isoform X1 [Anas platyrhynchos]
ENSAPLG00020011541	0.954667	42.843	5.48792	1.32e-59	1.52e-56	KIT	XP_038034614.1 mast/stem cell growth factor receptor Kit isoform X1 [Anas platyrhynchos]
ENSAPLG00020001374	2.38	88.3953	5.21494	6.71e-57	7.18e-54	Blk	XP_005030656.1 tyrosine-protein kinase Blk isoform X1 [Anas platyrhynchos]
ENSAPLG00020008241	1.76033	117.241	6.05749	1.69e-54	1.69e-51	DUSP5	XP_032047195.1 dual specificity protein phosphatase 5 [Aythya fuligula]
ENSAPLG00020010387	0.807	54.623	6.0808	1.06e-53	9.95e-51	Irf4	XP_038031219.1 LOW QUALITY PROTEIN: interferon regulatory factor 4 [Anas platyrhynchos]
ENSAPLG00020002644	2.612	109.119	5.3846	5.01e-53	4.41e-50	MMP1	XP_005010575.1 interstitial collagenase [Anas platyrhynchos]
MSTRG.20008	7.01133	206.984	4.88368	3.74e-50	3.11e-47	LAMP3	XP_005024729.2 taxid=8839 lysosome-associated membrane glycoprotein 3 [Anas platyrhynchos]
ENSAPLG00020006302	2.344	202.577	6.43335	1.05e-47	8.25e-45	IQCJ-SCHIP1	XP_005027639.2 schwannomin-interacting protein 1 isoform X8 [Anas platyrhynchos]
ENSAPLG00020016374	308.459	5571.11	4.17481	2.66e-47	1.99e-44	Ccl5	NP_001297326.1 C-C motif chemokine 26 precursor [Anas platyrhynchos]
ENSAPLG00020013437	6.45467	181.103	4.81032	3.46e-47	2.47e-44	ch25h	XP_005029482.1 cholesterol 25-hydroxylase [Anas platyrhynchos]
ENSAPLG00020010446	0.700667	50.4	6.16855	7.82e-47	5.33e-44	GATA2	NP_001003797.1 GATA-binding factor 2 isoform 2 [Gallus gallus]
MSTRG.7329	7.269	207.781	4.83717	7.17e-46	4.67e-43	--	XP_032055888.1 taxid=219594 uncharacterized protein LOC116496733 isoform X2 [Aythya fuligula]
ENSAPLG00020017913	870.746	73.7557	-3.56143	8.2e-46	5.12e-43	--	KAF1474629.1 Endogenous retrovirus group K member 8 Gag polyprotein, partial [Pygoscelis antarcticus]
ENSAPLG00020017792	3.19133	68.1283	4.41602	2.57e-45	1.54e-42	Kcnk1	XP_027308792.1 potassium channel subfamily K member 1 [Anas platyrhynchos]
ENSAPLG00020010056	13.2187	197.314	3.89985	8.4e-45	4.84e-42	Eif2ak2	XP_027309704.2 interferon-induced, double-stranded RNA-activated protein kinase isoform X6 [Anas platyrhynchos]
ENSAPLG00020006342	27.1323	298.212	3.45825	9.09e-45	5.04e-42	IRF1	EOA93465.1 Interferon regulatory factor 1, partial [Anas platyrhynchos]
ENSAPLG00020016438	42.621	1219.63	4.83873	7.9e-44	4.23e-41	CCL14	EOB04010.1 C-C motif chemokine 13 [Anas platyrhynchos]
ENSAPLG00020016440	343.079	5116.26	3.89848	1.5e-42	7.76e-40	CCL3	XP_005010712.3 C-C motif chemokine 3 [Anas platyrhynchos]
ENSAPLG00020001706	40.577	563.842	3.79656	2.03e-42	1.01e-39	Mitd1	XP_005013490.3 MIT domain-containing protein 1 isoform X1 [Anas platyrhynchos]
ENSAPLG00020013873	24.4067	584.362	4.58152	1.07e-41	5.17e-39	USP18	XP_005009988.2 ubl carboxyl-terminal hydrolase 18 isoform X1 [Anas platyrhynchos]
ENSAPLG00020011209	39.08	353.276	3.17629	4.97e-41	2.33e-38	SAMD9L	XP_005010984.3 sterile alpha motif domain-containing protein 9 [Anas platyrhynchos]
MSTRG.5313	3.283	82.963	4.65938	6.96e-41	3.16e-38	--	-
ENSAPLG00020016171	8.90667	133.093	3.90141	8.95e-41	3.94e-38	PML	XP_038040928.1 LOW QUALITY PROTEIN: protein PML [Anas platyrhynchos]
ENSAPLG00020008429	0.432667	555.122	10.3253	4.02e-40	1.72e-37	IFNK	ANQ45216.1 IFN-kappa [Anas platyrhynchos]
ENSAPLG00020014965	0.565333	52.046	6.52454	5.16e-40	2.15e-37	IL12RB1	XP_035203908.1 interleukin-12 receptor subunit beta-1 isoform X1 [Oxyura jamaicensis]
ENSAPLG00020016707	0.930333	31.8937	5.09938	8.55e-40	3.46e-37	F8	XP_027321330.2 LOW QUALITY PROTEIN: coagulation factor VIII [Anas platyrhynchos]
ENSAPLG00020005495	0.415667	28.451	6.09691	5.94e-39	2.34e-36	EXOC3L2	XP_012958497.3 uncharacterized protein LOC101792387 isoform X1 [Anas platyrhynchos]
ENSAPLG00020002212	14.7	138.557	3.23659	1e-38	3.86e-36	C1S	XP_038026806.1 complement C1s subcomponent isoform X2 [Anas platyrhynchos]
ENSAPLG00020016275	0.373	22.578	5.9196	3.09e-38	1.16e-35	EPHA2	XP_038022621.1 ephrin type-A receptor 2 isoform X4 [Anas platyrhynchos]
ENSAPLG00020011691	5.80333	175.02	4.9145	3.77e-38	1.38e-35	MARCKSL1	XP_032058316.1 MARCKS-related protein [Aythya fuligula]
ENSAPLG00020001474	1.594	25.2273	3.98426	5.3e-38	1.89e-35	Atp10a	XP_038029111.1 probable phospholipid-transporting ATPase VA isoform X1 [Anas platyrhynchos]
ENSAPLG00020017444	6.825	107.105	3.97205	1.46e-37	5.07e-35	GCH1	XP_027315086.2 LOW QUALITY PROTEIN: GTP cyclohydrolase 1 [Anas platyrhynchos]
ENSAPLG00020015873	11.193	168.563	3.91262	7.6e-37	2.59e-34	IL17REL	XP_038029117.1 putative interleukin-17 receptor E-like isoform X2 [Anas platyrhynchos]
ENSAPLG00020002085	121.333	1704.26	3.8121	8.21e-37	2.73e-34	SDC4	XP_005023944.1 syndecan-4 [Anas platyrhynchos]
ENSAPLG00020008828	0.680333	356.364	9.03289	2.32e-36	7.55e-34	--	EOA95585.1 hypothetical protein Anapl_12933, partial [Anas platyrhynchos]
MSTRG.10479	1.667	83.3037	5.64305	2.16e-35	6.88e-33	Tnfrsf9	XP_027299216.2 taxid=8839 tumor necrosis factor receptor superfamily member 9 [Anas platyrhynchos]
ENSAPLG00020009920	24.0643	0.453333	-5.73018	3.87e-35	1.21e-32	SH3TC1	XP_005016255.3 SH3 domain and tetratricopeptide repeat-containing protein 1 isoform X4 [Anas platyrhynchos]
ENSAPLG00020014357	49.4607	423.588	3.09831	5.33e-35	1.63e-32	rasgef1a	XP_027315819.1 ras-GEF domain-containing family member 1A isoform X3 [Anas platyrhynchos]
ENSAPLG00020000083	100.6	654.318	2.70136	8.57e-35	2.54e-32	Epsti1	XP_038029022.1 epithelial-stromal interaction protein 1 isoform X2 [Anas platyrhynchos]
ENSAPLG00020018215	8.499	290.298	5.0941	8.65e-35	2.54e-32	hsp30c	XP_038024781.1 LOW QUALITY PROTEIN: heat shock protein 30C-like [Anas platyrhynchos]
ENSAPLG00020015795	62.0343	2032.74	5.03421	9.5e-35	2.74e-32	Oasl2	XP_038041887.1 LOW QUALITY PROTEIN: 2'-5'-oligoadenylate synthase-like protein 2 [Anas platyrhynchos]
ENSAPLG00020011749	32.128	376.207	3.54962	3.72e-34	1.05e-31	RILPL2	XP_027326033.1 RILP-like protein 2 isoform X1 [Anas platyrhynchos]
ENSAPLG00020017970	30.2797	187.328	2.62915	6.04e-34	1.68e-31	IFIH1	NP_001297740.1 interferon-induced helicase C domain-containing protein 1 [Anas platyrhynchos]
ENSAPLG00020013825	0.428333	22.249	5.69886	9.05e-34	2.47e-31	TBC1D4	XP_038040658.1 LOW QUALITY PROTEIN: TBC1 domain family member 4 [Anas platyrhynchos]
ENSAPLG00020012051	15.7107	136.02	3.11401	1.81e-33	4.85e-31	TRANK1	XP_038030496.1 TPR and ankyrin repeat-containing protein 1 isoform X4 [Anas platyrhynchos]
ENSAPLG00020001481	0.364667	142.769	8.61289	5.65e-33	1.48e-30	IL6	XP_027306726.1 interleukin-6 [Anas platyrhynchos]
;GO:2000145//regulation of cell motility;GO:2000147//positive regulation of cell motility;GO:2000377//regulation of reactive oxygen species metabolic process;GO:2000379//positive regulation of reactive oxygen species metabolic process;GO:2000514//regulation of CD4-positive, alpha-beta T cell activation;GO:2000516//positive regulation of CD4-positive, alpha-beta T cell activation;GO:2000551//regul…
ENSAPLG00020016162	3.02333	58.763	4.2807	8.75e-33	2.26e-30	PML	XP_038040926.1 protein PML isoform X6 [Anas platyrhynchos]
ENSAPLG00020015265	27.9677	536.492	4.26173	1.01e-32	2.57e-30	--	XP_005025829.2 endonuclease domain-containing 1 protein [Anas platyrhynchos]
ENSAPLG00020016596	18.8273	133.606	2.82708	1.09e-32	2.72e-30	Aspg	XP_005030045.2 60 kDa lysophospholipase isoform X1 [Anas platyrhynchos]
ENSAPLG00020018194	56.3953	361.458	2.68018	1.21e-32	2.96e-30	CNP	XP_027301001.1 2',3'-cyclic-nucleotide 3'-phosphodiesterase isoform X1 [Anas platyrhynchos]
ENSAPLG00020005846	2.357	101.982	5.43522	2.96e-32	7.14e-30	HTR1B	XP_005017926.3 5-hydroxytryptamine receptor 1B [Anas platyrhynchos]
ENSAPLG00020006819	1.129	74.8277	6.05045	3.58e-32	8.5e-30	CCN2	XP_027310310.1 CCN family member 2 [Anas platyrhynchos]
ENSAPLG00020002500	26.261	211.365	3.00874	3.96e-32	9.27e-30	Sema4d	XP_038026072.1 semaphorin-4D isoform X1 [Anas platyrhynchos]
ENSAPLG00020002204	2.718	49.091	4.17484	4.44e-32	1.02e-29	Stc1	XP_026718815.1 stanniocalcin-1 [Athene cunicularia]
ENSAPLG00020007967	0.567667	27.567	5.60175	7.92e-32	1.8e-29	Gzmg	XP_005019579.2 granzyme G [Anas platyrhynchos]
MSTRG.7230	8.366	152.541	4.18852	1.27e-31	2.84e-29	--	KAI6075684.1 taxid=8832 hypothetical protein LUU34_00273700 [Aix galericulata]
ENSAPLG00020010623	87.7263	1392.45	3.98847	3.03e-31	6.67e-29	--	XP_005018366.1 L-amino-acid oxidase [Anas platyrhynchos]
ENSAPLG00020001775	103.517	9.88333	-3.38873	5.91e-31	1.28e-28	TSPAN13	XP_027306700.1 tetraspanin-13 [Anas platyrhynchos]
ENSAPLG00020011417	1.58167	96.3893	5.92936	6.08e-31	1.3e-28	IL10	AEP93921.1 interleukin-10 isoform 1 [Anas platyrhynchos]
ENSAPLG00020018208	22.7873	299.83	3.71784	8.53e-31	1.8e-28	DHX58	XP_038024806.1 LOW QUALITY PROTEIN: probable ATP-dependent RNA helicase DHX58 [Anas platyrhynchos]
ENSAPLG00020008610	113.943	13.488	-3.07856	9.57e-31	1.99e-28	BTN1A1	XP_038043746.1 butyrophilin subfamily 1 member A1-like isoform X2 [Anas platyrhynchos]
ENSAPLG00020009564	38.7767	211.681	2.44863	1.72e-30	3.54e-28	DDX58	XP_038025643.1 antiviral innate immune response receptor RIG-I isoform X1 [Anas platyrhynchos]
ENSAPLG00020017691	0.966333	45.172	5.54676	2.18e-30	4.42e-28	HDC	XP_012961841.3 histidine decarboxylase [Anas platyrhynchos]
ENSAPLG00020011897	110.805	1020.66	3.20341	3.22e-30	6.43e-28	Gimap1	XP_038030419.1 GTPase IMAP family member 1-like [Anas platyrhynchos]
ENSAPLG00020000277	1.22	43.5687	5.15834	3.36e-30	6.62e-28	slc25a30	XP_005026269.1 kidney mitochondrial carrier protein 1 isoform X1 [Anas platyrhynchos]
ENSAPLG00020002310	41.5353	672.678	4.01751	3.98e-30	7.73e-28	--	XP_005018366.1 L-amino-acid oxidase [Anas platyrhynchos]
ENSAPLG00020004735	5.07633	86.2033	4.08588	5.53e-30	1.06e-27	IL1RN	XP_035170306.1 interleukin-36 receptor antagonist protein-like isoform X1 [Oxyura jamaicensis]
ENSAPLG00020012506	6.99867	85.3417	3.6081	7.41e-30	1.4e-27	P2RX7	XP_005028243.1 P2X purinoceptor 7 [Anas platyrhynchos]
ENSAPLG00020018285	0.736667	1494.51	10.9864	7.68e-30	1.44e-27	IFN	NP_001297756.2 interferon-like precursor [Anas platyrhynchos]
ENSAPLG00020014497	0.124333	78.1723	9.2963	7.86e-30	1.45e-27	ATP5F1A	XP_027303553.1 ATP synthase subunit alpha, mitochondrial [Anas platyrhynchos]
ENSAPLG00020004010	4.52	112.637	4.63921	1.64e-29	3e-27	F10	XP_005022007.2 coagulation factor X [Anas platyrhynchos]
ENSAPLG00020017677	33.506	336.798	3.32939	1.69e-29	3.04e-27	IRF3	AID76935.1 interferon regulatory factor 7 [Anas platyrhynchos]
MSTRG.2294	0.494	10.3233	4.38525	2.76e-29	4.92e-27	--	XP_040422583.1 taxid=8869 translation initiation factor IF-2-like [Cygnus olor]
ENSAPLG00020005063	271.346	35.557	-2.93193	4.07e-29	7.18e-27	CDH2	XP_027307987.1 cadherin-2 [Anas platyrhynchos]
ENSAPLG00020010587	14.8227	141.49	3.25483	4.24e-29	7.38e-27	TRIM27	XP_032061084.1 zinc finger protein RFP-like [Aythya fuligula]
ENSAPLG00020011279	7.586	114.495	3.91581	1.98e-28	3.41e-26	SOCS1	XP_027324753.1 suppressor of cytokine signaling 1 [Anas platyrhynchos]
ENSAPLG00020008000	10.6647	143.12	3.74631	5.37e-28	9.14e-26	GPR160	XP_005019654.2 probable G-protein coupled receptor 160 [Anas platyrhynchos]
MSTRG.20426	282.622	25.6293	-3.46301	4.81e-27	8.1e-25	env	XP_038041111.1 taxid=8839 uncharacterized protein LOC119718063 [Anas platyrhynchos]
ENSAPLG00020012298	5.47	64.7263	3.56474	6.1e-27	1.01e-24	SLBP	XP_027311503.1 uncharacterized protein LOC101791777 [Anas platyrhynchos]
ENSAPLG00020006996	1.08633	27.431	4.65827	6.95e-27	1.14e-24	CCN1	XP_027318988.1 CCN family member 1 [Anas platyrhynchos]
ENSAPLG00020015388	30.8023	218.656	2.82755	1.32e-26	2.16e-24	--	XP_005008925.1 uncharacterized protein LOC101802072 [Anas platyrhynchos]
ENSAPLG00020015339	0.216333	38.8597	7.48887	1.43e-26	2.3e-24	--	XP_038025883.1 dynactin-associated protein [Anas platyrhynchos]
ENSAPLG00020003163	11.7283	98.9587	3.07683	1.79e-26	2.86e-24	ACKR2	XP_038031463.1 atypical chemokine receptor 2 isoform X1 [Anas platyrhynchos]
ENSAPLG00020005855	72.268	376.413	2.38089	1.91e-26	3.01e-24	NFKBIZ	XP_027305324.2 NF-kappa-B inhibitor zeta isoform X1 [Anas platyrhynchos]
ENSAPLG00020017994	0.744	75.3183	6.66155	1.93e-26	3.01e-24	TIMP3	XP_005011572.1 metalloproteinase inhibitor 3 [Anas platyrhynchos]
ENSAPLG00020013967	4.18933	62.954	3.90951	8.66e-26	1.34e-23	FMNL3	XP_035426258.1 formin-like protein 3 [Cygnus atratus]
MSTRG.1798	0.236333	7.66833	5.02002	1.14e-25	1.74e-23	--	KAK4821027.1 taxid=33587 hypothetical protein QYF61_012113 [Mycteria americana]
ENSAPLG00020012790	0.760333	19.4387	4.67615	1.56e-25	2.36e-23	ZC3H12D	XP_005008947.5 probable ribonuclease ZC3H12D [Anas platyrhynchos]
ENSAPLG00020011843	81.4907	11.722	-2.79742	1.67e-25	2.5e-23	Pkn2	XP_038020962.1 serine/threonine-protein kinase N3 isoform X1 [Anas platyrhynchos]
MSTRG.20465	117.187	10.6267	-3.46305	2.06e-25	3.05e-23	gag-pro-pol	XP_032062684.1 taxid=219594 uncharacterized protein LOC116501274 [Aythya fuligula]
MSTRG.7277	1.05133	32.9197	4.96866	3.21e-25	4.71e-23	--	EOB06655.1 taxid=8839 hypothetical protein Anapl_03159 [Anas platyrhynchos]
ENSAPLG00020009045	0.420333	25.3157	5.91235	4.72e-25	6.86e-23	LIF	XP_038043492.1 leukemia inhibitory factor isoform X1 [Anas platyrhynchos]
ENSAPLG00020018243	116.327	17.9463	-2.69642	5.63e-25	8.12e-23	ATP6V0A1	XP_027301089.1 V-type proton ATPase 116 kDa subunit a1 isoform X3 [Anas platyrhynchos]
MSTRG.18292	0.482333	18.4063	5.25403	5.78e-25	8.24e-23	KALRN	XP_035392640.1 taxid=8868 kalirin isoform X2 [Cygnus atratus]
ENSAPLG00020013021	66.0907	402.055	2.60487	9.82e-25	1.39e-22	TNFAIP3	EOB02639.1 Tumor necrosis factor, alpha-induced protein 3, partial [Anas platyrhynchos]
ENSAPLG00020008855	56.885	741.954	3.70521	1.21e-24	1.69e-22	AVD	XP_027302638.1 avidin-like [Anas platyrhynchos]
ENSAPLG00020002379	3.06333	48.0127	3.97024	1.45e-24	2.02e-22	GRAP2	XP_027306768.2 GRB2-related adapter protein 2 isoform X1 [Anas platyrhynchos]
ENSAPLG00020018134	2.20733	43.6037	4.30407	1.53e-24	2.11e-22	CCR7	ACB46528.1 CC chemokine receptor 7 [Anas platyrhynchos]
ENSAPLG00020014738	29.3063	262.994	3.16575	1.87e-24	2.55e-22	--	XP_032062987.1 intercellular adhesion molecule 5 [Aythya fuligula]
ENSAPLG00020009021	124.6	14.293	-3.12393	1.96e-24	2.64e-22	Chst5	XP_032051388.1 carbohydrate sulfotransferase 5-like [Aythya fuligula]
ENSAPLG00020001710	28.83	192.297	2.73769	2.05e-24	2.74e-22	Mrpl30	XP_032063926.1 39S ribosomal protein L30, mitochondrial [Aythya fuligula]
ENSAPLG00020018078	0.370333	163.338	8.78482	2.11e-24	2.79e-22	--	XP_038024590.1 granulocyte colony-stimulating factor isoform X3 [Anas platyrhynchos]
ENSAPLG00020015294	10.5943	110.239	3.37927	2.3e-24	3.02e-22	GBP2	XP_038028610.1 guanylate-binding protein 2-like [Anas platyrhynchos]
MSTRG.92	22.87	114.606	2.32515	2.38e-24	3.1e-22	FBH1	XP_038029132.1 taxid=8839 LOW QUALITY PROTEIN: F-box DNA helicase 1 [Anas platyrhynchos]
ENSAPLG00020007313	0.516667	24.7597	5.58261	2.48e-24	3.2e-22	IL36RN	XP_040394233.1 uncharacterized protein LOC121060464 [Cygnus olor]
ENSAPLG00020005198	69.949	7.808	-3.16328	2.67e-24	3.42e-22	WASF3	XP_027325318.2 wiskott-Aldrich syndrome protein family member 3 isoform X2 [Anas platyrhynchos]
ENSAPLG00020008934	1369.71	261.894	-2.38682	2.8e-24	3.56e-22	HEXB	XP_038025769.1 beta-hexosaminidase subunit beta [Anas platyrhynchos]
ENSAPLG00020008208	0.0923333	11.0973	6.90915	4.42e-24	5.56e-22	Unc13a	XP_042650550.1 protein unc-13 homolog A isoform X13 [Tyto alba]
ENSAPLG00020007031	6.787	66.7483	3.29789	6.76e-24	8.44e-22	IRF4	XP_032054459.1 interferon regulatory factor 4-like [Aythya fuligula]
ENSAPLG00020014631	14.5747	141.055	3.27472	6.89e-24	8.53e-22	UBC13	XP_038036333.1 ubiquitin/ISG15-conjugating enzyme E2 L6 isoform X2 [Anas platyrhynchos]
ENSAPLG00020003318	57.8033	335.318	2.5363	1.04e-23	1.28e-21	gatd3a	XP_013054520.1 PREDICTED: ES1 protein homolog, mitochondrial-like [Anser cygnoides domesticus]
ENSAPLG00020011243	67.4293	8.33733	-3.01572	1.46e-23	1.78e-21	ARHGAP20	XP_040400013.1 rho GTPase-activating protein 20 isoform X1 [Cygnus olor]
ENSAPLG00020014304	0.593	18.1523	4.93598	1.57e-23	1.89e-21	KCNMA1	XP_015143645.1 calcium-activated potassium channel subunit alpha-1 isoform X17 [Gallus gallus]
ENSAPLG00020007391	0.0756667	49.1073	9.34206	1.58e-23	1.89e-21	NEUROD1	XP_032046455.1 neurogenic differentiation factor 1 [Aythya fuligula]
ENSAPLG00020001421	1.49867	42.8273	4.83678	1.73e-23	2.06e-21	DUSP4	XP_027311681.2 LOW QUALITY PROTEIN: dual specificity protein phosphatase 4 [Anas platyrhynchos]
MSTRG.6297	0.826667	19.6863	4.57374	1.9e-23	2.24e-21	--	-
ENSAPLG00020010053	51.1233	316.319	2.62932	1.97e-23	2.3e-21	Eif2ak2	XP_027309699.2 interferon-induced, double-stranded RNA-activated protein kinase isoform X1 [Anas platyrhynchos]
MSTRG.12381	113.18	1353.87	3.5804	2.07e-23	2.4e-21	--	XP_038025194.1 taxid=8839 uncharacterized protein LOC119714237 [Anas platyrhynchos]
ENSAPLG00020000420	0.455	17.6197	5.27518	2.67e-23	3.08e-21	ARHGEF5	XP_027305735.2 rho guanine nucleotide exchange factor 5 [Anas platyrhynchos]
ENSAPLG00020007766	3.25833	47.4567	3.8644	2.73e-23	3.12e-21	TFPI2	XP_027328588.2 WAP four-disulfide core domain protein 3-like [Anas platyrhynchos]
ENSAPLG00020012047	84.7253	400.504	2.24095	2.96e-23	3.36e-21	CD83	EOA98250.1 CD83 antigen [Anas platyrhynchos]
ENSAPLG00020017489	7.907	58.1727	2.87914	3.01e-23	3.39e-21	Mknk1	XP_005027427.2 MAP kinase-interacting serine/threonine-protein kinase 1 isoform X1 [Anas platyrhynchos]
ENSAPLG00020008559	54.2013	6.885	-2.9768	6.49e-23	7.26e-21	SLC16A10	XP_032040786.1 monocarboxylate transporter 10 [Aythya fuligula]
ENSAPLG00020001331	137.226	20.246	-2.76085	6.76e-23	7.5e-21	HERC2	XP_027302670.2 E3 ubiquitin-protein ligase HERC2 isoform X1 [Anas platyrhynchos]
ENSAPLG00020016166	9.45933	113.355	3.58297	1.05e-22	1.16e-20	STOML1	XP_021129266.2 stomatin-like protein 1 isoform X1 [Anas platyrhynchos]
MSTRG.20466	168.489	16.0327	-3.39357	1.39e-22	1.52e-20	env	XP_038041111.1 taxid=8839 uncharacterized protein LOC119718063 [Anas platyrhynchos]
MSTRG.10450	4.87533	57.812	3.5678	1.72e-22	1.87e-20	Arhgef7	XP_013049720.1 taxid=8845 uncharacterized protein LOC106044313 isoform X1 [Anser cygnoides]
ENSAPLG00020005884	3.52233	41.9007	3.57237	1.74e-22	1.88e-20	MLLT6	XP_038024641.1 protein AF-17 isoform X1 [Anas platyrhynchos]
ENSAPLG00020007506	30.9353	251.832	3.02514	1.82e-22	1.95e-20	TNFRSF18	XP_005008864.1 tumor necrosis factor receptor superfamily member 18 isoform X2 [Anas platyrhynchos]
ENSAPLG00020013952	0.185	7.302	5.30269	1.84e-22	1.96e-20	Mtcl1	XP_027307837.2 microtubule cross-linking factor 1 isoform X3 [Anas platyrhynchos]
ENSAPLG00020009361	16.1427	234.81	3.86254	2.12e-22	2.24e-20	MYO1C	XP_027327907.1 unconventional myosin-Ic isoform X1 [Anas platyrhynchos]
ENSAPLG00020013036	82.8097	636.9	2.9432	2.64e-22	2.77e-20	TNFRSF6B	XP_027328873.2 tumor necrosis factor receptor superfamily member 6B isoform X2 [Anas platyrhynchos]
ENSAPLG00020017229	0.254333	13.318	5.71051	6.62e-22	6.88e-20	SLC6A4	XP_005023199.3 sodium-dependent serotonin transporter [Anas platyrhynchos]
ENSAPLG00020001859	1.00533	77.4333	6.26721	7.88e-22	8.14e-20	IFITM3	NP_001297752.1 interferon-induced transmembrane protein 1 [Anas platyrhynchos]
ENSAPLG00020007916	119.846	18.6663	-2.68267	1.2e-21	1.23e-19	SH3GL2	XP_032061798.1 endophilin-A1 [Aythya fuligula]
ENSAPLG00020015073	28.742	1.94067	-3.88854	1.29e-21	1.32e-19	KBP	NP_001297319.1 probable glutamate receptor precursor [Anas platyrhynchos]
ENSAPLG00020004486	24.0237	209.042	3.12126	1.61e-21	1.62e-19	--	XP_027316548.2 serglycin [Anas platyrhynchos]
ENSAPLG00020014109	1.325	26.2427	4.30785	2.05e-21	2.06e-19	FRMD4B	XP_027323245.2 FERM domain-containing protein 4B isoform X1 [Anas platyrhynchos]
ENSAPLG00020000340	32.7197	161.234	2.30092	2.06e-21	2.06e-19	OTUD4	XP_038033978.1 OTU domain-containing protein 4 isoform X3 [Anas platyrhynchos]
ENSAPLG00020008491	24.0003	2.17367	-3.46485	2.08e-21	2.06e-19	PTPN14	XP_005014774.1 tyrosine-protein phosphatase non-receptor type 14 [Anas platyrhynchos]
ENSAPLG00020016938	79.951	414.286	2.37344	2.56e-21	2.52e-19	Dram2	XP_038024113.1 DNA damage-regulated autophagy modulator protein 2 [Anas platyrhynchos]
ENSAPLG00020001580	1.3	17.8273	3.77751	3.18e-21	3.12e-19	SEMA3C	XP_005016762.1 semaphorin-3C [Anas platyrhynchos]
ENSAPLG00020012290	12.172	94.3993	2.95521	3.81e-21	3.68e-19	GPR82	XP_005012542.3 probable G-protein coupled receptor 82 [Anas platyrhynchos]
ENSAPLG00020002126	1.639	26.4457	4.01214	3.81e-21	3.68e-19	HNRNPK	XP_032062879.1 heterogeneous nuclear ribonucleoprotein K-like isoform X9 [Aythya fuligula]
ENSAPLG00020000387	119.11	9.45267	-3.65543	5.54e-21	5.29e-19	MRC1	XP_038030179.1 macrophage mannose receptor 1 isoform X1 [Anas platyrhynchos]
ENSAPLG00020000370	0.365333	15.3497	5.39285	5.54e-21	5.29e-19	SERPINB12	XP_013056565.1 PREDICTED: LOW QUALITY PROTEIN: serpin B11-like, partial [Anser cygnoides domesticus]
ENSAPLG00020014727	79.7273	384.448	2.26964	6.68e-21	6.33e-19	--	EOA94307.1 Intercellular adhesion molecule 1 [Anas platyrhynchos]
ENSAPLG00020000481	24.8833	2.38133	-3.38534	7.35e-21	6.93e-19	Cacnb2	XP_027306465.1 voltage-dependent L-type calcium channel subunit beta-2 isoform X2 [Anas platyrhynchos]
ENSAPLG00020001855	400.223	3548.97	3.14852	7.42e-21	6.95e-19	Ifitm3	XP_027313423.1 dispanin subfamily A member 2b [Anas platyrhynchos]
ENSAPLG00020000626	2.19767	25.516	3.53736	7.68e-21	7.14e-19	Mrgprd	XP_027315216.1 proto-oncogene Mas-like [Anas platyrhynchos]
ENSAPLG00020016068	1.792	33.3753	4.21914	7.87e-21	7.28e-19	ST8SIA6	XP_027306486.2 alpha-2,8-sialyltransferase 8F isoform X1 [Anas platyrhynchos]
ENSAPLG00020003495	0.639667	12.6937	4.31064	9.6e-21	8.82e-19	Hspa12a	EOB06742.1 Heat shock 70 kDa protein 12B, partial [Anas platyrhynchos]
ENSAPLG00020017776	20.6733	109.145	2.4004	9.83e-21	8.98e-19	BCL2A1	XP_005027205.1 bcl-2-related protein A1 [Anas platyrhynchos]
ENSAPLG00020000963	0.782	17.8357	4.51145	1.13e-20	1.02e-18	Ank3	XP_032047268.1 ankyrin-3 isoform X19 [Aythya fuligula]
MSTRG.14723	9.96733	62.3953	2.64616	1.15e-20	1.04e-18	STAT2	QCY58619.1 taxid=8839 signal transducer and activator of transcription 2 [Anas platyrhynchos]
ENSAPLG00020015016	2.74433	34.11	3.63567	1.49e-20	1.34e-18	ZAP70	XP_005029244.1 tyrosine-protein kinase ZAP-70 [Anas platyrhynchos]
ENSAPLG00020011995	1.81933	39	4.42199	1.57e-20	1.4e-18	BATF	EOB05474.1 Basic leucine zipper transcriptional factor ATF-like, partial [Anas platyrhynchos]
ENSAPLG00020002583	14.7947	92.2937	2.64115	2.14e-20	1.9e-18	SINHCAF	XP_013028492.1 PREDICTED: protein FAM60A [Anser cygnoides domesticus]
ENSAPLG00020001232	20.174	130.582	2.69438	2.31e-20	2.04e-18	TRIM13	EOB04545.1 Tripartite motif-containing protein 13, partial [Anas platyrhynchos]
ENSAPLG00020012963	0.230667	8.95767	5.27924	2.41e-20	2.11e-18	DSE	XP_038032553.1 dermatan-sulfate epimerase isoform X1 [Anas platyrhynchos]
ENSAPLG00020015267	7.762	165.23	4.4119	2.44e-20	2.12e-18	--	NP_001297745.1 interleukin-2 receptor subunit alpha-like precursor [Anas platyrhynchos]
ENSAPLG00020002775	281.2	1457.15	2.37349	2.71e-20	2.34e-18	ITA	EOB07956.1 Inhibitor of apoptosis protein, partial [Anas platyrhynchos]
MSTRG.10848	0.231	14.5207	5.97407	3.01e-20	2.59e-18	ERV3-1	XP_029897243.1 taxid=223781 ubiquinone biosynthesis monooxygenase COQ6, mitochondrial isoform X2 [Aquila chrysaetos chrysaetos]
ENSAPLG00020004238	80.835	397.502	2.29791	3.49e-20	2.98e-18	RPA1	XP_027327916.2 replication protein A 70 kDa DNA-binding subunit [Anas platyrhynchos]
ENSAPLG00020003514	6.288	69.0593	3.45716	4.01e-20	3.41e-18	SPRY1	XP_005015614.2 protein sprouty homolog 1 [Anas platyrhynchos]
ENSAPLG00020003087	33.1337	236.933	2.83811	4.16e-20	3.52e-18	CST7	XP_005017192.3 cystatin-F [Anas platyrhynchos]
ENSAPLG00020006753	57.9703	8.11633	-2.83641	4.98e-20	4.19e-18	Sgpp1	XP_032044062.1 sphingosine-1-phosphate phosphatase 1 [Aythya fuligula]
ENSAPLG00020003596	0.419667	12.3777	4.88235	5.34e-20	4.47e-18	TESPA1	XP_038028496.1 protein TESPA1 isoform X2 [Anas platyrhynchos]
ENSAPLG00020010289	46.0417	298.736	2.69786	5.44e-20	4.53e-18	ACOT7	XP_027299210.2 cytosolic acyl coenzyme A thioester hydrolase [Anas platyrhynchos]
ENSAPLG00020002744	9.47133	51.4467	2.44144	6.06e-20	5.02e-18	MAMLD1	XP_005020545.2 mastermind-like domain-containing protein 1 isoform X1 [Anas platyrhynchos]
ENSAPLG00020013048	3.561	45.8417	3.68631	6.71e-20	5.52e-18	HELZ2	EOA95357.1 Peroxisomal proliferator-activated receptor A-interacting complex 285 kDa protein, partial [Anas platyrhynchos]
ENSAPLG00020008135	2.894	63.8783	4.46419	8.24e-20	6.74e-18	CCL15	XP_005030978.1 C-C motif chemokine 22 [Anas platyrhynchos]
ENSAPLG00020008862	24.3313	126.327	2.37627	1.11e-19	9e-18	Nr4a3	XP_027307663.1 LOW QUALITY PROTEIN: nuclear receptor subfamily 4 group A member 3 [Anas platyrhynchos]
ENSAPLG00020004665	0.333667	9.46833	4.82663	1.13e-19	9.17e-18	RAB26	XP_005509151.1 ras-related protein Rab-26 isoform X2 [Columba livia]
ENSAPLG00020014048	0.242333	24.894	6.68266	1.37e-19	1.1e-17	APOBEC1	XP_027305667.1 C->U-editing enzyme APOBEC-1 isoform X1 [Anas platyrhynchos]
ENSAPLG00020017344	1.20367	12.2813	3.35096	1.44e-19	1.15e-17	NID2	XP_032043724.1 nidogen-2 isoform X5 [Aythya fuligula]
ENSAPLG00020015308	0.607333	26.361	5.43977	1.45e-19	1.15e-17	JAML	XP_027299969.2 junctional adhesion molecule-like isoform X1 [Anas platyrhynchos]
ENSAPLG00020006820	53.1177	6.18833	-3.10157	1.59e-19	1.26e-17	Lama3	XP_027307737.2 LOW QUALITY PROTEIN: laminin subunit alpha-3 [Anas platyrhynchos]
ENSAPLG00020008951	16.0423	80.175	2.32127	1.81e-19	1.43e-17	Tpm3	XP_030368555.1 tropomyosin beta chain isoform X3 [Strigops habroptila]
ENSAPLG00020008372	0.467	11.377	4.60655	1.99e-19	1.56e-17	CARMIL1	XP_032038825.1 F-actin-uncapping protein LRRC16A isoform X1 [Aythya fuligula]
MSTRG.15865	10.9467	0.748	-3.87131	2.12e-19	1.65e-17	--	-
ENSAPLG00020011102	312.938	71.835	-2.12312	2.71e-19	2.09e-17	SLC23A2	XP_032060108.1 solute carrier family 23 member 2 [Aythya fuligula]
ENSAPLG00020006857	181.494	35.2663	-2.36356	2.71e-19	2.09e-17	PPFIBP1	XP_027305828.1 liprin-beta-1 isoform X2 [Anas platyrhynchos]
ENSAPLG00020017295	1.79167	33.1397	4.20918	3.08e-19	2.37e-17	Tcf7	XP_038042170.1 transcription factor 7 isoform X1 [Anas platyrhynchos]
ENSAPLG00020000454	68.075	11.9407	-2.51124	4.14e-19	3.16e-17	Abcc1	EOA93802.1 Multidrug resistance-associated protein 1, partial [Anas platyrhynchos]
MSTRG.7117	12.316	127.918	3.37661	4.17e-19	3.17e-17	--	XP_038021504.1 taxid=8839 uncharacterized protein LOC101791571 isoform X1 [Anas platyrhynchos]
ENSAPLG00020014587	6.12867	36.132	2.55963	4.62e-19	3.5e-17	Vcp	XP_027304168.1 transitional endoplasmic reticulum ATPase [Anas platyrhynchos]
ENSAPLG00020015565	78.1627	7.79367	-3.32611	5.86e-19	4.41e-17	UCHL1	XP_032042433.1 ubiquitin carboxyl-terminal hydrolase isozyme L1 [Aythya fuligula]
ENSAPLG00020015830	53.6817	8.946	-2.58511	6.15e-19	4.61e-17	C9orf72	XP_027302204.2 guanine nucleotide exchange C9orf72 homolog isoform X1 [Anas platyrhynchos]
MSTRG.13307	0.555667	13.6057	4.61384	6.46e-19	4.82e-17	--	XP_032040349.1 taxid=219594 signal transducer CD24 [Aythya fuligula]
ENSAPLG00020007012	1.003	24.7887	4.62729	6.65e-19	4.93e-17	TP53I11	XP_038035345.1 tumor protein p53-inducible protein 11 [Anas platyrhynchos]
ENSAPLG00020002260	5.995	38.3137	2.67603	7.62e-19	5.62e-17	Slc25a37	XP_038022926.1 LOW QUALITY PROTEIN: mitoferrin-1 [Anas platyrhynchos]
MSTRG.4962	5.91167	28.4817	2.2684	7.69e-19	5.65e-17	CMTR2	XP_027321826.1 taxid=8839 cap-specific mRNA (nucleoside-2'-O-)-methyltransferase 2 [Anas platyrhynchos]
ENSAPLG00020015477	9.93267	63.9087	2.68576	8.77e-19	6.41e-17	F3	XP_027318151.1 tissue factor [Anas platyrhynchos]
ENSAPLG00020000059	0.51	6.88467	3.75482	9.42e-19	6.85e-17	Gvin1	XP_032039457.1 interferon-induced very large GTPase 1-like [Aythya fuligula]
ENSAPLG00020015884	9.79933	56.141	2.5183	1.13e-18	8.2e-17	PI4K2B	EOB01586.1 Phosphatidylinositol 4-kinase type 2-beta, partial [Anas platyrhynchos]
ENSAPLG00020010760	6.449	69.4003	3.4278	1.15e-18	8.32e-17	Bcl2l15	XP_005011784.1 bcl-2-like protein 15 [Anas platyrhynchos]
ENSAPLG00020018289	0.519	1958.78	11.8819	1.2e-18	8.55e-17	IFN	XP_038025742.1 interferon [Anas platyrhynchos]
ENSAPLG00020018290	0.519	1958.78	11.8819	1.2e-18	8.55e-17	IFN	XP_038025742.1 interferon [Anas platyrhynchos]
MSTRG.5336	1.41133	21.4713	3.92728	1.21e-18	8.61e-17	--	-
ENSAPLG00020002718	0.488667	11.139	4.51063	1.26e-18	8.91e-17	CDHR3	XP_021131021.3 LOW QUALITY PROTEIN: cadherin-related family member 3 [Anas platyrhynchos]
ENSAPLG00020010185	58.1313	10.9243	-2.41177	1.27e-18	8.92e-17	loxl3b	XP_038034469.1 lysyl oxidase homolog 3 isoform X5 [Anas platyrhynchos]
MSTRG.1831	4.83167	0.153	-4.98092	1.38e-18	9.69e-17	--	XP_038031956.1 taxid=8839 inositol 1,4,5-trisphosphate receptor-interacting protein-like 1 [Anas platyrhynchos]
ENSAPLG00020017707	120.716	24.386	-2.3075	1.45e-18	1.01e-16	TM6SF1	XP_027321867.2 transmembrane 6 superfamily member 1 isoform X1 [Anas platyrhynchos]
ENSAPLG00020008529	0.882667	25.3577	4.84441	1.47e-18	1.02e-16	F2R	XP_038027409.1 proteinase-activated receptor 1 [Anas platyrhynchos]
ENSAPLG00020010580	0.159	13.8247	6.44207	1.47e-18	1.02e-16	CD163	XP_038028666.1 LOW QUALITY PROTEIN: scavenger receptor cysteine-rich type 1 protein M130-like [Anas platyrhynchos]
ENSAPLG00020000786	1.96433	20.4653	3.38107	1.53e-18	1.05e-16	Ubash3a	EOA93670.1 Ubiquitin associated and SH3 domain-containing protein A, partial [Anas platyrhynchos]
ENSAPLG00020011067	11.612	1544.69	7.05556	1.86e-18	1.27e-16	CXCL8	XP_013046073.1 PREDICTED: LOW QUALITY PROTEIN: interleukin-8-like [Anser cygnoides domesticus]
MSTRG.4479	1.34267	20.494	3.93203	1.95e-18	1.33e-16	--	-
ENSAPLG00020001072	70.5907	346.669	2.29601	2.19e-18	1.48e-16	PARP9	XP_038037856.1 protein mono-ADP-ribosyltransferase PARP9 isoform X2 [Anas platyrhynchos]
ENSAPLG00020012409	2.091	21.0837	3.33386	2.32e-18	1.57e-16	CAMK1G	EOB03064.1 Calcium/calmodulin-dependent protein kinase type 1G, partial [Anas platyrhynchos]
ENSAPLG00020001987	17.9183	1.39333	-3.68482	2.5e-18	1.68e-16	RYR3	XP_027314648.1 ryanodine receptor 3 isoform X17 [Anas platyrhynchos]
ENSAPLG00020005015	5.08	40.0187	2.97777	2.63e-18	1.76e-16	gjc1	XP_032046235.1 gap junction gamma-1 protein-like [Aythya fuligula]
ENSAPLG00020005170	32.7	330.456	3.3371	3.81e-18	2.54e-16	CD1D	XP_005009885.2 T-cell surface glycoprotein CD1b-3 [Anas platyrhynchos]
ENSAPLG00020003777	0.883333	19.35	4.45323	6.14e-18	4.07e-16	Adamts13	XP_005013323.1 A disintegrin and metalloproteinase with thrombospondin motifs 13 isoform X3 [Anas platyrhynchos]
ENSAPLG00020003174	0.191333	10.645	5.79794	7.16e-18	4.73e-16	EPB41L4A	XP_038026672.1 band 4.1-like protein 4A isoform X1 [Anas platyrhynchos]
MSTRG.1818	12.9943	0.970667	-3.74276	7.4e-18	4.86e-16	--	KAK4817902.1 taxid=33587 LOW QUALITY PROTEIN: hypothetical protein QYF61_002385 [Mycteria americana]
ENSAPLG00020004259	6.752	39.4517	2.5467	7.94e-18	5.2e-16	ETV7	XP_013055808.1 PREDICTED: transcription factor ETV7 isoform X1 [Anser cygnoides domesticus]
ENSAPLG00020000221	9.20567	106.504	3.53225	8.84e-18	5.76e-16	MFAP3L	XP_038034950.1 microfibrillar-associated protein 3-like isoform X1 [Anas platyrhynchos]
ENSAPLG00020003079	198.361	47.4293	-2.06427	1.08e-17	7.01e-16	SELENON	XP_038023084.1 selenoprotein N isoform X1 [Anas platyrhynchos]
ENSAPLG00020003024	88.6133	449.689	2.34333	1.15e-17	7.43e-16	GBP1	XP_040399658.1 guanylate-binding protein 1-like isoform X2 [Cygnus olor]
ENSAPLG00020014388	8.22533	66.2587	3.00996	1.17e-17	7.53e-16	GALNT6	XP_027301260.1 polypeptide N-acetylgalactosaminyltransferase 6 [Anas platyrhynchos]
ENSAPLG00020014848	278.017	1068.01	1.94168	1.19e-17	7.63e-16	STAT1	QCY58620.1 signal transducer and activator of transcription 1 [Anas platyrhynchos]
ENSAPLG00020008066	75.5047	17.2833	-2.12718	1.22e-17	7.81e-16	Atp8b2	XP_005019480.2 phospholipid-transporting ATPase ID [Anas platyrhynchos]
ENSAPLG00020002259	166.414	590.466	1.82708	1.26e-17	7.98e-16	MFSD14B	XP_038026481.1 hippocampus abundant transcript-like protein 1 [Anas platyrhynchos]
ENSAPLG00020001675	0.541667	93.2127	7.42698	1.59e-17	1.01e-15	TFPI	XP_038037811.1 tissue factor pathway inhibitor isoform X1 [Anas platyrhynchos]
ENSAPLG00020010725	2.328	0.0516667	-5.49371	1.76e-17	1.11e-15	Ttn	XP_038038006.1 titin isoform X6 [Anas platyrhynchos]
ENSAPLG00020017943	0.530333	10.7213	4.33744	1.89e-17	1.19e-15	KIAA1211L	XP_027321066.2 acrosomal protein KIAA1210 homolog isoform X3 [Anas platyrhynchos]
ENSAPLG00020008387	274.926	975.549	1.82717	2.15e-17	1.34e-15	MMP9	XP_038022066.1 matrix metalloproteinase-9 [Anas platyrhynchos]
ENSAPLG00020002101	0.001	38.2883	15.2246	2.26e-17	1.41e-15	RPL37	XP_027304095.1 60S ribosomal protein L37 isoform X2 [Anas platyrhynchos]
ENSAPLG00020013610	30.1697	125.503	2.05655	2.31e-17	1.43e-15	NFKB2	XP_038037097.1 nuclear factor NF-kappa-B p100 subunit isoform X3 [Anas platyrhynchos]
ENSAPLG00020016934	56.178	212.925	1.92227	2.67e-17	1.65e-15	CEPT1	XP_005026861.1 choline/ethanolaminephosphotransferase 1 isoform X1 [Anas platyrhynchos]
ENSAPLG00020004552	0.799667	11.4693	3.84224	2.85e-17	1.75e-15	Arhgap24	XP_038033916.1 rho GTPase-activating protein 24 isoform X1 [Anas platyrhynchos]
ENSAPLG00020012938	192.5	49.36	-1.96345	2.89e-17	1.77e-15	FBXO30	XP_021129408.1 F-box only protein 30 isoform X1 [Anas platyrhynchos]
ENSAPLG00020014250	54.0947	11.1607	-2.27706	3.1e-17	1.89e-15	ATP10D	XP_005028161.3 probable phospholipid-transporting ATPase VD isoform X1 [Anas platyrhynchos]
ENSAPLG00020006600	137.335	30.6417	-2.16413	3.4e-17	2.06e-15	Slc38a6	XP_038036037.1 probable sodium-coupled neutral amino acid transporter 6 [Anas platyrhynchos]
MSTRG.9759	14.3423	71.863	2.32497	3.57e-17	2.16e-15	nbeal2	XP_038030044.1 taxid=8839 LOW QUALITY PROTEIN: neurobeachin-like protein 2 [Anas platyrhynchos]
ENSAPLG00020007492	2.10167	29.9127	3.83115	4.22e-17	2.54e-15	--	XP_012957727.2 tumor necrosis factor receptor superfamily member 4 isoform X1 [Anas platyrhynchos]
ENSAPLG00020000865	27.9917	162.546	2.53778	4.31e-17	2.58e-15	L3MBTL2	XP_038024433.1 lethal(3)malignant brain tumor-like protein 2 isoform X1 [Anas platyrhynchos]
ENSAPLG00020005982	5.18233	68.942	3.73371	4.41e-17	2.63e-15	--	XP_005016889.1 inducible T-cell costimulator [Anas platyrhynchos]
ENSAPLG00020012898	5.36767	39.188	2.86804	4.85e-17	2.88e-15	THBD	XP_038031863.1 LOW QUALITY PROTEIN: thrombomodulin [Anas platyrhynchos]
ENSAPLG00020016268	0.162333	8.80033	5.76053	5.35e-17	3.17e-15	Fblim1	XP_035423836.1 filamin-binding LIM protein 1 isoform X2 [Cygnus atratus]
ENSAPLG00020016474	1.62167	19.6683	3.60033	5.42e-17	3.2e-15	SLFN13	XP_012963096.3 schlafen family member 13 [Anas platyrhynchos]
ENSAPLG00020009833	0.524	23.038	5.4583	5.68e-17	3.33e-15	Ccr4	XP_021124531.1 C-C chemokine receptor type 4 isoform X1 [Anas platyrhynchos]
ENSAPLG00020005897	12.8133	80.9453	2.6593	5.69e-17	3.33e-15	Traf3	XP_005020759.1 TNF receptor-associated factor 3 isoform X1 [Anas platyrhynchos]
ENSAPLG00020003715	138.319	21.139	-2.71002	6.46e-17	3.76e-15	ADAP1	XP_027324695.1 arf-GAP with dual PH domain-containing protein 1 [Anas platyrhynchos]
MSTRG.15346	0.81	21.8363	4.75266	6.48e-17	3.76e-15	--	XP_040398540.1 taxid=8869 uncharacterized protein LOC121062564 [Cygnus olor]
ENSAPLG00020014491	0.001	5.89867	12.5262	6.52e-17	3.77e-15	NIPBL	XP_038025372.1 nipped-B-like protein isoform X1 [Anas platyrhynchos]
ENSAPLG00020007632	2.46733	602.794	7.93257	7.5e-17	4.32e-15	--	XP_038026964.1 eotaxin-like [Anas platyrhynchos]
ENSAPLG00020017223	113.689	25.8817	-2.13509	9.15e-17	5.25e-15	TESK2	XP_032047893.1 dual specificity testis-specific protein kinase 2 [Aythya fuligula]
ENSAPLG00020014256	5.84267	35.9917	2.62296	9.33e-17	5.33e-15	MCTP2	XP_027321846.2 multiple C2 and transmembrane domain-containing protein 2 isoform X1 [Anas platyrhynchos]
ENSAPLG00020017603	7.04167	52.2667	2.8919	9.93e-17	5.65e-15	fam162b	XP_005031235.1 protein FAM162B [Anas platyrhynchos]
ENSAPLG00020015122	0.545667	8.14	3.89894	9.98e-17	5.66e-15	TMCC2	XP_038024233.1 transmembrane and coiled-coil domains protein 2 isoform X4 [Anas platyrhynchos]
ENSAPLG00020017544	0.569333	11.418	4.32589	1.15e-16	6.52e-15	Lef1	XP_027312419.1 lymphoid enhancer-binding factor 1 isoform X1 [Anas platyrhynchos]
ENSAPLG00020017111	34.2177	279.76	3.03138	1.18e-16	6.66e-15	IL1B	XP_038022794.1 interleukin-1 beta-like isoform X1 [Anas platyrhynchos]
other organism;GO:0098609//cell-cell adhesion;GO:0098771//inorganic ion homeostasis;GO:0099177//regulation of trans-synaptic signaling;GO:0104004//cellular response to environmental stimulus;GO:1900076//regulation of cellular response to insulin stimulus;GO:1900077//negative regulation of cellular response to insulin stimulus;GO:1900744//regulation of p38MAPK cascade;GO:1900745//positive regulati…
MSTRG.14460	0.247	7.76067	4.9736	1.2e-16	6.73e-15	--	EOB01807.1 taxid=8839 hypothetical protein Anapl_01565 [Anas platyrhynchos]
ENSAPLG00020014798	59.0123	6.674	-3.14439	1.28e-16	7.13e-15	CMTM8	XP_035174444.1 CKLF-like MARVEL transmembrane domain-containing protein 8 [Oxyura jamaicensis]
ENSAPLG00020014762	7.78867	0.597	-3.70557	1.53e-16	8.5e-15	COL19A1	XP_005009779.3 collagen alpha-1(XIX) chain isoform X1 [Anas platyrhynchos]
ENSAPLG00020001614	86.1083	19.0437	-2.17684	1.61e-16	8.91e-15	CD36	XP_038039630.1 LOW QUALITY PROTEIN: platelet glycoprotein 4 [Anas platyrhynchos]
MSTRG.7330	1.615	160.277	6.63289	1.64e-16	9.06e-15	--	XP_038021223.1 taxid=8839 uncharacterized protein LOC106016586 [Anas platyrhynchos]
MSTRG.18456	55.8793	261.802	2.22809	1.68e-16	9.27e-15	NMI	XP_032045964.1 taxid=219594 N-myc-interactor [Aythya fuligula]
ENSAPLG00020006507	55.6217	12.5537	-2.14754	1.8e-16	9.89e-15	TTLL12	XP_027305846.1 tubulin--tyrosine ligase-like protein 12 isoform X1 [Anas platyrhynchos]
ENSAPLG00020004173	17.9113	71.8077	2.00327	1.81e-16	9.89e-15	SETX	XP_038020995.1 probable helicase senataxin isoform X1 [Anas platyrhynchos]
ENSAPLG00020012101	6.217	44.726	2.84682	2.01e-16	1.1e-14	MEIS1	XP_005042963.1 PREDICTED: homeobox protein Meis1 isoform X2 [Ficedula albicollis]
ENSAPLG00020010726	0.482667	12.299	4.67137	2.09e-16	1.13e-14	Tox2	XP_038022196.1 TOX high mobility group box family member 2 isoform X1 [Anas platyrhynchos]
ENSAPLG00020003799	48.0217	198.684	2.04872	2.25e-16	1.22e-14	IP6K2	XP_027323323.1 inositol hexakisphosphate kinase 2 [Anas platyrhynchos]
ENSAPLG00020006815	86.953	18.434	-2.23787	2.37e-16	1.28e-14	HS2ST1	XP_027318440.1 heparan sulfate 2-O-sulfotransferase 1 [Anas platyrhynchos]
ENSAPLG00020002670	0.191667	13.4793	6.13601	2.46e-16	1.32e-14	Fam3d	EOA96114.1 Protein FAM3D, partial [Anas platyrhynchos]
ENSAPLG00020004419	7.68433	106.704	3.79555	2.95e-16	1.58e-14	GPX2	XP_040416225.1 glutathione peroxidase 2 [Cygnus olor]
ENSAPLG00020010843	0.388333	9.25567	4.57497	3.11e-16	1.66e-14	SPINZ	NP_989964.1 spindlin-Z [Gallus gallus]
ENSAPLG00020012569	4.53033	39.8783	3.13792	3.18e-16	1.69e-14	EBI3	XP_038024986.1 interleukin-27 subunit beta [Anas platyrhynchos]
ENSAPLG00020003067	0.664667	15.7613	4.56761	3.54e-16	1.87e-14	Ighm	AAA68605.1 IgM heavy chain, constant region domains one, two, three and four, partial [Anas platyrhynchos]
MSTRG.4033	0.689667	15.0247	4.44529	3.63e-16	1.92e-14	--	-
ENSAPLG00020002394	1.89533	25.647	3.75827	4.07e-16	2.14e-14	--	XP_038040386.1 transforming growth factor beta activator LRRC32-like [Anas platyrhynchos]
ENSAPLG00020015305	16.5087	138.265	3.06614	5.13e-16	2.69e-14	CD3E	XP_038023383.1 T-cell surface glycoprotein CD3 epsilon chain isoform X1 [Anas platyrhynchos]
ENSAPLG00020013807	72.1007	13.6847	-2.39745	5.32e-16	2.78e-14	ttyh3	XP_032053458.1 protein tweety homolog 3 isoform X1 [Aythya fuligula]
ENSAPLG00020005799	6.89533	47.4183	2.78175	7.06e-16	3.67e-14	Abhd3	XP_027307764.1 phospholipase ABHD3 isoform X2 [Anas platyrhynchos]
ENSAPLG00020007431	76.2577	295.738	1.95536	7.2e-16	3.73e-14	Suds3	XP_027325762.1 sin3 histone deacetylase corepressor complex component SDS3 [Anas platyrhynchos]
ENSAPLG00020013094	16.2663	82.3823	2.34045	7.24e-16	3.74e-14	CCDC28A	OXB68442.1 hypothetical protein ASZ78_010063 [Callipepla squamata]
ENSAPLG00020005949	0.247	51.4863	7.70353	7.35e-16	3.78e-14	SLC18A2	XP_032047681.1 synaptic vesicular amine transporter [Aythya fuligula]
ENSAPLG00020010811	0.001	81.8767	16.3212	8.06e-16	4.13e-14	--	XP_038025341.1 histidine triad nucleotide-binding protein 1-like isoform X3 [Anas platyrhynchos]
ENSAPLG00020000910	0.954667	29.0363	4.92672	8.82e-16	4.51e-14	Sytl2	XP_038033441.1 synaptotagmin-like protein 2 isoform X4 [Anas platyrhynchos]
ENSAPLG00020006175	327.953	87.9063	-1.89945	1.05e-15	5.37e-14	Gpd1	XP_027318136.1 glycerol-3-phosphate dehydrogenase [NAD(+)], cytoplasmic [Anas platyrhynchos]
ENSAPLG00020012879	0.956667	6.24167	2.70584	1.38e-15	7.01e-14	Casz1	XP_040389201.1 zinc finger protein castor homolog 1 isoform X3 [Cygnus olor]
ENSAPLG00020018224	0.418667	5.035	3.58812	1.72e-15	8.71e-14	SETBP1	XP_038025680.1 SET-binding protein isoform X1 [Anas platyrhynchos]
ENSAPLG00020000602	1.845	17.1977	3.22052	1.93e-15	9.73e-14	PLXDC2	XP_027306463.1 plexin domain-containing protein 2 isoform X2 [Anas platyrhynchos]
MSTRG.15638	46.911	11.0727	-2.08292	2.3e-15	1.16e-13	wrn	XP_027311907.2 taxid=8839 Werner syndrome ATP-dependent helicase isoform X1 [Anas platyrhynchos]
ENSAPLG00020008058	19.7263	1.97067	-3.32337	2.34e-15	1.17e-13	CASR	XP_027305513.2 LOW QUALITY PROTEIN: extracellular calcium-sensing receptor [Anas platyrhynchos]
ENSAPLG00020001943	2.68867	21.6283	3.00796	2.35e-15	1.17e-13	TDRD6	XP_012964686.3 tudor domain-containing protein 6 [Anas platyrhynchos]
ENSAPLG00020010831	7.12833	72.2963	3.34229	2.79e-15	1.39e-13	gag	XP_021237243.1 endogenous retrovirus group K member 113 Gag polyprotein-like [Numida meleagris]
MSTRG.3557	0.001	10.6723	13.3816	3.25e-15	1.61e-13	--	-
ENSAPLG00020012412	0.806	15.8437	4.29698	3.3e-15	1.63e-13	IL12RB1	XP_035203908.1 interleukin-12 receptor subunit beta-1 isoform X1 [Oxyura jamaicensis]
ENSAPLG00020006051	20.0577	1.86567	-3.42639	3.52e-15	1.73e-13	TTC38	XP_035406959.1 tetratricopeptide repeat protein 38 [Cygnus atratus]
ENSAPLG00020010649	25.812	3.527	-2.87153	4.75e-15	2.33e-13	Cdc42bpa	XP_027309463.1 serine/threonine-protein kinase MRCK alpha isoform X4 [Anas platyrhynchos]
ENSAPLG00020004839	4.561	28.1927	2.6279	4.87e-15	2.38e-13	AMY2A	XP_027318374.1 pancreatic alpha-amylase [Anas platyrhynchos]
ENSAPLG00020007738	8.751	60.5537	2.79069	5.13e-15	2.5e-13	KLF2	XP_027327815.1 Krueppel-like factor 2 [Anas platyrhynchos]
ENSAPLG00020015803	81.3837	14.443	-2.49437	6.34e-15	3.08e-13	Tbc1d2	XP_038026383.1 TBC1 domain family member 2A [Anas platyrhynchos]
ENSAPLG00020007786	4.20533	76.5493	4.1861	6.73e-15	3.26e-13	--	XP_005029611.1 lymphotactin [Anas platyrhynchos]
ENSAPLG00020010612	1.377	14.111	3.35722	6.96e-15	3.36e-13	TRIM27	XP_005018362.3 E3 ubiquitin-protein ligase TRIM39-like [Anas platyrhynchos]
ENSAPLG00020004748	10.3523	55.0753	2.41145	7.06e-15	3.4e-13	nbeal2	XP_038030044.1 LOW QUALITY PROTEIN: neurobeachin-like protein 2 [Anas platyrhynchos]
ENSAPLG00020005796	70.6203	15.4763	-2.19002	7.26e-15	3.48e-13	Mocs1	XP_027309845.2 molybdenum cofactor biosynthesis protein 1 isoform X2 [Anas platyrhynchos]
ENSAPLG00020002725	858.556	4082.82	2.24958	7.27e-15	3.48e-13	CLEC2D	AAT73605.1 AICL-like 2 [Anas platyrhynchos]
ENSAPLG00020008450	224.886	48.859	-2.2025	9.29e-15	4.43e-13	CRYL1	XP_027324754.1 lambda-crystallin homolog isoform X1 [Anas platyrhynchos]
ENSAPLG00020015748	0.001	32.5643	14.991	9.64e-15	4.58e-13	ISL2	XP_027321411.1 insulin gene enhancer protein ISL-2 [Anas platyrhynchos]
MSTRG.12867	0.359	5.574	3.95666	9.68e-15	4.58e-13	--	-
ENSAPLG00020017470	62.36	222.609	1.83582	9.71e-15	4.58e-13	PDE4B	XP_027319612.1 cAMP-specific 3',5'-cyclic phosphodiesterase 4B isoform X1 [Anas platyrhynchos]
ENSAPLG00020011978	46.561	10.296	-2.17704	9.72e-15	4.58e-13	Txndc5	XP_027307403.1 thioredoxin domain-containing protein 5 isoform X1 [Anas platyrhynchos]
ENSAPLG00020015181	11.033	40.8633	1.88898	1.08e-14	5.08e-13	NET1	XP_038042636.1 neuroepithelial cell-transforming gene 1 protein isoform X2 [Anas platyrhynchos]
ENSAPLG00020016847	19.2617	102.34	2.40956	1.2e-14	5.63e-13	RBM43	XP_027314137.1 RNA-binding protein 43 [Anas platyrhynchos]
ENSAPLG00020009265	217.948	60.4563	-1.85002	1.23e-14	5.76e-13	Sec14l1	XP_038021209.1 SEC14-like protein 1 [Anas platyrhynchos]
ENSAPLG00020010820	0.001	56.0767	15.7751	1.49e-14	6.95e-13	--	BAA94872.1 Wpkci, partial [Anas platyrhynchos]
ENSAPLG00020010626	17.2027	2.01633	-3.09283	1.52e-14	7.03e-13	GRHPR	XP_027301971.1 glyoxylate reductase/hydroxypyruvate reductase [Anas platyrhynchos]
ENSAPLG00020000470	74.7193	273.094	1.86984	1.55e-14	7.15e-13	NUB1	XP_027306188.1 NEDD8 ultimate buster 1 [Anas platyrhynchos]
ENSAPLG00020008599	76.1567	263.875	1.79281	1.78e-14	8.2e-13	OGFR	XP_027328879.2 opioid growth factor receptor isoform X1 [Anas platyrhynchos]
ENSAPLG00020012329	180.043	621.374	1.78712	1.86e-14	8.54e-13	Acod1	XP_005031858.3 cis-aconitate decarboxylase isoform X2 [Anas platyrhynchos]
ENSAPLG00020017414	0.615333	10.016	4.02479	1.92e-14	8.77e-13	TNN	XP_038039181.1 tenascin-N [Anas platyrhynchos]
ENSAPLG00020015209	39.7647	139.882	1.81465	2.08e-14	9.52e-13	Tiparp	XP_027320299.2 protein mono-ADP-ribosyltransferase TIPARP [Anas platyrhynchos]
ENSAPLG00020004180	10.0917	73.7047	2.86859	2.37e-14	1.08e-12	TNIP3	XP_038034670.1 LOW QUALITY PROTEIN: TNFAIP3-interacting protein 3 [Anas platyrhynchos]
ENSAPLG00020006615	40.9517	176.209	2.10529	2.4e-14	1.09e-12	TAP1	XP_038028428.1 LOW QUALITY PROTEIN: antigen peptide transporter 1 [Anas platyrhynchos]
ENSAPLG00020015334	99.5207	16.6307	-2.58115	2.74e-14	1.24e-12	Dapk2	XP_032060429.1 death-associated protein kinase 2-like [Aythya fuligula]
ENSAPLG00020007343	6.768	40.509	2.58144	2.75e-14	1.24e-12	TGL2	XP_038022183.1 protein-glutamine gamma-glutamyltransferase 2 [Anas platyrhynchos]
ENSAPLG00020001579	237.635	1112.7	2.22725	2.78e-14	1.25e-12	LY6E	XP_005016120.1 lymphocyte antigen 6E isoform X1 [Anas platyrhynchos]
ENSAPLG00020004278	0.608667	14.1103	4.53496	2.88e-14	1.29e-12	ALDH3B1	XP_032045003.1 aldehyde dehydrogenase family 3 member B1 isoform X1 [Aythya fuligula]
MSTRG.8117	0.589333	6.601	3.48553	2.89e-14	1.29e-12	--	EOA96047.1 taxid=8839 hypothetical protein Anapl_03867 [Anas platyrhynchos]
ENSAPLG00020007848	3.42367	39.0517	3.51177	2.92e-14	1.3e-12	Plvap	XP_027328211.2 plasmalemma vesicle-associated protein isoform X2 [Anas platyrhynchos]
ENSAPLG00020011145	153.599	37.257	-2.04359	3.68e-14	1.63e-12	EPHX4	XP_038038703.1 epoxide hydrolase 4 isoform X1 [Anas platyrhynchos]
ENSAPLG00020006788	127.647	567.915	2.15351	3.69e-14	1.63e-12	SERPINE2	XP_035400535.1 glia-derived nexin isoform X5 [Cygnus atratus]
ENSAPLG00020014659	2.56033	31.447	3.61852	3.71e-14	1.64e-12	RGS4	XP_012960053.1 regulator of G-protein signaling 4 isoform X2 [Anas platyrhynchos]
ENSAPLG00020005177	5.452	36.896	2.75861	3.83e-14	1.69e-12	EZR	XP_032041357.1 ezrin isoform X1 [Aythya fuligula]
ENSAPLG00020001096	60.3523	196.308	1.70164	4e-14	1.76e-12	PARP14	XP_038038197.1 protein mono-ADP-ribosyltransferase PARP14 isoform X2 [Anas platyrhynchos]
MSTRG.1344	3.48167	36.643	3.39569	4.64e-14	2.03e-12	Nobox	XP_027305726.1 taxid=8839 homeobox protein NOBOX isoform X1 [Anas platyrhynchos]
ENSAPLG00020002724	140.825	31.39	-2.16553	4.89e-14	2.14e-12	SETD7	XP_027312539.1 histone-lysine N-methyltransferase SETD7 [Anas platyrhynchos]
ENSAPLG00020016380	1.346	22.562	4.06714	4.92e-14	2.14e-12	Dpep2	XP_038041300.1 dipeptidase 2 [Anas platyrhynchos]
ENSAPLG00020006912	27.54	110.004	1.99796	4.96e-14	2.15e-12	ATP2A3	XP_032056536.1 sarcoplasmic/endoplasmic reticulum calcium ATPase 3 [Aythya fuligula]
ENSAPLG00020015436	39.0997	4.93167	-2.98701	5.14e-14	2.22e-12	GXYLT2	EOA96937.1 Glycosyltransferase 8 domain-containing protein 4, partial [Anas platyrhynchos]
ENSAPLG00020013543	74.9283	16.048	-2.22312	5.21e-14	2.25e-12	AQP9	EOB06926.1 Aquaporin-9, partial [Anas platyrhynchos]
ENSAPLG00020003107	51.6237	11.156	-2.21021	5.6e-14	2.41e-12	MAN1C1	XP_038023082.1 mannosyl-oligosaccharide 1,2-alpha-mannosidase IC isoform X1 [Anas platyrhynchos]
ENSAPLG00020009893	0.0946667	3.613	5.2542	5.89e-14	2.53e-12	CACNA1E	XP_040422308.1 voltage-dependent R-type calcium channel subunit alpha-1E isoform X7 [Cygnus olor]
ENSAPLG00020000100	0.890333	6.75667	2.92389	6e-14	2.57e-12	GVINP1	XP_038033106.1 interferon-induced very large GTPase 1-like [Anas platyrhynchos]
ENSAPLG00020007150	2.08767	24.4777	3.5515	6.02e-14	2.57e-12	RHOF	XP_035196477.1 rho-related GTP-binding protein RhoF isoform X2 [Oxyura jamaicensis]
ENSAPLG00020006995	9.56067	49.7557	2.37968	6.15e-14	2.62e-12	SPARC	XP_005010591.1 SPARC isoform X1 [Anas platyrhynchos]
ENSAPLG00020004019	413.248	102.281	-2.01447	6.26e-14	2.66e-12	SLC17A5	EOB08512.1 Sialin, partial [Anas platyrhynchos]
ENSAPLG00020005914	17.3917	96.2133	2.46784	6.57e-14	2.78e-12	GPR65	XP_005017874.1 psychosine receptor [Anas platyrhynchos]
MSTRG.17879	6.768	32.0643	2.24417	7.29e-14	3.08e-12	--	-
ENSAPLG00020009565	145.775	40.7707	-1.83814	7.37e-14	3.1e-12	DAPK1	XP_038026185.1 death-associated protein kinase 1 [Anas platyrhynchos]
ENSAPLG00020008613	8.28933	32.7963	1.98421	7.68e-14	3.22e-12	Akap2	XP_038026061.1 A-kinase anchor protein 2 isoform X2 [Anas platyrhynchos]
ENSAPLG00020013933	1.262	10.6347	3.07499	8.88e-14	3.71e-12	ECE1	XP_027298934.2 LOW QUALITY PROTEIN: endothelin-converting enzyme 1 [Anas platyrhynchos]
ENSAPLG00020007475	0.001	7.44733	12.8625	8.94e-14	3.73e-12	ZFR	XP_038025518.1 zinc finger RNA-binding protein-like isoform X2 [Anas platyrhynchos]
ENSAPLG00020005113	9.898	51.8077	2.38796	1.01e-13	4.19e-12	Fadd	XP_005022835.1 FAS-associated death domain protein [Anas platyrhynchos]
ENSAPLG00020010134	23.81	110.323	2.21209	1.05e-13	4.37e-12	SULF2	XP_012951995.1 extracellular sulfatase Sulf-2 [Anas platyrhynchos]
ENSAPLG00020007799	0.578	11.6233	4.32981	1.07e-13	4.44e-12	TBXA2R	XP_038025007.1 thromboxane A2 receptor [Anas platyrhynchos]
MSTRG.2857	0.828	10.9913	3.73059	1.09e-13	4.49e-12	--	-
ENSAPLG00020017003	0.165333	12.4893	6.23918	1.15e-13	4.71e-12	PPM1E	XP_027327751.2 protein phosphatase 1E isoform X1 [Anas platyrhynchos]
ENSAPLG00020017283	14.2303	70.4563	2.30776	1.2e-13	4.94e-12	GPR174	XP_038040303.1 probable G-protein coupled receptor 174 [Anas platyrhynchos]
ENSAPLG00020015768	14.374	66.0077	2.19917	1.24e-13	5.06e-12	CISH	XP_005026511.1 cytokine-inducible SH2-containing protein [Anas platyrhynchos]
ENSAPLG00020011717	151.029	674.675	2.15937	1.31e-13	5.34e-12	GIMAP7	XP_038030417.1 GTPase IMAP family member 7-like isoform X1 [Anas platyrhynchos]
ENSAPLG00020014032	0.559667	7.848	3.80969	1.48e-13	6.02e-12	ADCY6	XP_032060677.1 adenylate cyclase type 6 [Aythya fuligula]
ENSAPLG00020006333	15.1227	82.5307	2.44822	1.51e-13	6.14e-12	APRT	XP_027321528.2 adenine phosphoribosyltransferase [Anas platyrhynchos]
ENSAPLG00020002773	5.14267	28.676	2.47926	1.54e-13	6.25e-12	ADORA2A	XP_005023617.1 adenosine receptor A2a [Anas platyrhynchos]
ENSAPLG00020017435	35.642	4.81167	-2.88897	1.56e-13	6.3e-12	NPL	XP_032048248.1 N-acetylneuraminate lyase isoform X1 [Aythya fuligula]
ENSAPLG00020018001	0.208	9.443	5.50459	1.64e-13	6.62e-12	EPCAM	XP_027309425.1 epithelial cell adhesion molecule [Anas platyrhynchos]
ENSAPLG00020016031	52.1517	14.6313	-1.83365	1.72e-13	6.93e-12	ACAC	XP_038021815.1 acetyl-CoA carboxylase 1 isoform X1 [Anas platyrhynchos]
ENSAPLG00020003181	54.5583	7.53933	-2.85529	1.87e-13	7.48e-12	RIHB	XP_027315068.1 midkine [Anas platyrhynchos]
ENSAPLG00020015818	83.409	15.361	-2.44093	2.17e-13	8.67e-12	Cadm1	XP_032057725.1 cell adhesion molecule 1 isoform X1 [Aythya fuligula]
MSTRG.5023	11.9387	49.289	2.04562	2.33e-13	9.29e-12	NLRC5	XP_012955436.3 taxid=8839 LOW QUALITY PROTEIN: protein NLRC5 [Anas platyrhynchos]
ENSAPLG00020007137	16.2	60.6883	1.90543	2.39e-13	9.48e-12	LDLRAD4	XP_027307729.1 low-density lipoprotein receptor class A domain-containing protein 4 isoform X1 [Anas platyrhynchos]
ENSAPLG00020003044	0.001	12.211	13.5759	2.5e-13	9.91e-12	IGHM	AAK17935.1 membrane-bound immunoglobulin alpha heavy chain, partial [Anas platyrhynchos]
ENSAPLG00020008539	195.284	49.0893	-1.99209	2.8e-13	1.11e-11	IQGAP2	XP_038027414.1 ras GTPase-activating-like protein IQGAP2 isoform X4 [Anas platyrhynchos]
ENSAPLG00020001873	11.2417	59.0453	2.39297	2.84e-13	1.12e-11	DONSON	EOB05537.1 Protein downstream neighbor of son-like protein, partial [Anas platyrhynchos]
ENSAPLG00020008119	0.987	15.007	3.92644	3.27e-13	1.28e-11	ADM	XP_027317696.2 pro-adrenomedullin [Anas platyrhynchos]
ENSAPLG00020009878	517.016	81.0667	-2.67303	3.44e-13	1.35e-11	ME1	XP_038033095.1 NADP-dependent malic enzyme [Anas platyrhynchos]
ENSAPLG00020003750	10.3007	69.985	2.76431	3.46e-13	1.35e-11	GAS6	XP_032055533.1 growth arrest-specific protein 6 [Aythya fuligula]
MSTRG.20647	21.6057	113.148	2.38873	3.65e-13	1.42e-11	Zfp36	XP_038025295.1 taxid=8839 mRNA decay activator protein ZFP36-like [Anas platyrhynchos]
ENSAPLG00020011757	136.823	448.281	1.71209	4.14e-13	1.61e-11	ZNFX1	XP_027328667.2 NFX1-type zinc finger-containing protein 1 isoform X1 [Anas platyrhynchos]
ENSAPLG00020000192	29.2733	124.982	2.09407	4.3e-13	1.67e-11	NFKB1	XP_032041860.1 nuclear factor NF-kappa-B p105 subunit isoform X3 [Aythya fuligula]
ENSAPLG00020010824	24.0117	87.0293	1.85777	4.41e-13	1.71e-11	IKBKE	XP_027300925.1 LOW QUALITY PROTEIN: inhibitor of nuclear factor kappa-B kinase subunit epsilon [Anas platyrhynchos]
ENSAPLG00020006716	19.8547	4.07333	-2.2852	4.73e-13	1.83e-11	CYP46A1	XP_027314408.1 cholesterol 24-hydroxylase [Anas platyrhynchos]
ENSAPLG00020011690	82.4467	10.3003	-3.00077	5.01e-13	1.93e-11	TGFB3	XP_038036150.1 transforming growth factor beta-3 proprotein [Anas platyrhynchos]
ENSAPLG00020003819	680.679	185.927	-1.87224	5.03e-13	1.93e-11	LPL	XP_027302192.2 lipoprotein lipase [Anas platyrhynchos]
ENSAPLG00020005765	5.73433	34.9343	2.60695	5.17e-13	1.98e-11	NCKAP1	XP_027317208.1 nck-associated protein 1 isoform X1 [Anas platyrhynchos]
MSTRG.8376	6.78633	0.259333	-4.70975	5.29e-13	2.02e-11	--	-
ENSAPLG00020008433	75.8397	279.998	1.88439	5.46e-13	2.08e-11	Samd9l	XP_027327433.2 sterile alpha motif domain-containing protein 9-like isoform X2 [Anas platyrhynchos]
ENSAPLG00020000441	5.713	46.3897	3.02148	5.65e-13	2.15e-11	CHAC1	XP_027315366.2 LOW QUALITY PROTEIN: glutathione-specific gamma-glutamylcyclotransferase 1 [Anas platyrhynchos]
ENSAPLG00020002296	36.3357	162.29	2.15911	5.9e-13	2.24e-11	PXK	XP_032049758.1 PX domain-containing protein kinase-like protein isoform X1 [Aythya fuligula]
MSTRG.5662	6.35433	29.5063	2.21521	6.05e-13	2.29e-11	--	EOB01762.1 taxid=8839 hypothetical protein Anapl_14448 [Anas platyrhynchos]
ENSAPLG00020010699	0.064	37.5287	9.19571	6.1e-13	2.3e-11	BTF3	XP_038025334.1 transcription factor BTF3 isoform X1 [Anas platyrhynchos]
ENSAPLG00020011206	13.971	1.36433	-3.35617	6.29e-13	2.37e-11	EFEMP1	XP_013046558.1 PREDICTED: EGF-containing fibulin-like extracellular matrix protein 1 [Anser cygnoides domesticus]
ENSAPLG00020015145	0.128333	8.94833	6.12365	6.65e-13	2.5e-11	Elf3	XP_027300797.1 ETS-related transcription factor Elf-3 [Anas platyrhynchos]
MSTRG.11488	49.1097	7.19367	-2.77121	6.93e-13	2.59e-11	PLXDC1	XP_038024493.1 taxid=8839 plexin domain-containing protein 1, partial [Anas platyrhynchos]
ENSAPLG00020001669	9.19033	58.0273	2.65854	7.77e-13	2.9e-11	Ankrd33b	XP_027307535.1 ankyrin repeat domain-containing protein 33B [Anas platyrhynchos]
ENSAPLG00020014552	0.0193333	9.19433	8.89351	8.77e-13	3.27e-11	UBAP2	XP_038025567.1 ubiquitin-associated protein 2 isoform X2 [Anas platyrhynchos]
ENSAPLG00020002102	14.093	2.611	-2.4323	9.41e-13	3.5e-11	Trpm1	XP_038040638.1 transient receptor potential cation channel subfamily M member 1 isoform X1 [Anas platyrhynchos]
ENSAPLG00020009313	74.0417	243.259	1.71609	1.02e-12	3.8e-11	KLF6	EOB07314.1 Krueppel-like factor 6, partial [Anas platyrhynchos]
ENSAPLG00020006166	10.021	57.0767	2.50987	1.05e-12	3.9e-11	Art5	XP_027321243.2 LOW QUALITY PROTEIN: ecto-ADP-ribosyltransferase 5 [Anas platyrhynchos]
ENSAPLG00020015700	10.312	55.0793	2.41719	1.07e-12	3.94e-11	PIM1	XP_027300530.2 LOW QUALITY PROTEIN: serine/threonine-protein kinase pim-1 [Anas platyrhynchos]
ENSAPLG00020013753	0.855	10.7097	3.64685	1.1e-12	4.05e-11	TJP1	XP_038040827.1 tight junction protein ZO-1 isoform X1 [Anas platyrhynchos]
ENSAPLG00020001808	13.9433	53.1577	1.9307	1.16e-12	4.27e-11	Ranbp2	XP_032044246.1 ranBP2-like and GRIP domain-containing protein 3 [Aythya fuligula]
ENSAPLG00020013852	0.515333	6.25667	3.60182	1.19e-12	4.35e-11	MICAL3	XP_013028420.1 PREDICTED: protein-methionine sulfoxide oxidase MICAL3 isoform X1 [Anser cygnoides domesticus]
ENSAPLG00020010325	15.285	68.809	2.17048	1.26e-12	4.61e-11	CFLAR	XP_012950195.1 CASP8 and FADD-like apoptosis regulator isoform X1 [Anas platyrhynchos]
ENSAPLG00020006732	5.39433	23.936	2.14967	1.27e-12	4.62e-11	LRRC8B	XP_032047807.1 volume-regulated anion channel subunit LRRC8B [Aythya fuligula]
ENSAPLG00020010868	0.0546667	11.9283	7.76952	1.39e-12	5.05e-11	FGFR1	XP_040394162.1 fibroblast growth factor receptor 1 isoform X1 [Cygnus olor]
ENSAPLG00020009815	0.143333	4.44433	4.95452	1.4e-12	5.09e-11	ITGA10	XP_038028653.1 LOW QUALITY PROTEIN: integrin alpha-10 [Anas platyrhynchos]
ENSAPLG00020010474	62.8863	262.474	2.06136	1.46e-12	5.28e-11	RNF19B	KAF1596179.1 E3 ubiquitin-protein ligase RNF19B, partial [Eudyptes moseleyi]
ENSAPLG00020014286	13.2213	55.4633	2.06867	1.49e-12	5.38e-11	SULT1B1	XP_027311829.2 sulfotransferase family cytosolic 1B member 1 [Anas platyrhynchos]
ENSAPLG00020005385	47.224	156.307	1.72679	1.5e-12	5.38e-11	TTC3	XP_027304923.2 E3 ubiquitin-protein ligase TTC3 isoform X1 [Anas platyrhynchos]
ENSAPLG00020000169	358.907	109.952	-1.70673	1.56e-12	5.62e-11	INSIG1	XP_032037692.1 insulin-induced gene 1 protein [Aythya fuligula]
ENSAPLG00020008346	33.1437	114.744	1.79161	1.58e-12	5.66e-11	SLC46A2	XP_038026067.1 thymic stromal cotransporter homolog [Anas platyrhynchos]
ENSAPLG00020018291	0.001	184.979	17.497	1.63e-12	5.84e-11	IFN	XP_038025743.1 interferon-like [Anas platyrhynchos]
ENSAPLG00020006021	90.09	284.119	1.65706	1.71e-12	6.11e-11	ZC3HAV1	XP_027309840.2 zinc finger CCCH-type antiviral protein 1 isoform X1 [Anas platyrhynchos]
ENSAPLG00020012760	0.297333	14.1443	5.572	1.72e-12	6.13e-11	PLEKHG1	EOB09158.1 hypothetical protein Anapl_05316, partial [Anas platyrhynchos]
ENSAPLG00020001974	0.278667	11.12	5.31847	1.82e-12	6.46e-11	PACSIN3	XP_027315168.1 protein kinase C and casein kinase substrate in neurons protein 3 isoform X1 [Anas platyrhynchos]
ENSAPLG00020000650	220.637	734.413	1.73492	1.88e-12	6.65e-11	NFKBIA	XP_027314416.1 NF-kappa-B inhibitor alpha [Anas platyrhynchos]
ENSAPLG00020018239	0.203667	5.49167	4.75296	2.04e-12	7.21e-11	Cavin1	XP_013055225.1 PREDICTED: polymerase I and transcript release factor [Anser cygnoides domesticus]
ENSAPLG00020006211	331.314	96.6087	-1.77798	2.15e-12	7.54e-11	SNX4	XP_027318139.1 LOW QUALITY PROTEIN: sorting nexin-4 [Anas platyrhynchos]
ENSAPLG00020016401	9.24933	48.0547	2.37726	2.15e-12	7.54e-11	TRIM58	XP_027301764.2 E3 ubiquitin-protein ligase TRIM39-like [Anas platyrhynchos]
ENSAPLG00020005990	0.351667	12.3773	5.13735	2.22e-12	7.79e-11	BCL2L14	XP_005010090.3 apoptosis facilitator Bcl-2-like protein 14 [Anas platyrhynchos]
ENSAPLG00020016902	4.80267	27.2693	2.50537	2.32e-12	8.12e-11	NFATC1	XP_032037455.1 nuclear factor of activated T-cells, cytoplasmic 1 isoform X1 [Aythya fuligula]
ENSAPLG00020000087	2.84167	18.9533	2.73764	2.39e-12	8.34e-11	IL1RL1	XP_005013476.1 interleukin-1 receptor-like 1 isoform X3 [Anas platyrhynchos]
ENSAPLG00020004609	0.210667	3.35533	3.99342	2.54e-12	8.85e-11	PPL	XP_027324559.2 LOW QUALITY PROTEIN: periplakin [Anas platyrhynchos]
ENSAPLG00020017204	80.7623	23.6343	-1.7728	2.58e-12	8.98e-11	SPECC1	XP_032056846.1 cytospin-B isoform X1 [Aythya fuligula]
ENSAPLG00020017286	5.475	38.561	2.81621	2.64e-12	9.15e-11	P2RY10	XP_032052384.1 putative P2Y purinoceptor 10 [Aythya fuligula]
ENSAPLG00020009369	28.6507	2.61667	-3.45277	2.78e-12	9.63e-11	tmem116	XP_038043237.1 transmembrane protein 116 [Anas platyrhynchos]
ENSAPLG00020006670	50.8093	166.232	1.71003	2.87e-12	9.89e-11	TAP2	XP_005030429.3 antigen peptide transporter 2 [Anas platyrhynchos]
ENSAPLG00020013747	25.7443	6.31167	-2.02816	2.96e-12	1.02e-10	SDK1	XP_038042781.1 protein sidekick-1 isoform X1 [Anas platyrhynchos]
MSTRG.13502	117.664	272.591	1.21206	2.97e-12	1.02e-10	TNFAIP3	XP_035178477.1 taxid=8884 tumor necrosis factor alpha-induced protein 3 isoform X1 [Oxyura jamaicensis]
ENSAPLG00020002530	325.342	92.8147	-1.80953	3.07e-12	1.05e-10	Alg9	XP_032057825.1 alpha-1,2-mannosyltransferase ALG9 isoform X2 [Aythya fuligula]
ENSAPLG00020005793	57.1913	11.1603	-2.35742	3.17e-12	1.08e-10	PARD3B	XP_027316949.1 partitioning defective 3 homolog B [Anas platyrhynchos]
MSTRG.17729	5.161	27.9053	2.43482	3.89e-12	1.33e-10	--	-
ENSAPLG00020017300	54.3163	15.0383	-1.85274	3.91e-12	1.33e-10	ENTPD1	XP_005013507.1 LOW QUALITY PROTEIN: ectonucleoside triphosphate diphosphohydrolase 1 [Anas platyrhynchos]
ENSAPLG00020016763	157.385	31.9847	-2.29884	4.03e-12	1.37e-10	AOAH	XP_027307238.1 acyloxyacyl hydrolase isoform X1 [Anas platyrhynchos]
ENSAPLG00020010945	12.3557	38.183	1.62776	4.36e-12	1.48e-10	TACC1	XP_038022826.1 transforming acidic coiled-coil-containing protein 1 isoform X4 [Anas platyrhynchos]
ENSAPLG00020017490	1.109	11.8087	3.41251	4.44e-12	1.5e-10	IL23R	XP_032048107.1 interleukin-23 receptor [Aythya fuligula]
MSTRG.1880	2.12633	32.9103	3.9521	4.47e-12	1.51e-10	--	-
ENSAPLG00020006265	102.863	24.5693	-2.06579	4.49e-12	1.51e-10	TNFRSF1A	XP_027305493.1 tumor necrosis factor receptor superfamily member 1A [Anas platyrhynchos]
ENSAPLG00020010775	0.001	8.889	13.1178	4.64e-12	1.56e-10	KCMF1	XP_032062809.1 E3 ubiquitin-protein ligase KCMF1-like isoform X1 [Aythya fuligula]
ENSAPLG00020007715	141.899	38.8283	-1.86969	4.64e-12	1.56e-10	TTL	XP_038032901.1 tubulin--tyrosine ligase [Anas platyrhynchos]
ENSAPLG00020018210	0.815	23.343	4.84005	4.94e-12	1.65e-10	SIGLEC15	XP_038026484.1 sialic acid-binding Ig-like lectin 15 isoform X1 [Anas platyrhynchos]
MSTRG.14326	3.075	24.6117	3.00068	5.02e-12	1.67e-10	--	-
ENSAPLG00020007183	18.3787	74.5587	2.02034	5.02e-12	1.67e-10	Pdgfb	XP_027306635.2 platelet-derived growth factor subunit B [Anas platyrhynchos]
of RNA biosynthetic process
ENSAPLG00020008609	0.432333	13.1133	4.92275	5.07e-12	1.68e-10	Tesc	XP_013051534.1 PREDICTED: LOW QUALITY PROTEIN: calcineurin B homologous protein 3 [Anser cygnoides domesticus]
ENSAPLG00020001070	78.409	17.1823	-2.19009	5.23e-12	1.73e-10	Pyurf	XP_038034556.1 protein preY, mitochondrial [Anas platyrhynchos]
ENSAPLG00020015566	1.18433	16.078	3.76294	5.26e-12	1.74e-10	Gpa33	XP_005017719.2 cell surface A33 antigen [Anas platyrhynchos]
ENSAPLG00020015622	120.272	32.621	-1.88243	5.37e-12	1.77e-10	SMIM14	XP_027313032.2 small integral membrane protein 14 [Anas platyrhynchos]
ENSAPLG00020017316	54.3177	166.257	1.61392	5.39e-12	1.77e-10	TOR1AIP1	XP_032048610.1 torsin-1A-interacting protein 1-like isoform X2 [Aythya fuligula]
MSTRG.9535	0.001	8.05433	12.9755	5.42e-12	1.78e-10	--	XP_065430583.1 taxid=8478 LOW QUALITY PROTEIN: HAUS augmin-like complex subunit 5 [Chrysemys picta bellii]
ENSAPLG00020007794	1.67967	19.2333	3.51736	5.46e-12	1.79e-10	TOR1A	EOB05914.1 Torsin-1B, partial [Anas platyrhynchos]
ENSAPLG00020009255	5.703	26.784	2.23158	5.72e-12	1.87e-10	TIAM2	XP_032041390.1 T-lymphoma invasion and metastasis-inducing protein 2 [Aythya fuligula]
ENSAPLG00020002732	229.735	1367.76	2.57377	6.12e-12	2e-10	Mmp7	XP_005010554.1 matrilysin [Anas platyrhynchos]
ENSAPLG00020016731	25.159	115.55	2.19937	6.3e-12	2.05e-10	MLKL	XP_005009126.2 mixed lineage kinase domain-like protein [Anas platyrhynchos]
ENSAPLG00020009432	200.072	50.466	-1.98714	6.44e-12	2.09e-10	ABCD2	XP_027314719.2 ATP-binding cassette sub-family D member 2 [Anas platyrhynchos]
ENSAPLG00020001147	5.97833	34.7127	2.53765	6.55e-12	2.12e-10	DUSP8	XP_038035840.1 dual specificity protein phosphatase 8 isoform X2 [Anas platyrhynchos]
ENSAPLG00020006841	0.710333	7.29233	3.35981	6.57e-12	2.13e-10	JAKMIP2	XP_005019504.1 janus kinase and microtubule-interacting protein 1 isoform X1 [Anas platyrhynchos]
ENSAPLG00020010004	0.194	16.4513	6.406	6.95e-12	2.25e-10	HBB	XP_035186908.1 hemoglobin subunit epsilon isoform X1 [Oxyura jamaicensis]
ENSAPLG00020002971	0.759333	28.7373	5.24205	7.06e-12	2.27e-10	ITGA2	XP_038026831.1 integrin alpha-2 [Anas platyrhynchos]
ENSAPLG00020012280	0.381667	4.12	3.43226	7.33e-12	2.36e-10	Tinagl1	XP_032058375.1 tubulointerstitial nephritis antigen-like [Aythya fuligula]
ENSAPLG00020017627	0.059	4.23733	6.1663	7.6e-12	2.44e-10	HTR2C	XP_005016654.1 5-hydroxytryptamine receptor 2A isoform X1 [Anas platyrhynchos]
ENSAPLG00020007067	307.451	71.1173	-2.11208	9.42e-12	3.02e-10	ABCC5	XP_032049100.1 multidrug resistance-associated protein 5 isoform X1 [Aythya fuligula]
ENSAPLG00020002088	156.958	35.7457	-2.13454	9.54e-12	3.04e-10	MAP4K4	XP_032051936.1 nik-related protein kinase isoform X1 [Aythya fuligula]
ENSAPLG00020005811	322.003	91.448	-1.81605	9.55e-12	3.04e-10	PTPRA	EOB08200.1 Receptor-type tyrosine-protein phosphatase alpha, partial [Anas platyrhynchos]
ENSAPLG00020010049	105.332	30.6177	-1.78251	9.7e-12	3.08e-10	UCK1	XP_038044057.1 LOW QUALITY PROTEIN: uridine-cytidine kinase 1 [Anas platyrhynchos]
MSTRG.619	0.001	9.643	13.2353	9.71e-12	3.08e-10	--	XP_032057653.1 taxid=219594 uncharacterized protein LOC116497819 [Aythya fuligula]
ENSAPLG00020010061	131.987	30.5977	-2.1089	9.97e-12	3.15e-10	GPATCH11	XP_005022277.1 G patch domain-containing protein 11 isoform X1 [Anas platyrhynchos]
ENSAPLG00020001663	0.541333	10.3443	4.25618	9.97e-12	3.15e-10	TRIB2	XP_032860444.1 tribbles homolog 2 isoform X1 [Tyto alba alba]
ENSAPLG00020013562	345.713	115.19	-1.58556	1.02e-11	3.23e-10	Scd1	XP_027315890.1 acyl-CoA desaturase [Anas platyrhynchos]
ENSAPLG00020000696	64.023	17.584	-1.86433	1.03e-11	3.23e-10	PALLD	XP_021127455.3 palladin isoform X2 [Anas platyrhynchos]
ENSAPLG00020015907	1137.45	186.661	-2.60732	1.06e-11	3.34e-10	CHIA	XP_038024147.1 acidic mammalian chitinase isoform X1 [Anas platyrhynchos]
ENSAPLG00020007923	2.30633	29.5207	3.67805	1.11e-11	3.48e-10	ITK	XP_032052846.1 tyrosine-protein kinase ITK/TSK isoform X1 [Aythya fuligula]
ENSAPLG00020000597	35.797	3.391	-3.40006	1.26e-11	3.94e-10	STIMATE	XP_027316675.1 store-operated calcium entry regulator STIMATE [Anas platyrhynchos]
MSTRG.19008	0.697	5.97133	3.09882	1.27e-11	3.95e-10	--	KAK2523653.1 taxid=135627 hypothetical protein Q9233_009993 [Columba guinea]
ENSAPLG00020009499	75.6993	19.547	-1.95333	1.27e-11	3.95e-10	AGTPBP1	XP_038027394.1 cytosolic carboxypeptidase 1 isoform X1 [Anas platyrhynchos]
ENSAPLG00020014708	0.001	6.594	12.6869	1.35e-11	4.19e-10	NTRK1	XP_032060533.1 high affinity nerve growth factor receptor [Aythya fuligula]
ENSAPLG00020010817	7.95067	0.311	-4.67609	1.45e-11	4.49e-10	wif1	XP_032055215.1 wnt inhibitory factor 1 [Aythya fuligula]
ENSAPLG00020011408	2.733	0.210333	-3.69974	1.46e-11	4.52e-10	ACACB	XP_038043378.1 LOW QUALITY PROTEIN: acetyl-CoA carboxylase 2 [Anas platyrhynchos]
ENSAPLG00020013529	21.9733	75.7477	1.78545	1.48e-11	4.57e-10	MAP2K3	XP_040430280.1 dual specificity mitogen-activated protein kinase kinase 3 isoform X1 [Cygnus olor]
ENSAPLG00020010761	0.001	3.664	11.8392	1.53e-11	4.72e-10	Zswim6	XP_038025401.1 zinc finger SWIM domain-containing protein 6 isoform X1 [Anas platyrhynchos]
ENSAPLG00020010883	0.001	4.27933	12.0632	1.58e-11	4.87e-10	Rasa1	XP_038025409.1 ras GTPase-activating protein 1 isoform X1 [Anas platyrhynchos]
ENSAPLG00020005174	0.052	19.354	8.5399	1.62e-11	4.98e-10	PPBP	XP_032042112.1 interleukin-8-like [Aythya fuligula]
ENSAPLG00020012112	2.13667	17.4817	3.03241	1.66e-11	5.07e-10	pol	XP_014810274.1 PREDICTED: uncharacterized protein LOC106895380 [Calidris pugnax]
ENSAPLG00020007387	0.001	7.48233	12.8693	1.66e-11	5.07e-10	TMEM233	XP_038043611.1 transmembrane protein 233 isoform X3 [Anas platyrhynchos]
MSTRG.14631	0.001	11.2803	13.4615	1.8e-11	5.5e-10	BTN1A1	XP_038043773.1 taxid=8839 tripartite motif-containing protein 15 isoform X9 [Anas platyrhynchos]
ENSAPLG00020008820	179.273	61.1093	-1.5527	1.81e-11	5.5e-10	ERLIN2	XP_038022836.1 erlin-2 [Anas platyrhynchos]
ENSAPLG00020014395	25.001	83.1283	1.73335	1.82e-11	5.52e-10	Traf1	XP_027326469.1 TNF receptor-associated factor 1 isoform X3 [Anas platyrhynchos]
ENSAPLG00020015669	23.748	3.63633	-2.70725	1.85e-11	5.6e-10	--	XP_027300664.2 LOW QUALITY PROTEIN: uncharacterized protein LOC113839922 [Anas platyrhynchos]
MSTRG.14845	5.48633	30.6877	2.48374	1.98e-11	6e-10	--	XP_038027528.1 taxid=8839 uncharacterized protein LOC101796470 isoform X1 [Anas platyrhynchos]
ENSAPLG00020005206	1.66167	14.4127	3.11663	2.1e-11	6.33e-10	SYTL3	XP_012950795.2 synaptotagmin-like protein 3 [Anas platyrhynchos]
MSTRG.4165	139.867	41.4793	-1.75359	2.1e-11	6.34e-10	--	XP_032052275.1 taxid=219594 uncharacterized protein LOC116494468 [Aythya fuligula]
ENSAPLG00020010066	0.389667	5.11767	3.71517	2.22e-11	6.68e-10	VAT1L	XP_005018314.2 synaptic vesicle membrane protein VAT-1 homolog-like [Anas platyrhynchos]
ENSAPLG00020010434	195.298	679.613	1.79904	2.38e-11	7.13e-10	Tagln2	XP_038023854.1 LOW QUALITY PROTEIN: protein turtle homolog A [Anas platyrhynchos]
ENSAPLG00020002460	0.0823333	4.928	5.90338	2.39e-11	7.16e-10	AFAP1L1	XP_027320673.1 actin filament-associated protein 1-like 1 isoform X2 [Anas platyrhynchos]
ENSAPLG00020017191	21.897	85.7083	1.9687	2.42e-11	7.24e-10	Hectd3	XP_038039088.1 E3 ubiquitin-protein ligase HECTD3 isoform X2 [Anas platyrhynchos]
ENSAPLG00020003666	49.852	203.442	2.0289	2.46e-11	7.33e-10	--	XP_038024323.1 macrophage colony-stimulating factor 1 isoform X3 [Anas platyrhynchos]
ENSAPLG00020002813	82.115	25.6817	-1.67691	2.53e-11	7.54e-10	PARP8	XP_032062036.1 protein mono-ADP-ribosyltransferase PARP8 [Aythya fuligula]
ENSAPLG00020013705	0.653333	14.1903	4.44095	2.59e-11	7.69e-10	GDF11	XP_032060715.1 growth/differentiation factor 11 [Aythya fuligula]
ENSAPLG00020010690	0.062	12.2317	7.62414	2.73e-11	8.09e-10	RBPMS2	NP_990200.1 RNA-binding protein with multiple splicing 2 [Gallus gallus]
ENSAPLG00020004204	57.189	14.3083	-1.99888	2.86e-11	8.48e-10	PANX1	XP_027323298.1 pannexin-1 [Anas platyrhynchos]
ENSAPLG00020005808	0.232667	9.40133	5.33653	2.93e-11	8.66e-10	Ighm	CAC43281.1 immunoglobulin mu heavy chain, partial [Anas platyrhynchos]
MSTRG.5160	0.216667	9.771	5.49496	3.06e-11	9.01e-10	--	XP_027322798.1 taxid=8839 uncharacterized protein LOC101796494 isoform X2 [Anas platyrhynchos]
ENSAPLG00020015665	32.6247	7.89633	-2.04671	3.29e-11	9.69e-10	--	XP_032058902.1 natural cytotoxicity triggering receptor 2 [Aythya fuligula]
ENSAPLG00020002188	0.855	10.236	3.58158	3.31e-11	9.74e-10	INPP4B	XP_032042443.1 inositol polyphosphate 4-phosphatase type II isoform X2 [Aythya fuligula]
ENSAPLG00020012574	3.71467	26.505	2.83496	3.35e-11	9.81e-10	ASAP3	XP_038023275.1 LOW QUALITY PROTEIN: arf-GAP with SH3 domain, ANK repeat and PH domain-containing protein 3 [Anas platyrhynchos]
ENSAPLG00020014337	899.571	177.481	-2.34157	3.59e-11	1.05e-09	Naaa	XP_027311869.2 N-acylethanolamine-hydrolyzing acid amidase [Anas platyrhynchos]
ENSAPLG00020017948	129.966	339.833	1.38669	3.81e-11	1.11e-09	EHD3	XP_005022023.3 EH domain-containing protein 3 [Anas platyrhynchos]
ENSAPLG00020010138	50.2597	154.907	1.62393	3.82e-11	1.11e-09	CCT7	XP_027311654.1 LOW QUALITY PROTEIN: T-complex protein 1 subunit eta [Anas platyrhynchos]
ENSAPLG00020015161	6.24633	0.408667	-3.93401	3.93e-11	1.14e-09	BICC1	XP_027319040.1 protein bicaudal C homolog 1 isoform X1 [Anas platyrhynchos]
ENSAPLG00020009625	43.044	130.255	1.59745	3.94e-11	1.14e-09	TDRD7	XP_027302140.2 tudor domain-containing protein 7 isoform X1 [Anas platyrhynchos]
ENSAPLG00020008420	56.6637	199.169	1.8135	4.05e-11	1.17e-09	CD40	XP_027298752.1 tumor necrosis factor receptor superfamily member 5 [Anas platyrhynchos]
ENSAPLG00020004431	1.74667	28.776	4.04219	4.14e-11	1.2e-09	Cpn2	XP_038043522.1 platelet glycoprotein Ib beta chain [Anas platyrhynchos]
MSTRG.18288	0.312667	3.77567	3.59403	4.22e-11	1.22e-09	HEG1	XP_027316759.2 taxid=8839 protein HEG homolog 1 isoform X2 [Anas platyrhynchos]
ENSAPLG00020008067	9.419	32.966	1.80733	4.25e-11	1.22e-09	CD86	XP_038029006.1 T-lymphocyte activation antigen CD86 isoform X1 [Anas platyrhynchos]
ENSAPLG00020001692	239.482	76.696	-1.6427	4.33e-11	1.25e-09	EPS15	XP_027318295.1 epidermal growth factor receptor substrate 15 isoform X2 [Anas platyrhynchos]
ENSAPLG00020001445	9.55567	39.4297	2.04485	4.46e-11	1.28e-09	Uck2	XP_027751722.1 uridine-cytidine kinase 2 [Empidonax traillii]
MSTRG.7522	0.001	9.20667	13.1685	4.46e-11	1.28e-09	--	XP_050567617.1 taxid=8868 LOW QUALITY PROTEIN: growth factor receptor-bound protein 14 [Cygnus atratus]
ENSAPLG00020011501	0.001	7.49833	12.8724	4.6e-11	1.32e-09	MZB1	XP_027324223.1 LOW QUALITY PROTEIN: marginal zone B- and B1-cell-specific protein [Anas platyrhynchos]
ENSAPLG00020010497	571.481	96.8857	-2.56035	4.69e-11	1.34e-09	MGLL	XP_005011911.1 monoglyceride lipase isoform X2 [Anas platyrhynchos]
ENSAPLG00020008392	11.1513	57.9673	2.37802	4.71e-11	1.34e-09	BAMBI	XP_012948869.3 BMP and activin membrane-bound inhibitor homolog [Anas platyrhynchos]
ENSAPLG00020000120	61.7543	16.5013	-1.90396	4.77e-11	1.36e-09	Lpcat1	XP_038029579.1 lysophosphatidylcholine acyltransferase 1 [Anas platyrhynchos]
ENSAPLG00020014300	23.017	3.756	-2.61543	4.86e-11	1.38e-09	MRC2	XP_027301078.1 LOW QUALITY PROTEIN: C-type mannose receptor 2 [Anas platyrhynchos]
ENSAPLG00020014550	0.001	8.192	13	5.12e-11	1.45e-09	UBE2R2	XP_038025574.1 ubiquitin-conjugating enzyme E2 R2-like isoform X1 [Anas platyrhynchos]
ENSAPLG00020015887	61.3607	13.27	-2.20915	5.39e-11	1.52e-09	Mapk11	PKU48192.1 mitogen-activated protein kinase 11 [Limosa lapponica baueri]
ENSAPLG00020011713	23.305	4.67367	-2.31801	5.61e-11	1.58e-09	SCFD2	XP_027312883.1 sec1 family domain-containing protein 2 [Anas platyrhynchos]
ENSAPLG00020003282	15.331	2.46667	-2.63582	5.97e-11	1.68e-09	ATP8B1	XP_027302969.1 phospholipid-transporting ATPase IC [Anas platyrhynchos]
MSTRG.11335	3.574	14.003	1.97012	6.05e-11	1.7e-09	--	EOA97245.1 taxid=8839 hypothetical protein Anapl_10831 [Anas platyrhynchos]
ENSAPLG00020016821	57.5323	16.0687	-1.84012	6.3e-11	1.77e-09	MBOAT1	XP_027307023.1 lysophospholipid acyltransferase 1 isoform X2 [Anas platyrhynchos]
ENSAPLG00020002025	122.32	33.884	-1.85198	6.35e-11	1.78e-09	ABCB10	EOB00838.1 ATP-binding cassette sub-family B member 10, mitochondrial, partial [Anas platyrhynchos]
ENSAPLG00020016577	1.53267	7.369	2.26542	6.37e-11	1.78e-09	AHNAK2	XP_038036398.1 protein AHNAK2 isoform X2 [Anas platyrhynchos]
ENSAPLG00020015317	0.0823333	2.142	4.70134	7.15e-11	2e-09	DSCAML1	XP_027299963.2 LOW QUALITY PROTEIN: Down syndrome cell adhesion molecule-like protein 1 [Anas platyrhynchos]
ENSAPLG00020010378	3.11133	19.6147	2.65633	7.42e-11	2.06e-09	PLCB4	XP_012964384.1 1-phosphatidylinositol 4,5-bisphosphate phosphodiesterase beta-4 isoform X2 [Anas platyrhynchos]
ENSAPLG00020014800	72.1453	23.3637	-1.62664	7.76e-11	2.16e-09	GPD1L	XP_027306903.1 glycerol-3-phosphate dehydrogenase 1-like protein [Anas platyrhynchos]
ENSAPLG00020002557	0.001	3.30867	11.692	8.14e-11	2.26e-09	CHD1	XP_038025314.1 chromodomain-helicase-DNA-binding protein 1 isoform X1 [Anas platyrhynchos]
ENSAPLG00020009531	20.8587	4.286	-2.28294	8.38e-11	2.32e-09	CCDC125	XP_038025750.1 coiled-coil domain-containing protein 125 [Anas platyrhynchos]
ENSAPLG00020005128	4.42067	30.4763	2.78535	8.44e-11	2.33e-09	PDLIM1	XP_032047576.1 PDZ and LIM domain protein 1 [Aythya fuligula]
ENSAPLG00020001207	2.44	13.384	2.45556	8.49e-11	2.34e-09	ENPP2	XP_035173556.1 ectonucleotide pyrophosphatase/phosphodiesterase family member 2 isoform X2 [Oxyura jamaicensis]
ENSAPLG00020016238	15.065	59.67	1.98581	8.56e-11	2.36e-09	NUGGC	XP_032040415.1 nuclear GTPase SLIP-GC-like [Aythya fuligula]
ENSAPLG00020004177	33.7513	130.37	1.9496	8.7e-11	2.39e-09	CDKN1A	XP_038024143.1 cyclin-dependent kinase inhibitor 1 [Anas platyrhynchos]
ENSAPLG00020003905	4.85633	20.463	2.07508	8.81e-11	2.42e-09	TRPC3	XP_035181097.1 short transient receptor potential channel 3 isoform X1 [Oxyura jamaicensis]
ENSAPLG00020016522	8.77633	40.955	2.22235	8.87e-11	2.43e-09	btbd6	XP_025944438.1 BTB/POZ domain-containing protein 6 [Apteryx rowi]
ENSAPLG00020003625	85.521	24.311	-1.81467	9.05e-11	2.47e-09	SLC44A1	XP_038025980.1 choline transporter-like protein 1 [Anas platyrhynchos]
ENSAPLG00020000210	0.586	11.3783	4.27924	9.65e-11	2.63e-09	SHROOM2	XP_035398179.1 protein Shroom2 [Cygnus atratus]
ENSAPLG00020010084	4.01733	20.2463	2.33335	9.69e-11	2.63e-09	CDYL2	XP_027322659.1 chromodomain Y-like protein 2 [Anas platyrhynchos]
ENSAPLG00020012129	158.519	781.012	2.30069	9.71e-11	2.63e-09	Plek	XP_005025221.1 pleckstrin [Anas platyrhynchos]
MSTRG.11456	17.8273	57.727	1.69516	9.71e-11	2.63e-09	--	XP_027301318.2 taxid=8839 uncharacterized protein LOC101790937 [Anas platyrhynchos]
ENSAPLG00020000006	55.8167	13.733	-2.02305	9.72e-11	2.63e-09	MAOA	XP_027304796.1 amine oxidase [flavin-containing] A [Anas platyrhynchos]
ENSAPLG00020002464	0.144667	7.051	5.60702	9.81e-11	2.65e-09	Mcam	XP_027300210.2 LOW QUALITY PROTEIN: cell surface glycoprotein MUC18 [Anas platyrhynchos]
ENSAPLG00020004828	0.336667	4.676	3.79588	1.01e-10	2.73e-09	Ptprq	XP_038027124.1 interleukin-31 receptor subunit alpha isoform X1 [Anas platyrhynchos]
ENSAPLG00020001024	16.613	47.2027	1.50656	1.02e-10	2.75e-09	TUBGCP5	XP_038029103.1 gamma-tubulin complex component 5 isoform X1 [Anas platyrhynchos]
ENSAPLG00020014317	71.7437	264.916	1.88461	1.05e-10	2.82e-09	ALDH1A3	XP_005011147.2 aldehyde dehydrogenase family 1 member A3 [Anas platyrhynchos]
ENSAPLG00020010931	46.8217	212.986	2.18551	1.05e-10	2.82e-09	--	XP_027304463.1 uncharacterized protein LOC113841983 [Anas platyrhynchos]
ENSAPLG00020002749	1.34767	16.457	3.61017	1.1e-10	2.95e-09	EMB	XP_038026635.1 embigin isoform X2 [Anas platyrhynchos]
ENSAPLG00020006391	5.57667	32.1563	2.52763	1.17e-10	3.12e-09	PIK3IP1	XP_027325849.2 phosphoinositide-3-kinase-interacting protein 1 [Anas platyrhynchos]
ENSAPLG00020015965	0.283	6.20167	4.45378	1.17e-10	3.13e-09	VCAM1	XP_005018814.3 vascular cell adhesion protein 1 isoform X2 [Anas platyrhynchos]
ENSAPLG00020007665	0.869	7.05633	3.02149	1.23e-10	3.28e-09	SLK	XP_038027828.1 STE20-like serine/threonine-protein kinase [Anas platyrhynchos]
ENSAPLG00020004038	0.419667	6.2	3.88495	1.24e-10	3.3e-09	GFI1B	XP_005013314.2 zinc finger protein Gfi-1b [Anas platyrhynchos]
ENSAPLG00020017945	270.202	87.0453	-1.6342	1.26e-10	3.34e-09	HTRA1	XP_012956555.2 serine protease HTRA1 [Anas platyrhynchos]
MSTRG.11777	0.519333	11.875	4.51512	1.26e-10	3.34e-09	--	XP_027300670.2 taxid=8839 regulator of hemoglobinization and erythroid cell expansion protein [Anas platyrhynchos]
ENSAPLG00020015123	0.001	4.17833	12.0287	1.36e-10	3.6e-09	UBQLN1	XP_027304074.1 ubiquilin-1-like isoform X1 [Anas platyrhynchos]
ENSAPLG00020003353	57.152	14.208	-2.0081	1.36e-10	3.6e-09	TMEM192	XP_027312262.1 transmembrane protein 192 isoform X1 [Anas platyrhynchos]
ENSAPLG00020003705	1.07267	12.714	3.56714	1.36e-10	3.6e-09	ZP1	XP_038036074.1 LOW QUALITY PROTEIN: zona pellucida sperm-binding protein 1 [Anas platyrhynchos]
ENSAPLG00020001319	65.3567	191.734	1.5527	1.37e-10	3.61e-09	EXT1	XP_032037612.1 exostosin-1 [Aythya fuligula]
MSTRG.18637	0.001	10.9207	13.4148	1.49e-10	3.91e-09	--	-
ENSAPLG00020001341	0.144667	123.945	9.74275	1.51e-10	3.97e-09	SELE	XP_027319388.2 LOW QUALITY PROTEIN: E-selectin [Anas platyrhynchos]
ENSAPLG00020015931	0.156333	12.2607	6.29327	1.53e-10	3.99e-09	F2RL3	XP_012963621.3 proteinase-activated receptor 4 [Anas platyrhynchos]
ENSAPLG00020017492	3.812	16.7767	2.13784	1.68e-10	4.4e-09	MOB3C	EOA95820.1 Mps one binder kinase activator-like 2C, partial [Anas platyrhynchos]
ENSAPLG00020016093	1.69967	15.1013	3.15135	1.78e-10	4.63e-09	LAT2	EOA95839.1 Linker for activation of T-cells family member 2 [Anas platyrhynchos]
ENSAPLG00020001581	2.149	15.5713	2.85716	1.82e-10	4.74e-09	ZP1	XP_038036074.1 LOW QUALITY PROTEIN: zona pellucida sperm-binding protein 1 [Anas platyrhynchos]
ENSAPLG00020011040	6.625	26.1547	1.98108	1.83e-10	4.77e-09	RUBCN	XP_032049658.1 run domain Beclin-1-interacting and cysteine-rich domain-containing protein isoform X3 [Aythya fuligula]
ENSAPLG00020014586	0.001	3.828	11.9024	1.84e-10	4.77e-09	Dnajb5	XP_038025451.1 dnaJ homolog subfamily B member 5-like isoform X1 [Anas platyrhynchos]
ENSAPLG00020007072	9.27233	71.864	2.95426	1.95e-10	5.06e-09	MCOLN3	XP_038038537.1 mucolipin-3 isoform X1 [Anas platyrhynchos]
ENSAPLG00020013786	7.834	39.8683	2.34742	1.96e-10	5.07e-09	Itm2c	XP_027320120.1 integral membrane protein 2C isoform X2 [Anas platyrhynchos]
ENSAPLG00020009106	0.300333	12.1347	5.33643	1.99e-10	5.14e-09	WNT4	NP_990114.1 protein Wnt-4 precursor [Gallus gallus]
ENSAPLG00020004567	0.991	8.67267	3.12952	2e-10	5.16e-09	tlcd2	XP_027327932.1 TLC domain-containing protein 2 [Anas platyrhynchos]
ENSAPLG00020011779	119.372	38.5333	-1.63129	2.01e-10	5.16e-09	ARHGAP15	XP_038037966.1 rho GTPase-activating protein 15 isoform X1 [Anas platyrhynchos]
ENSAPLG00020014565	2.04967	12.0477	2.55529	2.03e-10	5.22e-09	Ubap1	XP_038025607.1 ubiquitin-associated protein 1-like isoform X2 [Anas platyrhynchos]
MSTRG.9620	0.617667	7.864	3.67036	2.12e-10	5.43e-09	--	NWZ30868.1 taxid=75869 SETBP protein [Asarcornis scutulata]
ENSAPLG00020010154	78.3423	266.383	1.76564	2.13e-10	5.46e-09	NAT1	XP_005020218.1 arylamine N-acetyltransferase, pineal gland isozyme NAT-3 [Anas platyrhynchos]
ENSAPLG00020017158	24.136	91.0627	1.91567	2.22e-10	5.68e-09	Plk3	XP_038039168.1 serine/threonine-protein kinase PLK3 isoform X2 [Anas platyrhynchos]
ENSAPLG00020013198	74.5137	23.3997	-1.67102	2.27e-10	5.79e-09	RFTN2	XP_005021939.3 raftlin-2 isoform X1 [Anas platyrhynchos]
ENSAPLG00020014544	6.451	31.2777	2.27754	2.31e-10	5.89e-09	HIVEP3	XP_012951151.1 transcription factor HIVEP3 isoform X1 [Anas platyrhynchos]
ENSAPLG00020003935	75.9673	21.6637	-1.8101	2.43e-10	6.18e-09	RGS9	XP_027327219.2 regulator of G-protein signaling 9 isoform X1 [Anas platyrhynchos]
ENSAPLG00020006300	0.640333	8.25333	3.68808	2.44e-10	6.19e-09	ARHGAP8	XP_038029304.1 rho GTPase-activating protein 8 isoform X2 [Anas platyrhynchos]
ENSAPLG00020018187	208.69	73.339	-1.50871	2.44e-10	6.19e-09	ACLY	XP_027300986.1 ATP-citrate synthase isoform X1 [Anas platyrhynchos]
ENSAPLG00020017320	19.5187	4.98067	-1.97044	2.45e-10	6.19e-09	Ccnj	XP_032047557.1 cyclin-J [Aythya fuligula]
ENSAPLG00020000352	0.001	5.36167	12.3885	2.48e-10	6.25e-09	Serpinb5	XP_032037925.1 serpin B5 [Aythya fuligula]
ENSAPLG00020003979	131.127	28.6443	-2.19464	2.48e-10	6.26e-09	LAPTM4B	XP_035402021.1 lysosomal-associated transmembrane protein 4B [Cygnus atratus]
ENSAPLG00020017886	0.220333	8.363	5.24626	2.5e-10	6.29e-09	CTBP2	XP_005048900.1 PREDICTED: C-terminal-binding protein 2 isoform X2 [Ficedula albicollis]
ENSAPLG00020010988	4.296	0.360333	-3.57559	2.52e-10	6.33e-09	XDH	XP_032040149.1 xanthine dehydrogenase/oxidase isoform X2 [Aythya fuligula]
ENSAPLG00020004550	0.325	52.8487	7.34528	2.55e-10	6.39e-09	Plac8	XP_012949338.1 LOW QUALITY PROTEIN: placenta-specific gene 8 protein [Anas platyrhynchos]
MSTRG.19447	1.38	17.0423	3.62638	2.61e-10	6.54e-09	--	EOB01570.1 taxid=8839 hypothetical protein Anapl_05622 [Anas platyrhynchos]
ENSAPLG00020010081	41.9967	115.96	1.46528	2.64e-10	6.6e-09	ERRFI1	XP_012959400.3 ERBB receptor feedback inhibitor 1 [Anas platyrhynchos]
MSTRG.7468	31	12.1283	-1.35389	2.64e-10	6.6e-09	Mtch1	XP_038020838.1 taxid=8839 mitochondrial carrier homolog 1-like isoform X1 [Anas platyrhynchos]
ENSAPLG00020009305	538.386	1804.57	1.74494	2.71e-10	6.75e-09	IFI35	XP_038024700.1 LOW QUALITY PROTEIN: interferon-induced 35 kDa protein [Anas platyrhynchos]
ENSAPLG00020012678	34.437	10.6493	-1.6932	2.79e-10	6.93e-09	L3MBTL3	XP_027299610.1 lethal(3)malignant brain tumor-like protein 4 isoform X2 [Anas platyrhynchos]
ENSAPLG00020001851	0.0366667	5.25767	7.16381	2.94e-10	7.3e-09	B4GALNT4	XP_027314165.1 N-acetyl-beta-glucosaminyl-glycoprotein 4-beta-N-acetylgalactosaminyltransferase 1 isoform X1 [Anas platyrhynchos]
ENSAPLG00020009256	58.296	16.3433	-1.83469	3.12e-10	7.73e-09	CTNNAL1	XP_038031655.1 alpha-catulin [Anas platyrhynchos]
ENSAPLG00020013768	73.273	23.925	-1.61476	3.23e-10	8e-09	Pctp	XP_027327224.2 phosphatidylcholine transfer protein isoform X1 [Anas platyrhynchos]
ENSAPLG00020016608	110.631	342.186	1.62903	3.32e-10	8.2e-09	RIPK2	XP_005025777.2 receptor-interacting serine/threonine-protein kinase 2 isoform X1 [Anas platyrhynchos]
ENSAPLG00020014653	784.409	221.97	-1.82124	3.35e-10	8.26e-09	NCOA4	XP_027316461.1 nuclear receptor coactivator 4 isoform X1 [Anas platyrhynchos]
ENSAPLG00020006990	286.06	89.8627	-1.67053	3.36e-10	8.27e-09	MAN2B2	EOA93248.1 Epididymis-specific alpha-mannosidase, partial [Anas platyrhynchos]
ENSAPLG00020014839	4.60467	17.5453	1.92992	3.54e-10	8.7e-09	CGAS	XP_027310983.2 cyclic GMP-AMP synthase [Anas platyrhynchos]
ENSAPLG00020000630	614.727	193.748	-1.66576	3.61e-10	8.87e-09	PRCP	XP_005026125.3 lysosomal Pro-X carboxypeptidase [Anas platyrhynchos]
ENSAPLG00020017322	37.2453	9.42533	-1.98244	3.67e-10	9.01e-09	Dusp11	XP_027315947.2 uncharacterized protein LOC101797887 isoform X1 [Anas platyrhynchos]
ENSAPLG00020006558	3.14067	55.6193	4.14644	3.7e-10	9.07e-09	S100A4	XP_013056743.1 PREDICTED: protein S100-A4-like [Anser cygnoides domesticus]
ENSAPLG00020012302	7.71	51.668	2.74447	3.86e-10	9.42e-09	Slbp	XP_027311500.1 histone RNA hairpin-binding protein isoform X3 [Anas platyrhynchos]
ENSAPLG00020005517	71.8717	21.4587	-1.74386	3.89e-10	9.48e-09	B4GALT5	XP_032054152.1 beta-1,4-galactosyltransferase 5 [Aythya fuligula]
MSTRG.13173	0.0173333	6.789	8.61351	4.03e-10	9.82e-09	--	EOB02547.1 taxid=8839 hypothetical protein Anapl_11608 [Anas platyrhynchos]
ENSAPLG00020000621	6.24667	255.982	5.35681	4.05e-10	9.85e-09	Mas1	XP_038036565.1 proto-oncogene Mas isoform X1 [Anas platyrhynchos]
ENSAPLG00020016726	2.95267	18.0653	2.61313	4.15e-10	1.01e-08	FA2H	XP_032051396.1 fatty acid 2-hydroxylase [Aythya fuligula]
ENSAPLG00020009196	171.864	499.178	1.53829	4.27e-10	1.04e-08	MCL1	XP_032060512.1 induced myeloid leukemia cell differentiation protein Mcl-1 [Aythya fuligula]
ENSAPLG00020011024	0.001	5.00367	12.2888	4.35e-10	1.05e-08	GPBP1	XP_027303574.2 vasculin isoform X1 [Anas platyrhynchos]
ENSAPLG00020003734	0.433333	7.17033	4.04849	4.53e-10	1.1e-08	GALNT9	XP_013028922.1 PREDICTED: polypeptide N-acetylgalactosaminyltransferase 9 isoform X3 [Anser cygnoides domesticus]
ENSAPLG00020016126	0.514667	11.978	4.5406	4.68e-10	1.13e-08	GCNT7	XP_005010467.2 beta-1,3-galactosyl-O-glycosyl-glycoprotein beta-1,6-N-acetylglucosaminyltransferase 7 [Anas platyrhynchos]
MSTRG.6042	2.513	13.3737	2.41191	4.84e-10	1.17e-08	NLRC3	AFP44851.1 taxid=8839 NLRC3 protein [Anas platyrhynchos]
ENSAPLG00020001177	45.249	146.966	1.69952	4.89e-10	1.18e-08	PHF11	XP_038034679.1 histone-lysine N-methyltransferase SETDB2 [Anas platyrhynchos]
ENSAPLG00020017779	0.138333	3.399	4.61889	4.94e-10	1.19e-08	DGKD	XP_015133851.2 diacylglycerol kinase delta isoform X4 [Gallus gallus]
ENSAPLG00020001141	0.001	5.576	12.445	5.07e-10	1.21e-08	TMEM26	XP_005015644.2 transmembrane protein 26 [Anas platyrhynchos]
ENSAPLG00020004037	12.1147	51.316	2.08265	5.12e-10	1.23e-08	ENDOD1	EOB06276.1 Endonuclease domain-containing 1 protein, partial [Anas platyrhynchos]
ENSAPLG00020018031	0.001	3.56833	11.801	5.2e-10	1.24e-08	ITGB6	XP_012961737.1 integrin beta-6 isoform X1 [Anas platyrhynchos]
ENSAPLG00020016108	255.488	90.5577	-1.49634	5.23e-10	1.25e-08	EDEM1	XP_038041634.1 ER degradation-enhancing alpha-mannosidase-like protein 1 [Anas platyrhynchos]
ENSAPLG00020001074	0.156333	7.03667	5.49219	5.29e-10	1.26e-08	Upp1	XP_005029385.1 uridine phosphorylase 1 isoform X2 [Anas platyrhynchos]
ENSAPLG00020004391	35.5633	10.5687	-1.7506	5.34e-10	1.27e-08	B3GLCT	XP_027325811.2 beta-1,3-glucosyltransferase isoform X1 [Anas platyrhynchos]
ENSAPLG00020006356	2.198	12.1187	2.46297	5.38e-10	1.28e-08	L3MBTL3	XP_038032679.1 lethal(3)malignant brain tumor-like protein 3 isoform X4 [Anas platyrhynchos]
MSTRG.5017	0.001	2.68033	11.3882	5.55e-10	1.32e-08	--	XP_005030979.3 taxid=8839 fractalkine [Anas platyrhynchos]
ENSAPLG00020000222	0.670667	9.46033	3.81822	5.61e-10	1.33e-08	SHROOM2	XP_027303382.2 LOW QUALITY PROTEIN: protein Shroom2 [Anas platyrhynchos]
ENSAPLG00020006047	0.112667	5.51067	5.61209	5.63e-10	1.33e-08	GEM	XP_005030168.1 GTP-binding protein GEM [Anas platyrhynchos]
ENSAPLG00020002543	28.6247	7.25533	-1.98015	5.65e-10	1.33e-08	OPHN1	XP_038039948.1 oligophrenin-1 isoform X2 [Anas platyrhynchos]
MSTRG.12677	15.0267	65.3997	2.12176	5.71e-10	1.35e-08	--	EOB04958.1 taxid=8839 hypothetical protein Anapl_03341, partial [Anas platyrhynchos]
ENSAPLG00020015386	0.346333	27.121	6.29111	5.89e-10	1.39e-08	--	XP_027318448.1 tumor necrosis factor ligand superfamily member 4 [Anas platyrhynchos]
ENSAPLG00020012062	0.626333	7.167	3.51637	6.31e-10	1.48e-08	CLDN1	XP_012964010.3 claudin-1 [Anas platyrhynchos]
ENSAPLG00020010608	0.239667	10.823	5.49693	6.34e-10	1.49e-08	TRIM27	EOB02159.1 Zinc finger protein RFP [Anas platyrhynchos]
ENSAPLG00020014921	0.732667	8.07933	3.46301	6.35e-10	1.49e-08	CREB3L1	XP_027315064.1 cyclic AMP-responsive element-binding protein 3-like protein 1 isoform X1 [Anas platyrhynchos]
ENSAPLG00020008689	110.738	334.033	1.59284	6.52e-10	1.52e-08	ATF3	OPJ72303.1 cyclic AMP-dependent transcription factor ATF-3 [Patagioenas fasciata monilis]
ENSAPLG00020009387	2.208	22.0513	3.32005	6.57e-10	1.53e-08	CYGB	KQK80235.1 cytoglobin [Amazona aestiva]
ENSAPLG00020001952	429.326	130.579	-1.71715	6.71e-10	1.56e-08	Slc26a5	XP_027315248.1 prestin [Anas platyrhynchos]
ENSAPLG00020014736	0.001	3.63233	11.8267	6.72e-10	1.56e-08	HMCN2	XP_032062987.1 intercellular adhesion molecule 5 [Aythya fuligula]
ENSAPLG00020004239	45.74	12.1853	-1.90831	6.95e-10	1.61e-08	MAP3K21	XP_035415026.1 mitogen-activated protein kinase kinase kinase 21 [Cygnus atratus]
ENSAPLG00020011639	0.246	13.1073	5.73557	6.95e-10	1.61e-08	Cr2	XP_038024478.1 complement receptor type 1 [Anas platyrhynchos]
ENSAPLG00020007768	38.7897	113.308	1.54651	7.1e-10	1.64e-08	TOR1B	XP_027326992.2 torsin-1B [Anas platyrhynchos]
ENSAPLG00020014401	0.001	2.00367	10.9684	7.32e-10	1.69e-08	C5	XP_027326463.2 complement C5 [Anas platyrhynchos]
ENSAPLG00020010529	2.77433	19.0093	2.77649	7.33e-10	1.69e-08	ADA	XP_027328703.1 adenosine deaminase [Anas platyrhynchos]
ENSAPLG00020008064	7.45	35.7533	2.26277	7.35e-10	1.69e-08	ITGA6	XP_027318069.1 integrin alpha-6 isoform X2 [Anas platyrhynchos]
ENSAPLG00020011697	1.58	7.66267	2.27792	7.41e-10	1.71e-08	GIMAP2	XP_038030387.1 GTPase IMAP family member 8-like isoform X3 [Anas platyrhynchos]
ENSAPLG00020003633	81.27	405.013	2.31717	7.77e-10	1.79e-08	ZFAND2B	XP_032053509.1 AN1-type zinc finger protein 2A isoform X2 [Aythya fuligula]
ENSAPLG00020000146	0.168	7.702	5.5187	7.83e-10	1.8e-08	DIPK2B	XP_032063293.1 divergent protein kinase domain 2B [Aythya fuligula]
ENSAPLG00020000201	11.432	1.228	-3.2187	7.98e-10	1.83e-08	MRC1	XP_027306474.2 macrophage mannose receptor 1 isoform X1 [Anas platyrhynchos]
ENSAPLG00020011444	32.4057	7.483	-2.11456	8.41e-10	1.92e-08	PFKFB2	XP_027300564.2 6-phosphofructo-2-kinase/fructose-2,6-bisphosphatase 2 isoform X4 [Anas platyrhynchos]
ENSAPLG00020010553	57.3327	18.0317	-1.66882	8.63e-10	1.97e-08	CBLB	XP_027305319.1 E3 ubiquitin-protein ligase CBL-B isoform X1 [Anas platyrhynchos]
MSTRG.11373	2.309	24.3517	3.39868	8.74e-10	1.99e-08	--	EOA94108.1 taxid=8839 hypothetical protein Anapl_17196 [Anas platyrhynchos]
ENSAPLG00020008543	14.5563	58.7907	2.01394	8.75e-10	1.99e-08	MIF4GD	XP_027327431.1 MIF4G domain-containing protein [Anas platyrhynchos]
MSTRG.12520	0.111	4.092	5.20417	8.87e-10	2.02e-08	ANKRD24	XP_038024976.1 taxid=8839 ankyrin repeat domain-containing protein 24 isoform X5 [Anas platyrhynchos]
ENSAPLG00020007625	0.001	177.528	17.4377	8.89e-10	2.02e-08	--	NP_001297723.1 C-C motif chemokine 19 precursor [Anas platyrhynchos]
ENSAPLG00020007477	13.5607	54.4443	2.00535	9.11e-10	2.07e-08	PLA2G6	XP_038024887.1 LOW QUALITY PROTEIN: 85/88 kDa calcium-independent phospholipase A2 [Anas platyrhynchos]
ENSAPLG00020002015	54.4007	17.5537	-1.63185	9.46e-10	2.14e-08	Spart	EOB02126.1 Spartin, partial [Anas platyrhynchos]
ENSAPLG00020009494	0.131667	4.72167	5.16433	9.6e-10	2.17e-08	OSMR	XP_038025861.1 oncostatin-M-specific receptor subunit beta isoform X1 [Anas platyrhynchos]
ENSAPLG00020005916	9.056	41.7393	2.20446	9.65e-10	2.18e-08	Atp6v1g3	XP_005027367.1 V-type proton ATPase subunit G 3 [Anas platyrhynchos]
ENSAPLG00020007730	66.994	246.354	1.87863	9.95e-10	2.24e-08	LMNA	XP_005021763.3 LOW QUALITY PROTEIN: lamin [Anas platyrhynchos]
MSTRG.20787	20.322	83.1113	2.032	9.96e-10	2.24e-08	--	EOA93195.1 taxid=8839 Nuclear RNA export factor 1, partial [Anas platyrhynchos]
ENSAPLG00020012896	0.049	10.9987	7.81033	1e-09	2.25e-08	CD93	XP_038031863.1 LOW QUALITY PROTEIN: thrombomodulin [Anas platyrhynchos]
ENSAPLG00020016030	0.447667	7.03367	3.97378	1.04e-09	2.32e-08	RIPOR3	XP_012961166.2 RIPOR family member 3 isoform X1 [Anas platyrhynchos]
ENSAPLG00020001479	253.879	82.667	-1.61876	1.08e-09	2.42e-08	VPS39	XP_032044656.1 vam6/Vps39-like protein isoform X1 [Aythya fuligula]
ENSAPLG00020012477	21.0703	4.09233	-2.36422	1.11e-09	2.48e-08	PM20D2	XP_027310711.1 peptidase M20 domain-containing protein 2 [Anas platyrhynchos]
ENSAPLG00020015883	53.429	12.3103	-2.11775	1.12e-09	2.5e-08	hdac10	XP_012956263.3 polyamine deacetylase HDAC10 isoform X1 [Anas platyrhynchos]
ENSAPLG00020003332	1.54967	10.654	2.78137	1.13e-09	2.51e-08	CGN	XP_032060231.1 cingulin [Aythya fuligula]
ENSAPLG00020015644	4.18133	18.591	2.15257	1.14e-09	2.53e-08	DENND2D	XP_035745643.1 DENN domain-containing protein 2D isoform X1 [Egretta garzetta]
MSTRG.15228	0.001	17.2247	14.0722	1.16e-09	2.58e-08	--	XP_038028680.1 taxid=8839 deleted in malignant brain tumors 1 protein-like isoform X3 [Anas platyrhynchos]
ENSAPLG00020000845	25.4927	6.848	-1.89633	1.19e-09	2.65e-08	KIF13B	XP_027311214.1 kinesin-like protein KIF13B isoform X4 [Anas platyrhynchos]
ENSAPLG00020009233	7.35367	40.745	2.47009	1.21e-09	2.68e-08	Rai14	XP_027302037.1 ankycorbin isoform X1 [Anas platyrhynchos]
ENSAPLG00020003513	61.845	172.486	1.47975	1.25e-09	2.78e-08	TUBA1C	XP_032060813.1 tubulin alpha-1C chain-like isoform X1 [Aythya fuligula]
ENSAPLG00020003959	22.7027	77.6093	1.77337	1.26e-09	2.78e-08	RALGDS	XP_027326391.2 ral guanine nucleotide dissociation stimulator isoform X1 [Anas platyrhynchos]
ENSAPLG00020012083	96.8887	32.0763	-1.59482	1.28e-09	2.81e-08	CCDC50	XP_027319704.2 coiled-coil domain-containing protein 50 isoform X1 [Anas platyrhynchos]
MSTRG.819	0.02	4.74433	7.89006	1.29e-09	2.84e-08	--	-
ENSAPLG00020005531	19.5427	3.37967	-2.53167	1.32e-09	2.9e-08	SLC34A1	XP_038042499.1 sodium-dependent phosphate transport protein 2A isoform X1 [Anas platyrhynchos]
ENSAPLG00020000448	612.911	224.318	-1.45013	1.32e-09	2.9e-08	Taldo1	XP_027314415.1 transaldolase [Anas platyrhynchos]
ENSAPLG00020005043	27.9197	8.16733	-1.77334	1.32e-09	2.9e-08	SCUBE2	XP_027317236.2 signal peptide, CUB and EGF-like domain-containing protein 2 isoform X1 [Anas platyrhynchos]
ENSAPLG00020006846	88.628	301.475	1.7662	1.33e-09	2.92e-08	CCR5	EOB03431.1 C-C chemokine receptor type 5, partial [Anas platyrhynchos]
ENSAPLG00020010804	1099.68	348.143	-1.65933	1.34e-09	2.93e-08	GNS	XP_005029513.4 N-acetylglucosamine-6-sulfatase [Anas platyrhynchos]
MSTRG.4680	1.50967	7.96867	2.40011	1.36e-09	2.97e-08	--	EOB07487.1 taxid=8839 hypothetical protein Anapl_01987 [Anas platyrhynchos]
MSTRG.3054	10.0463	2.681	-1.90583	1.37e-09	2.98e-08	ARHGAP42	KFO92471.1 taxid=175836 Rho GTPase-activating protein 42, partial [Buceros rhinoceros silvestris]
ENSAPLG00020014274	82.8577	287.35	1.7941	1.37e-09	2.98e-08	PLAU	XP_005015758.1 urokinase-type plasminogen activator isoform X2 [Anas platyrhynchos]
MSTRG.13884	0.130333	2.73767	4.39267	1.38e-09	2.99e-08	--	KAJ7413535.1 taxid=371930 hypothetical protein BTVI_43230 [Pitangus sulphuratus]
ENSAPLG00020001495	5.76033	20.5723	1.83648	1.4e-09	3.03e-08	PATL1	XP_027314266.2 LOW QUALITY PROTEIN: protein PAT1 homolog 1 [Anas platyrhynchos]
ENSAPLG00020006438	173.761	62.8027	-1.4682	1.4e-09	3.03e-08	GOT1	XP_027316535.1 aspartate aminotransferase, cytoplasmic [Anas platyrhynchos]
MSTRG.129	0.172	6.73967	5.2922	1.4e-09	3.03e-08	--	KAI6074267.1 taxid=8832 Rna-directed dna polymerase from mobile element jockey-like [Aix galericulata]
ENSAPLG00020005411	131.143	38.449	-1.77012	1.42e-09	3.07e-08	NXPE3	EOB08541.1 Protein FAM55C, partial [Anas platyrhynchos]
MSTRG.14682	13.2713	67.801	2.35299	1.45e-09	3.14e-08	TRIM11	XP_032061027.1 taxid=219594 E3 ubiquitin-protein ligase TRIM58-like [Aythya fuligula]
ENSAPLG00020005349	75.6353	21.2793	-1.82961	1.54e-09	3.32e-08	SERINC5	XP_038026005.1 serine incorporator 5 isoform X2 [Anas platyrhynchos]
ENSAPLG00020012709	160.987	54.8687	-1.55289	1.55e-09	3.33e-08	CLN8	XP_027310923.1 protein CLN8 [Anas platyrhynchos]
ENSAPLG00020014917	90.1157	341.386	1.92155	1.66e-09	3.56e-08	JUND	XP_027328223.2 transcription factor jun-D [Anas platyrhynchos]
MSTRG.20577	0.031	3.40667	6.77995	1.67e-09	3.58e-08	--	XP_035170584.1 taxid=8884 uncharacterized protein LOC118160155 isoform X2 [Oxyura jamaicensis]
ENSAPLG00020000745	3.891	15.1163	1.9579	1.68e-09	3.61e-08	SLC37A1	XP_038028794.1 glucose-6-phosphate exchanger SLC37A1 isoform X2 [Anas platyrhynchos]
ENSAPLG00020013779	2	23.9187	3.58007	1.69e-09	3.61e-08	GPR35	XP_005028657.2 G-protein coupled receptor 35 [Anas platyrhynchos]
ENSAPLG00020004373	146.499	27.445	-2.41628	1.74e-09	3.72e-08	HEBP1	XP_027309146.1 heme-binding protein 1 [Anas platyrhynchos]
ENSAPLG00020008607	76.8177	200.133	1.38145	1.79e-09	3.81e-08	CMTR1	XP_038032627.1 cap-specific mRNA (nucleoside-2'-O-)-methyltransferase 1 [Anas platyrhynchos]
ENSAPLG00020009319	90.449	31.5483	-1.51954	1.8e-09	3.83e-08	TLE4	XP_013051407.1 PREDICTED: transducin-like enhancer protein 4 isoform X2 [Anser cygnoides domesticus]
ENSAPLG00020005315	18.0653	67.581	1.90339	1.81e-09	3.84e-08	PTGS2	XP_032048204.1 prostaglandin G/H synthase 2 [Aythya fuligula]
MSTRG.18635	0.001	2.514	11.2958	1.88e-09	3.98e-08	--	EOB05108.1 taxid=8839 hypothetical protein Anapl_03531 [Anas platyrhynchos]
ENSAPLG00020009001	0.001	0.948333	9.88925	1.88e-09	4e-08	PRUNE2	XP_038026338.1 protein prune homolog 2 isoform X3 [Anas platyrhynchos]
MSTRG.21643	0.017	4.39233	8.01331	1.97e-09	4.17e-08	--	-
ENSAPLG00020012475	108.303	282.218	1.38173	2.01e-09	4.25e-08	PNRC1	XP_032041008.1 proline-rich nuclear receptor coactivator 1 [Aythya fuligula]
ENSAPLG00020001237	4.591	32.169	2.80879	2.01e-09	4.25e-08	kcnrg	XP_005015298.1 potassium channel regulatory protein [Anas platyrhynchos]
ENSAPLG00020008535	44.3337	14.259	-1.63653	2.12e-09	4.48e-08	cybrd1	XP_040418028.1 cytochrome b reductase 1 [Cygnus olor]
ENSAPLG00020017031	323.787	96.7197	-1.74317	2.16e-09	4.55e-08	ALDH3A2	EOA98684.1 Fatty aldehyde dehydrogenase, partial [Anas platyrhynchos]
MSTRG.8746	0.001	6.95467	12.7638	2.18e-09	4.59e-08	--	-
MSTRG.17092	3.075	15.495	2.33314	2.2e-09	4.62e-08	--	-
ENSAPLG00020004740	10.77	54.889	2.3495	2.24e-09	4.7e-08	Dnajb9	XP_032053052.1 dnaJ homolog subfamily B member 9 [Aythya fuligula]
ENSAPLG00020016317	9.26567	35.5443	1.93965	2.26e-09	4.74e-08	ST7	XP_038035860.1 suppressor of tumorigenicity 7 protein isoform X2 [Anas platyrhynchos]
ENSAPLG00020001906	7.79767	0.925	-3.07552	2.34e-09	4.89e-08	PKP2	XP_027311007.2 plakophilin-2, partial [Anas platyrhynchos]
ENSAPLG00020000631	17.393	66.3597	1.9318	2.44e-09	5.09e-08	Mrgprd	XP_027314839.1 proto-oncogene Mas-like [Anas platyrhynchos]
ENSAPLG00020004365	3.85967	0.251	-3.94272	2.45e-09	5.12e-08	Plekhd1	XP_038036325.1 LOW QUALITY PROTEIN: pleckstrin homology domain-containing family D member 1 [Anas platyrhynchos]
ENSAPLG00020003155	10.7187	2.22267	-2.26976	2.53e-09	5.27e-08	GPR162	XP_027305585.1 LOW QUALITY PROTEIN: probable G-protein coupled receptor 162 [Anas platyrhynchos]
ENSAPLG00020012610	14.1457	1.23367	-3.51934	2.56e-09	5.32e-08	GPR63	XP_027310628.1 probable G-protein coupled receptor 63 [Anas platyrhynchos]
ENSAPLG00020008711	24.9917	78.0787	1.64348	2.58e-09	5.35e-08	TNIK	XP_032302617.1 TRAF2 and NCK-interacting protein kinase [Coturnix japonica]
ENSAPLG00020016061	0.241333	6.34	4.71538	2.6e-09	5.4e-08	SOX13	XP_027300938.2 LOW QUALITY PROTEIN: transcription factor SOX-13 [Anas platyrhynchos]
ENSAPLG00020004067	15.2943	2.107	-2.85974	2.66e-09	5.51e-08	GUCY1B1	XP_029872977.1 guanylate cyclase soluble subunit beta-1 isoform X1 [Aquila chrysaetos chrysaetos]
ENSAPLG00020003789	52.7263	14.253	-1.88726	2.7e-09	5.58e-08	PRKAR1B	XP_009284648.1 PREDICTED: cAMP-dependent protein kinase type I-beta regulatory subunit [Aptenodytes forsteri]
ENSAPLG00020004874	0.246667	2.18467	3.14678	2.77e-09	5.73e-08	Dchs1	XP_027321702.1 protocadherin-16 isoform X1 [Anas platyrhynchos]
ENSAPLG00020002230	69.2753	171.539	1.30812	2.84e-09	5.85e-08	ODC1	XP_027311026.1 ornithine decarboxylase [Anas platyrhynchos]
ENSAPLG00020001346	34.6453	99.0653	1.51572	2.87e-09	5.92e-08	WDFY2	XP_032062490.1 WD repeat and FYVE domain-containing protein 2 [Aythya fuligula]
MSTRG.14138	72.9367	19.5237	-1.90142	2.89e-09	5.95e-08	si:dkeyp-59a8.4	XP_027309486.1 taxid=8839 protein stum homolog isoform X6 [Anas platyrhynchos]
ENSAPLG00020013341	30.881	5.30633	-2.54093	2.9e-09	5.96e-08	MSC	XP_035418971.1 musculin [Cygnus atratus]
ENSAPLG00020005184	2.65733	12.2443	2.20406	2.94e-09	6.04e-08	SLX4IP	XP_027309167.1 protein SLX4IP isoform X7 [Anas platyrhynchos]
MSTRG.1981	0.001	9.97767	13.2845	3e-09	6.15e-08	--	-
ENSAPLG00020015775	0.001	4.843	12.2417	3.01e-09	6.15e-08	CCKAR	EOB01574.1 Cholecystokinin receptor type A, partial [Anas platyrhynchos]
ENSAPLG00020016584	0.167	9.60133	5.84531	3.03e-09	6.2e-08	Pld4	XP_012959860.2 5'-3' exonuclease PLD4 isoform X1 [Anas platyrhynchos]
MSTRG.21215	15.215	3.553	-2.09838	3.05e-09	6.23e-08	--	KAK4814242.1 taxid=33587 hypothetical protein QYF61_012738 [Mycteria americana]
ENSAPLG00020006742	72.599	23.511	-1.62661	3.09e-09	6.29e-08	FASN	XP_027327035.1 fatty acid synthase isoform X1 [Anas platyrhynchos]
ENSAPLG00020016676	7.70533	36.41	2.24041	3.13e-09	6.37e-08	Bcar1	KGL73163.1 Breast cancer anti-estrogen resistance protein 1, partial [Tinamus guttatus]
MSTRG.12574	4.33233	0.538667	-3.00768	3.17e-09	6.45e-08	--	XP_047933539.1 taxid=8845 uncharacterized protein LOC125184486 [Anser cygnoides]
MSTRG.15918	0.0713333	19.2467	8.07582	3.18e-09	6.46e-08	--	-
ENSAPLG00020017245	82.7453	28.9813	-1.51355	3.21e-09	6.51e-08	Taok1	XP_015151566.1 serine/threonine-protein kinase TAO1 isoform X2 [Gallus gallus]
ENSAPLG00020011140	6.56067	1.19433	-2.45764	3.23e-09	6.54e-08	TGFBR3	XP_021132627.1 transforming growth factor beta receptor type 3 isoform X1 [Anas platyrhynchos]
ENSAPLG00020002151	19.451	57.4537	1.56255	3.32e-09	6.7e-08	Arid5a	XP_038027795.1 LOW QUALITY PROTEIN: AT-rich interactive domain-containing protein 5A [Anas platyrhynchos]
ENSAPLG00020008784	2.81	15.7367	2.48549	3.32e-09	6.71e-08	ZEB1	XP_038029704.1 zinc finger E-box-binding homeobox 1 isoform X1 [Anas platyrhynchos]
ENSAPLG00020000809	55.245	157.208	1.50876	3.4e-09	6.85e-08	CSRNP1	XP_027306175.1 cysteine/serine-rich nuclear protein 1 [Anas platyrhynchos]
ENSAPLG00020015778	10.8553	36.8697	1.76403	3.53e-09	7.11e-08	DEF6	XP_027300510.1 differentially expressed in FDCP 6 homolog [Anas platyrhynchos]
ENSAPLG00020000587	61.528	18.8163	-1.70926	3.55e-09	7.14e-08	KDSR	XP_027307482.2 3-ketodihydrosphingosine reductase [Anas platyrhynchos]
ENSAPLG00020007465	6.09733	24.1703	1.98699	3.57e-09	7.16e-08	FAM117A	XP_032058403.1 protein FAM117A [Aythya fuligula]
ENSAPLG00020014796	0.179667	6.00633	5.06309	3.57e-09	7.16e-08	NKAIN3	XP_035173830.1 sodium/potassium-transporting ATPase subunit beta-1-interacting protein 3 isoform X1 [Oxyura jamaicensis]
ENSAPLG00020000418	6.6	28.0327	2.08657	3.79e-09	7.59e-08	EFR3B	XP_027311259.1 protein EFR3 homolog B isoform X4 [Anas platyrhynchos]
ENSAPLG00020011545	101.603	16.6023	-2.61348	3.83e-09	7.66e-08	F13a1	XP_005010762.1 coagulation factor XIII A chain [Anas platyrhynchos]
MSTRG.6282	7.66267	1.46867	-2.38334	3.88e-09	7.74e-08	--	-
ENSAPLG00020016042	10.4287	60.432	2.53476	3.95e-09	7.88e-08	gfod1	XP_038030358.1 glucose-fructose oxidoreductase domain-containing protein 1 isoform X2 [Anas platyrhynchos]
ENSAPLG00020010476	0.381667	16.501	5.4341	3.98e-09	7.92e-08	--	XP_038027437.1 LOW QUALITY PROTEIN: interleukin-23 subunit alpha [Anas platyrhynchos]
ENSAPLG00020005838	0.001	8.31267	13.0211	4e-09	7.95e-08	GPR19	XP_005010098.1 probable G-protein coupled receptor 19 [Anas platyrhynchos]
ENSAPLG00020017443	10.375	38.9873	1.90989	4.07e-09	8.09e-08	SAMD4A	XP_027315081.1 protein Smaug homolog 1 isoform X2 [Anas platyrhynchos]
MSTRG.3417	250.818	47.75	-2.39307	4.14e-09	8.21e-08	STAB1	EOA97235.1 taxid=8839 Stabilin-1, partial [Anas platyrhynchos]
MSTRG.19223	0.128333	6.956	5.76029	4.15e-09	8.22e-08	--	RLW05894.1 taxid=44316 hypothetical protein DV515_00004962, partial [Chloebia gouldiae]
MSTRG.10783	0.001	4.08433	11.9959	4.17e-09	8.26e-08	--	XP_040434802.1 taxid=148594 uncharacterized protein LOC121080746 [Falco naumanni]
ENSAPLG00020002524	36.4607	11.6013	-1.65205	4.2e-09	8.3e-08	DENND1A	XP_027326693.2 DENN domain-containing protein 1A isoform X5 [Anas platyrhynchos]
MSTRG.17361	36.9013	9.26733	-1.99345	4.21e-09	8.31e-08	TYRO3	XP_038036011.1 taxid=8839 tyrosine-protein kinase receptor TYRO3 isoform X2 [Anas platyrhynchos]
ENSAPLG00020002380	0.184	6.45067	5.13167	4.21e-09	8.31e-08	wnt11b-2	XP_038040394.1 LOW QUALITY PROTEIN: protein Wnt-11b-like [Anas platyrhynchos]
ENSAPLG00020017498	3.394	15.633	2.20354	4.34e-09	8.54e-08	Cyp4b1	XP_012962218.3 cytochrome P450 4B1 [Anas platyrhynchos]
ENSAPLG00020009927	154.858	56.431	-1.45639	4.42e-09	8.69e-08	ATP11C	XP_027320663.1 phospholipid-transporting ATPase IG isoform X2 [Anas platyrhynchos]
ENSAPLG00020004539	116.458	35.8343	-1.7004	4.47e-09	8.77e-08	CCDC90B	XP_038033267.1 coiled-coil domain-containing protein 90B, mitochondrial-like isoform X1 [Anas platyrhynchos]
ENSAPLG00020000680	0.467667	7.48733	4.0009	4.63e-09	9.07e-08	CSF2RA	XP_021130912.2 interleukin-5 receptor subunit alpha [Anas platyrhynchos]
ENSAPLG00020010806	0.001	13.5133	13.7221	4.86e-09	9.51e-08	--	XP_038025341.1 histidine triad nucleotide-binding protein 1-like isoform X3 [Anas platyrhynchos]
ENSAPLG00020011561	498.466	1331.78	1.41779	4.91e-09	9.59e-08	His3.3A	QNG40051.1 histone 3 [Lymnaea stagnalis]
ENSAPLG00020013000	6.161	32.5577	2.40176	4.91e-09	9.59e-08	SLC35G1	XP_027316246.1 solute carrier family 35 member G1 [Anas platyrhynchos]
ENSAPLG00020008049	76.9837	26.6343	-1.53127	4.98e-09	9.72e-08	RAB29	XP_042689713.1 ras-related protein Rab-7L1 [Centrocercus urophasianus]
ENSAPLG00020000429	0.001	3.52733	11.7844	5.18e-09	1.01e-07	Dll4	XP_027315365.1 delta-like protein 4 [Anas platyrhynchos]
ENSAPLG00020013302	407.373	145.808	-1.48228	5.2e-09	1.01e-07	SMPDL3A	XP_038032878.1 acid sphingomyelinase-like phosphodiesterase 3a [Anas platyrhynchos]
ENSAPLG00020017457	9.85467	2.05633	-2.26073	5.5e-09	1.07e-07	CACHD1	XP_035420309.1 VWFA and cache domain-containing protein 1 [Cygnus atratus]
ENSAPLG00020010836	459.791	2146.23	2.22276	5.52e-09	1.07e-07	CD69	AAT73605.1 AICL-like 2 [Anas platyrhynchos]
ENSAPLG00020017599	63.526	18.605	-1.77166	5.54e-09	1.07e-07	KLHL13	XP_005031236.1 kelch-like protein 13 isoform X2 [Anas platyrhynchos]
ENSAPLG00020002388	283.734	112.038	-1.34056	5.63e-09	1.09e-07	SMAP2	XP_038023367.1 LOW QUALITY PROTEIN: stromal membrane-associated protein 2 [Anas platyrhynchos]
ENSAPLG00020013467	118.109	34.609	-1.7709	5.68e-09	1.1e-07	WDFY4	XP_021129955.1 WD repeat- and FYVE domain-containing protein 4 isoform X1 [Anas platyrhynchos]
ENSAPLG00020004381	10.7843	1.81033	-2.57461	5.7e-09	1.1e-07	C8orf37	XP_027308290.1 protein C8orf37 homolog [Anas platyrhynchos]
ENSAPLG00020011062	2.692	10.729	1.99477	5.72e-09	1.1e-07	TNK2	XP_032049310.1 activated CDC42 kinase 1 isoform X4 [Aythya fuligula]
ENSAPLG00020013833	62.385	172.823	1.47002	5.75e-09	1.11e-07	PTPN2	XP_027307887.2 tyrosine-protein phosphatase non-receptor type 2 isoform X3 [Anas platyrhynchos]
ENSAPLG00020008527	0.069	5.18933	6.23281	5.85e-09	1.13e-07	F2RL1	XP_027302957.1 proteinase-activated receptor 2 isoform X2 [Anas platyrhynchos]
ENSAPLG00020016138	112.081	293.248	1.38758	5.89e-09	1.13e-07	tor4a-a	XP_038020919.1 torsin-4A isoform X2 [Anas platyrhynchos]
ENSAPLG00020011470	591.515	173.942	-1.76581	5.92e-09	1.13e-07	AP3M2	XP_027299381.1 AP-3 complex subunit mu-2 [Anas platyrhynchos]
ENSAPLG00020009450	3.767	24.611	2.70782	6.01e-09	1.15e-07	Cd274	XP_027302587.1 programmed cell death 1 ligand 2 isoform X1 [Anas platyrhynchos]
ENSAPLG00020002187	0.378	6.06967	4.00516	6.1e-09	1.17e-07	CRTAM	EOA96326.1 Cytotoxic and regulatory T-cell molecule, partial [Anas platyrhynchos]
ENSAPLG00020017225	316.025	123.12	-1.35998	6.14e-09	1.17e-07	BLMH	EOA98675.1 Bleomycin hydrolase, partial [Anas platyrhynchos]
ENSAPLG00020001388	20.7697	3.11033	-2.73934	6.17e-09	1.18e-07	KIAA1324L	XP_027315998.2 endosome/lysosome-associated apoptosis and autophagy regulator family member 2 isoform X1 [Anas platyrhynchos]
ENSAPLG00020008410	0.325667	3.723	3.515	6.18e-09	1.18e-07	JCAD	XP_027306360.2 LOW QUALITY PROTEIN: junctional protein associated with coronary artery disease [Anas platyrhynchos]
ENSAPLG00020007992	31.4163	88.587	1.49558	6.37e-09	1.21e-07	IRF2	XP_027312091.1 interferon regulatory factor 2 [Anas platyrhynchos]
ENSAPLG00020016240	113.154	331.442	1.55047	6.44e-09	1.22e-07	NUGGC	XP_027311284.2 nuclear GTPase SLIP-GC-like isoform X1 [Anas platyrhynchos]
ENSAPLG00020014157	9.719	36.723	1.9178	6.5e-09	1.23e-07	CYP27B1	XP_040399726.1 25-hydroxyvitamin D-1 alpha hydroxylase, mitochondrial [Cygnus olor]
MSTRG.5615	1.72433	8.45867	2.29439	6.77e-09	1.28e-07	--	KAK4827789.1 taxid=33587 hypothetical protein QYF61_021742 [Mycteria americana]
ENSAPLG00020012775	0.274667	3.824	3.79933	6.88e-09	1.3e-07	zfpm1	XP_038041290.1 LOW QUALITY PROTEIN: zinc finger protein ZFPM1 [Anas platyrhynchos]
ENSAPLG00020006607	5.60567	31.32	2.48213	6.99e-09	1.32e-07	P2rx1	XP_038021872.1 P2X purinoceptor 1 isoform X1 [Anas platyrhynchos]
ENSAPLG00020013736	32.757	9.08	-1.85104	7e-09	1.32e-07	BDH1	XP_038039505.1 D-beta-hydroxybutyrate dehydrogenase, mitochondrial [Anas platyrhynchos]
ENSAPLG00020000839	698.857	1847.4	1.40243	7.04e-09	1.33e-07	LCP1	XP_032045933.1 plastin-2 isoform X1 [Aythya fuligula]
MSTRG.10859	0.001	3.34367	11.7072	7.07e-09	1.33e-07	Dcaf12	XP_038025564.1 taxid=8839 DDB1- and CUL4-associated factor 12-like isoform X2 [Anas platyrhynchos]
ENSAPLG00020017034	340.705	103.287	-1.72187	7.08e-09	1.33e-07	ALDH3A2	XP_005023140.3 aldehyde dehydrogenase family 3 member A2-like [Anas platyrhynchos]
ENSAPLG00020010052	85.686	29.0383	-1.5611	7.1e-09	1.33e-07	POMT1	XP_005013301.3 protein O-mannosyl-transferase 1 [Anas platyrhynchos]
MSTRG.7954	1.74933	9.32667	2.41456	7.23e-09	1.36e-07	--	-
ENSAPLG00020013943	231.561	87.3413	-1.40665	7.24e-09	1.36e-07	Ralbp1	XP_027307855.1 LOW QUALITY PROTEIN: ralA-binding protein 1 [Anas platyrhynchos]
ENSAPLG00020004991	4.628	30.2743	2.70963	7.27e-09	1.36e-07	CNST	XP_027309661.1 consortin isoform X2 [Anas platyrhynchos]
ENSAPLG00020004346	47.9773	14.4497	-1.73132	7.49e-09	1.4e-07	SEC24D	XP_038034913.1 protein transport protein Sec24D-like isoform X2 [Anas platyrhynchos]
ENSAPLG00020012331	68.2523	20.3293	-1.74732	7.6e-09	1.42e-07	Kctd12	XP_032062797.1 BTB/POZ domain-containing protein KCTD12 [Aythya fuligula]
ENSAPLG00020013361	2.48233	20.0113	3.01105	7.63e-09	1.42e-07	PPP1R3C	XP_027316129.1 protein phosphatase 1 regulatory subunit 3C [Anas platyrhynchos]
ENSAPLG00020000892	3.57667	20.4217	2.51341	7.68e-09	1.43e-07	GATA3	XP_027316594.1 trans-acting T-cell-specific transcription factor GATA-3 isoform X2 [Anas platyrhynchos]
00617//positive regulation of histone H3-K9 acetylation;GO:2000677//regulation of transcription regulatory region DNA binding;GO:2000679//positive regulation of transcription regulatory region DNA binding;GO:2000683//regulation of cellular response to X-ray;GO:2000696//regulation of epithelial cell differentiation involved in kidney development;GO:2000702//regulation of fibroblast growth factor r…
ENSAPLG00020015912	597.819	8.18667	-6.19029	7.72e-09	1.44e-07	CHIA	XP_038024146.1 acidic mammalian chitinase isoform X3 [Anas platyrhynchos]
ENSAPLG00020008788	2.15467	15.3783	2.83536	7.83e-09	1.46e-07	KAZN	XP_032057338.1 kazrin isoform X1 [Aythya fuligula]
ENSAPLG00020000550	8.979	28.6287	1.67283	7.86e-09	1.46e-07	DAPP1	XP_027311734.2 dual adapter for phosphotyrosine and 3-phosphotyrosine and 3-phosphoinositide isoform X1 [Anas platyrhynchos]
ENSAPLG00020001913	6.39033	0.0656667	-6.60459	7.88e-09	1.46e-07	NPAS2	XP_027301840.2 neuronal PAS domain-containing protein 2 isoform X1 [Anas platyrhynchos]
ENSAPLG00020009481	0.244	9.56633	5.29301	7.89e-09	1.46e-07	SLC16A13	EOB06087.1 Monocarboxylate transporter 2, partial [Anas platyrhynchos]
ENSAPLG00020000086	0.225	2.62333	3.5434	7.98e-09	1.48e-07	Gvin1	XP_032039457.1 interferon-induced very large GTPase 1-like [Aythya fuligula]
ENSAPLG00020000079	354.629	138.401	-1.35746	8.01e-09	1.48e-07	SCIN	XP_027306671.1 adseverin isoform X1 [Anas platyrhynchos]
ENSAPLG00020013848	47.6123	148.046	1.63664	8.13e-09	1.5e-07	BID	XP_032051014.1 BH3-interacting domain death agonist [Aythya fuligula]
MSTRG.4795	0.0633333	13.207	7.70412	8.24e-09	1.52e-07	--	EOB00808.1 taxid=8839 hypothetical protein Anapl_09822 [Anas platyrhynchos]
ENSAPLG00020006084	4.88633	24.8833	2.34836	8.28e-09	1.52e-07	GSTT1	XP_005023587.1 glutathione S-transferase theta-2B [Anas platyrhynchos]
MSTRG.11799	2.53367	13.1977	2.38098	8.43e-09	1.55e-07	--	XP_017676860.1 taxid=321398 PREDICTED: complement component receptor 1-like protein isoform X2 [Lepidothrix coronata]
MSTRG.12992	0.001	7.128	12.7993	8.45e-09	1.55e-07	--	-
ENSAPLG00020008849	33.1703	94.8887	1.51634	9.01e-09	1.65e-07	LRP3	XP_027322767.1 low-density lipoprotein receptor-related protein 3 isoform X4 [Anas platyrhynchos]
MSTRG.15267	0.001	14.838	13.857	9.21e-09	1.69e-07	CD163	XP_038028119.1 taxid=8839 scavenger receptor cysteine-rich type 1 protein M130-like [Anas platyrhynchos]
ENSAPLG00020016216	23.2593	69.3807	1.57672	9.65e-09	1.77e-07	Clk3	XP_038041049.1 dual specificity protein kinase CLK3 isoform X2 [Anas platyrhynchos]
ENSAPLG00020002574	0.306333	5.50633	4.16792	9.67e-09	1.77e-07	mgat4b	XP_027312524.2 alpha-1,3-mannosyl-glycoprotein 4-beta-N-acetylglucosaminyltransferase-like protein MGAT4D isoform X2 [Anas platyrhynchos]
ENSAPLG00020017622	2.11733	11.7217	2.46886	9.79e-09	1.79e-07	PRKD1	XP_027313605.1 serine/threonine-protein kinase D1 isoform X1 [Anas platyrhynchos]
ENSAPLG00020002848	129.905	402.808	1.63263	9.82e-09	1.79e-07	Clec2e	XP_032061103.1 C-type lectin domain family 2 member B-like [Aythya fuligula]
ENSAPLG00020011065	157.018	4861.31	4.95234	9.92e-09	1.81e-07	CXCL8	NP_001297349.1 interleukin-8 precursor [Anas platyrhynchos]
ENSAPLG00020000615	220.307	70.666	-1.64043	1.04e-08	1.89e-07	GSTK1	XP_021125849.2 glutathione S-transferase kappa 1 [Anas platyrhynchos]
ENSAPLG00020011009	0.516667	7.57367	3.87369	1.13e-08	2.05e-07	Prdm8	XP_027312788.1 PR domain zinc finger protein 8 [Anas platyrhynchos]
ENSAPLG00020015304	2.084	12.607	2.5968	1.16e-08	2.1e-07	CD3D	XP_027299978.1 T-cell surface glycoprotein CD3 delta chain [Anas platyrhynchos]
ENSAPLG00020012927	613.375	201.147	-1.60852	1.21e-08	2.19e-07	GPRC5B	XP_027324615.2 G-protein coupled receptor family C group 5 member B [Anas platyrhynchos]
ENSAPLG00020015090	15.179	47.4117	1.64317	1.21e-08	2.19e-07	SKI	XP_005011105.1 ski oncogene [Anas platyrhynchos]
ENSAPLG00020008894	9.094	1.63233	-2.47798	1.22e-08	2.21e-07	Crym	XP_027325365.1 ketimine reductase mu-crystallin isoform X2 [Anas platyrhynchos]
ENSAPLG00020015127	0.119	6.966	5.8713	1.26e-08	2.27e-07	NUAK2	XP_027300601.2 NUAK family SNF1-like kinase 2 isoform X1 [Anas platyrhynchos]
ENSAPLG00020002174	0.001	2.369	11.2101	1.26e-08	2.28e-07	ZNF131	XP_038025404.1 zinc finger protein 131 isoform X1 [Anas platyrhynchos]
ENSAPLG00020005246	4.51933	17.3267	1.93881	1.27e-08	2.28e-07	JAG1	XP_027309157.1 protein jagged-1 isoform X2 [Anas platyrhynchos]
ENSAPLG00020000265	1.457	78.0137	5.74265	1.27e-08	2.28e-07	SERPINB10	XP_038030020.1 LOW QUALITY PROTEIN: serpin B10-like [Anas platyrhynchos]
ENSAPLG00020007300	406.519	121.196	-1.74598	1.38e-08	2.48e-07	Bhlhe41	XP_027305817.1 class E basic helix-loop-helix protein 41 [Anas platyrhynchos]
ENSAPLG00020012513	6.607	1.92133	-1.78189	1.39e-08	2.49e-07	PLXNB1	XP_027323144.2 plexin-B1 isoform X2 [Anas platyrhynchos]
MSTRG.8242	19.3977	62.2153	1.68139	1.4e-08	2.5e-07	--	XP_040403702.1 taxid=8869 pH-response regulator protein palI/prr-5-like [Cygnus olor]
ENSAPLG00020006927	370.316	138.246	-1.42152	1.41e-08	2.52e-07	HSD17B12	O57314.1 RecName: Full=Very-long-chain 3-oxoacyl-CoA reductase; AltName: Full=17-beta-hydroxysteroid dehydrogenase 12; Short=17-beta-HSD 12; AltName: Full=3-ketoacyl-CoA reductase; Short=KAR; AltName: Full=Estradiol 17-beta-dehydrogenase 12 [Anas platyrhynchos]
ENSAPLG00020002595	36.8653	11.7413	-1.65067	1.42e-08	2.54e-07	NEDD4L	XP_005023429.4 E3 ubiquitin-protein ligase NEDD4-like isoform X1 [Anas platyrhynchos]
ENSAPLG00020014670	64.8927	21.0113	-1.62689	1.44e-08	2.57e-07	ANO10	XP_038029893.1 anoctamin-10 isoform X2 [Anas platyrhynchos]
ENSAPLG00020005628	0.375	5.45067	3.86147	1.5e-08	2.68e-07	ERG	XP_032063909.1 transcriptional regulator ERG isoform X1 [Aythya fuligula]
ENSAPLG00020014632	1.292	13.3497	3.36913	1.51e-08	2.7e-07	SERPING1	XP_038036331.1 LOW QUALITY PROTEIN: plasma protease C1 inhibitor [Anas platyrhynchos]
ENSAPLG00020018214	1.39467	19.9323	3.83712	1.57e-08	2.8e-07	hsp30c	XP_032058851.1 heat shock protein 30C-like [Aythya fuligula]
ENSAPLG00020018253	53.403	151.758	1.50678	1.63e-08	2.9e-07	SUSD3	XP_038042044.1 sushi domain-containing protein 3 [Anas platyrhynchos]
MSTRG.145	0.180333	3.15133	4.12722	1.64e-08	2.91e-07	--	-
ENSAPLG00020016958	0.001	3.33967	11.7055	1.65e-08	2.92e-07	Inava	XP_035170464.1 innate immunity activator protein isoform X2 [Oxyura jamaicensis]
ENSAPLG00020017459	0.699333	6.94033	3.31095	1.65e-08	2.92e-07	RAVER2	XP_027319596.1 ribonucleoprotein PTB-binding 2 isoform X7 [Anas platyrhynchos]
MSTRG.2134	0.001	4.15467	12.0205	1.67e-08	2.95e-07	--	EOB06512.1 taxid=8839 hypothetical protein Anapl_03670 [Anas platyrhynchos]
ENSAPLG00020018158	5.66867	24.1233	2.08935	1.71e-08	3.03e-07	SMAD7	XP_038025852.1 mothers against decapentaplegic homolog 7 isoform X1 [Anas platyrhynchos]
ENSAPLG00020011899	49.524	166.72	1.75123	1.76e-08	3.11e-07	MAPRE2	XP_027307917.2 microtubule-associated protein RP/EB family member 2 isoform X2 [Anas platyrhynchos]
MSTRG.22018	0.136667	5.173	5.24227	1.81e-08	3.19e-07	--	-
ENSAPLG00020009206	0.101333	1.60867	3.98868	1.91e-08	3.36e-07	MAP1B	XP_038025844.1 microtubule-associated protein 1B [Anas platyrhynchos]
ENSAPLG00020015757	11.212	36.697	1.71062	1.93e-08	3.39e-07	SCAPER	XP_027321393.2 S phase cyclin A-associated protein in the endoplasmic reticulum isoform X2 [Anas platyrhynchos]
MSTRG.5640	0.211	3.27967	3.95823	1.97e-08	3.45e-07	--	-
ENSAPLG00020016294	35.2523	95.8243	1.44267	1.97e-08	3.45e-07	TMCC3	XP_027307927.1 transmembrane and coiled-coil domain protein 3 isoform X1 [Anas platyrhynchos]
ENSAPLG00020001934	10.4163	2.12467	-2.29354	1.97e-08	3.45e-07	TBC1D8	XP_038029159.1 LOW QUALITY PROTEIN: TBC1 domain family member 8 [Anas platyrhynchos]
ENSAPLG00020004050	8.28867	0.305667	-4.76111	2.02e-08	3.54e-07	QRFPR	XP_027312681.2 pyroglutamylated RF-amide peptide receptor isoform X1 [Anas platyrhynchos]
ENSAPLG00020010940	907.689	2543.52	1.48655	2.13e-08	3.72e-07	SAT1	XP_032063414.1 diamine acetyltransferase 1 [Aythya fuligula]
ENSAPLG00020007048	0.001	11.087	13.4366	2.14e-08	3.74e-07	TFPI2	XP_027306594.1 tissue factor pathway inhibitor 2 isoform X2 [Anas platyrhynchos]
ENSAPLG00020001381	6.978	1.20833	-2.5298	2.16e-08	3.77e-07	E2F7	XP_027310427.1 transcription factor E2F7 isoform X1 [Anas platyrhynchos]
ENSAPLG00020015995	1.19433	9.408	2.97768	2.22e-08	3.87e-07	S1PR1	XP_032856276.1 sphingosine 1-phosphate receptor 1 isoform X1 [Tyto alba alba]
MSTRG.5521	11.2853	1.26567	-3.15648	2.24e-08	3.89e-07	C5orf47	XP_040429477.1 taxid=8869 uncharacterized protein C5orf47 homolog isoform X2 [Cygnus olor]
ENSAPLG00020006957	469.341	177.444	-1.40327	2.24e-08	3.89e-07	Tpd52	XP_038029851.1 tumor protein D52 isoform X4 [Anas platyrhynchos]
ENSAPLG00020018246	15.5883	4.785	-1.70388	2.33e-08	4.05e-07	SNX29	XP_005018502.1 sorting nexin-29 isoform X1 [Anas platyrhynchos]
ENSAPLG00020018211	0.341333	2.389	2.80715	2.33e-08	4.05e-07	KIAA1549	XP_027304869.2 LOW QUALITY PROTEIN: UPF0606 protein KIAA1549 homolog [Anas platyrhynchos]
ENSAPLG00020003552	77.0167	25.3037	-1.60582	2.43e-08	4.21e-07	WDFY3	XP_038034616.1 WD repeat and FYVE domain-containing protein 3 isoform X2 [Anas platyrhynchos]
MSTRG.5895	0.0703333	6.24	6.47119	2.46e-08	4.26e-07	--	KQL61521.1 taxid=12930 hypothetical protein AAES_13765 [Amazona aestiva]
ENSAPLG00020014702	0.001	2.071	11.0161	2.48e-08	4.28e-07	PEAR1	XP_032060189.1 LOW QUALITY PROTEIN: platelet endothelial aggregation receptor 1 [Aythya fuligula]
ENSAPLG00020014978	0.746333	8.49733	3.50912	2.5e-08	4.32e-07	ENC1	XP_005029143.1 ectoderm-neural cortex protein 1-like [Anas platyrhynchos]
ENSAPLG00020004244	12.306	3.91267	-1.65314	2.58e-08	4.44e-07	FBN1	XP_027322591.1 fibrillin-1 isoform X1 [Anas platyrhynchos]
ENSAPLG00020004900	13046.2	4631.07	-1.49421	2.59e-08	4.46e-07	PSAP	XP_027316348.1 prosaposin isoform X3 [Anas platyrhynchos]
ENSAPLG00020001085	81.0623	221.419	1.44967	2.67e-08	4.59e-07	DTX3L	XP_027318027.2 E3 ubiquitin-protein ligase DTX3L [Anas platyrhynchos]
ENSAPLG00020010852	0.001	2.33867	11.1915	2.67e-08	4.59e-07	Gnaq	XP_032062804.1 guanine nucleotide-binding protein G(q) subunit alpha-like [Aythya fuligula]
ENSAPLG00020011247	52.9483	17.538	-1.5941	2.69e-08	4.62e-07	FDX1	XP_027324427.2 adrenodoxin, mitochondrial [Anas platyrhynchos]
ENSAPLG00020008395	43.591	108.211	1.31174	2.72e-08	4.67e-07	MAP3K8	XP_027306363.1 mitogen-activated protein kinase kinase kinase 8 [Anas platyrhynchos]
ENSAPLG00020001306	70.9863	168.306	1.24547	2.74e-08	4.69e-07	CD81	XP_027314310.1 CD81 antigen [Anas platyrhynchos]
ENSAPLG00020004743	136.743	45.452	-1.58905	2.75e-08	4.71e-07	Atp11a	XP_005021886.1 probable phospholipid-transporting ATPase IH isoform X1 [Anas platyrhynchos]
ENSAPLG00020011445	3.29	19.415	2.56101	2.93e-08	5.01e-07	--	PKU36053.1 rna-directed dna polymerase from mobile element jockey-like [Limosa lapponica baueri]
ENSAPLG00020017069	6.50567	25.1623	1.9515	2.95e-08	5.04e-07	ASPA	XP_005023153.1 aspartoacylase [Anas platyrhynchos]
ENSAPLG00020013126	107.451	31.4447	-1.77279	2.96e-08	5.05e-07	Slc49a4	XP_005017587.3 solute carrier family 49 member 4 isoform X1 [Anas platyrhynchos]
ENSAPLG00020008973	9.03433	1.31733	-2.7778	2.99e-08	5.09e-07	ARHGEF28	XP_038026755.1 rho guanine nucleotide exchange factor 28 isoform X3 [Anas platyrhynchos]
ENSAPLG00020016189	17.5857	51.4493	1.54875	3.07e-08	5.21e-07	IRAK2	XP_027323210.1 interleukin-1 receptor-associated kinase-like 2 [Anas platyrhynchos]
ENSAPLG00020006621	10.1673	35.8933	1.81977	3.08e-08	5.24e-07	PRKCH	XP_027313812.1 protein kinase C eta type isoform X1 [Anas platyrhynchos]
ENSAPLG00020000803	117.36	44.3743	-1.40314	3.15e-08	5.34e-07	Gorasp1	XP_027306179.1 Golgi reassembly-stacking protein 1 [Anas platyrhynchos]
ENSAPLG00020017082	68.5063	24.191	-1.50177	3.25e-08	5.51e-07	Stk25	XP_009282504.1 PREDICTED: serine/threonine-protein kinase 25 [Aptenodytes forsteri]
MSTRG.11824	5.419	0.0903333	-5.90662	3.28e-08	5.56e-07	--	EOB05638.1 taxid=8839 hypothetical protein Anapl_02052 [Anas platyrhynchos]
ENSAPLG00020015663	95.6803	34.7537	-1.46106	3.34e-08	5.64e-07	CD300E	XP_038024272.1 LOW QUALITY PROTEIN: polymeric immunoglobulin receptor-like [Anas platyrhynchos]
MSTRG.2267	0.001	2.04533	10.9981	3.34e-08	5.64e-07	--	-
MSTRG.9836	5.34667	18.1867	1.76617	3.38e-08	5.7e-07	--	CAK6566308.1 taxid=9079 unnamed protein product [Alectoris rufa]
MSTRG.15351	0.001	7.53933	12.8802	3.42e-08	5.77e-07	--	XP_040398540.1 taxid=8869 uncharacterized protein LOC121062564 [Cygnus olor]
ENSAPLG00020018264	14.7703	48.3313	1.71026	3.46e-08	5.82e-07	Trim24	XP_038021920.1 transcription intermediary factor 1-alpha isoform X1 [Anas platyrhynchos]
ENSAPLG00020006992	2.02	13.239	2.71237	3.46e-08	5.82e-07	TSPAN18	XP_032043915.1 tetraspanin-18 [Aythya fuligula]
ENSAPLG00020001845	0.141667	3.953	4.80238	3.61e-08	6.06e-07	DGKB	XP_032038568.1 diacylglycerol kinase beta isoform X1 [Aythya fuligula]
ENSAPLG00020010888	121.38	268.603	1.14595	3.62e-08	6.07e-07	Zc3h12a	XP_027299850.1 LOW QUALITY PROTEIN: endoribonuclease ZC3H12A [Anas platyrhynchos]
ENSAPLG00020005780	26.4993	64.2197	1.27706	3.74e-08	6.27e-07	PRDM1	XP_038033042.1 PR domain zinc finger protein 1 isoform X1 [Anas platyrhynchos]
MSTRG.8382	187.891	66.7553	-1.49294	3.78e-08	6.32e-07	RAB10	XP_038029931.1 taxid=8839 ras-related protein Rab-10 isoform X3 [Anas platyrhynchos]
ENSAPLG00020003917	104.942	33.0333	-1.6676	3.9e-08	6.53e-07	RIDA	XP_027308306.2 2-iminobutanoate/2-iminopropanoate deaminase [Anas platyrhynchos]
ENSAPLG00020017559	27.5767	8.44633	-1.70705	3.93e-08	6.56e-07	LD	XP_035395442.1 formin-1 isoform X2 [Cygnus atratus]
ENSAPLG00020009534	104.156	28.6507	-1.86211	3.94e-08	6.57e-07	Ak6	EOB07780.1 Adenylate kinase isoenzyme 6, partial [Anas platyrhynchos]
ENSAPLG00020006174	12.4963	37.405	1.58173	3.97e-08	6.61e-07	RAD50	XP_038042461.1 LOW QUALITY PROTEIN: DNA repair protein RAD50 [Anas platyrhynchos]
MSTRG.8589	0.103667	5.3	5.67597	3.98e-08	6.63e-07	--	-
ENSAPLG00020004690	0.0636667	4.44667	6.12604	3.98e-08	6.63e-07	CD163L1	XP_038028667.1 scavenger receptor cysteine-rich type 1 protein M130-like [Anas platyrhynchos]
MSTRG.20645	15.339	45.165	1.558	4.05e-08	6.73e-07	--	XP_038040067.1 taxid=8839 uncharacterized protein LOC113841911 [Anas platyrhynchos]
MSTRG.14636	2.68867	16.189	2.59005	4.11e-08	6.82e-07	--	KAI6060477.1 taxid=8832 Zinc finger protein RFP [Aix galericulata]
ENSAPLG00020000904	125.638	297.826	1.2452	4.14e-08	6.87e-07	TAX1BP1	XP_027306779.1 tax1-binding protein 1 isoform X1 [Anas platyrhynchos]
ENSAPLG00020013709	6.584	21.943	1.73672	4.19e-08	6.93e-07	INPP1	XP_038027608.1 LOW QUALITY PROTEIN: inositol polyphosphate 1-phosphatase [Anas platyrhynchos]
ENSAPLG00020000336	0.0513333	7.92533	7.27043	4.21e-08	6.97e-07	CHST1	XP_005014027.1 carbohydrate sulfotransferase 1 [Anas platyrhynchos]
ENSAPLG00020007023	35.468	9.232	-1.9418	4.22e-08	6.97e-07	CLYBL	XP_038029370.1 citramalyl-CoA lyase, mitochondrial isoform X3 [Anas platyrhynchos]
ENSAPLG00020003730	80.9223	26.6147	-1.60432	4.23e-08	6.98e-07	PSD3	XP_038025797.1 PH and SEC7 domain-containing protein 3 isoform X3 [Anas platyrhynchos]
ENSAPLG00020004538	40.087	11.013	-1.86393	4.24e-08	6.98e-07	GATB	XP_027312462.1 glutamyl-tRNA(Gln) amidotransferase subunit B, mitochondrial [Anas platyrhynchos]
ENSAPLG00020011868	7707.34	1900.56	-2.01981	4.34e-08	7.14e-07	TFRC	EOA96246.1 Transferrin receptor protein 1, partial [Anas platyrhynchos]
ENSAPLG00020015959	12.3667	2.61233	-2.24305	4.4e-08	7.23e-07	DBT	XP_009883214.1 PREDICTED: lipoamide acyltransferase component of branched-chain alpha-keto acid dehydrogenase complex, mitochondrial [Charadrius vociferus]
MSTRG.3421	185.037	44.6433	-2.0513	4.4e-08	7.23e-07	Stab1	XP_027323086.1 taxid=8839 stabilin-1 isoform X1 [Anas platyrhynchos]
MSTRG.19665	0.638667	9.38033	3.8765	4.42e-08	7.25e-07	--	-
MSTRG.12588	1.54433	6.85567	2.15031	4.43e-08	7.25e-07	--	-
ENSAPLG00020003196	1.59767	21.3007	3.73686	4.47e-08	7.31e-07	Rnf39	XP_038043925.1 RING finger protein 39-like isoform X2 [Anas platyrhynchos]
ENSAPLG00020001616	0.001	65.6763	16.0031	4.56e-08	7.46e-07	Il17f	NP_001297279.1 interleukin-17A precursor [Anas platyrhynchos]
MSTRG.21055	0.001	2.603	11.346	4.59e-08	7.51e-07	--	KAI6058077.1 taxid=8832 Complement C1q tumor necrosis factor-related protein 3 isoform X1 [Aix galericulata]
ENSAPLG00020016637	0.266	8.21967	4.94958	4.62e-08	7.54e-07	PRPS2	XP_038028933.1 ribose-phosphate pyrophosphokinase 2 isoform X1 [Anas platyrhynchos]
ENSAPLG00020016684	599.997	1373.22	1.19454	4.63e-08	7.54e-07	BTG1	XP_005155221.3 protein BTG1 [Melopsittacus undulatus]
ENSAPLG00020008947	175.28	65.0483	-1.43007	4.72e-08	7.69e-07	Tmem159	XP_027324717.2 lipid droplet assembly factor 1 [Anas platyrhynchos]
ENSAPLG00020000287	0.0303333	4.37967	7.17377	4.74e-08	7.72e-07	HAS2	XP_005019097.1 hyaluronan synthase 2 [Anas platyrhynchos]
ENSAPLG00020013412	0.0896667	4.62033	5.68728	4.82e-08	7.83e-07	Esam	XP_027300095.2 LOW QUALITY PROTEIN: endothelial cell-selective adhesion molecule [Anas platyrhynchos]
ENSAPLG00020001118	11.6797	42.763	1.87236	4.85e-08	7.87e-07	LPAR6	XP_032055368.1 lysophosphatidic acid receptor 6 [Aythya fuligula]
ENSAPLG00020016423	0.022	1.98867	6.49815	4.95e-08	8.03e-07	TNC	XP_040387719.1 tenascin isoform X1 [Cygnus olor]
ENSAPLG00020014024	1045.56	372.667	-1.48832	4.97e-08	8.05e-07	M6PR	XP_027305683.1 cation-dependent mannose-6-phosphate receptor [Anas platyrhynchos]
ENSAPLG00020014042	9.73467	1.72	-2.50072	5.14e-08	8.32e-07	RIMKLB	XP_024998537.1 beta-citrylglutamate synthase B isoform X2 [Gallus gallus]
ENSAPLG00020010713	76.0423	29.4897	-1.36659	5.29e-08	8.55e-07	NELFA	XP_035180941.1 negative elongation factor A isoform X1 [Oxyura jamaicensis]
ENSAPLG00020002632	71.523	27.0583	-1.40233	5.49e-08	8.85e-07	Pus1	XP_027326000.1 tRNA pseudouridine synthase A [Anas platyrhynchos]
ENSAPLG00020015897	20.3667	6.49	-1.64992	5.56e-08	8.97e-07	ADGRA3	EOB02559.1 Putative G-protein coupled receptor 125, partial [Anas platyrhynchos]
ENSAPLG00020005428	230.792	84.195	-1.45479	5.72e-08	9.22e-07	GNPDA1	XP_021130132.2 LOW QUALITY PROTEIN: glucosamine-6-phosphate isomerase 1 [Anas platyrhynchos]
MSTRG.3556	0.0463333	7.42167	7.32355	5.83e-08	9.38e-07	--	-
ENSAPLG00020015794	31.7357	88.2063	1.47478	5.99e-08	9.61e-07	HYAL3	XP_038041888.1 hyaluronidase-3-like [Anas platyrhynchos]
MSTRG.486	989.148	373.779	-1.404	5.99e-08	9.61e-07	--	-
ENSAPLG00020000403	13.5127	47.6603	1.81848	6.21e-08	9.95e-07	PRKAG2	XP_032036845.1 5'-AMP-activated protein kinase subunit gamma-2 isoform X1 [Aythya fuligula]
ENSAPLG00020012908	0.342333	6.375	4.21895	6.26e-08	1e-06	BMP5	XP_038033318.1 bone morphogenetic protein 5 isoform X1 [Anas platyrhynchos]
MSTRG.20534	30.7067	91.627	1.57722	6.28e-08	1.01e-06	GBP1	XP_038041848.1 taxid=8839 guanylate-binding protein 1-like [Anas platyrhynchos]
ENSAPLG00020015109	3.046	22.2407	2.86821	6.31e-08	1.01e-06	GPR171	XP_032048906.1 probable G-protein coupled receptor 171 [Aythya fuligula]
ENSAPLG00020014326	1.035	113.444	6.7762	6.39e-08	1.02e-06	Jchain	XP_005031370.1 immunoglobulin J chain [Anas platyrhynchos]
ENSAPLG00020010596	161.528	421.894	1.38509	6.42e-08	1.02e-06	CD47	XP_027305272.2 leukocyte surface antigen CD47 isoform X2 [Anas platyrhynchos]
ENSAPLG00020015576	26.6237	97.3883	1.87104	6.55e-08	1.04e-06	--	XP_005017687.1 T-cell surface antigen CD2 isoform X1 [Anas platyrhynchos]
ENSAPLG00020015213	0.315	3.71967	3.56175	6.58e-08	1.05e-06	LEKR1	XP_038039643.1 leucine-, glutamate- and lysine-rich protein 1 isoform X3 [Anas platyrhynchos]
MSTRG.18412	38.162	14.629	-1.38331	6.64e-08	1.06e-06	smarcal1	XP_027317207.2 taxid=8839 LOW QUALITY PROTEIN: SWI/SNF-related matrix-associated actin-dependent regulator of chromatin subfamily A-like protein 1 [Anas platyrhynchos]
MSTRG.14156	0.124333	2.967	4.57672	7.15e-08	1.14e-06	--	-
ENSAPLG00020006476	10.883	55.3777	2.34723	7.21e-08	1.14e-06	Rpain	XP_027301682.1 RPA-interacting protein [Anas platyrhynchos]
ENSAPLG00020003385	7.44233	1.748	-2.09005	7.21e-08	1.14e-06	PAPLN	XP_032045276.1 papilin [Aythya fuligula]
ENSAPLG00020015875	0.001	1.916	10.9039	7.24e-08	1.15e-06	MOV10L1	XP_005020914.1 RNA helicase Mov10l1 isoform X1 [Anas platyrhynchos]
ENSAPLG00020004374	277.794	887.746	1.67613	7.36e-08	1.16e-06	CNOT9	CAG31883.1 hypothetical protein RCJMB04_13a11 [Gallus gallus]
ENSAPLG00020008086	52.0223	15.2833	-1.76717	7.41e-08	1.17e-06	Spata13	XP_005022631.1 spermatogenesis-associated protein 13 isoform X5 [Anas platyrhynchos]
ENSAPLG00020002640	2.68933	12.2777	2.19072	7.45e-08	1.18e-06	Cd5	XP_027314800.2 T-cell surface glycoprotein CD5 isoform X3 [Anas platyrhynchos]
ENSAPLG00020012126	5.20467	28.2263	2.43916	7.84e-08	1.24e-06	Plek	XP_005025221.1 pleckstrin [Anas platyrhynchos]
ENSAPLG00020009908	1.68467	11.6617	2.79124	7.9e-08	1.24e-06	VEGFC	XP_032042682.1 LOW QUALITY PROTEIN: vascular endothelial growth factor C, partial [Aythya fuligula]
ENSAPLG00020008424	16.1167	57.1407	1.82596	8.04e-08	1.27e-06	HACD4	XP_027301932.1 very-long-chain (3R)-3-hydroxyacyl-CoA dehydratase 4 [Anas platyrhynchos]
ENSAPLG00020004179	67.5967	23.9213	-1.49865	8.09e-08	1.27e-06	TMEM175	XP_038026676.1 endosomal/lysosomal potassium channel TMEM175 [Anas platyrhynchos]
ENSAPLG00020002415	7.95133	29.9357	1.9126	8.19e-08	1.29e-06	ASAP3	XP_038023275.1 LOW QUALITY PROTEIN: arf-GAP with SH3 domain, ANK repeat and PH domain-containing protein 3 [Anas platyrhynchos]
ENSAPLG00020007589	221.282	524.403	1.24479	8.28e-08	1.3e-06	Rnf135	AID76934.1 Riplet [Anas platyrhynchos]
ENSAPLG00020017377	28.4847	10.1387	-1.49032	8.32e-08	1.3e-06	D2HGDH	XP_027319913.2 D-2-hydroxyglutarate dehydrogenase, mitochondrial [Anas platyrhynchos]
ENSAPLG00020007473	5.14867	22.1303	2.10375	8.43e-08	1.32e-06	TMEM38A	XP_005029150.2 trimeric intracellular cation channel type A isoform X1 [Anas platyrhynchos]
ENSAPLG00020011602	16.051	4.84867	-1.727	8.48e-08	1.33e-06	FARP1	XP_040394265.1 FERM, ARHGEF and pleckstrin domain-containing protein 1 isoform X1 [Cygnus olor]
ENSAPLG00020010371	0.100333	4.17167	5.37775	8.49e-08	1.33e-06	--	XP_005018366.1 L-amino-acid oxidase [Anas platyrhynchos]
ENSAPLG00020008282	8.71333	1.66467	-2.38799	8.65e-08	1.35e-06	MLLT3	XP_038026892.1 protein AF-9 isoform X1 [Anas platyrhynchos]
MSTRG.76	0.0106667	3.653	8.41983	8.67e-08	1.35e-06	--	EOB08714.1 taxid=8839 hypothetical protein Anapl_10451 [Anas platyrhynchos]
ENSAPLG00020010428	5.66067	0.432333	-3.71076	8.76e-08	1.36e-06	EYA2	XP_027298643.1 eyes absent homolog 2 isoform X1 [Anas platyrhynchos]
ENSAPLG00020000932	7.972	33.715	2.08038	8.82e-08	1.37e-06	CHST7	XP_027302745.1 carbohydrate sulfotransferase 7 [Anas platyrhynchos]
ENSAPLG00020012901	0.001	6.63733	12.6964	8.94e-08	1.39e-06	Pax1	XP_027308976.2 paired box protein Pax-1 [Anas platyrhynchos]
ENSAPLG00020015374	14.0657	3.99933	-1.81435	9.07e-08	1.41e-06	IQGAP3	XP_038023957.1 ras GTPase-activating-like protein IQGAP3 isoform X2 [Anas platyrhynchos]
ENSAPLG00020001949	0.249	5.79933	4.54167	9.08e-08	1.41e-06	PTGER3	XP_021127925.3 prostaglandin E2 receptor EP3 subtype [Anas platyrhynchos]
ENSAPLG00020017726	80.86	32.3383	-1.32218	9.16e-08	1.42e-06	dhcr7	XP_005022826.3 7-dehydrocholesterol reductase isoform X2 [Anas platyrhynchos]
MSTRG.821	88.3633	20.2697	-2.12413	9.27e-08	1.43e-06	MROH1	XP_032038343.1 taxid=219594 maestro heat-like repeat-containing protein family member 1 isoform X1 [Aythya fuligula]
ENSAPLG00020007817	0.001	2.28167	11.1559	9.34e-08	1.44e-06	NPR1	XP_027302647.2 atrial natriuretic peptide receptor 1-like [Anas platyrhynchos]
ENSAPLG00020017669	0.0613333	2.853	5.53966	9.61e-08	1.48e-06	GFPT2	XP_038042456.1 glutamine--fructose-6-phosphate aminotransferase [isomerizing] 2 isoform X3 [Anas platyrhynchos]
ENSAPLG00020014176	66.2233	165.132	1.31821	9.62e-08	1.48e-06	SLC11A2	EOA94604.1 Natural resistance-associated macrophage protein 2, partial [Anas platyrhynchos]
MSTRG.583	19.6877	3.05067	-2.6901	9.79e-08	1.51e-06	PPFIA2	XP_047934817.1 taxid=8845 liprin-alpha-2-like isoform X1 [Anser cygnoides]
ENSAPLG00020011039	0.001	1.93533	10.9184	1e-07	1.54e-06	CD163L1	XP_032060934.1 antigen WC1.1-like [Aythya fuligula]
ENSAPLG00020013732	25.8923	5.04233	-2.36036	1.02e-07	1.56e-06	THSD4	XP_005025485.2 thrombospondin type-1 domain-containing protein 4 isoform X1 [Anas platyrhynchos]
ENSAPLG00020008456	14.355	40.561	1.49854	1.02e-07	1.56e-06	TJP2	XP_040398229.1 tight junction protein ZO-2 isoform X1 [Cygnus olor]
ENSAPLG00020005204	8.35733	29.633	1.82609	1.02e-07	1.56e-06	INPP5F	XP_038036832.1 phosphatidylinositide phosphatase SAC2 isoform X1 [Anas platyrhynchos]
ENSAPLG00020017025	96.628	32.323	-1.57988	1.04e-07	1.59e-06	Glod4	XP_005011926.2 glyoxalase domain-containing protein 4 [Anas platyrhynchos]
ENSAPLG00020015938	0.0876667	3.548	5.33883	1.06e-07	1.62e-06	Ccr4	XP_021124531.1 C-C chemokine receptor type 4 isoform X1 [Anas platyrhynchos]
ENSAPLG00020013123	6.29267	0.417333	-3.9144	1.07e-07	1.63e-06	TMEM98	XP_038024571.1 transmembrane protein 98 [Anas platyrhynchos]
ENSAPLG00020009468	0.558667	5.53467	3.30844	1.09e-07	1.66e-06	GVINP1	XP_032039457.1 interferon-induced very large GTPase 1-like [Aythya fuligula]
ENSAPLG00020011824	39.9103	10.4653	-1.93114	1.11e-07	1.69e-06	TBC1D13	XP_027326672.2 TBC1 domain family member 13 [Anas platyrhynchos]
ENSAPLG00020010732	0.0423333	3.51633	6.37613	1.12e-07	1.7e-06	ERVK-25	XP_038025581.1 uncharacterized protein LOC113840873 isoform X2 [Anas platyrhynchos]
ENSAPLG00020005944	0.719333	5.598	2.96018	1.12e-07	1.7e-06	Fam110a	XP_027328578.2 LOW QUALITY PROTEIN: protein FAM110A [Anas platyrhynchos]
ENSAPLG00020007441	66.0463	228.838	1.79277	1.13e-07	1.72e-06	MAFF	XP_009473475.1 PREDICTED: transcription factor MafF [Nipponia nippon]
ENSAPLG00020014646	19.9177	59.479	1.57833	1.13e-07	1.72e-06	RGS2	XP_032048094.1 regulator of G-protein signaling 2 [Aythya fuligula]
MSTRG.18304	0.044	2.21733	5.65518	1.18e-07	1.79e-06	myoM	XP_038037706.1 taxid=8839 uncharacterized protein LOC101792439 isoform X1 [Anas platyrhynchos]
ENSAPLG00020017030	242.594	69.915	-1.79487	1.21e-07	1.83e-06	ALDH3A2	XP_027328488.2 aldehyde dehydrogenase family 3 member A2-like isoform X3 [Anas platyrhynchos]
ENSAPLG00020010712	85.9953	35.8407	-1.26266	1.21e-07	1.84e-06	Fkbp15	XP_027326371.2 FK506-binding protein 15 isoform X1 [Anas platyrhynchos]
MSTRG.20637	0.001	5.71933	12.4816	1.22e-07	1.84e-06	Cd22	KAI6061817.1 taxid=8832 B-cell receptor CD22 [Aix galericulata]
ENSAPLG00020017583	21.6427	6.23033	-1.7965	1.23e-07	1.87e-06	PCBD2	XP_009585215.1 PREDICTED: pterin-4-alpha-carbinolamine dehydratase 2, partial [Fulmarus glacialis]
ENSAPLG00020011351	3.938	26.171	2.73243	1.23e-07	1.87e-06	NEURL1	XP_027315692.1 E3 ubiquitin-protein ligase NEURL1 isoform X1 [Anas platyrhynchos]
MSTRG.13063	21.0447	103.231	2.29435	1.24e-07	1.87e-06	--	NWZ30868.1 taxid=75869 SETBP protein [Asarcornis scutulata]
ENSAPLG00020010252	17.4537	6.20033	-1.49311	1.24e-07	1.87e-06	EXD3	XP_038043954.1 exonuclease mut-7 homolog isoform X1 [Anas platyrhynchos]
ENSAPLG00020009631	0.476	4.09533	3.10495	1.25e-07	1.89e-06	ETV4	XP_032058660.1 ETS translocation variant 4 isoform X1 [Aythya fuligula]
ENSAPLG00020007411	0.0553333	7.83533	7.1457	1.26e-07	1.89e-06	SULT2B1	XP_027322221.2 LOW QUALITY PROTEIN: sulfotransferase 2B1-like [Anas platyrhynchos]
ENSAPLG00020000736	33.708	86.279	1.35592	1.26e-07	1.89e-06	Pdlim5	XP_027311390.1 PDZ and LIM domain protein 5 isoform X18 [Anas platyrhynchos]
ENSAPLG00020009344	7.737	37.3167	2.26997	1.28e-07	1.92e-06	IL7R	XP_005017208.1 interleukin-7 receptor subunit alpha isoform X2 [Anas platyrhynchos]
ENSAPLG00020004532	83.5733	243.123	1.54057	1.28e-07	1.92e-06	HPSE	EOB05768.1 Heparanase, partial [Anas platyrhynchos]
ENSAPLG00020016331	21.1397	61.3863	1.53796	1.28e-07	1.92e-06	CASP1	XP_027301817.2 caspase-1 isoform X1 [Anas platyrhynchos]
ENSAPLG00020004189	5.41233	23.6123	2.12522	1.29e-07	1.93e-06	EGR3	XP_032060035.1 early growth response protein 3 [Aythya fuligula]
ENSAPLG00020004304	262.953	110.511	-1.25061	1.31e-07	1.97e-06	Comt	XP_005024438.1 catechol O-methyltransferase isoform X1 [Anas platyrhynchos]
ENSAPLG00020007603	0.001	3.30733	11.6915	1.32e-07	1.97e-06	Golph3	XP_027304756.1 Golgi phosphoprotein 3-like isoform X1 [Anas platyrhynchos]
MSTRG.15794	64.3837	25.674	-1.32639	1.33e-07	1.99e-06	--	XP_038034059.1 taxid=8839 uncharacterized protein LOC101793952 isoform X2 [Anas platyrhynchos]
ENSAPLG00020001241	65.209	21.9303	-1.57214	1.34e-07	2e-06	HS1BP3	XP_027311106.2 HCLS1-binding protein 3 isoform X1 [Anas platyrhynchos]
ENSAPLG00020007729	45.0677	15.3553	-1.55335	1.4e-07	2.09e-06	POLR1B	XP_038032334.1 DNA-directed RNA polymerase I subunit RPA2-like [Anas platyrhynchos]
ENSAPLG00020008530	46.8237	17.451	-1.42393	1.43e-07	2.12e-06	RPS6KC1	XP_027309513.2 ribosomal protein S6 kinase delta-1 isoform X1 [Anas platyrhynchos]
MSTRG.3044	134.87	52.729	-1.3549	1.46e-07	2.17e-06	CCDC90B	NXU87134.1 taxid=269412 CC90B protein [Xiphorhynchus elegans]
MSTRG.13887	0.001	1.81367	10.8247	1.46e-07	2.17e-06	--	-
ENSAPLG00020006397	48.0313	12.165	-1.98124	1.48e-07	2.19e-06	Hgsnat	XP_027311927.2 heparan-alpha-glucosaminide N-acetyltransferase [Anas platyrhynchos]
MSTRG.21714	0.001	4.46867	12.1256	1.52e-07	2.26e-06	--	-
ENSAPLG00020013150	3.40233	14.2337	2.06471	1.54e-07	2.28e-06	STING1	XP_027323921.2 stimulator of interferon genes protein isoform X1 [Anas platyrhynchos]
ENSAPLG00020000772	2.597	90.8983	5.12934	1.54e-07	2.28e-06	HPGDS	XP_005024474.1 hematopoietic prostaglandin D synthase [Anas platyrhynchos]
ENSAPLG00020011466	44.5607	15.2217	-1.54964	1.54e-07	2.28e-06	MYO10	XP_038029878.1 LOW QUALITY PROTEIN: unconventional myosin-X [Anas platyrhynchos]
ENSAPLG00020007129	0.001	2.84633	11.4749	1.59e-07	2.35e-06	TMEM108	XP_027305960.2 transmembrane protein 108 isoform X1 [Anas platyrhynchos]
ENSAPLG00020014676	0.782667	7.14067	3.18959	1.62e-07	2.39e-06	MMRN2	XP_005026304.1 multimerin-2 isoform X2 [Anas platyrhynchos]
ENSAPLG00020000209	215.363	89.051	-1.27406	1.63e-07	2.41e-06	KAT2B	XP_038031533.1 LOW QUALITY PROTEIN: histone acetyltransferase KAT2B [Anas platyrhynchos]
ENSAPLG00020011020	0.001	2.42467	11.2436	1.67e-07	2.46e-06	MIER3	XP_027304716.1 mesoderm induction early response protein 3-like isoform X1 [Anas platyrhynchos]
ENSAPLG00020007178	108.533	262.971	1.27677	1.68e-07	2.47e-06	--	XP_005021265.1 lymphocyte antigen 96 [Anas platyrhynchos]
ENSAPLG00020008983	42.5293	13.5387	-1.65137	1.69e-07	2.49e-06	--	XP_021124230.2 uncharacterized protein LOC101793077 [Anas platyrhynchos]
ENSAPLG00020007121	0.029	4.457	7.26388	1.69e-07	2.49e-06	GSC	XP_027314932.1 homeobox protein goosecoid isoform X1 [Anas platyrhynchos]
ENSAPLG00020000314	0.208333	3.375	4.01792	1.7e-07	2.49e-06	Gvin1	XP_032039457.1 interferon-induced very large GTPase 1-like [Aythya fuligula]
ENSAPLG00020016968	113.034	36.2457	-1.64088	1.72e-07	2.53e-06	COLEC12	XP_027307779.2 collectin-12 isoform X2 [Anas platyrhynchos]
ENSAPLG00020007017	0.363667	6.95133	4.2566	1.73e-07	2.53e-06	FOXS1	XP_032054294.1 forkhead box protein S1 [Aythya fuligula]
ENSAPLG00020011670	496.348	167.107	-1.57058	1.75e-07	2.56e-06	VASH1	XP_027314241.1 tubulinyl-Tyr carboxypeptidase 1 [Anas platyrhynchos]
ENSAPLG00020006616	43.0247	14.129	-1.6065	1.79e-07	2.62e-06	WWP1	XP_027308235.1 NEDD4-like E3 ubiquitin-protein ligase WWP1 isoform X1 [Anas platyrhynchos]
ENSAPLG00020015925	260.049	548.895	1.07775	1.82e-07	2.66e-06	SAMHD1	XP_027328695.2 deoxynucleoside triphosphate triphosphohydrolase SAMHD1 isoform X1 [Anas platyrhynchos]
ENSAPLG00020016432	7.01067	40.05	2.51418	1.83e-07	2.67e-06	PSPH	XP_005010718.1 phosphoserine phosphatase isoform X1 [Anas platyrhynchos]
ENSAPLG00020000069	11.596	54.9323	2.24403	1.95e-07	2.84e-06	PRKCQ	XP_038043841.1 protein kinase C theta type [Anas platyrhynchos]
ENSAPLG00020004636	0.603667	4.68567	2.95643	1.95e-07	2.84e-06	Tmprss2	XP_021132301.3 transmembrane protease serine 2 [Anas platyrhynchos]
ENSAPLG00020005809	45.4947	121.522	1.41745	1.96e-07	2.85e-06	Ranbp2	XP_032044246.1 ranBP2-like and GRIP domain-containing protein 3 [Aythya fuligula]
ENSAPLG00020016012	2.764	11.3657	2.03985	1.97e-07	2.86e-06	pol	XP_014810274.1 PREDICTED: uncharacterized protein LOC106895380 [Calidris pugnax]
ENSAPLG00020008123	8.031	23.5157	1.54997	2e-07	2.9e-06	Sacs	XP_027325016.1 sacsin isoform X3 [Anas platyrhynchos]
ENSAPLG00020011826	493.531	186.342	-1.40519	2.01e-07	2.91e-06	Slc15a4	XP_005018194.2 solute carrier family 15 member 4 isoform X1 [Anas platyrhynchos]
ENSAPLG00020010924	0.622667	13.926	4.48318	2.04e-07	2.95e-06	--	XP_005017846.3 B- and T-lymphocyte attenuator isoform X1 [Anas platyrhynchos]
ENSAPLG00020008029	62.2157	19.7237	-1.65735	2.05e-07	2.97e-06	Pdk1	XP_035188365.1 pyruvate dehydrogenase (acetyl-transferring) kinase isozyme 1, mitochondrial [Oxyura jamaicensis]
MSTRG.4252	13.8807	1.73733	-2.99813	2.05e-07	2.97e-06	gag-pro-pol	OPJ83304.1 taxid=372326 endogenous retrovirus group K member 18 Pol protein-like [Patagioenas fasciata monilis]
ENSAPLG00020005042	142.313	56.33	-1.3371	2.1e-07	3.03e-06	DOP1B	XP_027304929.2 protein dopey-2 isoform X1 [Anas platyrhynchos]
ENSAPLG00020015536	4.56133	29.8973	2.71249	2.11e-07	3.04e-06	CD247	XP_005017667.3 T-cell surface glycoprotein CD3 zeta chain [Anas platyrhynchos]
ENSAPLG00020018403	95.285	31.3453	-1.604	2.14e-07	3.08e-06	Man1b1	XP_027326952.2 endoplasmic reticulum mannosyl-oligosaccharide 1,2-alpha-mannosidase isoform X1 [Anas platyrhynchos]
ENSAPLG00020012959	187.925	73.0497	-1.36321	2.16e-07	3.11e-06	SLC1A6	XP_005015675.2 excitatory amino acid transporter 4-like isoform X3 [Anas platyrhynchos]
MSTRG.19153	11332.7	4252.03	-1.41427	2.18e-07	3.13e-06	--	-
ENSAPLG00020013863	12.612	55.8703	2.14729	2.19e-07	3.14e-06	Stk17b	XP_027317616.1 LOW QUALITY PROTEIN: serine/threonine-protein kinase 17B [Anas platyrhynchos]
MSTRG.17470	79.114	31.7763	-1.31598	2.19e-07	3.15e-06	ZFYVE26	XP_027313761.2 taxid=8839 zinc finger FYVE domain-containing protein 26 isoform X1 [Anas platyrhynchos]
ENSAPLG00020007712	582.113	239.886	-1.27895	2.23e-07	3.19e-06	ARSB	XP_038027283.1 arylsulfatase B [Anas platyrhynchos]
ENSAPLG00020016394	122.774	51.0893	-1.26491	2.23e-07	3.19e-06	DHCR24	XP_027318219.1 delta(24)-sterol reductase [Anas platyrhynchos]
ENSAPLG00020001336	8.04867	27.142	1.75371	2.26e-07	3.24e-06	Ssh3	XP_032043841.1 protein phosphatase Slingshot homolog 3 [Aythya fuligula]
ENSAPLG00020017000	0.296333	4.431	3.90234	2.27e-07	3.24e-06	MSLNL	XP_038043092.1 mesothelin-like protein [Anas platyrhynchos]
ENSAPLG00020013568	47.2527	16.2987	-1.53564	2.31e-07	3.3e-06	SEC31B	XP_012960216.1 protein transport protein Sec31B isoform X1 [Anas platyrhynchos]
ENSAPLG00020010406	37.859	94.4737	1.31928	2.32e-07	3.31e-06	S100A11	XP_032060374.1 protein S100-A11 [Aythya fuligula]
ENSAPLG00020014555	41.1647	140.366	1.76972	2.34e-07	3.34e-06	CITED3	XP_027299884.1 cbp/p300-interacting transactivator 4 [Anas platyrhynchos]
MSTRG.21761	38.6993	9.75367	-1.98829	2.39e-07	3.4e-06	NREP	XP_009872460.1 taxid=57397 PREDICTED: uncharacterized protein LOC104277510, partial [Apaloderma vittatum]
ENSAPLG00020000191	475.93	28.343	-4.06968	2.44e-07	3.47e-06	TYR	EOA94303.1 Tyrosinase, partial [Anas platyrhynchos]
ENSAPLG00020016642	138.789	47.0077	-1.56193	2.45e-07	3.48e-06	UHRF1BP1	XP_027300687.2 LOW QUALITY PROTEIN: UHRF1-binding protein 1 [Anas platyrhynchos]
ENSAPLG00020009928	53.3463	22.3943	-1.25226	2.45e-07	3.48e-06	NCOR2	XP_032054636.1 nuclear receptor corepressor 2 isoform X11 [Aythya fuligula]
ENSAPLG00020015514	0.264667	3.26533	3.62498	2.52e-07	3.57e-06	BEND4	XP_041909797.1 BEN domain-containing protein 4 [Corvus kubaryi]
ENSAPLG00020010768	53.984	19.714	-1.45331	2.52e-07	3.57e-06	PM20D1	XP_027300887.2 N-fatty-acyl-amino acid synthase/hydrolase PM20D1 isoform X1 [Anas platyrhynchos]
ENSAPLG00020000849	25.285	7.38067	-1.77646	2.53e-07	3.58e-06	Abcg1	XP_005030527.1 ATP-binding cassette sub-family G member 1 [Anas platyrhynchos]
ENSAPLG00020003522	79.7953	29.321	-1.44437	2.54e-07	3.59e-06	OSBPL5	XP_035395973.1 oxysterol-binding protein-related protein 5 isoform X1 [Cygnus atratus]
MSTRG.1888	0.384333	3.717	3.27371	2.57e-07	3.64e-06	--	-
ENSAPLG00020017473	4.563	0.310667	-3.87654	2.58e-07	3.64e-06	SGIP1	XP_032047994.1 SH3-containing GRB2-like protein 3-interacting protein 1 isoform X1 [Aythya fuligula]
MSTRG.17244	9.19733	25.679	1.4813	2.58e-07	3.65e-06	PITPNM1	XP_038035589.1 taxid=8839 membrane-associated phosphatidylinositol transfer protein 1 [Anas platyrhynchos]
ENSAPLG00020017454	6.307	0.999333	-2.65792	2.59e-07	3.65e-06	EFCAB7	XP_005022944.3 EF-hand calcium-binding domain-containing protein 7 [Anas platyrhynchos]
ENSAPLG00020003887	238.901	96.4383	-1.30873	2.6e-07	3.66e-06	Snx2	XP_038026497.1 sorting nexin-2 isoform X1 [Anas platyrhynchos]
ENSAPLG00020000921	4.91167	0.001	-12.262	2.63e-07	3.7e-06	--	XP_035425616.1 palmitoyltransferase ZDHHC21 isoform X1 [Cygnus atratus]
ENSAPLG00020006647	58.5107	11.2753	-2.37553	2.65e-07	3.73e-06	ANO6	XP_027312580.2 anoctamin-6 isoform X1 [Anas platyrhynchos]
ENSAPLG00020000285	97.403	245.23	1.3321	2.66e-07	3.73e-06	NCF4	XP_005016050.1 neutrophil cytosol factor 4 isoform X1 [Anas platyrhynchos]
ENSAPLG00020007230	1755.49	770.038	-1.18888	2.72e-07	3.82e-06	DNASE2B	XP_021130005.1 deoxyribonuclease-2-beta [Anas platyrhynchos]
MSTRG.13611	0.0273333	2.36	6.43198	2.74e-07	3.85e-06	--	-
ENSAPLG00020000850	4.60633	0.273667	-4.07313	2.76e-07	3.87e-06	Acss3	XP_027307136.2 acyl-CoA synthetase short-chain family member 3, mitochondrial isoform X1 [Anas platyrhynchos]
ENSAPLG00020016561	199.416	69.3223	-1.52439	2.77e-07	3.87e-06	NFATC3	XP_027322953.1 nuclear factor of activated T-cells, cytoplasmic 3 isoform X1 [Anas platyrhynchos]
ENSAPLG00020001536	13.3837	2.524	-2.40669	2.78e-07	3.89e-06	EFHC1	XP_027311171.2 EF-hand domain-containing protein 1 [Anas platyrhynchos]
ENSAPLG00020009088	0.001	4.093	11.9989	2.81e-07	3.92e-06	Gcnt1	XP_035414439.1 beta-1,3-galactosyl-O-glycosyl-glycoprotein beta-1,6-N-acetylglucosaminyltransferase [Cygnus atratus]
ENSAPLG00020014525	0.279667	4.75133	4.08655	2.81e-07	3.93e-06	SMAD2	XP_038025520.1 mothers against decapentaplegic homolog 2 isoform X1 [Anas platyrhynchos]
ENSAPLG00020006640	3.25033	0.183	-4.15067	2.86e-07	4e-06	COLGALT2	XP_027319355.1 procollagen galactosyltransferase 2 isoform X1 [Anas platyrhynchos]
ENSAPLG00020007468	5.32667	22.4753	2.07704	2.93e-07	4.09e-06	CASP7	XP_005014501.2 caspase-7 isoform X1 [Anas platyrhynchos]
ENSAPLG00020013254	45.3373	16.846	-1.42829	2.96e-07	4.12e-06	Man1a1	XP_035394521.1 mannosyl-oligosaccharide 1,2-alpha-mannosidase IA [Cygnus atratus]
ENSAPLG00020018068	139.745	305.178	1.12685	2.97e-07	4.14e-06	Gsdma2	XP_027301035.1 gasdermin-A [Anas platyrhynchos]
ENSAPLG00020009201	15.9107	48.7323	1.61489	2.99e-07	4.16e-06	--	XP_038023791.1 extracellular matrix protein 1 [Anas platyrhynchos]
ENSAPLG00020016950	0.054	8.39233	7.27997	3e-07	4.17e-06	IL10	XP_035203034.1 interleukin-10 isoform X1 [Oxyura jamaicensis]
ENSAPLG00020017357	56.9317	138.28	1.28029	3.02e-07	4.19e-06	ERO1A	EOA96356.1 ERO1-like protein alpha, partial [Anas platyrhynchos]
ENSAPLG00020007285	0.749333	12.1257	4.01631	3.07e-07	4.25e-06	CD226	XP_021122680.1 CD226 antigen isoform X1 [Anas platyrhynchos]
ENSAPLG00020013726	368.541	124.108	-1.57023	3.11e-07	4.3e-06	cyp3a40	XP_005020173.2 cytochrome P450 3A30 isoform X1 [Anas platyrhynchos]
ENSAPLG00020016164	58.9257	21.5857	-1.44882	3.12e-07	4.32e-06	Arrdc1	XP_027326572.1 LOW QUALITY PROTEIN: arrestin domain-containing protein 1 [Anas platyrhynchos]
ENSAPLG00020001606	0.852333	12.1763	3.83652	3.19e-07	4.42e-06	Il17f	NP_001297735.1 interleukin-17F precursor [Anas platyrhynchos]
ENSAPLG00020006064	1.44567	7.866	2.4439	3.21e-07	4.43e-06	CDH17	EOA93934.1 Cadherin-17, partial [Anas platyrhynchos]
ENSAPLG00020002032	7.572	1.58633	-2.25498	3.27e-07	4.51e-06	LRP4	EOB05435.1 Low-density lipoprotein receptor-related protein 4, partial [Anas platyrhynchos]
ENSAPLG00020016610	54.0973	141.031	1.38238	3.29e-07	4.54e-06	Osgin1	XP_038041228.1 oxidative stress-induced growth inhibitor 1 [Anas platyrhynchos]
ENSAPLG00020007742	19.132	2.99367	-2.676	3.31e-07	4.55e-06	Havcr1	XP_038042462.1 LOW QUALITY PROTEIN: T-cell immunoglobulin and mucin domain-containing protein 4 [Anas platyrhynchos]
MSTRG.3392	1.25533	6.757	2.42831	3.34e-07	4.59e-06	--	-
ENSAPLG00020010227	116.874	44.5773	-1.39057	3.45e-07	4.74e-06	FAR1	XP_027317119.1 fatty acyl-CoA reductase 1 [Anas platyrhynchos]
ENSAPLG00020014663	0.273333	6.98	4.67449	3.79e-07	5.21e-06	RGS5	XP_032048583.1 regulator of G-protein signaling 5 isoform X1 [Aythya fuligula]
ENSAPLG00020004320	70.4037	26.0477	-1.4345	3.8e-07	5.22e-06	PTDSS1	XP_021132939.2 phosphatidylserine synthase 1 isoform X1 [Anas platyrhynchos]
MSTRG.14424	0.001	1.88	10.8765	3.85e-07	5.28e-06	--	-
ENSAPLG00020005053	116.748	46.2223	-1.33674	3.89e-07	5.32e-06	RMND5A	XP_010211113.1 PREDICTED: protein RMD5 homolog A [Tinamus guttatus]
MSTRG.17913	6.073	1.56367	-1.95748	3.9e-07	5.34e-06	--	-
ENSAPLG00020014922	0.001	1.54	10.5887	3.95e-07	5.39e-06	PDE4D	XP_027328178.2 cAMP-specific 3',5'-cyclic phosphodiesterase 4C isoform X2 [Anas platyrhynchos]
ENSAPLG00020005831	0.0696667	6.88367	6.62656	3.96e-07	5.41e-06	IGHV3-23	XP_032063102.1 immunoglobulin gamma-1 heavy chain-like [Aythya fuligula]
ENSAPLG00020007663	14.4113	45.4117	1.65586	3.98e-07	5.43e-06	DDA1	XP_009484689.1 PREDICTED: DET1- and DDB1-associated protein 1 [Pelecanus crispus]
ENSAPLG00020015100	213.052	67.149	-1.66577	3.99e-07	5.44e-06	Mcoln1	XP_038025247.1 mucolipin-1-like isoform X1 [Anas platyrhynchos]
ENSAPLG00020001561	302.419	124.652	-1.27865	4.03e-07	5.49e-06	NHLRC3	XP_038034767.1 NHL repeat-containing protein 3 [Anas platyrhynchos]
ENSAPLG00020016653	10.299	30.228	1.55338	4.14e-07	5.63e-06	SMAD6	XP_040425636.1 mothers against decapentaplegic homolog 6 isoform X1 [Cygnus olor]
ENSAPLG00020008320	10.5927	28.358	1.42069	4.17e-07	5.67e-06	Mfng	XP_038027623.1 beta-1,3-N-acetylglucosaminyltransferase manic fringe isoform X2 [Anas platyrhynchos]
MSTRG.4402	0.0393333	2.17533	5.78934	4.18e-07	5.68e-06	--	KAI6078040.1 taxid=8832 hypothetical protein LUU34_00711600 [Aix galericulata]
ENSAPLG00020013203	13.1663	42.1593	1.679	4.19e-07	5.68e-06	ETS1	XP_005019707.4 protein C-ets-1 isoform X2 [Anas platyrhynchos]
ENSAPLG00020017602	0.115	1.51367	3.71834	4.21e-07	5.7e-06	MYH11	XP_032053789.1 myosin-11 isoform X2 [Aythya fuligula]
ENSAPLG00020005355	1.06	8.14867	2.9425	4.23e-07	5.73e-06	TUBB3	XP_005010451.1 tubulin beta-1 chain isoform X1 [Anas platyrhynchos]
ENSAPLG00020000557	9.60533	75.0847	2.96661	4.25e-07	5.75e-06	SAA1	P02740.2 RecName: Full=Serum amyloid A protein; Short=SAA; Flags: Precursor [Anas platyrhynchos]
ENSAPLG00020001958	0.864	6.21667	2.84704	4.25e-07	5.75e-06	ODF3	XP_038036402.1 outer dense fiber protein 3-like [Anas platyrhynchos]
ENSAPLG00020017755	0.0183333	2.236	6.93031	4.34e-07	5.86e-06	FLT4	XP_027324368.2 LOW QUALITY PROTEIN: vascular endothelial growth factor receptor 3 [Anas platyrhynchos]
ENSAPLG00020000719	14.8597	69.9773	2.23549	4.34e-07	5.86e-06	SAMSN1	XP_032054155.1 SAM domain-containing protein SAMSN-1-like isoform X2 [Aythya fuligula]
ENSAPLG00020018352	81.5557	28.7827	-1.50258	4.35e-07	5.86e-06	DENND2A	XP_005021556.1 DENN domain-containing protein 2A [Anas platyrhynchos]
ENSAPLG00020001651	0.001	2.71467	11.4066	4.35e-07	5.86e-06	MPL	XP_038038774.1 LOW QUALITY PROTEIN: thrombopoietin receptor [Anas platyrhynchos]
ENSAPLG00020006958	0.295667	6.70233	4.50262	4.39e-07	5.91e-06	VNN1	XP_038033216.1 pantetheinase isoform X2 [Anas platyrhynchos]
ENSAPLG00020004090	48.5783	15.8383	-1.61689	4.41e-07	5.93e-06	Gmip	XP_040398406.1 GEM-interacting protein isoform X4 [Cygnus olor]
MSTRG.2749	1.132	7.12733	2.65449	4.47e-07	6.01e-06	--	EOB04535.1 taxid=8839 hypothetical protein Anapl_09267 [Anas platyrhynchos]
ENSAPLG00020001482	10.3997	59.847	2.52474	4.53e-07	6.08e-06	PHLDA2	XP_009287156.1 PREDICTED: pleckstrin homology-like domain family A member 2 [Aptenodytes forsteri]
ENSAPLG00020013909	112.907	334.94	1.56876	4.55e-07	6.1e-06	TUBB6	XP_027307871.1 tubulin beta-6 chain [Anas platyrhynchos]
ENSAPLG00020016199	90.0407	214.692	1.25362	4.69e-07	6.28e-06	SEMA7A	XP_027322107.1 LOW QUALITY PROTEIN: semaphorin-7A [Anas platyrhynchos]
MSTRG.6486	0.649	7.26033	3.48375	4.71e-07	6.3e-06	Lime1	XP_027328865.2 taxid=8839 lck-interacting transmembrane adapter 1 [Anas platyrhynchos]
ENSAPLG00020015814	65.7673	22.7103	-1.53402	4.81e-07	6.44e-06	TRMU	XP_027314629.1 mitochondrial tRNA-specific 2-thiouridylase 1 [Anas platyrhynchos]
ENSAPLG00020010492	179.847	68.7437	-1.38747	4.89e-07	6.54e-06	PSEN2	XP_027309472.1 presenilin-2 isoform X1 [Anas platyrhynchos]
ENSAPLG00020012458	4.99433	19.6517	1.97629	4.9e-07	6.54e-06	CYTIP	XP_032045966.1 cytohesin-interacting protein [Aythya fuligula]
ENSAPLG00020010742	177.476	51.8477	-1.77527	4.91e-07	6.54e-06	CMLKR1	XP_038043317.1 chemokine-like receptor 1 [Anas platyrhynchos]
MSTRG.12789	7.34867	50.3253	2.77573	4.92e-07	6.55e-06	NUGGC	XP_032040420.1 taxid=219594 nuclear GTPase SLIP-GC-like [Aythya fuligula]
ENSAPLG00020017303	32.2507	74.6617	1.21104	4.92e-07	6.55e-06	Jade2	XP_032052802.1 E3 ubiquitin-protein ligase Jade-2 isoform X1 [Aythya fuligula]
MSTRG.9070	0.0203333	3.21433	7.30453	4.95e-07	6.58e-06	--	-
ENSAPLG00020018393	7.94833	1.141	-2.80035	5.03e-07	6.69e-06	FGD2	XP_038020986.1 FYVE, RhoGEF and PH domain-containing protein 2 isoform X7 [Anas platyrhynchos]
ENSAPLG00020004326	59.0933	17.5227	-1.75377	5.04e-07	6.7e-06	TBC1D16	XP_038021400.1 TBC1 domain family member 16 isoform X1 [Anas platyrhynchos]
ENSAPLG00020009917	28.1853	100.968	1.84088	5.06e-07	6.71e-06	UBB	KAG9262945.1 scavenger receptor class B member 1 [Astyanax mexicanus]
ENSAPLG00020013587	0.134667	9.28467	6.10739	5.06e-07	6.71e-06	Ubxn11	XP_027299683.2 UBX domain-containing protein 11 isoform X3 [Anas platyrhynchos]
ENSAPLG00020014537	0.001	1.76633	10.7865	5.11e-07	6.77e-06	ZBTB5	XP_038025456.1 zinc finger and BTB domain-containing protein 5-like isoform X1 [Anas platyrhynchos]
ENSAPLG00020016856	53.4527	18.954	-1.49576	5.15e-07	6.82e-06	CHEK2	XP_038043411.1 serine/threonine-protein kinase Chk2 isoform X2 [Anas platyrhynchos]
ENSAPLG00020006956	36.9523	14.2657	-1.37312	5.21e-07	6.89e-06	FAAH	XP_027305427.2 LOW QUALITY PROTEIN: fatty acid amide hydrolase, partial [Anas platyrhynchos]
ENSAPLG00020017088	0.449667	3.79333	3.07654	5.3e-07	7.01e-06	FARP2	XP_032049241.1 FERM, ARHGEF and pleckstrin domain-containing protein 2 isoform X1 [Aythya fuligula]
ENSAPLG00020004498	13.2313	3.916	-1.75651	5.4e-07	7.12e-06	TMEM154	XP_021129005.1 transmembrane protein 154 isoform X2 [Anas platyrhynchos]
ENSAPLG00020007076	0.457667	2.87333	2.65036	5.42e-07	7.14e-06	SYNJ2	XP_027310207.2 synaptojanin-2 isoform X5 [Anas platyrhynchos]
ENSAPLG00020018073	14.7633	58.149	1.97774	5.46e-07	7.2e-06	NT5DC3	XP_035420075.1 5'-nucleotidase domain-containing protein 3 [Cygnus atratus]
ENSAPLG00020013025	148.242	56.1917	-1.39953	5.5e-07	7.24e-06	Kif1b	XP_038022677.1 kinesin-like protein KIF1B isoform X3 [Anas platyrhynchos]
MSTRG.14124	1.84267	10.5127	2.51226	5.51e-07	7.24e-06	--	PKU36123.1 taxid=1758121 aryl hydrocarbon receptor nuclear translocator-like protein 2 isoform x1 [Limosa lapponica baueri]
ENSAPLG00020015012	0.919	4.31667	2.23178	5.58e-07	7.33e-06	DAB2IP	XP_027326576.1 disabled homolog 2-interacting protein isoform X3 [Anas platyrhynchos]
ENSAPLG00020008997	0.134	1.801	3.74849	5.63e-07	7.39e-06	LAMA4	XP_038031871.1 laminin subunit alpha-4 [Anas platyrhynchos]
ENSAPLG00020001883	240.381	536.758	1.15895	5.66e-07	7.43e-06	ZYX	XP_038036159.1 zyxin [Anas platyrhynchos]
ENSAPLG00020012016	0.001	1.481	10.5324	5.8e-07	7.6e-06	ITGA2B	XP_038024818.1 integrin alpha-IIb [Anas platyrhynchos]
ENSAPLG00020009574	25.1667	8.30233	-1.59993	5.97e-07	7.82e-06	OXCT1	XP_032061260.1 succinyl-CoA:3-ketoacid coenzyme A transferase 1, mitochondrial [Aythya fuligula]
MSTRG.2122	18.3167	52.731	1.52549	5.99e-07	7.83e-06	--	XP_035401957.1 taxid=8868 uncharacterized protein LOC118247801 [Cygnus atratus]
ENSAPLG00020003146	212.155	90.155	-1.23464	6.01e-07	7.85e-06	nsmce1	XP_005018660.1 non-structural maintenance of chromosomes element 1 homolog isoform X1 [Anas platyrhynchos]
ENSAPLG00020000185	0.053	3.35533	5.98432	6.02e-07	7.87e-06	lgr5-a	XP_038020816.1 leucine-rich repeat-containing G-protein coupled receptor 5 isoform X1 [Anas platyrhynchos]
ENSAPLG00020003725	3.98067	16.2933	2.0332	6.17e-07	8.05e-06	ADAMTSL2	XP_027326591.1 ADAMTS-like protein 2 isoform X3 [Anas platyrhynchos]
ENSAPLG00020006574	57.9037	22.1407	-1.38696	6.2e-07	8.09e-06	Edem3	XP_027319450.1 ER degradation-enhancing alpha-mannosidase-like protein 3 isoform X1 [Anas platyrhynchos]
ENSAPLG00020013965	6.61333	20.565	1.63674	6.23e-07	8.11e-06	nr4a1	XP_040395676.1 nuclear receptor subfamily 4 group A member 1 [Cygnus olor]
ENSAPLG00020012854	36.86	14.421	-1.35388	6.26e-07	8.14e-06	MTOR	XP_035200269.1 serine/threonine-protein kinase mTOR isoform X1 [Oxyura jamaicensis]
ENSAPLG00020018185	7.78033	42.524	2.45037	6.27e-07	8.16e-06	LPAR6	XP_038022554.1 lysophosphatidic acid receptor 6 [Anas platyrhynchos]
ENSAPLG00020008692	0.757333	6.00567	2.98732	6.33e-07	8.22e-06	smpd5	XP_040403463.1 sphingomyelin phosphodiesterase 5-like isoform X1 [Cygnus olor]
ENSAPLG00020012973	0.210333	4.013	4.25393	6.59e-07	8.55e-06	--	XP_012951337.3 platelet glycoprotein Ib alpha chain isoform X1 [Anas platyrhynchos]
ENSAPLG00020007099	8.77067	1.985	-2.14355	6.59e-07	8.55e-06	CLSPN	XP_038023105.1 LOW QUALITY PROTEIN: claspin [Anas platyrhynchos]
ENSAPLG00020006103	16.5457	54.2583	1.71339	6.6e-07	8.55e-06	PHIP	XP_032039888.1 PH-interacting protein isoform X1 [Aythya fuligula]
ENSAPLG00020009058	89.9993	35.6993	-1.33402	6.68e-07	8.65e-06	UTP15	XP_027302237.1 U3 small nucleolar RNA-associated protein 15 homolog [Anas platyrhynchos]
ENSAPLG00020012005	0.612667	6.87733	3.48868	6.72e-07	8.7e-06	fzd2	XP_027301588.2 frizzled-2 [Anas platyrhynchos]
ENSAPLG00020012483	348.144	125.491	-1.4721	6.73e-07	8.7e-06	SLC6A6	XP_027323287.1 sodium- and chloride-dependent taurine transporter isoform X3 [Anas platyrhynchos]
ENSAPLG00020005898	20.147	6.16167	-1.70917	6.77e-07	8.74e-06	RAB11FIP2	XP_005021172.1 rab11 family-interacting protein 2 [Anas platyrhynchos]
ENSAPLG00020002586	128.062	51.39	-1.31729	6.86e-07	8.85e-06	SYK	XP_038026980.1 tyrosine-protein kinase SYK [Anas platyrhynchos]
ENSAPLG00020007863	0.001	1.541	10.5897	6.91e-07	8.91e-06	TSHZ1	XP_038030891.1 LOW QUALITY PROTEIN: teashirt homolog 1 [Anas platyrhynchos]
ENSAPLG00020012385	0.001	2.19067	11.0972	7.02e-07	9.04e-06	CRLF1	XP_032059813.1 cytokine receptor-like factor 1 [Aythya fuligula]
ENSAPLG00020010833	333.75	119.79	-1.47826	7.11e-07	9.14e-06	BACE2	XP_032037326.1 beta-secretase 2 [Aythya fuligula]
ENSAPLG00020016776	14.128	58.883	2.05929	7.11e-07	9.14e-06	RCJMB04_21h11	XP_038043455.1 LOW QUALITY PROTEIN: uncharacterized protein KIAA1671 homolog [Anas platyrhynchos]
ENSAPLG00020000540	22.2653	7.10733	-1.64742	7.11e-07	9.14e-06	TBC1D5	EOA96840.1 TBC1 domain family member 5, partial [Anas platyrhynchos]
ENSAPLG00020010784	14.662	50.4873	1.78384	7.21e-07	9.25e-06	AGO3	XP_005142594.1 protein argonaute-3 [Melopsittacus undulatus]
ENSAPLG00020001148	0.001	10.291	13.3291	7.37e-07	9.45e-06	--	XP_038037554.1 ciliary-associated calcium-binding coiled-coil protein 1 isoform X3 [Anas platyrhynchos]
ENSAPLG00020016398	0.0823333	11.142	7.08032	7.48e-07	9.58e-06	--	XP_012957717.1 tumor necrosis factor ligand superfamily member 8 [Anas platyrhynchos]
ENSAPLG00020013016	18.4347	85.0597	2.20605	7.53e-07	9.64e-06	IL22RA2	XP_012953195.3 interleukin-22 receptor subunit alpha-2 [Anas platyrhynchos]
MSTRG.2461	0.044	4.17633	6.56859	7.54e-07	9.64e-06	--	-
ENSAPLG00020002875	45.9713	105.911	1.20404	7.59e-07	9.7e-06	MYO1G	XP_032039179.1 unconventional myosin-Ig [Aythya fuligula]
ENSAPLG00020007897	62.7527	221.219	1.81772	7.78e-07	9.93e-06	ACSL1	XP_027312086.1 long-chain-fatty-acid--CoA ligase 1 [Anas platyrhynchos]
ENSAPLG00020012007	16.039	35.6363	1.15176	7.8e-07	9.96e-06	BCOR	XP_027304808.2 BCL-6 corepressor isoform X1 [Anas platyrhynchos]
ENSAPLG00020016433	51.611	19.422	-1.40999	7.83e-07	9.98e-06	Rcc2	XP_032057232.1 protein RCC2 [Aythya fuligula]
ENSAPLG00020016490	0.620667	4.01433	2.69327	7.88e-07	1e-05	SCML2	XP_038028856.1 sex comb on midleg-like protein 2 isoform X1 [Anas platyrhynchos]
MSTRG.10413	0.643	7.482	3.54053	7.9e-07	1.01e-05	--	-
ENSAPLG00020010048	0.310667	2.953	3.24874	7.91e-07	1.01e-05	SAMD11	XP_027299161.2 sterile alpha motif domain-containing protein 11 isoform X1 [Anas platyrhynchos]
ENSAPLG00020008701	346.961	128.697	-1.43079	7.97e-07	1.01e-05	TMEM63A	XP_027309493.2 CSC1-like protein 1 [Anas platyrhynchos]
ENSAPLG00020013017	9.51167	31.4633	1.7259	8.12e-07	1.03e-05	ZBTB46	XP_021133503.1 zinc finger and BTB domain-containing protein 46 isoform X4 [Anas platyrhynchos]
ENSAPLG00020011828	72.9923	26.6553	-1.45332	8.12e-07	1.03e-05	ZER1	XP_013054138.1 PREDICTED: protein zer-1 homolog [Anser cygnoides domesticus]
ENSAPLG00020010509	47.6667	19.6333	-1.27968	8.33e-07	1.06e-05	Abtb1	XP_027323315.1 ankyrin repeat and BTB/POZ domain-containing protein 1 [Anas platyrhynchos]
ENSAPLG00020006675	101.273	36.5963	-1.46848	8.36e-07	1.06e-05	RFNG	XP_027327387.1 beta-1,3-N-acetylglucosaminyltransferase radical fringe [Anas platyrhynchos]
ENSAPLG00020017678	14.7173	42.0823	1.5157	8.37e-07	1.06e-05	Slc25a22	XP_032045046.1 mitochondrial glutamate carrier 1 [Aythya fuligula]
MSTRG.1976	28.9997	9.577	-1.59839	8.38e-07	1.06e-05	DOP1B	XP_027304929.2 taxid=8839 protein dopey-2 isoform X1 [Anas platyrhynchos]
ENSAPLG00020000358	2.78767	16.2733	2.54538	8.44e-07	1.07e-05	TRB	AAC21563.1 TCR beta chain, partial [Anas platyrhynchos]
ENSAPLG00020002995	1.78367	16.4477	3.20496	8.45e-07	1.07e-05	--	XP_038028608.1 guanylate-binding protein 2-like [Anas platyrhynchos]
MSTRG.6448	1.48467	5.72367	1.9468	8.57e-07	1.08e-05	--	KAK4816271.1 taxid=33587 hypothetical protein QYF61_014343 [Mycteria americana]
ENSAPLG00020012324	0.604	4.77167	2.98187	8.62e-07	1.09e-05	ST3GAL5	XP_027311531.1 lactosylceramide alpha-2,3-sialyltransferase isoform X4 [Anas platyrhynchos]
ENSAPLG00020014575	8.15633	23.059	1.49934	8.95e-07	1.13e-05	MADD	XP_027314607.1 MAP kinase-activating death domain protein isoform X4 [Anas platyrhynchos]
ENSAPLG00020009983	148.642	330.299	1.15193	9.01e-07	1.13e-05	RASGEF1B	XP_040411071.1 ras-GEF domain-containing family member 1B [Cygnus olor]
ENSAPLG00020008341	0.0976667	4.36133	5.48076	9.05e-07	1.14e-05	FSTL3	XP_032059618.1 follistatin-related protein 3 [Aythya fuligula]
ENSAPLG00020010812	0.462333	5.75367	3.63748	9.24e-07	1.16e-05	ERVK-11	XP_013026164.1 PREDICTED: endogenous retrovirus group K member 18 Pol protein-like, partial [Anser cygnoides domesticus]
ENSAPLG00020010359	0.001	1.836	10.8424	9.24e-07	1.16e-05	CD163	XP_038028666.1 LOW QUALITY PROTEIN: scavenger receptor cysteine-rich type 1 protein M130-like [Anas platyrhynchos]
ENSAPLG00020007409	2613.45	977.762	-1.4184	9.26e-07	1.16e-05	SCPEP1	XP_027327417.2 retinoid-inducible serine carboxypeptidase isoform X1 [Anas platyrhynchos]
ENSAPLG00020004313	1.245	72.3607	5.86099	9.47e-07	1.19e-05	ALDH3B1	XP_027314802.2 aldehyde dehydrogenase family 3 member B1-like [Anas platyrhynchos]
ENSAPLG00020000862	39.1953	92.145	1.23322	9.52e-07	1.19e-05	RUBCNL	XP_005024861.3 protein associated with UVRAG as autophagy enhancer isoform X2 [Anas platyrhynchos]
ENSAPLG00020014867	125.664	310.107	1.3032	9.59e-07	1.2e-05	DDA1	XP_010223998.1 PREDICTED: DET1- and DDB1-associated protein 1 [Tinamus guttatus]
ENSAPLG00020017857	23.1077	6.47633	-1.83512	9.66e-07	1.21e-05	AGAP1	XP_038038473.1 arf-GAP with GTPase, ANK repeat and PH domain-containing protein 1 isoform X8 [Anas platyrhynchos]
ENSAPLG00020007318	30.6563	88.926	1.53642	9.69e-07	1.21e-05	IL1RN	XP_032060067.1 interleukin-1 receptor antagonist protein-like [Aythya fuligula]
MSTRG.19719	0.001	4.734	12.2088	9.93e-07	1.24e-05	--	-
ENSAPLG00020006873	35.534	11.955	-1.57159	9.96e-07	1.24e-05	WFS1	XP_032042131.1 wolframin [Aythya fuligula]
ENSAPLG00020008175	0.001	25.582	14.6428	1.01e-06	1.26e-05	LYVE1	XP_038036070.1 lymphatic vessel endothelial hyaluronic acid receptor 1 [Anas platyrhynchos]
ENSAPLG00020007624	7.03333	1.31267	-2.42171	1.05e-06	1.3e-05	Mlxipl	XP_040388603.1 carbohydrate-responsive element-binding protein isoform X6 [Cygnus olor]
ENSAPLG00020005510	134.98	49.441	-1.44897	1.05e-06	1.3e-05	RPIA	XP_038034056.1 ribose-5-phosphate isomerase [Anas platyrhynchos]
ENSAPLG00020003010	31.8787	12.4313	-1.35861	1.05e-06	1.31e-05	ARHGAP20	XP_038040565.1 rho GTPase-activating protein 20-like isoform X1 [Anas platyrhynchos]
ENSAPLG00020018404	65.1953	26.1113	-1.32009	1.06e-06	1.32e-05	uap1l1	XP_027326956.1 UDP-N-acetylhexosamine pyrophosphorylase-like protein 1 isoform X2 [Anas platyrhynchos]
ENSAPLG00020001330	2.66867	57.1357	4.4202	1.07e-06	1.32e-05	IGF2BP3	XP_002192437.2 insulin-like growth factor 2 mRNA-binding protein 3 [Taeniopygia guttata]
ENSAPLG00020014932	9.24833	32.2553	1.80227	1.11e-06	1.37e-05	tcf3	XP_038024970.1 transcription factor E2-alpha isoform X10 [Anas platyrhynchos]
ENSAPLG00020017546	928.467	437.88	-1.08431	1.11e-06	1.37e-05	Hadh	XP_027312425.2 hydroxyacyl-coenzyme A dehydrogenase, mitochondrial [Anas platyrhynchos]
ENSAPLG00020016500	78.4937	20.4	-1.94401	1.11e-06	1.37e-05	REPS2	XP_038028865.1 ralBP1-associated Eps domain-containing protein 2 isoform X1 [Anas platyrhynchos]
ENSAPLG00020000276	21.9473	49.578	1.17565	1.13e-06	1.39e-05	ZHX2	XP_038030002.1 zinc fingers and homeoboxes protein 2 [Anas platyrhynchos]
ENSAPLG00020012541	17.6193	47.6043	1.43393	1.13e-06	1.4e-05	SESN2	XP_040391082.1 sestrin-2 isoform X4 [Cygnus olor]
ENSAPLG00020018225	0.601	2.88667	2.26397	1.14e-06	1.4e-05	PLCL2	XP_032058863.1 inactive phospholipase C-like protein 2 [Aythya fuligula]
ENSAPLG00020008822	49.5577	11.559	-2.10009	1.17e-06	1.44e-05	MARVELD3	XP_038041578.1 MARVEL domain-containing protein 3 [Anas platyrhynchos]
ENSAPLG00020005023	1.70433	7.82633	2.19913	1.18e-06	1.45e-05	PAPSS2	XP_032046870.1 bifunctional 3'-phosphoadenosine 5'-phosphosulfate synthase 2 isoform X1 [Aythya fuligula]
ENSAPLG00020013884	0.735333	8.88	3.59409	1.19e-06	1.46e-05	CALD1	XP_012952593.1 caldesmon isoform X5 [Anas platyrhynchos]
MSTRG.9757	6.19533	28.379	2.19557	1.19e-06	1.47e-05	Nbeal2	XP_040404182.1 taxid=8869 neurobeachin-like protein 2 isoform X1 [Cygnus olor]
ENSAPLG00020006224	122.045	48.2347	-1.33927	1.19e-06	1.47e-05	Cux1	XP_038021848.1 homeobox protein cut-like 1 isoform X1 [Anas platyrhynchos]
MSTRG.6834	0.812333	3.22033	1.98707	1.21e-06	1.48e-05	--	XP_049662776.1 taxid=8957 activator of apoptosis harakiri [Accipiter gentilis]
MSTRG.13856	0.0663333	7.27233	6.77654	1.22e-06	1.5e-05	--	-
ENSAPLG00020004614	25.4867	5.933	-2.10291	1.24e-06	1.52e-05	ERVK-11	XP_013026164.1 PREDICTED: endogenous retrovirus group K member 18 Pol protein-like, partial [Anser cygnoides domesticus]
ENSAPLG00020014645	85.8557	27.3767	-1.64897	1.26e-06	1.55e-05	GGCT	XP_027306931.1 gamma-glutamylcyclotransferase [Anas platyrhynchos]
ENSAPLG00020001235	1.04067	8.052	2.95184	1.28e-06	1.56e-05	GCHFR	XP_032043616.1 GTP cyclohydrolase 1 feedback regulatory protein [Aythya fuligula]
ENSAPLG00020011677	0.110667	3.02933	4.77471	1.28e-06	1.56e-05	ADAM19	XP_038042225.1 disintegrin and metalloproteinase domain-containing protein 19 [Anas platyrhynchos]
ENSAPLG00020016301	438.921	163.792	-1.4221	1.29e-06	1.58e-05	PLXNC1	XP_027307823.1 plexin-C1 [Anas platyrhynchos]
ENSAPLG00020013464	100.255	37.975	-1.40056	1.3e-06	1.58e-05	WDFY4	XP_012957577.1 WD repeat- and FYVE domain-containing protein 4 isoform X2 [Anas platyrhynchos]
ENSAPLG00020018302	0.0423333	1.75367	5.37244	1.3e-06	1.58e-05	COL6A2	EOA97575.1 Collagen alpha-2(VI) chain, partial [Anas platyrhynchos]
ENSAPLG00020017923	25.7263	57.0043	1.14783	1.3e-06	1.58e-05	UPF3B	XP_027321244.2 regulator of nonsense transcripts 3B [Anas platyrhynchos]
ENSAPLG00020013159	20.0703	42.7527	1.09095	1.31e-06	1.6e-05	CLASP1	XP_040417404.1 CLIP-associating protein 1 isoform X9 [Cygnus olor]
MSTRG.1172	0.314333	3.94767	3.65063	1.32e-06	1.61e-05	--	-
ENSAPLG00020004339	21.2523	5.198	-2.03159	1.33e-06	1.62e-05	CEP152	XP_038041025.1 centrosomal protein of 152 kDa isoform X1 [Anas platyrhynchos]
MSTRG.8193	0.145667	3.49967	4.58647	1.36e-06	1.66e-05	--	KAK4812888.1 taxid=33587 LOW QUALITY PROTEIN: hypothetical protein QYF61_024244 [Mycteria americana]
ENSAPLG00020004195	7.843	20.573	1.39127	1.38e-06	1.67e-05	NDNF	XP_040411962.1 protein NDNF isoform X2 [Cygnus olor]
ENSAPLG00020006431	61.4523	24.46	-1.32904	1.38e-06	1.67e-05	SLC20A2	XP_005025175.1 sodium-dependent phosphate transporter 2 isoform X1 [Anas platyrhynchos]
ENSAPLG00020010483	0.0396667	2.708	6.09316	1.39e-06	1.68e-05	CD163L1	XP_038028667.1 scavenger receptor cysteine-rich type 1 protein M130-like [Anas platyrhynchos]
ENSAPLG00020000999	6.35267	1.71533	-1.88887	1.39e-06	1.68e-05	mapkbp1	XP_027314897.1 mitogen-activated protein kinase-binding protein 1 isoform X3 [Anas platyrhynchos]
ENSAPLG00020011193	0.197333	2.112	3.4199	1.43e-06	1.73e-05	Ciita	AWB97041.1 class II major histocompatibility complex transactivator [Anas platyrhynchos]
ENSAPLG00020012303	52.4737	141.165	1.42771	1.44e-06	1.74e-05	GBP1	XP_038041838.1 guanylate-binding protein 1-like [Anas platyrhynchos]
MSTRG.225	3.22633	12.8923	1.99855	1.47e-06	1.77e-05	--	-
ENSAPLG00020002706	15.2363	48.4657	1.66945	1.48e-06	1.78e-05	MGST2	XP_005022467.1 microsomal glutathione S-transferase 2 [Anas platyrhynchos]
ENSAPLG00020002377	15.6587	40.6573	1.37655	1.5e-06	1.81e-05	RESF1	XP_012964731.1 retroelement silencing factor 1 isoform X1 [Anas platyrhynchos]
MSTRG.5390	2.444	11.2917	2.20794	1.52e-06	1.83e-05	--	XP_047913272.1 taxid=8845 alpha-1,3-mannosyl-glycoprotein 4-beta-N-acetylglucosaminyltransferase B [Anser cygnoides]
ENSAPLG00020009472	137.411	56.6113	-1.27933	1.53e-06	1.85e-05	TMED7	XP_038026368.1 transmembrane emp24 domain-containing protein 7 [Anas platyrhynchos]
ENSAPLG00020012234	28.5843	10.0977	-1.5012	1.55e-06	1.86e-05	ABCC4	XP_027299028.1 multidrug resistance-associated protein 4 isoform X1 [Anas platyrhynchos]
ENSAPLG00020018229	82.7973	28.5647	-1.53535	1.55e-06	1.87e-05	PIK3C3	XP_038026591.1 phosphatidylinositol 3-kinase catalytic subunit type 3 isoform X1 [Anas platyrhynchos]
ENSAPLG00020001988	32.1053	12.8097	-1.32558	1.57e-06	1.89e-05	CRYZ	XP_032048611.1 quinone oxidoreductase [Aythya fuligula]
ENSAPLG00020014407	0.171667	20.4047	6.89315	1.59e-06	1.91e-05	ITGB3	XP_038024757.1 LOW QUALITY PROTEIN: integrin beta-3 [Anas platyrhynchos]
ENSAPLG00020013554	13.2847	4.38467	-1.59922	1.61e-06	1.94e-05	ABCG2	XP_027315892.2 broad substrate specificity ATP-binding cassette transporter ABCG2 [Anas platyrhynchos]
ENSAPLG00020010450	1.641	12.347	2.91151	1.63e-06	1.96e-05	Azin2	XP_038023338.1 LOW QUALITY PROTEIN: antizyme inhibitor 2 [Anas platyrhynchos]
ENSAPLG00020015040	11.9713	29.348	1.29368	1.68e-06	2.01e-05	APAF1	XP_027308212.2 apoptotic protease-activating factor 1 isoform X1 [Anas platyrhynchos]
MSTRG.1975	105.281	37.371	-1.49426	1.7e-06	2.03e-05	DOP1B	XP_027304932.2 taxid=8839 protein dopey-2 isoform X2 [Anas platyrhynchos]
ENSAPLG00020011148	5.08933	1.22967	-2.04921	1.7e-06	2.03e-05	KIAA1107	XP_038038696.1 BTB/POZ domain-containing protein 8 isoform X4 [Anas platyrhynchos]
ENSAPLG00020004294	94.5047	38.6613	-1.28949	1.7e-06	2.03e-05	RAPGEF1	XP_038044049.1 rap guanine nucleotide exchange factor 1 isoform X6 [Anas platyrhynchos]
MSTRG.19327	0.001	3.13667	11.615	1.71e-06	2.04e-05	--	XP_027319432.2 taxid=8839 1-phosphatidylinositol phosphodiesterase-like [Anas platyrhynchos]
ENSAPLG00020010452	0.230333	2.77867	3.5926	1.72e-06	2.05e-05	SLC13A3	XP_027328988.1 solute carrier family 13 member 3 [Anas platyrhynchos]
ENSAPLG00020004653	0.654	5.50333	3.07294	1.72e-06	2.05e-05	FLT1	XP_032048317.1 vascular endothelial growth factor receptor 1 isoform X1 [Aythya fuligula]
ENSAPLG00020008608	5.11467	16.0337	1.64839	1.73e-06	2.06e-05	TRAF3IP2	XP_027548769.1 adapter protein CIKS isoform X1 [Neopelma chrysocephalum]
ENSAPLG00020009277	26.1047	83.7393	1.6816	1.74e-06	2.07e-05	SLC7A3	XP_027320942.2 cationic amino acid transporter 3 [Anas platyrhynchos]
ENSAPLG00020001042	30.1303	11.1947	-1.42841	1.75e-06	2.08e-05	IVD	XP_038036019.1 isovaleryl-CoA dehydrogenase, mitochondrial [Anas platyrhynchos]
ENSAPLG00020009137	28.9803	72.363	1.32018	1.78e-06	2.11e-05	ARL14EP	XP_012957414.2 ARL14 effector protein isoform X1 [Anas platyrhynchos]
ENSAPLG00020016758	0.027	3.17467	6.8775	1.8e-06	2.14e-05	KCNMB2	XP_021131449.2 calcium-activated potassium channel subunit beta-2 isoform X1 [Anas platyrhynchos]
MSTRG.278	67.9143	26.9927	-1.33115	1.82e-06	2.15e-05	LRRK2	XP_038041899.1 taxid=8839 leucine-rich repeat serine/threonine-protein kinase 2 isoform X2 [Anas platyrhynchos]
ENSAPLG00020012008	181.251	408.26	1.1715	1.83e-06	2.17e-05	TMEM14C	EOB02146.1 Transmembrane protein 14C, partial [Anas platyrhynchos]
ENSAPLG00020012055	29.7893	74.002	1.31277	1.84e-06	2.18e-05	PELI1	XP_013050348.1 PREDICTED: E3 ubiquitin-protein ligase pellino homolog 1 isoform X1 [Anser cygnoides domesticus]
ENSAPLG00020014859	39.173	105.779	1.43312	1.86e-06	2.21e-05	JUND	XP_032059498.1 transcription factor jun-D [Aythya fuligula]
ENSAPLG00020009682	0.261333	2.385	3.19003	1.87e-06	2.21e-05	NGFR	XP_030364852.1 tumor necrosis factor receptor superfamily member 16 isoform X1 [Strigops habroptila]
ENSAPLG00020007378	51.2207	120.146	1.22999	1.89e-06	2.23e-05	TRIM25	XP_012948210.3 E3 ubiquitin/ISG15 ligase TRIM25 isoform X3 [Anas platyrhynchos]
ENSAPLG00020012414	44.3167	114.953	1.37513	1.91e-06	2.25e-05	CHST11	XP_021131710.2 carbohydrate sulfotransferase 13 [Anas platyrhynchos]
ENSAPLG00020001151	2.9	10.1613	1.80896	1.95e-06	2.3e-05	cry-dash	XP_032039229.1 cryptochrome DASH-like [Aythya fuligula]
MSTRG.6467	0.027	3.01167	6.80146	1.96e-06	2.31e-05	Pxdn	XP_027328729.2 taxid=8839 peroxidasin homolog isoform X1 [Anas platyrhynchos]
ENSAPLG00020009868	11.948	1.89867	-2.65371	1.96e-06	2.31e-05	She	XP_032060424.1 SH2 domain-containing adapter protein E [Aythya fuligula]
ENSAPLG00020006034	5.069	23.8227	2.23256	1.98e-06	2.33e-05	CD28	XP_012952396.1 T-cell-specific surface glycoprotein CD28 homolog [Anas platyrhynchos]
ENSAPLG00020015228	38.629	87.4907	1.17944	1.99e-06	2.34e-05	TUT4	EOA95918.1 Zinc finger CCHC domain-containing protein 11, partial [Anas platyrhynchos]
ENSAPLG00020017683	6.29833	0.57	-3.46594	1.99e-06	2.34e-05	cracr2b	XP_038036667.1 EF-hand calcium-binding domain-containing protein 4A isoform X5 [Anas platyrhynchos]
ENSAPLG00020012886	1.812	0.001	-10.8234	2e-06	2.34e-05	CFH	XP_027318643.2 complement factor H isoform X2 [Anas platyrhynchos]
ENSAPLG00020015182	0.001	2.24533	11.1327	2.01e-06	2.36e-05	TUBA1D	XP_032063629.1 tubulin alpha-3 chain [Aythya fuligula]
ENSAPLG00020012073	0.0333333	3.53467	6.72846	2.02e-06	2.37e-05	TYMP	XP_038043965.1 thymidine phosphorylase [Anas platyrhynchos]
ENSAPLG00020005860	130.836	51.5403	-1.34398	2.03e-06	2.37e-05	CACUL1	XP_027315999.1 CDK2-associated and cullin domain-containing protein 1 [Anas platyrhynchos]
ENSAPLG00020016947	4.99767	23.1427	2.21123	2.03e-06	2.37e-05	IFT46	XP_038023558.1 intraflagellar transport protein 46 homolog isoform X1 [Anas platyrhynchos]
ENSAPLG00020004768	35.1227	12.6227	-1.47639	2.06e-06	2.41e-05	NUDT9	EOB06359.1 ADP-ribose pyrophosphatase, mitochondrial, partial [Anas platyrhynchos]
ENSAPLG00020009573	19783.2	8572.34	-1.20651	2.06e-06	2.41e-05	CTSL	XP_032062008.1 cathepsin L1 [Aythya fuligula]
ENSAPLG00020001255	96.187	40.682	-1.24145	2.08e-06	2.42e-05	rnaseh2b	XP_027327042.1 ribonuclease H2 subunit B isoform X1 [Anas platyrhynchos]
ENSAPLG00020010484	46.9747	111.399	1.24579	2.08e-06	2.43e-05	OSER1	EOB03624.1 Uncharacterized protein C20orf111, partial [Anas platyrhynchos]
ENSAPLG00020012980	64.1693	28.1457	-1.18897	2.14e-06	2.49e-05	UTRN	XP_038031762.1 utrophin isoform X2 [Anas platyrhynchos]
MSTRG.402	809.208	359.506	-1.17049	2.14e-06	2.49e-05	Smim30	XP_027313249.1 taxid=8839 small integral membrane protein 30 [Anas platyrhynchos]
ENSAPLG00020000463	2.44967	0.0226667	-6.75587	2.14e-06	2.49e-05	SLC39A12	XP_021123583.1 zinc transporter ZIP12 isoform X3 [Anas platyrhynchos]
ENSAPLG00020008200	0.670667	3.54267	2.40117	2.14e-06	2.49e-05	ARMC2	XP_012952032.3 armadillo repeat-containing protein 2 isoform X3 [Anas platyrhynchos]
ENSAPLG00020012473	15.017	47.838	1.67156	2.18e-06	2.53e-05	Borcs6	XP_038032581.1 LOW QUALITY PROTEIN: BLOC-1-related complex subunit 6 [Anas platyrhynchos]
ENSAPLG00020005569	5.96033	1.06167	-2.48906	2.19e-06	2.55e-05	Ttc8	XP_027314302.1 tetratricopeptide repeat protein 8 isoform X1 [Anas platyrhynchos]
ENSAPLG00020014499	0.150333	3.92267	4.7056	2.19e-06	2.55e-05	C18orf25	XP_038025391.1 uncharacterized protein C18orf25-like isoform X1 [Anas platyrhynchos]
MSTRG.590	15.4827	33.705	1.12231	2.2e-06	2.55e-05	TOB2	XP_027309848.2 taxid=8839 protein Tob2 [Anas platyrhynchos]
ENSAPLG00020016656	16.4937	44.379	1.42797	2.21e-06	2.56e-05	SMAD3	NP_989806.1 mothers against decapentaplegic homolog 3 [Gallus gallus]
ENSAPLG00020010212	41.6057	86.9387	1.06322	2.21e-06	2.56e-05	TRAF2	XP_027326847.1 TNF receptor-associated factor 2 isoform X1 [Anas platyrhynchos]
MSTRG.9915	0.001	7.45033	12.8631	2.22e-06	2.57e-05	--	-
ENSAPLG00020013018	156.718	60.9557	-1.36234	2.23e-06	2.58e-05	Ifngr1	XP_027310261.1 LOW QUALITY PROTEIN: interferon gamma receptor 1 [Anas platyrhynchos]
ENSAPLG00020009915	68.065	30.7587	-1.14592	2.23e-06	2.58e-05	ELP1	XP_038026882.1 elongator complex protein 1 isoform X1 [Anas platyrhynchos]
ENSAPLG00020017382	14.515	2.517	-2.52777	2.25e-06	2.59e-05	Neu4	XP_032049211.1 sialidase-4 [Aythya fuligula]
ENSAPLG00020018347	18.386	46.5667	1.34069	2.25e-06	2.59e-05	C7orf26	XP_032053588.1 uncharacterized protein C7orf26 homolog [Aythya fuligula]
ENSAPLG00020008157	225.62	91.01	-1.3098	2.26e-06	2.6e-05	AP3B1	XP_032062025.1 AP-3 complex subunit beta-1 isoform X5 [Aythya fuligula]
ENSAPLG00020017339	0.417667	4.05767	3.28023	2.29e-06	2.63e-05	FRMD6	XP_040415110.1 FERM domain-containing protein 6-like isoform X2 [Cygnus olor]
ENSAPLG00020015509	13.8013	2	-2.78674	2.31e-06	2.66e-05	RWDD3	XP_027318888.2 RWD domain-containing protein 3 [Anas platyrhynchos]
ENSAPLG00020017558	0.0763333	1.75167	4.52027	2.31e-06	2.66e-05	ARHGEF38	XP_005027952.4 rho guanine nucleotide exchange factor 38 [Anas platyrhynchos]
MSTRG.2133	0.001	3.05133	11.5752	2.32e-06	2.67e-05	--	-
ENSAPLG00020015777	74.867	176.117	1.23413	2.41e-06	2.76e-05	rbpj	XP_027313095.1 recombining binding protein suppressor of hairless isoform X1 [Anas platyrhynchos]
ENSAPLG00020003340	76.999	31.132	-1.30644	2.41e-06	2.76e-05	MVB12B	XP_038043986.1 multivesicular body subunit 12B isoform X2 [Anas platyrhynchos]
ENSAPLG00020005230	78.4893	186.672	1.24994	2.46e-06	2.82e-05	Uba2	XP_027322753.1 SUMO-activating enzyme subunit 2 [Anas platyrhynchos]
ENSAPLG00020005127	35.5247	10.907	-1.70357	2.46e-06	2.82e-05	E2F8	XP_027314732.1 transcription factor E2F8 [Anas platyrhynchos]
ENSAPLG00020003894	120.025	47.8357	-1.32718	2.49e-06	2.85e-05	NDUFAF2	XP_032061670.1 NADH dehydrogenase [ubiquinone] 1 alpha subcomplex assembly factor 2 [Aythya fuligula]
ENSAPLG00020013550	73.8637	23.4113	-1.65766	2.49e-06	2.85e-05	Bloc1s2	XP_031457938.1 biogenesis of lysosome-related organelles complex 1 subunit 2 isoform X1 [Phasianus colchicus]
ENSAPLG00020000108	174.031	395.412	1.18401	2.5e-06	2.86e-05	--	XP_005016046.3 cytokine receptor common subunit beta [Anas platyrhynchos]
ENSAPLG00020014142	8.30133	23.9953	1.53134	2.55e-06	2.91e-05	Cdc25b	XP_040412175.1 M-phase inducer phosphatase 2 isoform X2 [Cygnus olor]
ENSAPLG00020001956	2.68433	10.8753	2.01842	2.55e-06	2.91e-05	ODF3	XP_038036402.1 outer dense fiber protein 3-like [Anas platyrhynchos]
ENSAPLG00020001305	41.0657	103.31	1.33098	2.57e-06	2.93e-05	Sdc1	XP_027311103.1 syndecan-1 [Anas platyrhynchos]
ENSAPLG00020018421	58.1603	147.608	1.34367	2.59e-06	2.95e-05	Shisa5	XP_038041739.1 protein shisa-5 isoform X3 [Anas platyrhynchos]
ENSAPLG00020012900	0.05	1.97867	5.30646	2.59e-06	2.95e-05	foxa2-a	XP_027308979.1 hepatocyte nuclear factor 3-beta isoform X1 [Anas platyrhynchos]
ENSAPLG00020007404	3.319	11.7457	1.82331	2.6e-06	2.96e-05	Gimap1	XP_038030407.1 GTPase IMAP family member 1-like isoform X1 [Anas platyrhynchos]
ENSAPLG00020011564	4.538	24.5247	2.43411	2.63e-06	2.98e-05	PRRG1	XP_032053737.1 transmembrane gamma-carboxyglutamic acid protein 1, partial [Aythya fuligula]
MSTRG.20581	0.001	3.22767	11.6563	2.65e-06	3e-05	ZAN	XP_038028059.1 taxid=8839 IgGFc-binding protein-like [Anas platyrhynchos]
ENSAPLG00020008352	26.7703	7.75567	-1.78731	2.65e-06	3.01e-05	TNFAIP8L1	XP_035204094.1 tumor necrosis factor alpha-induced protein 8-like protein 1 isoform X2 [Oxyura jamaicensis]
ENSAPLG00020005368	0.001	2.33967	11.1921	2.72e-06	3.08e-05	HOXD10	XP_005013606.1 homeobox protein Hox-D10 [Anas platyrhynchos]
ENSAPLG00020014793	24.1857	56.9203	1.23479	2.74e-06	3.11e-05	CMTM6	XP_027306905.2 CKLF-like MARVEL transmembrane domain-containing protein 6 [Anas platyrhynchos]
MSTRG.9200	4.15367	0.773667	-2.4246	2.76e-06	3.13e-05	--	-
ENSAPLG00020002383	16.1223	4.301	-1.90632	2.77e-06	3.13e-05	NKD1	XP_035399096.1 protein naked cuticle homolog 1 isoform X1 [Cygnus atratus]
MSTRG.1251	12.415	2.6	-2.2555	2.79e-06	3.15e-05	--	KAK4827831.1 taxid=33587 hypothetical protein QYF61_021915 [Mycteria americana]
ENSAPLG00020000262	11.6313	29.402	1.3379	2.8e-06	3.16e-05	SMYD5	XP_005024034.3 SET and MYND domain-containing protein 5 [Anas platyrhynchos]
ENSAPLG00020004837	102.754	42.2513	-1.28213	2.8e-06	3.16e-05	PCYT2	XP_027327043.2 ethanolamine-phosphate cytidylyltransferase isoform X1 [Anas platyrhynchos]
ENSAPLG00020010416	1.33967	8.31567	2.63396	2.83e-06	3.19e-05	ABCG4	XP_027299952.1 LOW QUALITY PROTEIN: ATP-binding cassette sub-family G member 4 [Anas platyrhynchos]
ENSAPLG00020009293	37.151	105.47	1.50536	2.87e-06	3.23e-05	CREM	XP_027306291.1 cAMP-responsive element modulator isoform X4 [Anas platyrhynchos]
MSTRG.9157	5.95667	15.1487	1.34661	2.91e-06	3.27e-05	FYCO1	NXT33224.1 taxid=37079 FYCO1 protein [Pelecanoides urinatrix]
ENSAPLG00020016178	9.47733	1.538	-2.62343	2.93e-06	3.29e-05	castor2	XP_021271251.1 cytosolic arginine sensor for mTORC1 subunit 2 isoform X1 [Numida meleagris]
ENSAPLG00020002448	2.54767	13.8507	2.44271	2.94e-06	3.31e-05	--	XP_038024844.1 M1-specific T cell receptor alpha chain isoform X3 [Anas platyrhynchos]
ENSAPLG00020014936	42.7633	17.0153	-1.32954	3e-06	3.37e-05	FECH	XP_027302974.1 LOW QUALITY PROTEIN: ferrochelatase, mitochondrial [Anas platyrhynchos]
ENSAPLG00020003242	4.238	15.854	1.90339	3.01e-06	3.38e-05	Fam107b	KAF1418096.1 hypothetical protein FQV22_0005146, partial [Spheniscus magellanicus]
ENSAPLG00020018200	106.611	262.241	1.29854	3.02e-06	3.39e-05	PARP12	XP_027304927.2 protein mono-ADP-ribosyltransferase PARP12 [Anas platyrhynchos]
ENSAPLG00020009374	366.691	142.714	-1.36144	3.02e-06	3.39e-05	ERP29	XP_032055035.1 endoplasmic reticulum resident protein 29 [Aythya fuligula]
ENSAPLG00020009336	24.414	81.6647	1.742	3.1e-06	3.47e-05	MYCT1	XP_005024846.1 myc target protein 1 [Anas platyrhynchos]
ENSAPLG00020002793	221.478	480.61	1.11771	3.12e-06	3.49e-05	NAMPT	XP_009985471.1 PREDICTED: nicotinamide phosphoribosyltransferase, partial [Tauraco erythrolophus]
ENSAPLG00020001465	0.001	3.54067	11.7898	3.13e-06	3.5e-05	Gpr152	XP_038035979.1 probable G-protein coupled receptor 152 [Anas platyrhynchos]
ENSAPLG00020014595	0.001	0.955667	9.90036	3.16e-06	3.53e-05	RICTOR	XP_038025347.1 rapamycin-insensitive companion of mTOR-like isoform X1 [Anas platyrhynchos]
ENSAPLG00020002707	21.7	6.57933	-1.72168	3.17e-06	3.54e-05	Hspb2	XP_005030929.1 heat shock protein beta-2 [Anas platyrhynchos]
ENSAPLG00020009973	13.9777	3.36067	-2.0563	3.17e-06	3.54e-05	PPM1H	XP_038029193.1 LOW QUALITY PROTEIN: protein phosphatase 1H [Anas platyrhynchos]
ENSAPLG00020009630	33.847	94.2377	1.47728	3.25e-06	3.63e-05	SH3BGRL2	XP_027310758.2 SH3 domain-binding glutamic acid-rich-like protein 2 [Anas platyrhynchos]
ENSAPLG00020003754	83.0167	183.553	1.14472	3.34e-06	3.72e-05	RNF121	XP_032055113.1 RING finger protein 121 [Aythya fuligula]
ENSAPLG00020016858	16.3733	5.13367	-1.67329	3.41e-06	3.79e-05	ALDH5A1	XP_038030028.1 succinate-semialdehyde dehydrogenase, mitochondrial [Anas platyrhynchos]
ENSAPLG00020017647	0.0256667	2.59767	6.66118	3.41e-06	3.79e-05	KLHL3	XP_032052923.1 kelch-like protein 3 isoform X2 [Aythya fuligula]
MSTRG.15796	56.247	21.804	-1.36718	3.41e-06	3.8e-05	--	XP_038034059.1 taxid=8839 uncharacterized protein LOC101793952 isoform X2 [Anas platyrhynchos]
MSTRG.4963	0.521667	3.07367	2.55876	3.42e-06	3.8e-05	CMTR2	XP_027321826.1 taxid=8839 cap-specific mRNA (nucleoside-2'-O-)-methyltransferase 2 [Anas platyrhynchos]
ENSAPLG00020013066	93.2693	35.3997	-1.39767	3.42e-06	3.8e-05	NOMO2	XP_027324648.1 nodal modulator 1 [Anas platyrhynchos]
ENSAPLG00020013280	13.1603	3.37833	-1.96181	3.48e-06	3.86e-05	TRAV1-2	XP_038028231.1 uncharacterized protein LOC113841485 [Anas platyrhynchos]
ENSAPLG00020017257	10.1457	38.4753	1.92307	3.51e-06	3.89e-05	Ier5	XP_027319037.2 immediate early response gene 5 protein [Anas platyrhynchos]
MSTRG.1255	0.374333	20.4517	5.77175	3.52e-06	3.9e-05	--	-
ENSAPLG00020013477	25.804	77.695	1.59023	3.56e-06	3.94e-05	Stx11	EOB03990.1 Syntaxin-11, partial [Anas platyrhynchos]
ENSAPLG00020017076	70.5203	28.6953	-1.29722	3.56e-06	3.94e-05	DPAGT1	XP_027300142.2 UDP-N-acetylglucosamine--dolichyl-phosphate N-acetylglucosaminephosphotransferase [Anas platyrhynchos]
MSTRG.9504	3.335	0.0473333	-6.13869	3.57e-06	3.94e-05	--	-
MSTRG.4364	14.4773	56.8713	1.97391	3.57e-06	3.95e-05	--	XP_012960389.3 taxid=8839 uncharacterized protein LOC101792197 [Anas platyrhynchos]
MSTRG.7188	0.0786667	4.84567	5.9448	3.59e-06	3.96e-05	--	-
ENSAPLG00020006523	216.817	98.2143	-1.14247	3.63e-06	4e-05	Spg7	XP_027322211.2 LOW QUALITY PROTEIN: paraplegin [Anas platyrhynchos]
MSTRG.9241	6.97467	0.939667	-2.8919	3.67e-06	4.04e-05	--	-
ENSAPLG00020001037	141.464	59.4657	-1.2503	3.71e-06	4.08e-05	SUCLA2	XP_027327480.1 succinate--CoA ligase [ADP-forming] subunit beta, mitochondrial [Anas platyrhynchos]
ENSAPLG00020008521	608.12	282.131	-1.10799	3.71e-06	4.08e-05	GRB2	NP_001385050.1 growth factor receptor-bound protein 2 isoform 1 [Gallus gallus]
ENSAPLG00020003932	0.0653333	6.588	6.65588	3.74e-06	4.12e-05	GRTP1	XP_027300273.1 growth hormone-regulated TBC protein 1 [Anas platyrhynchos]
MSTRG.11800	0.0593333	3.57433	5.91269	3.8e-06	4.18e-05	Cd34	XP_027300584.2 taxid=8839 hematopoietic progenitor cell antigen CD34 isoform X2 [Anas platyrhynchos]
ENSAPLG00020001635	99.461	44.4967	-1.16043	3.81e-06	4.18e-05	GNAI1	NP_990734.2 guanine nucleotide-binding protein G(i) subunit alpha-1 [Gallus gallus]
ENSAPLG00020012798	192.042	85.497	-1.16748	3.82e-06	4.19e-05	IDH2	XP_038040949.1 isocitrate dehydrogenase [NADP], mitochondrial [Anas platyrhynchos]
ENSAPLG00020015337	0.536	6.16933	3.52481	3.82e-06	4.19e-05	RAB27B	XP_012947708.1 ras-related protein Rab-27B [Anas platyrhynchos]
ENSAPLG00020009589	390.968	179.508	-1.12301	3.86e-06	4.23e-05	FBP1	XP_005017297.1 fructose-1,6-bisphosphatase 1 [Anas platyrhynchos]
ENSAPLG00020011759	107.821	228.618	1.0843	3.88e-06	4.25e-05	YEATS4	XP_002190655.1 YEATS domain-containing protein 4 isoform X2 [Taeniopygia guttata]
ENSAPLG00020006149	454.419	201.228	-1.17519	3.88e-06	4.25e-05	NPC1	XP_027307740.2 NPC intracellular cholesterol transporter 1 [Anas platyrhynchos]
ENSAPLG00020005646	26.8407	95.147	1.82574	3.94e-06	4.31e-05	PISD	EOA96298.1 Phosphatidylserine decarboxylase proenzyme, partial [Anas platyrhynchos]
ENSAPLG00020004394	38.5277	15.1063	-1.35074	3.96e-06	4.33e-05	METTL14	XP_029881539.2 N6-adenosine-methyltransferase non-catalytic subunit isoform X3 [Aquila chrysaetos chrysaetos]
ENSAPLG00020016492	17.3657	44.0763	1.34377	3.97e-06	4.33e-05	RAI2	XP_027303906.1 LOW QUALITY PROTEIN: retinoic acid-induced protein 2 [Anas platyrhynchos]
ENSAPLG00020007149	177.058	79.1563	-1.16144	4.02e-06	4.38e-05	Snx9	XP_027310209.1 sorting nexin-9 isoform X1 [Anas platyrhynchos]
MSTRG.15933	0.0293333	2.00467	6.09468	4.03e-06	4.4e-05	--	EOB04297.1 taxid=8839 hypothetical protein Anapl_04707 [Anas platyrhynchos]
ENSAPLG00020002517	46.4747	10.5913	-2.13356	4.06e-06	4.43e-05	TTYH2	XP_027327302.2 protein tweety homolog 2 [Anas platyrhynchos]
ENSAPLG00020017368	75.744	29.7517	-1.34816	4.14e-06	4.51e-05	KCTD9	XP_032060012.1 BTB/POZ domain-containing protein KCTD9 isoform X2 [Aythya fuligula]
MSTRG.17349	37.534	16.701	-1.16826	4.15e-06	4.52e-05	--	-
ENSAPLG00020001816	2.88467	0.288333	-3.3226	4.16e-06	4.52e-05	POSTN	XP_038030246.1 periostin isoform X3 [Anas platyrhynchos]
ENSAPLG00020001524	25.8933	8.01133	-1.69247	4.17e-06	4.53e-05	CTH	XP_027318986.2 cystathionine gamma-lyase [Anas platyrhynchos]
ENSAPLG00020005314	5621.41	2528.25	-1.15279	4.18e-06	4.54e-05	CTSZ	XP_027328846.1 cathepsin Z [Anas platyrhynchos]
ENSAPLG00020001811	67.254	150.769	1.16465	4.19e-06	4.55e-05	--	XP_038021894.1 interferon alpha/beta receptor 2 isoform X2 [Anas platyrhynchos]
ENSAPLG00020000238	19.267	5.801	-1.73176	4.25e-06	4.6e-05	GUF1	XP_027312955.1 translation factor GUF1, mitochondrial isoform X1 [Anas platyrhynchos]
ENSAPLG00020001556	57.1	21.944	-1.37966	4.26e-06	4.62e-05	CAPN3	XP_005021736.2 calpain-3 isoform X1 [Anas platyrhynchos]
MSTRG.10989	0.0453333	4.16867	6.52287	4.27e-06	4.62e-05	--	-
ENSAPLG00020008191	38.6623	81.8217	1.08155	4.28e-06	4.62e-05	Rspry1	XP_032051554.1 RING finger and SPRY domain-containing protein 1 [Aythya fuligula]
ENSAPLG00020003773	106.487	47.183	-1.17434	4.3e-06	4.64e-05	CCDC90B	XP_009991148.1 PREDICTED: coiled-coil domain-containing protein 90B, mitochondrial [Tauraco erythrolophus]
ENSAPLG00020009329	145.687	330.675	1.18254	4.3e-06	4.65e-05	B3GNT2	XP_005019165.1 N-acetyllactosaminide beta-1,3-N-acetylglucosaminyltransferase 2 [Anas platyrhynchos]
ENSAPLG00020001969	2.26033	9.641	2.09265	4.38e-06	4.73e-05	DDB2	XP_038036415.1 DNA damage-binding protein 2 [Anas platyrhynchos]
ENSAPLG00020013781	0.265667	7.58167	4.83483	4.51e-06	4.86e-05	GPR55	XP_012963273.1 G-protein coupled receptor 55 [Anas platyrhynchos]
MSTRG.9069	0.001	1.99667	10.9634	4.52e-06	4.87e-05	--	-
ENSAPLG00020002398	87.948	36.9867	-1.24965	4.53e-06	4.88e-05	CBL	XP_027300206.2 E3 ubiquitin-protein ligase CBL [Anas platyrhynchos]
ENSAPLG00020018267	1.08467	5.078	2.22701	4.56e-06	4.9e-05	SLC4A3	XP_038038042.1 anion exchange protein 3 isoform X1 [Anas platyrhynchos]
ENSAPLG00020013603	9.816	28.667	1.54618	4.56e-06	4.9e-05	NR3C1	EOA99177.1 Glucocorticoid receptor, partial [Anas platyrhynchos]
ENSAPLG00020000749	42.8417	96.1613	1.16644	4.58e-06	4.92e-05	USP25	XP_027305079.1 ubiquitin carboxyl-terminal hydrolase 25 isoform X1 [Anas platyrhynchos]
ENSAPLG00020000687	47.1027	19.619	-1.26356	4.68e-06	5.02e-05	GNPAT	XP_027309996.2 dihydroxyacetone phosphate acyltransferase isoform X1 [Anas platyrhynchos]
ENSAPLG00020013964	33.655	78.0883	1.21429	4.74e-06	5.08e-05	Grasp	XP_038028522.1 protein TAMALIN isoform X2 [Anas platyrhynchos]
ENSAPLG00020009919	6.672	1.06667	-2.64501	4.81e-06	5.16e-05	Snap91	EOA97554.1 Clathrin coat assembly protein AP180, partial [Anas platyrhynchos]
ENSAPLG00020013091	1.35967	5.29967	1.96265	4.89e-06	5.24e-05	St14	XP_038023569.1 LOW QUALITY PROTEIN: suppressor of tumorigenicity 14 protein [Anas platyrhynchos]
MSTRG.4171	64.49	20.6173	-1.64522	4.91e-06	5.26e-05	--	XP_038040136.1 taxid=8839 uncharacterized protein LOC119717843 isoform X2 [Anas platyrhynchos]
ENSAPLG00020018191	5.53233	0.521	-3.40853	4.92e-06	5.26e-05	Ttc25	XP_027300994.1 tetratricopeptide repeat protein 25 isoform X1 [Anas platyrhynchos]
MSTRG.6883	0.0703333	3.56633	5.66409	4.92e-06	5.26e-05	SMTN	XP_038043549.1 taxid=8839 LOW QUALITY PROTEIN: smoothelin [Anas platyrhynchos]
MSTRG.8853	7.279	2.22933	-1.70713	4.95e-06	5.29e-05	clasp1-a	XP_038031503.1 taxid=8839 translation initiation factor IF-2-like isoform X2 [Anas platyrhynchos]
ENSAPLG00020017231	18.309	54.2073	1.56594	5.01e-06	5.35e-05	NSRP1	EOA98703.1 Coiled-coil domain-containing protein 55, partial [Anas platyrhynchos]
ENSAPLG00020012301	1.94167	9.93633	2.35542	5.12e-06	5.46e-05	OR10K2	XP_038041838.1 guanylate-binding protein 1-like [Anas platyrhynchos]
ENSAPLG00020005013	22.267	71.1747	1.67646	5.16e-06	5.5e-05	SEPTIN11	XP_039565417.1 septin-11 isoform X4 [Passer montanus]
ENSAPLG00020008836	30.7503	79.2397	1.36562	5.18e-06	5.52e-05	SEC61B	NP_001289088.1 protein transport protein Sec61 subunit beta [Gallus gallus]
MSTRG.7983	0.368	2.53867	2.78629	5.23e-06	5.57e-05	--	EOB02271.1 taxid=8839 hypothetical protein Anapl_09357 [Anas platyrhynchos]
ENSAPLG00020005917	20.912	55.1327	1.39858	5.24e-06	5.58e-05	TNIP1	XP_035194709.1 TNFAIP3-interacting protein 1 isoform X3 [Oxyura jamaicensis]
ENSAPLG00020013402	5.404	1.13167	-2.25558	5.36e-06	5.7e-05	Pgap1	XP_027317593.2 GPI inositol-deacylase isoform X1 [Anas platyrhynchos]
ENSAPLG00020001395	49.6637	22.2403	-1.15901	5.37e-06	5.71e-05	Vps8	XP_027319813.1 vacuolar protein sorting-associated protein 8 homolog isoform X2 [Anas platyrhynchos]
MSTRG.21852	6.63567	1.60133	-2.05097	5.38e-06	5.72e-05	--	EOA93012.1 taxid=8839 hypothetical protein Anapl_16355 [Anas platyrhynchos]
ENSAPLG00020003758	100.61	322.244	1.67938	5.4e-06	5.73e-05	SLC2A6	XP_027326522.1 solute carrier family 2, facilitated glucose transporter member 6 [Anas platyrhynchos]
ENSAPLG00020004084	0.142	2.40533	4.08227	5.44e-06	5.77e-05	CHRNB3	XP_038026639.1 neuronal acetylcholine receptor subunit beta-3 isoform X1 [Anas platyrhynchos]
ENSAPLG00020014830	492.198	222.864	-1.14307	5.45e-06	5.77e-05	MGST1	EOB03136.1 Microsomal glutathione S-transferase 1, partial [Anas platyrhynchos]
ENSAPLG00020002034	51.151	23.3477	-1.13148	5.53e-06	5.85e-05	GAB1	XP_038033897.1 GRB2-associated-binding protein 1 isoform X1 [Anas platyrhynchos]
ENSAPLG00020012104	0.026	2.42	6.54035	5.54e-06	5.86e-05	CD163	XP_038028118.1 scavenger receptor cysteine-rich type 1 protein M130-like [Anas platyrhynchos]
ENSAPLG00020001031	0.001	2.58067	11.3335	5.56e-06	5.88e-05	HTR2A	XP_027327501.1 5-hydroxytryptamine receptor 2A [Anas platyrhynchos]
ENSAPLG00020004666	17.37	40.518	1.22197	5.6e-06	5.92e-05	FBXO46	XP_038028087.1 LOW QUALITY PROTEIN: F-box only protein 46 [Anas platyrhynchos]
ENSAPLG00020003797	12.812	35.9003	1.4865	5.63e-06	5.94e-05	PDE4D	XP_032061277.1 cAMP-specific 3',5'-cyclic phosphodiesterase 4D isoform X2 [Aythya fuligula]
ENSAPLG00020004833	55.068	23.4077	-1.23423	5.67e-06	5.98e-05	DGCR2	XP_027326053.1 integral membrane protein DGCR2/IDD isoform X2 [Anas platyrhynchos]
ENSAPLG00020012487	0.0676667	2.25633	5.05939	5.7e-06	6.01e-05	GABRR2	XP_005012420.1 gamma-aminobutyric acid receptor subunit rho-2 isoform X1 [Anas platyrhynchos]
ENSAPLG00020018398	187.251	80.9353	-1.21013	5.71e-06	6.02e-05	Dpp7	XP_027326462.2 dipeptidyl peptidase 2 [Anas platyrhynchos]
ENSAPLG00020003128	60.204	25.1263	-1.26066	5.83e-06	6.14e-05	Ldlrap1	XP_032058061.1 low density lipoprotein receptor adapter protein 1 isoform X2 [Aythya fuligula]
ENSAPLG00020011169	1.076	6.11133	2.50581	5.86e-06	6.16e-05	GFI1	XP_038039159.1 zinc finger protein Gfi-1 isoform X1 [Anas platyrhynchos]
ENSAPLG00020014332	4.779	14.5083	1.6021	5.91e-06	6.21e-05	Csrnp2	XP_038027507.1 cysteine/serine-rich nuclear protein 2 isoform X1 [Anas platyrhynchos]
ENSAPLG00020013298	11.383	132.135	3.53706	5.97e-06	6.27e-05	CCL20	XP_005025540.1 C-C motif chemokine 20 [Anas platyrhynchos]
ENSAPLG00020004779	42.6003	15.3983	-1.46809	6e-06	6.29e-05	SLC25A10	XP_027327396.1 mitochondrial dicarboxylate carrier isoform X1 [Anas platyrhynchos]
ENSAPLG00020007810	6.38733	16.147	1.33798	6.04e-06	6.34e-05	SYT11	XP_032060236.1 synaptotagmin-11 isoform X1 [Aythya fuligula]
ENSAPLG00020001532	23.3323	9.21	-1.34106	6.16e-06	6.45e-05	PHKA2	XP_027303992.1 phosphorylase b kinase regulatory subunit alpha, liver isoform isoform X1 [Anas platyrhynchos]
ENSAPLG00020007198	53.2383	22.3067	-1.25499	6.3e-06	6.6e-05	CYP4V2	XP_005009034.1 cytochrome P450 4V2 [Anas platyrhynchos]
ENSAPLG00020011019	192.339	91.604	-1.07017	6.42e-06	6.72e-05	BMP2K	XP_027312793.2 BMP-2-inducible protein kinase isoform X1 [Anas platyrhynchos]
ENSAPLG00020006472	1.24633	0.001	-10.2835	6.49e-06	6.79e-05	Scube1	XP_027305869.1 signal peptide, CUB and EGF-like domain-containing protein 1 isoform X2 [Anas platyrhynchos]
ENSAPLG00020007377	0.638333	3.74833	2.55387	6.53e-06	6.82e-05	ACAP3	XP_040389299.1 arf-GAP with coiled-coil, ANK repeat and PH domain-containing protein 3 isoform X6 [Cygnus olor]
ENSAPLG00020013532	0.18	4.56767	4.66539	6.55e-06	6.84e-05	MYZAP	XP_032050509.1 myocardial zonula adherens protein isoform X1 [Aythya fuligula]
ENSAPLG00020014064	46.7423	147.92	1.66201	6.55e-06	6.84e-05	C3AR1	XP_027305660.2 C3a anaphylatoxin chemotactic receptor [Anas platyrhynchos]
ENSAPLG00020005904	3.85767	14.9243	1.95187	6.68e-06	6.96e-05	PARM1	XP_027311916.2 prostate androgen-regulated mucin-like protein 1 [Anas platyrhynchos]
ENSAPLG00020006262	553.604	258.057	-1.10117	6.78e-06	7.07e-05	MFSD1	XP_027320514.1 major facilitator superfamily domain-containing protein 1 isoform X1 [Anas platyrhynchos]
ENSAPLG00020009961	10.8457	2.99033	-1.85874	6.78e-06	7.07e-05	ACAD11	XP_021129937.3 acyl-CoA dehydrogenase family member 11 [Anas platyrhynchos]
ENSAPLG00020008334	0.119333	3.71967	4.9621	6.89e-06	7.18e-05	--	XP_038026624.1 uncharacterized protein LOC106020613 [Anas platyrhynchos]
ENSAPLG00020014301	32.1523	12.3683	-1.37827	7.07e-06	7.36e-05	LRMDA	XP_038036881.1 leucine-rich melanocyte differentiation-associated protein isoform X4 [Anas platyrhynchos]
ENSAPLG00020007086	3.713	18.0387	2.28044	7.1e-06	7.39e-05	MCOLN2	XP_027318817.1 mucolipin-2 isoform X2 [Anas platyrhynchos]
ENSAPLG00020017686	49.8507	12.6277	-1.98102	7.21e-06	7.49e-05	TSPAN4	XP_027315500.1 tetraspanin-4 isoform X2 [Anas platyrhynchos]
ENSAPLG00020009896	23.8593	7.831	-1.60729	7.34e-06	7.62e-05	AGA	XP_027312202.1 N(4)-(beta-N-acetylglucosaminyl)-L-asparaginase isoform X1 [Anas platyrhynchos]
ENSAPLG00020000140	5.65933	18.9167	1.74095	7.46e-06	7.73e-05	LACC1	EOB09124.1 UPF0124 protein C13orf31, partial [Anas platyrhynchos]
ENSAPLG00020017230	5458.14	11847.4	1.11809	7.55e-06	7.83e-05	PRDX1	EOB00368.1 Peroxiredoxin-1, partial [Anas platyrhynchos]
ENSAPLG00020017947	9.98433	2.997	-1.73615	7.66e-06	7.94e-05	TACC2	XP_038037431.1 transforming acidic coiled-coil-containing protein 2 isoform X3 [Anas platyrhynchos]
ENSAPLG00020001363	147.654	299.429	1.01999	7.67e-06	7.94e-05	Nt5c1b	XP_027311072.1 cytosolic 5'-nucleotidase 1B [Anas platyrhynchos]
ENSAPLG00020006847	135.219	62.2883	-1.11826	7.71e-06	7.98e-05	STX7	XP_032040775.1 syntaxin-7 [Aythya fuligula]
ENSAPLG00020002526	0.731667	2.72267	1.89576	7.78e-06	8.04e-05	ALPK2	XP_021130701.3 alpha-protein kinase 2 isoform X1 [Anas platyrhynchos]
ENSAPLG00020002137	1802.97	3776.46	1.06666	7.81e-06	8.07e-05	ACTG1	KYO39905.1 hypothetical protein Y1Q_0007443 [Alligator mississippiensis]
MSTRG.12642	34.3957	12.7717	-1.42928	7.82e-06	8.08e-05	Prag1	XP_021135085.2 taxid=8839 protein PEAK3 [Anas platyrhynchos]
ENSAPLG00020012929	787.538	342.915	-1.1995	7.94e-06	8.19e-05	RAB32	XP_005021608.1 ras-related protein Rab-32 [Anas platyrhynchos]
ENSAPLG00020004322	18.0803	7.28967	-1.3105	8.03e-06	8.28e-05	Txnrd2	XP_027325644.2 thioredoxin reductase 2, mitochondrial isoform X1 [Anas platyrhynchos]
ENSAPLG00020017811	6.117	22.3923	1.87211	8.06e-06	8.31e-05	Traf5	XP_038032447.1 TNF receptor-associated factor 5 isoform X1 [Anas platyrhynchos]
ENSAPLG00020009427	2.84367	9.32467	1.7133	8.13e-06	8.37e-05	Slc35e4	XP_032054910.1 solute carrier family 35 member E4 [Aythya fuligula]
ENSAPLG00020007503	0.574667	6.61233	3.52436	8.13e-06	8.37e-05	ADORA3	XP_005013732.1 adenosine receptor A3 [Anas platyrhynchos]
MSTRG.13138	0.085	2.75833	5.02019	8.19e-06	8.42e-05	--	-
ENSAPLG00020001155	0.195	8.912	5.5142	8.24e-06	8.47e-05	CABCOCO1	XP_013029309.1 PREDICTED: uncharacterized protein C10orf107 homolog isoform X4 [Anser cygnoides domesticus]
MSTRG.8314	0.0383333	2.89	6.23633	8.31e-06	8.53e-05	--	-
ENSAPLG00020016741	11.1703	45.009	2.01054	8.35e-06	8.57e-05	GPR141	XP_032036963.1 probable G-protein coupled receptor 141 [Aythya fuligula]
ENSAPLG00020011784	58.2387	24.64	-1.24098	8.37e-06	8.58e-05	DHX37	XP_027325695.1 probable ATP-dependent RNA helicase DHX37 [Anas platyrhynchos]
ENSAPLG00020007156	44.4517	18.0533	-1.29997	8.39e-06	8.6e-05	PIKFYVE	EOB03312.1 FYVE finger-containing phosphoinositide kinase, partial [Anas platyrhynchos]
ENSAPLG00020016120	21.97	72.139	1.71524	8.41e-06	8.62e-05	CASS4	XP_012960836.3 cas scaffolding protein family member 4 isoform X3 [Anas platyrhynchos]
ENSAPLG00020015091	35.327	12.491	-1.49988	8.45e-06	8.65e-05	SIAH2	XP_038039672.1 LOW QUALITY PROTEIN: E3 ubiquitin-protein ligase SIAH2 [Anas platyrhynchos]
ENSAPLG00020009608	21.0257	7.531	-1.48124	8.47e-06	8.65e-05	Kif21a	XP_027314695.1 kinesin-like protein KIF21A isoform X3 [Anas platyrhynchos]
ENSAPLG00020007501	246.095	93.2617	-1.39986	8.47e-06	8.65e-05	PEBP1	XP_027326080.1 phosphatidylethanolamine-binding protein 1 [Anas platyrhynchos]
ENSAPLG00020009376	51.4593	20.6173	-1.31958	8.63e-06	8.81e-05	MAP3K3	XP_027301061.1 mitogen-activated protein kinase kinase kinase 3 isoform X1 [Anas platyrhynchos]
ENSAPLG00020003827	19.5263	70.4163	1.85049	8.64e-06	8.82e-05	F11R	XP_035426635.1 junctional adhesion molecule A [Cygnus atratus]
ENSAPLG00020009224	65.1393	29.2553	-1.15483	8.68e-06	8.85e-05	SLC39A6	XP_005010667.1 zinc transporter ZIP6 isoform X1 [Anas platyrhynchos]
ENSAPLG00020003646	2.44167	11.095	2.18397	8.69e-06	8.85e-05	gpr146	XP_042720749.1 probable G-protein coupled receptor 146 isoform X2 [Lagopus leucura]
ENSAPLG00020013836	17.091	4.61267	-1.88956	8.92e-06	9.08e-05	HDHD5	XP_038036730.1 haloacid dehalogenase-like hydrolase domain-containing 5 [Anas platyrhynchos]
ENSAPLG00020003200	57.2373	17.7717	-1.68738	8.97e-06	9.13e-05	Pts	XP_027300128.1 6-pyruvoyl tetrahydrobiopterin synthase isoform X3 [Anas platyrhynchos]
ENSAPLG00020007035	10.9993	29.8587	1.44073	9e-06	9.15e-05	SYDE2	XP_027318595.2 rho GTPase-activating protein SYDE2 isoform X1 [Anas platyrhynchos]
ENSAPLG00020010008	17.657	53.4197	1.59713	9.03e-06	9.18e-05	--	XP_027304463.1 uncharacterized protein LOC113841983 [Anas platyrhynchos]
ENSAPLG00020001149	0.0936667	2.90367	4.9542	9.07e-06	9.21e-05	PRTFDC1	XP_027306425.1 phosphoribosyltransferase domain-containing protein 1 isoform X1 [Anas platyrhynchos]
ENSAPLG00020017918	0.001	2.66067	11.3776	9.08e-06	9.21e-05	HMX3	XP_035403736.1 homeobox protein HMX3 [Cygnus atratus]
ENSAPLG00020005085	16.1783	37.7653	1.223	9.19e-06	9.32e-05	PLAGL1	XP_038032490.1 zinc finger protein PLAGL1 isoform X1 [Anas platyrhynchos]
ENSAPLG00020007661	23.55	7.84533	-1.58582	9.19e-06	9.32e-05	Dcaf10	XP_038027232.1 DDB1- and CUL4-associated factor 10 isoform X1 [Anas platyrhynchos]
MSTRG.13976	10.5113	2.86967	-1.87299	9.26e-06	9.38e-05	PIGM	XP_005023671.2 taxid=8839 GPI mannosyltransferase 1 [Anas platyrhynchos]
ENSAPLG00020009185	5.03333	12.978	1.36648	9.46e-06	9.57e-05	SLC39A3	XP_027327638.1 zinc transporter ZIP3 [Anas platyrhynchos]
ENSAPLG00020014700	54.0767	20.7887	-1.37921	9.51e-06	9.62e-05	SGK3	EOB01521.1 Serine/threonine-protein kinase Sgk3, partial [Anas platyrhynchos]
ENSAPLG00020004767	35.1197	14.5483	-1.27143	9.53e-06	9.63e-05	NLN	XP_027302169.1 neurolysin, mitochondrial isoform X1 [Anas platyrhynchos]
ENSAPLG00020001298	2.71833	10.981	2.01422	9.74e-06	9.84e-05	slc22a15b	XP_027319606.1 solute carrier family 22 member 15-like isoform X1 [Anas platyrhynchos]
ENSAPLG00020016624	92.6667	200.308	1.1121	9.74e-06	9.84e-05	CBFB	XP_008109947.1 PREDICTED: core-binding factor subunit beta isoform X2 [Anolis carolinensis]
ENSAPLG00020001772	0.847333	5.54367	2.70984	1e-05	0.000100927	MEP1A	XP_005025604.3 LOW QUALITY PROTEIN: meprin A subunit alpha [Anas platyrhynchos]
ENSAPLG00020008961	0.001	1.64167	10.6809	1.01e-05	0.000102013	nodal	XP_038023062.1 nodal homolog [Anas platyrhynchos]
ENSAPLG00020005359	0.453333	15.5957	5.10443	1.03e-05	0.000103349	HOXD9	XP_035187792.1 homeobox protein Hox-D9 isoform X2 [Oxyura jamaicensis]
ENSAPLG00020003601	31.8423	13.2033	-1.27004	1.05e-05	0.000105227	Fsd1l	XP_038026143.1 FSD1-like protein isoform X2 [Anas platyrhynchos]
ENSAPLG00020001971	4.52667	1.10567	-2.03353	1.05e-05	0.000105537	PTPRF	XP_038039280.1 receptor-type tyrosine-protein phosphatase F isoform X6 [Anas platyrhynchos]
MSTRG.16337	0.0603333	4.271	6.14547	1.05e-05	0.000105999	IL12B	XP_038034251.1 taxid=8839 interleukin-12 subunit beta-like [Anas platyrhynchos]
ENSAPLG00020001245	43.2873	116.716	1.43099	1.06e-05	0.000106078	RHOB	NP_990240.1 rho-related GTP-binding protein RhoB [Gallus gallus]
ENSAPLG00020005224	16.7333	41.0593	1.29499	1.06e-05	0.000106101	CHAF1B	XP_012948775.2 chromatin assembly factor 1 subunit B [Anas platyrhynchos]
ENSAPLG00020004966	615.351	275.672	-1.15846	1.06e-05	0.000106813	FUCA2	XP_027310223.2 plasma alpha-L-fucosidase [Anas platyrhynchos]
ENSAPLG00020011004	8.228	26.4167	1.68283	1.09e-05	0.000109151	SUB1	XP_010725131.1 LOW QUALITY PROTEIN: activated RNA polymerase II transcriptional coactivator p15-like [Meleagris gallopavo]
ENSAPLG00020015725	48.8513	21.7167	-1.1696	1.09e-05	0.000109332	CHRNB4	XP_005027977.1 neuronal acetylcholine receptor subunit beta-4 isoform X1 [Anas platyrhynchos]
ENSAPLG00020006709	1.75467	5.377	1.6156	1.1e-05	0.00010971	Ahdc1	XP_038023117.1 AT-hook DNA-binding motif-containing protein 1 [Anas platyrhynchos]
ENSAPLG00020005263	0.001	1.83133	10.8387	1.1e-05	0.00010971	SIM2	XP_005012946.1 single-minded homolog 2 [Anas platyrhynchos]
ENSAPLG00020016232	1188.63	562.291	-1.07991	1.1e-05	0.000110266	Atp6ap1	XP_027313853.1 V-type proton ATPase subunit S1 [Anas platyrhynchos]
ENSAPLG00020006667	17.034	5.247	-1.69885	1.11e-05	0.000110933	RGL1	XP_038039081.1 ral guanine nucleotide dissociation stimulator-like 1 isoform X1 [Anas platyrhynchos]
ENSAPLG00020003589	0.001	2.213	11.1118	1.11e-05	0.000111198	PPP1R1A	XP_035426251.1 protein phosphatase 1 regulatory subunit 1A [Cygnus atratus]
ENSAPLG00020000639	2.979	0.0993333	-4.90641	1.11e-05	0.000111198	SLC6A15	EOB02115.1 Orphan sodium- and chloride-dependent neurotransmitter transporter NTT73, partial [Anas platyrhynchos]
MSTRG.16435	0.0573333	5.26467	6.52082	1.14e-05	0.000113606	--	XP_027311445.2 taxid=8839 cilia- and flagella-associated protein 99 [Anas platyrhynchos]
MSTRG.15873	0.715667	4.06833	2.50708	1.15e-05	0.000114607	--	-
ENSAPLG00020006059	22.4237	64.283	1.51942	1.15e-05	0.000114958	Dtx2	XP_027327868.1 probable E3 ubiquitin-protein ligase DTX2 isoform X4 [Anas platyrhynchos]
ENSAPLG00020008928	162.002	487.304	1.58881	1.16e-05	0.00011531	ITGB1	XP_027306336.1 integrin beta-1 isoform X2 [Anas platyrhynchos]
ENSAPLG00020002144	68.5133	24.131	-1.5055	1.16e-05	0.000115862	FLOT2	XP_009949061.1 PREDICTED: flotillin-2 [Leptosomus discolor]
ENSAPLG00020004485	7.39833	19.3457	1.38674	1.17e-05	0.000115935	HELQ	XP_027312698.1 helicase POLQ-like isoform X1 [Anas platyrhynchos]
ENSAPLG00020002255	14.7567	35.8687	1.28136	1.19e-05	0.000118001	ENG	XP_038021092.1 LOW QUALITY PROTEIN: endoglin [Anas platyrhynchos]
ENSAPLG00020010825	9.25033	28.241	1.61021	1.21e-05	0.000119997	--	XP_013049165.1 PREDICTED: uncharacterized protein LOC106043945 isoform X1 [Anser cygnoides domesticus]
ENSAPLG00020010902	5.37433	17.651	1.71559	1.21e-05	0.000120505	CD200	XP_040424373.1 OX-2 membrane glycoprotein-like isoform X2 [Cygnus olor]
ENSAPLG00020006324	47.002	17.3733	-1.43585	1.22e-05	0.000120663	ARHGAP18	XP_038033024.1 rho GTPase-activating protein 18 isoform X1 [Anas platyrhynchos]
ENSAPLG00020000658	52.2207	15.345	-1.76685	1.22e-05	0.000120668	MROH1	XP_038030603.1 maestro heat-like repeat-containing protein family member 1 isoform X3 [Anas platyrhynchos]
ENSAPLG00020002121	0.025	2.01833	6.33509	1.23e-05	0.000121254	NEFM	XP_038023039.1 neurofilament medium polypeptide [Anas platyrhynchos]
ENSAPLG00020012046	13.726	4.63333	-1.56679	1.23e-05	0.000121795	Dclk3	XP_027307340.1 serine/threonine-protein kinase DCLK3 isoform X3 [Anas platyrhynchos]
ENSAPLG00020000677	36.1073	84.891	1.23332	1.23e-05	0.000121795	ANKRD28	EOB01135.1 Ankyrin repeat domain-containing protein 28, partial [Anas platyrhynchos]
ENSAPLG00020012608	166.928	345.154	1.04802	1.25e-05	0.000123116	NMRK2	XP_005018732.1 nicotinamide riboside kinase 2 [Anas platyrhynchos]
ENSAPLG00020013900	30.351	10.42	-1.54239	1.25e-05	0.000123306	CYP2C19	XP_027316280.2 cytochrome P450 2C9-like [Anas platyrhynchos]
ENSAPLG00020016537	2.14767	8.02767	1.90221	1.25e-05	0.000123456	HOOK1	XP_027318477.1 protein Hook homolog 1 isoform X3 [Anas platyrhynchos]
ENSAPLG00020015249	1.04167	6.03333	2.53406	1.25e-05	0.000123568	PCOLCE2	XP_032049445.1 procollagen C-endopeptidase enhancer 2 [Aythya fuligula]
ENSAPLG00020009507	70.218	30.4663	-1.20463	1.26e-05	0.000124298	RRN3	XP_027324812.1 RNA polymerase I-specific transcription initiation factor RRN3 [Anas platyrhynchos]
MSTRG.6071	385.532	138.267	-1.4794	1.27e-05	0.000124716	Abca3	XP_038043013.1 taxid=8839 ATP-binding cassette sub-family A member 3 isoform X1 [Anas platyrhynchos]
MSTRG.19862	4.70967	0.294	-4.00174	1.27e-05	0.000124716	--	-
ENSAPLG00020016880	8.31167	133.782	4.0086	1.3e-05	0.000127994	TRGC1	NP_001297751.1 TCR gamma alternate reading frame protein precursor [Anas platyrhynchos]
ENSAPLG00020003918	138.864	67.1793	-1.04759	1.3e-05	0.000127994	FNTA	XP_032062037.1 protein farnesyltransferase/geranylgeranyltransferase type-1 subunit alpha [Aythya fuligula]
ENSAPLG00020012819	9.57967	0.825333	-3.53693	1.32e-05	0.000129803	CD5L	XP_038035159.1 CD5 antigen-like [Anas platyrhynchos]
ENSAPLG00020008257	43.4077	15.5753	-1.47869	1.32e-05	0.000129835	WDR41	XP_038026528.1 WD repeat-containing protein 41 isoform X1 [Anas platyrhynchos]
ENSAPLG00020011893	2.38367	0.255	-3.22461	1.33e-05	0.000130425	RIMBP2	XP_021127031.1 RIMS-binding protein 2 isoform X2 [Anas platyrhynchos]
MSTRG.11908	25.7593	70.748	1.45759	1.33e-05	0.000130564	PPP1R15B	XP_012959390.3 taxid=8839 protein phosphatase 1 regulatory subunit 15B [Anas platyrhynchos]
ENSAPLG00020005461	0.167333	2.792	4.0605	1.34e-05	0.00013133	SFN	XP_012952953.2 14-3-3 protein sigma [Anas platyrhynchos]
ENSAPLG00020017787	31.6	69.84	1.14413	1.34e-05	0.0001314	IRF2BP2	XP_039235464.1 interferon regulatory factor 2-binding protein 2 isoform X1 [Pipra filicauda]
MSTRG.1370	41.837	15.876	-1.39793	1.35e-05	0.000132046	--	XP_005012717.1 taxid=8839 NKG2-A/NKG2-B type II integral membrane protein-like isoform X1 [Anas platyrhynchos]
ENSAPLG00020000295	85.3097	36.94	-1.20753	1.37e-05	0.000133494	SNTB1	XP_035173947.1 beta-1-syntrophin [Oxyura jamaicensis]
ENSAPLG00020008844	36.5307	79.5653	1.12303	1.38e-05	0.000134425	ALG2	XP_005027778.4 alpha-1,3/1,6-mannosyltransferase ALG2 [Anas platyrhynchos]
ENSAPLG00020004043	168.66	80.7563	-1.06247	1.38e-05	0.000134565	HSD17B4	XP_027302157.2 peroxisomal multifunctional enzyme type 2 isoform X1 [Anas platyrhynchos]
ENSAPLG00020001539	192.92	58.6723	-1.71725	1.39e-05	0.00013583	PAQR8	XP_012949825.1 membrane progestin receptor beta isoform X1 [Anas platyrhynchos]
ENSAPLG00020014190	10.37	31.8183	1.61744	1.4e-05	0.000136803	TNFSF11	XP_027328069.1 tumor necrosis factor ligand superfamily member 11 [Anas platyrhynchos]
ENSAPLG00020001146	0.001	2.64633	11.3698	1.42e-05	0.000137957	mfsd2b	EOB06189.1 Major facilitator superfamily domain-containing protein LOC388931-like protein, partial [Anas platyrhynchos]
ENSAPLG00020004386	30.2147	71.1597	1.23581	1.42e-05	0.000137979	FNTB	XP_032045010.1 protein farnesyltransferase subunit beta-like [Aythya fuligula]
ENSAPLG00020003012	5.44133	21.549	1.98559	1.42e-05	0.000137979	SKAP1	XP_038024871.1 src kinase-associated phosphoprotein 1 isoform X1 [Anas platyrhynchos]
ENSAPLG00020008496	422.412	143.525	-1.55735	1.44e-05	0.000139797	MROH1	XP_038030604.1 maestro heat-like repeat-containing protein family member 1 isoform X4 [Anas platyrhynchos]
ENSAPLG00020016141	20.4567	8.27	-1.30661	1.45e-05	0.000140424	DDR2	XP_032055972.1 discoidin domain-containing receptor 2-like isoform X2 [Aythya fuligula]
ENSAPLG00020014719	488.982	243.767	-1.00428	1.46e-05	0.000141264	PTP4A1	NP_001008461.1 protein tyrosine phosphatase type IVA 1 [Gallus gallus]
ENSAPLG00020014280	32.381	80.5643	1.31499	1.48e-05	0.000143416	MEF2A	XP_012947197.1 myocyte-specific enhancer factor 2A isoform X1 [Anas platyrhynchos]
ENSAPLG00020013320	58.2617	24.3997	-1.25569	1.48e-05	0.00014354	TBC1D12	XP_038037505.1 TBC1 domain family member 12 isoform X2 [Anas platyrhynchos]
ENSAPLG00020000822	75.4317	31.9493	-1.23938	1.49e-05	0.00014464	C11orf24	XP_027314318.1 uncharacterized protein C11orf24 homolog [Anas platyrhynchos]
ENSAPLG00020001603	414.54	1098.15	1.40549	1.5e-05	0.000145596	LY6E	XP_027308579.1 lymphocyte antigen 6E [Anas platyrhynchos]
ENSAPLG00020018006	4.34667	16.2407	1.90163	1.51e-05	0.000145807	BTBD11	XP_027305684.1 ankyrin repeat and BTB/POZ domain-containing protein BTBD11 isoform X4 [Anas platyrhynchos]
ENSAPLG00020000506	0.001	2.11833	11.0487	1.51e-05	0.000145923	DLX5	XP_027306634.1 homeobox protein DLX-5 [Anas platyrhynchos]
ENSAPLG00020014403	0.114333	2.17533	4.24992	1.52e-05	0.000146878	ogdhl	XP_027316178.1 2-oxoglutarate dehydrogenase-like, mitochondrial [Anas platyrhynchos]
ENSAPLG00020016309	183.541	83.8643	-1.12997	1.53e-05	0.00014749	SCP2	XP_027318727.1 non-specific lipid-transfer protein [Anas platyrhynchos]
MSTRG.11864	12.1213	3.739	-1.69682	1.53e-05	0.00014749	IGFN1	XP_038024228.1 taxid=8839 immunoglobulin-like and fibronectin type III domain-containing protein 1 isoform X2 [Anas platyrhynchos]
ENSAPLG00020015111	649.991	271.832	-1.25771	1.55e-05	0.000149582	Nadk	XP_005011116.1 NAD kinase isoform X1 [Anas platyrhynchos]
ENSAPLG00020001912	11.471	25.8793	1.17381	1.55e-05	0.000149879	PTK2	XP_038031581.1 focal adhesion kinase 1 isoform X2 [Anas platyrhynchos]
ENSAPLG00020015575	0.0776667	5.11433	6.04111	1.56e-05	0.000150108	--	XP_038025110.1 uncharacterized protein LOC101794304 isoform X1 [Anas platyrhynchos]
ENSAPLG00020000601	0.328	6.98367	4.41222	1.58e-05	0.000151677	OR5V1	XP_027314754.2 olfactory receptor 5F1-like [Anas platyrhynchos]
MSTRG.11248	0.898667	7.03967	2.96965	1.59e-05	0.000152799	--	EOB00793.1 taxid=8839 hypothetical protein Anapl_14651 [Anas platyrhynchos]
ENSAPLG00020003406	5.60867	0.781333	-2.84365	1.59e-05	0.000152998	MAP2K6	XP_032055471.1 dual specificity mitogen-activated protein kinase kinase 6 [Aythya fuligula]
ENSAPLG00020017749	32.2387	73.3007	1.18503	1.6e-05	0.000153169	Tlnrd1	XP_027322521.1 talin rod domain-containing protein 1 [Anas platyrhynchos]
MSTRG.508	0.001	3.339	11.7052	1.6e-05	0.000153687	IL26	EOA96239.1 taxid=8839 Interleukin-26, partial [Anas platyrhynchos]
MSTRG.5015	0.432333	8.494	4.29623	1.6e-05	0.000153735	--	EOA94909.1 taxid=8839 hypothetical protein Anapl_17889 [Anas platyrhynchos]
ENSAPLG00020011901	0.279	3.03567	3.44368	1.61e-05	0.000153933	GIMAP2	XP_038030387.1 GTPase IMAP family member 8-like isoform X3 [Anas platyrhynchos]
ENSAPLG00020003622	0.001	2.32667	11.184	1.66e-05	0.000158502	WNT9A	XP_005527858.1 PREDICTED: protein Wnt-9a [Pseudopodoces humilis]
ENSAPLG00020005321	31.7223	7.91367	-2.00308	1.67e-05	0.000159805	foxi1c	XP_027311563.1 forkhead box protein I3 [Anas platyrhynchos]
ENSAPLG00020012905	0.936667	6.48267	2.79098	1.67e-05	0.000159805	HCRTR2	XP_005009237.1 orexin receptor type 2 isoform X1 [Anas platyrhynchos]
ENSAPLG00020001301	0.001	2.78433	11.4431	1.69e-05	0.000161311	Sox7	XP_027311203.1 transcription factor SOX-7 [Anas platyrhynchos]
ENSAPLG00020015092	14.0677	32.4003	1.20363	1.7e-05	0.000162065	CDK17	KAF1499957.1 Cyclin-dependent kinase 17, partial [Megadyptes antipodes antipodes]
ENSAPLG00020000667	0.001	0.625333	9.28848	1.71e-05	0.000163081	Scn5a	XP_038030677.1 sodium channel protein type 5 subunit alpha isoform X1 [Anas platyrhynchos]
MSTRG.16333	3.54133	14.1227	1.99565	1.72e-05	0.000163852	BNIP3L	XP_032042882.1 taxid=219594 BCL2/adenovirus E1B 19 kDa protein-interacting protein 3-like [Aythya fuligula]
ENSAPLG00020010962	20.6673	4.907	-2.07444	1.72e-05	0.000163852	Pcyt1b	XP_038024814.1 choline-phosphate cytidylyltransferase B isoform X4 [Anas platyrhynchos]
ENSAPLG00020016159	69.842	29.6353	-1.23678	1.72e-05	0.000164024	PPP4R1	XP_027328894.1 serine/threonine-protein phosphatase 4 regulatory subunit 1 isoform X1 [Anas platyrhynchos]
MSTRG.18369	0.001	2.695	11.3961	1.76e-05	0.000167208	C1QL2	XP_040418077.1 taxid=8869 complement C1q-like protein 2 isoform X1 [Cygnus olor]
ENSAPLG00020015816	14.7617	3.191	-2.20978	1.76e-05	0.000167208	CORO2A	XP_038026390.1 coronin-2A [Anas platyrhynchos]
ENSAPLG00020015175	61.2543	27.5533	-1.15259	1.78e-05	0.000169297	CCDC6	XP_015721735.1 coiled-coil domain-containing protein 6 isoform X1 [Coturnix japonica]
ENSAPLG00020003347	8.50467	20.6163	1.27746	1.8e-05	0.000170936	Arhgap39	XP_038022376.1 rho GTPase-activating protein 39-like isoform X1 [Anas platyrhynchos]
MSTRG.21641	5.082	16.4557	1.69512	1.81e-05	0.000171707	--	XP_040399243.1 taxid=8869 endogenous retrovirus group 3 member 1 Env polyprotein-like isoform X1 [Cygnus olor]
ENSAPLG00020016461	27.8263	78.067	1.48826	1.81e-05	0.000171707	RFFL	XP_005010702.3 E3 ubiquitin-protein ligase rififylin isoform X3 [Anas platyrhynchos]
ENSAPLG00020007844	19.973	7.005	-1.51159	1.82e-05	0.00017203	GPAM	XP_038037381.1 glycerol-3-phosphate acyltransferase 1, mitochondrial isoform X2 [Anas platyrhynchos]
MSTRG.2797	3.46667	0.233	-3.89515	1.83e-05	0.000173445	Trmt9b	XP_054660671.1 taxid=9117 probable tRNA methyltransferase 9B isoform X1 [Grus americana]
ENSAPLG00020010477	66.886	147.239	1.13838	1.86e-05	0.000175476	OSER1	XP_038022344.1 oxidative stress-responsive serine-rich protein 1 [Anas platyrhynchos]
ENSAPLG00020017237	96.652	42.2853	-1.19264	1.87e-05	0.000176373	BNIP3	XP_014800870.1 PREDICTED: BCL2/adenovirus E1B 19 kDa protein-interacting protein 3-like [Calidris pugnax]
ENSAPLG00020010030	3.88967	0.716667	-2.44027	1.87e-05	0.000176624	Acsm3	XP_005018562.2 acyl-coenzyme A synthetase ACSM3, mitochondrial [Anas platyrhynchos]
ENSAPLG00020013664	8.32933	20.6117	1.30719	1.9e-05	0.000178869	Plcg1	XP_032054227.1 1-phosphatidylinositol 4,5-bisphosphate phosphodiesterase gamma-1 isoform X1 [Aythya fuligula]
ENSAPLG00020006054	23.556	74.9507	1.66985	1.9e-05	0.000178949	EPN3	XP_027327142.2 LOW QUALITY PROTEIN: epsin-3 [Anas platyrhynchos]
MSTRG.12482	0.067	2.86133	5.41638	1.9e-05	0.000179271	--	XP_009893504.1 taxid=50402 PREDICTED: Krueppel-like factor 2 [Charadrius vociferus]
MSTRG.16931	26.134	72.461	1.47128	1.92e-05	0.000180339	--	-
MSTRG.18503	6.69933	1.78233	-1.91025	1.93e-05	0.000181688	--	-
ENSAPLG00020015695	8.01667	1.776	-2.17437	1.95e-05	0.000183683	OXSM	XP_027306880.1 3-oxoacyl-[acyl-carrier-protein] synthase, mitochondrial [Anas platyrhynchos]
MSTRG.19926	0.687667	4.75767	2.79047	1.95e-05	0.000183683	--	XP_038039563.1 taxid=8839 uncharacterized protein LOC110354120 isoform X2 [Anas platyrhynchos]
ENSAPLG00020000708	14.1403	4.48433	-1.65685	1.96e-05	0.0001838	TMEM260	XP_038036177.1 transmembrane protein 260 isoform X2 [Anas platyrhynchos]
ENSAPLG00020014792	27.747	11.57	-1.26194	2.03e-05	0.000190915	GGH	XP_021125530.2 gamma-glutamyl hydrolase [Anas platyrhynchos]
ENSAPLG00020012286	6.22433	20.67	1.73155	2.05e-05	0.000192717	Nyx	XP_038027344.1 nyctalopin isoform X1 [Anas platyrhynchos]
ENSAPLG00020000808	22.1047	48.1787	1.12404	2.06e-05	0.000193148	EURL	XP_038020847.1 protein EURL homolog [Anas platyrhynchos]
ENSAPLG00020001980	49.767	22.564	-1.14117	2.08e-05	0.000194955	ALG5	EOB02124.1 Dolichyl-phosphate beta-glucosyltransferase, partial [Anas platyrhynchos]
ENSAPLG00020012145	114.988	48.398	-1.24846	2.08e-05	0.000195188	ARSA	XP_038039423.1 arylsulfatase A [Anas platyrhynchos]
ENSAPLG00020017661	57.3713	22.8987	-1.32507	2.09e-05	0.00019583	SPTSSA	KAG0120762.1 hypothetical protein IHE44_011929 [Lamprotornis superbus]
MSTRG.9510	3.45467	0.263333	-3.71358	2.11e-05	0.000197161	--	-
ENSAPLG00020017861	238.637	99.5423	-1.26143	2.11e-05	0.000197414	ARL4C	XP_029874743.1 ADP-ribosylation factor-like protein 4C [Aquila chrysaetos chrysaetos]
ENSAPLG00020005234	89.1037	43.48	-1.03513	2.13e-05	0.000198459	Cdk8	KAG6929237.1 cyclin dependent kinase 8, partial [Chelydra serpentina]
MSTRG.8315	0.0246667	1.63067	6.04676	2.14e-05	0.000199701	--	-
ENSAPLG00020011260	99.4787	46.3493	-1.10184	2.15e-05	0.000200598	MEMO1	XP_027309673.1 protein MEMO1 isoform X2 [Anas platyrhynchos]
ENSAPLG00020000943	48.0203	19.8893	-1.27165	2.17e-05	0.000202323	Plcb2	XP_005019225.3 1-phosphatidylinositol 4,5-bisphosphate phosphodiesterase beta-2 isoform X1 [Anas platyrhynchos]
MSTRG.13104	0.456333	6.573	3.84839	2.17e-05	0.000202323	--	KFV78804.1 taxid=441894 hypothetical protein N308_15636, partial [Struthio camelus australis]
ENSAPLG00020007734	127.244	58.5557	-1.11971	2.21e-05	0.000205314	timm21	XP_027307703.1 mitochondrial import inner membrane translocase subunit Tim21 [Anas platyrhynchos]
ENSAPLG00020013567	0.001	2.13133	11.0575	2.21e-05	0.00020559	Trim63	XP_032058363.1 E3 ubiquitin-protein ligase TRIM63 [Aythya fuligula]
ENSAPLG00020016100	56.9387	25.0613	-1.18395	2.21e-05	0.00020559	HMG20A	XP_038040918.1 high mobility group protein 20A isoform X1 [Anas platyrhynchos]
ENSAPLG00020000746	128.041	50.16	-1.352	2.21e-05	0.000205801	GALNT1	NP_001006381.1 polypeptide N-acetylgalactosaminyltransferase 1 [Gallus gallus]
ENSAPLG00020013353	0.387667	2.80533	2.85528	2.22e-05	0.000205866	pol	XP_014810274.1 PREDICTED: uncharacterized protein LOC106895380 [Calidris pugnax]
ENSAPLG00020004813	38.983	79.1613	1.02195	2.23e-05	0.000206626	SLC4A2	XP_038029586.1 anion exchange protein 2 isoform X5 [Anas platyrhynchos]
ENSAPLG00020016454	6.46767	23.3283	1.85077	2.23e-05	0.000206687	TES	XP_027313424.1 testin [Anas platyrhynchos]
ENSAPLG00020001558	42.6843	86.282	1.01535	2.26e-05	0.000209855	CARS1	XP_027314221.1 cysteine--tRNA ligase, cytoplasmic isoform X1 [Anas platyrhynchos]
ENSAPLG00020008316	41.0057	16.5383	-1.31001	2.27e-05	0.000210022	SNX30	XP_038026068.1 sorting nexin-30 [Anas platyrhynchos]
ENSAPLG00020012028	7.46	24.8783	1.73764	2.27e-05	0.000210123	NUP153	XP_038031471.1 nuclear pore complex protein Nup153 isoform X3 [Anas platyrhynchos]
MSTRG.7533	82.9157	41.2737	-1.00642	2.27e-05	0.000210123	Slc31a1	EOA95684.1 taxid=8839 High affinity copper uptake protein 1, partial [Anas platyrhynchos]
MSTRG.1573	22.468	8.64967	-1.37716	2.28e-05	0.00021105	CTC1	XP_027305466.2 taxid=8839 LOW QUALITY PROTEIN: CST complex subunit CTC1 [Anas platyrhynchos]
ENSAPLG00020009586	0.196333	2.54233	3.69478	2.3e-05	0.000212975	jockey\pol	RMC03475.1 hypothetical protein DUI87_20674 [Hirundo rustica rustica]
ENSAPLG00020010111	40.032	18.8357	-1.08769	2.31e-05	0.000213457	KIAA0825	XP_038025697.1 uncharacterized protein KIAA0825 homolog isoform X1 [Anas platyrhynchos]
ENSAPLG00020006821	30.8903	9.98333	-1.62956	2.33e-05	0.000214566	A4GALT	XP_027305840.1 lactosylceramide 4-alpha-galactosyltransferase [Anas platyrhynchos]
ENSAPLG00020010516	542.594	260.499	-1.05859	2.33e-05	0.000214566	SERINC3	XP_038022124.1 serine incorporator 3 [Anas platyrhynchos]
ENSAPLG00020012070	33.5463	77.0267	1.1992	2.34e-05	0.00021533	SERTAD2	XP_027308773.2 SERTA domain-containing protein 2 [Anas platyrhynchos]
ENSAPLG00020004551	0.637667	3.44133	2.43209	2.37e-05	0.000218637	NDST4	XP_012959724.3 bifunctional heparan sulfate N-deacetylase/N-sulfotransferase 4 [Anas platyrhynchos]
ENSAPLG00020005885	0.0873333	5.93367	6.08625	2.38e-05	0.000219531	--	XP_027310771.1 F-box only protein 21 isoform X2 [Anas platyrhynchos]
MSTRG.8941	6.267	0.968	-2.6947	2.4e-05	0.00022059	--	-
ENSAPLG00020007853	37.878	12.9027	-1.55369	2.45e-05	0.000225414	Slc25a4	XP_038033896.1 ADP/ATP translocase 1 [Anas platyrhynchos]
ENSAPLG00020010776	21.5483	7.21467	-1.57857	2.45e-05	0.000225459	NCAPD3	XP_027299947.2 condensin-2 complex subunit D3 [Anas platyrhynchos]
ENSAPLG00020017795	293.235	652.794	1.15457	2.46e-05	0.000225579	CLIC2	XP_027321241.1 chloride intracellular channel protein 2 [Anas platyrhynchos]
ENSAPLG00020002634	0.182333	2.05967	3.49776	2.47e-05	0.000226422	CAPRIN2	XP_038032845.1 caprin-2 isoform X5 [Anas platyrhynchos]
ENSAPLG00020012391	24.3037	56.909	1.22748	2.49e-05	0.000228632	KXD1	XP_027328239.1 kxDL motif-containing protein 1 [Anas platyrhynchos]
ENSAPLG00020003450	27.484	8.91267	-1.62466	2.52e-05	0.000230659	SERHL2	EOB06743.1 Serine hydrolase-like protein 2, partial [Anas platyrhynchos]
ENSAPLG00020015624	58.2843	133.259	1.19305	2.52e-05	0.000231162	UGDH	XP_027313029.2 UDP-glucose 6-dehydrogenase [Anas platyrhynchos]
ENSAPLG00020006908	7.26467	20.2143	1.47641	2.53e-05	0.000231856	VNN1	XP_012952002.3 pantetheinase isoform X2 [Anas platyrhynchos]
ENSAPLG00020006891	1.62933	6.999	2.10287	2.54e-05	0.000232233	BCL11B	XP_027313590.1 B-cell lymphoma/leukemia 11B isoform X2 [Anas platyrhynchos]
ENSAPLG00020012782	0.870667	6.69433	2.94275	2.54e-05	0.000232443	Klrd1	XP_038031016.1 uncharacterized protein LOC101792424 [Anas platyrhynchos]
ENSAPLG00020012804	15.2877	38.5273	1.33351	2.55e-05	0.000232727	SEMA4B	XP_038040748.1 semaphorin-4B isoform X2 [Anas platyrhynchos]
ENSAPLG00020012975	5.55733	16.3157	1.55379	2.59e-05	0.000236268	BTN3A3	XP_027328449.2 butyrophilin subfamily 1 member A1 [Anas platyrhynchos]
MSTRG.11968	66.2367	147.857	1.1585	2.59e-05	0.000236611	ITPR3	XP_032058972.1 taxid=219594 inositol 1,4,5-trisphosphate receptor type 3 isoform X2 [Aythya fuligula]
ENSAPLG00020005345	1.62733	8.08933	2.31351	2.6e-05	0.000236745	HSD11B2	XP_038041291.1 corticosteroid 11-beta-dehydrogenase isozyme 2 [Anas platyrhynchos]
MSTRG.11372	1.02767	9.52067	3.21169	2.6e-05	0.000236745	--	EOA94108.1 taxid=8839 hypothetical protein Anapl_17196 [Anas platyrhynchos]
ENSAPLG00020008542	76.579	35.8583	-1.09464	2.64e-05	0.000240349	ANGEL2	XP_027309509.2 protein angel homolog 2 isoform X1 [Anas platyrhynchos]
ENSAPLG00020013004	17.418	39.4107	1.17801	2.66e-05	0.000241723	UCKL1	XP_031445377.1 uridine-cytidine kinase-like 1 isoform X3 [Phasianus colchicus]
ENSAPLG00020012862	25.4013	9.035	-1.49131	2.67e-05	0.000242886	ALDH6A1	XP_040413876.1 methylmalonate-semialdehyde dehydrogenase [acylating], mitochondrial [Cygnus olor]
ENSAPLG00020004562	72.0553	27.86	-1.37091	2.68e-05	0.000243449	BLOC1S6	XP_032051109.1 biogenesis of lysosome-related organelles complex 1 subunit 6 [Aythya fuligula]
ENSAPLG00020006951	27.6333	12.2843	-1.16959	2.69e-05	0.000244655	ZBTB10	XP_027308197.1 zinc finger and BTB domain-containing protein 10 isoform X1 [Anas platyrhynchos]
ENSAPLG00020001344	33.091	11.473	-1.5282	2.7e-05	0.000245338	MALSU1	XP_032036543.1 mitochondrial assembly of ribosomal large subunit protein 1, partial [Aythya fuligula]
ENSAPLG00020014938	30.4353	73.4613	1.27124	2.73e-05	0.000247701	LPXN	XP_027313943.2 leupaxin [Anas platyrhynchos]
ENSAPLG00020012404	0.833667	5.86667	2.815	2.73e-05	0.000247714	ENC1	XP_005029143.1 ectoderm-neural cortex protein 1-like [Anas platyrhynchos]
ENSAPLG00020009950	1.842	5.48533	1.57431	2.75e-05	0.000249192	ADGRV1	XP_038026809.1 adhesion G-protein coupled receptor V1 isoform X2 [Anas platyrhynchos]
ENSAPLG00020011057	2.38267	7.79367	1.70973	2.75e-05	0.000249496	PRKCE	XP_005009858.3 protein kinase C epsilon type isoform X1 [Anas platyrhynchos]
ENSAPLG00020015574	26.2067	59.624	1.18596	2.77e-05	0.000250645	NAV1	XP_038024206.1 LOW QUALITY PROTEIN: neuron navigator 1 [Anas platyrhynchos]
ENSAPLG00020010710	91.252	41.4353	-1.13899	2.77e-05	0.000250723	VPS26B	XP_005011319.1 vacuolar protein sorting-associated protein 26B [Anas platyrhynchos]
ENSAPLG00020012023	8.92267	27.365	1.61679	2.81e-05	0.000253595	Nedd9	XP_005017003.1 enhancer of filamentation 1 isoform X2 [Anas platyrhynchos]
ENSAPLG00020000286	14.2427	35.4907	1.31722	2.82e-05	0.00025468	MMAA	XP_038033970.1 methylmalonic aciduria type A protein, mitochondrial [Anas platyrhynchos]
ENSAPLG00020004619	68.2527	22.8123	-1.58107	2.85e-05	0.000257616	FZD4	XP_005027824.5 frizzled-4 [Anas platyrhynchos]
ENSAPLG00020013131	2.45433	11.9243	2.28051	2.86e-05	0.000258532	HBEGF	XP_027324363.1 proheparin-binding EGF-like growth factor [Anas platyrhynchos]
ENSAPLG00020002696	141.575	61.676	-1.19879	2.9e-05	0.000261975	Ints1	XP_027325041.1 integrator complex subunit 1 isoform X1 [Anas platyrhynchos]
ENSAPLG00020011777	33.668	81.3663	1.27305	2.95e-05	0.000265797	RNF138	XP_038030868.1 E3 ubiquitin-protein ligase RNF138 isoform X3 [Anas platyrhynchos]
ENSAPLG00020014863	0.18	1.74833	3.27991	2.96e-05	0.000266681	ANO8	XP_040393676.1 anoctamin-8 isoform X1 [Cygnus olor]
ENSAPLG00020015991	0.558	6.85133	3.61805	2.98e-05	0.000268227	FOSB	XP_038028816.1 protein fosB [Anas platyrhynchos]
MSTRG.10272	0.0286667	2.479	6.43424	2.99e-05	0.00026938	--	-
ENSAPLG00020015116	64.1367	24.381	-1.39539	3.01e-05	0.000270503	P2RY12	XP_005023709.1 P2Y purinoceptor 12 isoform X2 [Anas platyrhynchos]
MSTRG.10019	95.029	46.8743	-1.01957	3.04e-05	0.000273185	CPD	NP_001297311.1 taxid=8839 carboxypeptidase D precursor [Anas platyrhynchos]
ENSAPLG00020001173	0.537	6.11867	3.51022	3.05e-05	0.000273618	Nt5c1a	XP_035395859.1 cytosolic 5'-nucleotidase 1A-like [Cygnus atratus]
ENSAPLG00020004579	116.117	57.795	-1.00657	3.05e-05	0.000273874	PRPF8	XP_032056617.1 pre-mRNA-processing-splicing factor 8 [Aythya fuligula]
ENSAPLG00020008852	4.58067	14.7517	1.68725	3.06e-05	0.000273874	CBARP	XP_032059373.1 voltage-dependent calcium channel beta subunit-associated regulatory protein [Aythya fuligula]
ENSAPLG00020012824	77.0943	33.662	-1.1955	3.07e-05	0.000275002	STXBP5	XP_027310126.1 syntaxin-binding protein 5 isoform X1 [Anas platyrhynchos]
ENSAPLG00020012504	0.432667	4.415	3.35109	3.08e-05	0.000275434	FOXN4	XP_038043389.1 LOW QUALITY PROTEIN: forkhead box protein N4 [Anas platyrhynchos]
ENSAPLG00020016571	0.0393333	2.639	6.0681	3.09e-05	0.000276601	Clba1	XP_012960571.3 uncharacterized protein CLBA1 isoform X1 [Anas platyrhynchos]
MSTRG.19032	1.11967	3.89933	1.80016	3.11e-05	0.000278039	--	-
ENSAPLG00020017905	25.9973	8.72333	-1.57541	3.13e-05	0.000279932	CHST15	XP_038037379.1 carbohydrate sulfotransferase 15 [Anas platyrhynchos]
ENSAPLG00020017564	32.3327	12.783	-1.33877	3.15e-05	0.000280695	Arhgap11a	XP_038035667.1 rho GTPase-activating protein 11A isoform X2 [Anas platyrhynchos]
ENSAPLG00020008616	0.001	3.591	11.8102	3.16e-05	0.000281869	DRC7	XP_012955456.3 dynein regulatory complex subunit 7 isoform X1 [Anas platyrhynchos]
ENSAPLG00020009191	0.52	9.63533	4.21175	3.2e-05	0.000284994	DIRAS1	XP_027328292.1 GTP-binding protein Di-Ras1 [Anas platyrhynchos]
ENSAPLG00020000919	0.001	3.50567	11.7755	3.2e-05	0.000284994	SNCA	XP_027312255.2 alpha-synuclein [Anas platyrhynchos]
ENSAPLG00020018142	0.025	2.029	6.3427	3.22e-05	0.000286474	Krt23	XP_005030403.4 keratin, type I cytoskeletal 23 [Anas platyrhynchos]
ENSAPLG00020017845	92.7327	36.5727	-1.34231	3.23e-05	0.000287733	MLPH	XP_038038182.1 melanophilin isoform X4 [Anas platyrhynchos]
ENSAPLG00020007769	526.949	226.731	-1.21668	3.25e-05	0.000288911	Havcr1	XP_032052829.1 hepatitis A virus cellular receptor 1 homolog isoform X1 [Aythya fuligula]
ENSAPLG00020018030	0.001	1.48667	10.5379	3.28e-05	0.000291479	STON1	XP_038032327.1 stonin-1 [Anas platyrhynchos]
ENSAPLG00020017059	27.6437	8.877	-1.6388	3.32e-05	0.000294668	ST3GAL3	XP_027318213.1 CMP-N-acetylneuraminate-beta-1,4-galactoside alpha-2,3-sialyltransferase isoform X1 [Anas platyrhynchos]
ENSAPLG00020012607	2.696	10.8503	2.00885	3.32e-05	0.000294828	FHL5	XP_027310644.2 four and a half LIM domains protein 5 [Anas platyrhynchos]
ENSAPLG00020000296	0.001	1.70833	10.7384	3.33e-05	0.000295071	DRC1	EOA98054.1 UPF0407 protein C2orf39, partial [Anas platyrhynchos]
ENSAPLG00020011705	363.018	929.684	1.3567	3.33e-05	0.000295382	GIMAP7	XP_038030050.1 GTPase IMAP family member 8-like [Anas platyrhynchos]
ENSAPLG00020000691	52.1973	21.9133	-1.25217	3.35e-05	0.000296814	INTS9	XP_013039988.1 PREDICTED: integrator complex subunit 9 isoform X1 [Anser cygnoides domesticus]
MSTRG.12865	1.34433	10.7083	2.99377	3.35e-05	0.000296973	--	-
ENSAPLG00020000318	69.29	32.443	-1.09474	3.39e-05	0.000299765	CLCN3	XP_027312228.2 H(+)/Cl(-) exchange transporter 3 isoform X1 [Anas platyrhynchos]
ENSAPLG00020014276	0.944333	3.58	1.92259	3.4e-05	0.0003006	Synm	XP_027321519.1 synemin [Anas platyrhynchos]
ENSAPLG00020012480	35.347	16.2487	-1.12127	3.42e-05	0.000302313	ATP7A	EOB04555.1 Copper-transporting ATPase 1, partial [Anas platyrhynchos]
ENSAPLG00020012805	40.04	130.994	1.70999	3.43e-05	0.000303033	A2M	XP_005030047.1 ovostatin [Anas platyrhynchos]
ENSAPLG00020014507	0.001	4.024	11.9744	3.44e-05	0.000303588	PIAS2	EOA94375.1 E3 SUMO-protein ligase PIAS2 [Anas platyrhynchos]
ENSAPLG00020010357	89.4097	234.225	1.38939	3.46e-05	0.000305097	GLRX	XP_027302747.1 glutaredoxin-1 [Anas platyrhynchos]
ENSAPLG00020011906	1.15367	11.172	3.27559	3.47e-05	0.000305666	GIMAP2	XP_027308735.2 GTPase IMAP family member 1-like [Anas platyrhynchos]
ENSAPLG00020008211	21.3193	6.444	-1.72613	3.48e-05	0.000306627	Ptchd3	XP_027306392.2 patched domain-containing protein 3 [Anas platyrhynchos]
MSTRG.15855	4.78733	0.725667	-2.72184	3.51e-05	0.000308936	--	-
ENSAPLG00020017146	57.6247	21.8583	-1.3985	3.52e-05	0.000309434	CTNS	XP_032056805.1 cystinosin [Aythya fuligula]
ENSAPLG00020008263	141.888	56.3457	-1.33238	3.56e-05	0.000312463	HSDL2	XP_027302378.2 hydroxysteroid dehydrogenase-like protein 2 [Anas platyrhynchos]
ENSAPLG00020012899	0.061	3.56133	5.86746	3.56e-05	0.000312524	Sstr4	XP_038032271.1 somatostatin receptor type 4 [Anas platyrhynchos]
MSTRG.19321	0.077	3.26833	5.40755	3.57e-05	0.000313258	--	-
ENSAPLG00020006646	10.3053	32.2987	1.64808	3.61e-05	0.000316409	EML1	XP_021405351.1 echinoderm microtubule-associated protein-like 1 isoform X2 [Lonchura striata domestica]
ENSAPLG00020014071	125.852	56.5113	-1.15512	3.63e-05	0.000317842	SUCLG2	XP_027323316.2 succinate--CoA ligase [GDP-forming] subunit beta, mitochondrial [Anas platyrhynchos]
ENSAPLG00020006411	9.212	1.96167	-2.23143	3.64e-05	0.000318468	PNPLA2	XP_027305881.1 1-acylglycerol-3-phosphate O-acyltransferase Pnpla3 isoform X1 [Anas platyrhynchos]
ENSAPLG00020003443	0.0933333	1.742	4.22221	3.67e-05	0.000321406	CD163L1	XP_038028667.1 scavenger receptor cysteine-rich type 1 protein M130-like [Anas platyrhynchos]
MSTRG.1167	0.0353333	2.95233	6.38468	3.68e-05	0.000321987	--	XP_038029053.1 taxid=8839 potassium voltage-gated channel subfamily KQT member 1 isoform X11 [Anas platyrhynchos]
MSTRG.21184	0.001	3.071	11.5845	3.7e-05	0.000323236	--	-
ENSAPLG00020008337	34.552	14.5733	-1.24544	3.7e-05	0.000323236	FOCAD	XP_038026105.1 focadhesin isoform X1 [Anas platyrhynchos]
ENSAPLG00020016046	72.4467	33.7373	-1.10257	3.71e-05	0.000324483	Slc12a7	XP_040403336.1 solute carrier family 12 member 7 isoform X5 [Cygnus olor]
ENSAPLG00020015527	0.682667	3.98067	2.54376	3.72e-05	0.000324879	Cib2	XP_005027984.3 calcium and integrin-binding family member 2 isoform X1 [Anas platyrhynchos]
ENSAPLG00020004104	16.7877	6.19867	-1.43737	3.74e-05	0.000325968	pol	XP_010560827.1 PREDICTED: uncharacterized protein LOC104828670 [Haliaeetus leucocephalus]
ENSAPLG00020012985	21.8293	6.55267	-1.73611	3.74e-05	0.000326182	MTFR2	XP_038031960.1 mitochondrial fission regulator 2 isoform X2 [Anas platyrhynchos]
MSTRG.13399	0.001	4.28833	12.0662	3.74e-05	0.000326182	--	EOB02926.1 taxid=8839 hypothetical protein Anapl_08677 [Anas platyrhynchos]
MSTRG.289	0.001	1.555	10.6027	3.76e-05	0.000327037	--	-
ENSAPLG00020012284	3.916	0.814	-2.26628	3.77e-05	0.000328298	Scel	XP_038038253.1 sciellin [Anas platyrhynchos]
ENSAPLG00020014662	9.58867	2.65433	-1.85298	3.77e-05	0.000328298	POMGNT2	EOA92968.1 putative glycosyltransferase AGO61, partial [Anas platyrhynchos]
ENSAPLG00020007165	8.924	0.903333	-3.30436	3.82e-05	0.000331838	SYNGR1	XP_027306721.1 synaptogyrin-1 isoform X1 [Anas platyrhynchos]
ENSAPLG00020017996	47.3823	20.142	-1.23414	3.89e-05	0.000338007	FBXO7	XP_032063993.1 F-box only protein 7 isoform X1 [Aythya fuligula]
ENSAPLG00020015543	58.7627	27.4483	-1.09818	3.9e-05	0.000338274	Ipo9	XP_038024261.1 importin-9 [Anas platyrhynchos]
ENSAPLG00020017475	6.37433	1.275	-2.32178	3.91e-05	0.000339759	SGIP1	XP_032048000.1 SH3-containing GRB2-like protein 3-interacting protein 1 isoform X4 [Aythya fuligula]
ENSAPLG00020010654	1.76767	0.0443333	-5.31731	3.93e-05	0.000340876	Raly	XP_013044694.1 PREDICTED: RNA-binding protein Raly [Anser cygnoides domesticus]
ENSAPLG00020000381	0.335	5.95367	4.15155	3.96e-05	0.000343262	--	XP_027305736.2 zinc finger protein 239 [Anas platyrhynchos]
ENSAPLG00020001993	232.639	108.775	-1.09674	3.96e-05	0.000343347	ST13	XP_027306964.1 hsc70-interacting protein [Anas platyrhynchos]
ENSAPLG00020004780	20.417	8.15	-1.3249	3.98e-05	0.000344871	ARHGAP10	XP_027312477.1 rho GTPase-activating protein 10 isoform X1 [Anas platyrhynchos]
ENSAPLG00020000150	80.1093	32.5227	-1.30052	4.12e-05	0.000356573	CLPTM1L	XP_027307622.1 cleft lip and palate transmembrane protein 1-like protein [Anas platyrhynchos]
ENSAPLG00020005795	8.692	20.9413	1.26859	4.12e-05	0.000356603	CASD1	XP_027306604.2 N-acetylneuraminate 9-O-acetyltransferase isoform X1 [Anas platyrhynchos]
ENSAPLG00020015750	2.55767	9.73633	1.92855	4.27e-05	0.000369018	FKBP5	XP_027300496.2 peptidyl-prolyl cis-trans isomerase FKBP5 isoform X1 [Anas platyrhynchos]
ENSAPLG00020004153	4.033	1.16733	-1.78864	4.33e-05	0.000373674	PCNX2	XP_038032055.1 pecanex-like protein 2 isoform X1 [Anas platyrhynchos]
MSTRG.131	0.220667	2.482	3.49156	4.35e-05	0.000375543	--	XP_050564026.1 taxid=8868 uncharacterized protein LOC118249468 [Cygnus atratus]
MSTRG.9383	0.043	2.55633	5.8936	4.4e-05	0.000379051	--	-
ENSAPLG00020008093	61.6513	21.4703	-1.52179	4.41e-05	0.000379835	Acot13	XP_032037006.1 acyl-coenzyme A thioesterase 13, partial [Aythya fuligula]
ENSAPLG00020002018	11.2763	4.31933	-1.38442	4.42e-05	0.000380602	FAN1	EOA97126.1 Coiled-coil domain-containing protein MTMR15, partial [Anas platyrhynchos]
ENSAPLG00020013148	188.484	83.9697	-1.1665	4.43e-05	0.000381015	APLP2	XP_032057917.1 amyloid-like protein 2 isoform X6 [Aythya fuligula]
ENSAPLG00020016882	0.173667	12.359	6.1531	4.43e-05	0.000381207	--	ARR31397.1 T-cell receptor gamma chain V domain, partial [Anas platyrhynchos]
ENSAPLG00020014103	66.3647	32.2303	-1.042	4.46e-05	0.000383114	AKAP1	XP_021129051.2 A-kinase anchor protein 1, mitochondrial [Anas platyrhynchos]
ENSAPLG00020017601	13.6753	5.13567	-1.41295	4.46e-05	0.000383163	DPH6	XP_027314046.2 diphthine--ammonia ligase isoform X1 [Anas platyrhynchos]
MSTRG.1021	4.86467	12.035	1.30682	4.52e-05	0.000388054	PARP12	XP_012956850.2 taxid=8839 protein mono-ADP-ribosyltransferase PARP12 isoform X1 [Anas platyrhynchos]
ENSAPLG00020002128	0.0366667	2.667	6.1846	4.53e-05	0.000388621	Neu2	XP_027320289.1 sialidase-2 isoform X1 [Anas platyrhynchos]
ENSAPLG00020004493	64.434	30.6883	-1.07013	4.54e-05	0.000389101	Dock4	XP_038041127.1 dedicator of cytokinesis protein 4 isoform X1 [Anas platyrhynchos]
ENSAPLG00020012443	0.439333	3.00867	2.77574	4.55e-05	0.000390552	Uroc1	XP_005025164.3 urocanate hydratase isoform X1 [Anas platyrhynchos]
ENSAPLG00020003051	9.193	2.09667	-2.13244	4.59e-05	0.000393185	FDX1	XP_038040571.1 adrenodoxin-like [Anas platyrhynchos]
ENSAPLG00020005666	8.63433	29.5977	1.77733	4.7e-05	0.000402301	--	XP_005014375.3 platelet glycoprotein V [Anas platyrhynchos]
ENSAPLG00020015497	91.7327	43.897	-1.06331	4.73e-05	0.000404656	DCAF6	XP_035396871.1 DDB1- and CUL4-associated factor 6 isoform X5 [Cygnus atratus]
ENSAPLG00020005101	131.694	65.321	-1.01157	4.75e-05	0.000405798	PIK3R1	XP_038026104.1 phosphatidylinositol 3-kinase regulatory subunit alpha isoform X1 [Anas platyrhynchos]
ENSAPLG00020010443	1.178	7.361	2.64356	4.76e-05	0.000406966	BMP2	XP_027309108.1 bone morphogenetic protein 2 [Anas platyrhynchos]
ENSAPLG00020005134	0.529	3.471	2.71401	4.78e-05	0.000407626	SLCO3A1	XP_038040862.1 solute carrier organic anion transporter family member 3A1 [Anas platyrhynchos]
MSTRG.16028	3.20367	0.129	-4.63428	4.8e-05	0.000409098	--	-
ENSAPLG00020004876	7.35633	18.372	1.32045	4.85e-05	0.000413175	SP2	XP_032058556.1 transcription factor Sp2 [Aythya fuligula]
ENSAPLG00020015079	22.3347	7.76567	-1.5241	4.85e-05	0.000413403	NEDD1	XP_027308161.1 protein NEDD1 [Anas platyrhynchos]
MSTRG.1381	0.204	5.37467	4.71953	4.85e-05	0.000413403	--	-
MSTRG.12826	0.175667	2.75567	3.97149	4.86e-05	0.000413564	--	XP_038033286.1 taxid=8839 uncharacterized protein LOC119716509 [Anas platyrhynchos]
ENSAPLG00020015098	10.0103	1.41733	-2.82024	4.88e-05	0.000414786	GABRD	EOB07555.1 Gamma-aminobutyric acid receptor subunit delta, partial [Anas platyrhynchos]
ENSAPLG00020012732	1.32067	6.39167	2.27493	4.92e-05	0.000418402	KLRF1	XP_005012719.1 killer cell lectin-like receptor subfamily F member 1 isoform X1 [Anas platyrhynchos]
ENSAPLG00020000014	5.61433	16.6987	1.57255	4.95e-05	0.000420776	Pfkfb3	XP_035189951.1 6-phosphofructo-2-kinase/fructose-2,6-bisphosphatase 3 isoform X3 [Oxyura jamaicensis]
ENSAPLG00020017463	0.759	4.24733	2.48439	4.98e-05	0.000423076	DNAJC6	EOA93100.1 Putative tyrosine-protein phosphatase auxilin, partial [Anas platyrhynchos]
ENSAPLG00020001293	3.35133	10.243	1.61183	5.01e-05	0.00042508	TNFRSF11B	XP_005017766.3 tumor necrosis factor receptor superfamily member 11B [Anas platyrhynchos]
ENSAPLG00020009424	19.0333	0.703	-4.75886	5.02e-05	0.000426108	Olfml1	XP_005014037.1 olfactomedin-like protein 1 [Anas platyrhynchos]
ENSAPLG00020010445	10.414	27.4553	1.39856	5.04e-05	0.000427131	TP53RK	XP_027329012.1 EKC/KEOPS complex subunit TP53RK [Anas platyrhynchos]
ENSAPLG00020006494	303.915	695.268	1.1939	5.04e-05	0.000427131	CD44	XP_038035720.1 CD44 antigen isoform X3 [Anas platyrhynchos]
ENSAPLG00020005470	25.3657	52.2677	1.04304	5.05e-05	0.000427231	FLRT3	PKU33384.1 leucine-rich repeat transmembrane protein flrt3 [Limosa lapponica baueri]
ENSAPLG00020013740	28.8177	12.0233	-1.26112	5.08e-05	0.000429436	MBTD1	XP_027327507.1 MBT domain-containing protein 1 isoform X6 [Anas platyrhynchos]
ENSAPLG00020013639	248.177	114.627	-1.11442	5.1e-05	0.000431495	IGF2R	XP_027309114.2 LOW QUALITY PROTEIN: cation-independent mannose-6-phosphate receptor [Anas platyrhynchos]
ENSAPLG00020008225	25.1183	68.127	1.43949	5.11e-05	0.000431677	SESN1	XP_038031822.1 sestrin-1 isoform X4 [Anas platyrhynchos]
ENSAPLG00020001526	114.083	38.4753	-1.56808	5.15e-05	0.000434871	TRAM2	EOB05379.1 Translocation-associated membrane protein 2, partial [Anas platyrhynchos]
ENSAPLG00020005652	45.2077	15.3143	-1.56168	5.19e-05	0.000437681	RBKS	XP_027309856.1 ribokinase isoform X5 [Anas platyrhynchos]
ENSAPLG00020001291	15.9023	44.877	1.49674	5.24e-05	0.000442281	Fam107b	KAF1418096.1 hypothetical protein FQV22_0005146, partial [Spheniscus magellanicus]
ENSAPLG00020002888	69.958	142.384	1.02522	5.29e-05	0.000445877	CALCOCO2	XP_027301293.1 calcium-binding and coiled-coil domain-containing protein 2 [Anas platyrhynchos]
ENSAPLG00020009429	36.236	79.003	1.12448	5.33e-05	0.000448762	JAK2	XP_027302951.2 tyrosine-protein kinase JAK2 [Anas platyrhynchos]
ENSAPLG00020004871	49.148	21.9647	-1.16195	5.34e-05	0.000449783	PYCR2	XP_027327205.1 pyrroline-5-carboxylate reductase 1, mitochondrial [Anas platyrhynchos]
ENSAPLG00020006985	37.359	13.4103	-1.47811	5.36e-05	0.000451174	B4GALT4	EOB02982.1 Beta-1,4-galactosyltransferase 4, partial [Anas platyrhynchos]
ENSAPLG00020018322	128.464	60.4063	-1.08859	5.38e-05	0.000452467	MCM3AP	XP_038037878.1 germinal-center associated nuclear protein [Anas platyrhynchos]
ENSAPLG00020002180	1.32733	6.90067	2.37821	5.4e-05	0.000454025	ABCG4	XP_027299952.1 LOW QUALITY PROTEIN: ATP-binding cassette sub-family G member 4 [Anas platyrhynchos]
ENSAPLG00020003583	0.151333	3.569	4.55972	5.41e-05	0.000454519	NCALD	XP_039382122.1 neurocalcin-delta isoform X1 [Mauremys reevesii]
ENSAPLG00020016044	2.84933	11.1147	1.96377	5.43e-05	0.000455706	NFATC2	XP_040431466.1 nuclear factor of activated T-cells, cytoplasmic 2 isoform X3 [Cygnus olor]
ENSAPLG00020011424	0.687333	7.95933	3.53357	5.44e-05	0.000456458	IL20	XP_038024331.1 interleukin-20 [Anas platyrhynchos]
ENSAPLG00020006884	31.4157	70.8137	1.17254	5.58e-05	0.00046747	DDIT4	XP_027316046.1 DNA damage-inducible transcript 4 protein [Anas platyrhynchos]
ENSAPLG00020004194	16.2253	39.1393	1.27037	5.62e-05	0.000471108	Tmem140	XP_038040868.1 transmembrane protein 140 isoform X2 [Anas platyrhynchos]
ENSAPLG00020000116	40.0597	103.699	1.37218	5.67e-05	0.000474362	HMGB2	XP_027312211.2 high mobility group protein B2 [Anas platyrhynchos]
ENSAPLG00020001942	144.004	64.8147	-1.15172	5.68e-05	0.00047537	rnf149	XP_035413887.1 E3 ubiquitin-protein ligase RNF149 isoform X1 [Cygnus atratus]
ENSAPLG00020004558	0.188667	12.072	5.99968	5.69e-05	0.000475716	Plac8	EOB05765.1 Placenta-specific gene 8 protein, partial [Anas platyrhynchos]
ENSAPLG00020001354	0.141333	2.09967	3.89299	5.76e-05	0.000481094	Kcnq1	XP_027314307.1 potassium voltage-gated channel subfamily KQT member 1 isoform X1 [Anas platyrhynchos]
ENSAPLG00020014855	0.001	0.725333	9.5025	5.77e-05	0.000481385	PDE4D	XP_027328177.2 cAMP-specific 3',5'-cyclic phosphodiesterase 4C isoform X1 [Anas platyrhynchos]
ENSAPLG00020015391	32.531	11.7057	-1.47461	5.77e-05	0.000481385	ME2	XP_038026049.1 NAD-dependent malic enzyme, mitochondrial [Anas platyrhynchos]
ENSAPLG00020007981	17.4167	43.6677	1.3261	5.77e-05	0.000481397	CASP3	XP_005030551.1 caspase-3 [Anas platyrhynchos]
ENSAPLG00020004764	0.118667	1.434	3.59506	5.77e-05	0.000481397	FLT3	XP_027325495.2 receptor-type tyrosine-protein kinase FLT3 isoform X3 [Anas platyrhynchos]
ENSAPLG00020008184	331.788	150.866	-1.13699	5.85e-05	0.000487188	UGCG	XP_010211042.1 PREDICTED: ceramide glucosyltransferase [Tinamus guttatus]
ENSAPLG00020009535	31.867	13.2967	-1.261	5.85e-05	0.000487188	Mccc2	XP_032061904.1 methylcrotonoyl-CoA carboxylase beta chain, mitochondrial [Aythya fuligula]
ENSAPLG00020016854	0.022	1.08	5.61738	5.92e-05	0.000492432	ITGA9	XP_027307184.1 integrin alpha-9 isoform X1 [Anas platyrhynchos]
ENSAPLG00020010025	117.008	240.037	1.03665	5.93e-05	0.000493028	TRAFD1	XP_038043234.1 TRAF-type zinc finger domain-containing protein 1 [Anas platyrhynchos]
ENSAPLG00020010372	44.411	20.1813	-1.1379	5.94e-05	0.000493947	CBL	XP_027300206.2 E3 ubiquitin-protein ligase CBL [Anas platyrhynchos]
ENSAPLG00020009335	15.4287	4.26133	-1.85624	6.05e-05	0.000502989	TCP11L1	XP_032044408.1 T-complex protein 11-like protein 1 [Aythya fuligula]
ENSAPLG00020003484	66.6923	29.8893	-1.15789	6.06e-05	0.000503192	Kiaa0319l	EOA97153.1 Uncharacterized protein KIAA0319-like, partial [Anas platyrhynchos]
ENSAPLG00020001534	49.5847	18.195	-1.44635	6.06e-05	0.000503216	SLC25A15	XP_027326734.1 mitochondrial ornithine transporter 1 [Anas platyrhynchos]
ENSAPLG00020003052	13.2627	5.208	-1.34857	6.08e-05	0.000504103	PGM2L1	XP_027321946.2 LOW QUALITY PROTEIN: glucose 1,6-bisphosphate synthase [Anas platyrhynchos]
ENSAPLG00020007808	76.2227	36.341	-1.06862	6.11e-05	0.000506822	PMF1	XP_027300328.2 polyamine-modulated factor 1 [Anas platyrhynchos]
ENSAPLG00020018384	1119.83	523.696	-1.09648	6.14e-05	0.000508604	ITGB2	XP_027317311.1 integrin beta-2 [Anas platyrhynchos]
ENSAPLG00020011938	28.2813	13.0337	-1.11761	6.17e-05	0.000510874	SPG11	XP_027321426.2 LOW QUALITY PROTEIN: spatacsin [Anas platyrhynchos]
ENSAPLG00020014594	620.849	289.104	-1.10265	6.22e-05	0.000514395	Nr1h3	XP_005028767.1 oxysterols receptor LXR-alpha isoform X1 [Anas platyrhynchos]
ENSAPLG00020002690	12.7473	4.56933	-1.48014	6.35e-05	0.00052443	MAML3	XP_027312532.1 mastermind-like protein 3 isoform X1 [Anas platyrhynchos]
ENSAPLG00020000856	67.481	33.2393	-1.02159	6.35e-05	0.00052443	Insig2	XP_013041946.1 PREDICTED: insulin-induced gene 2 protein isoform X1 [Anser cygnoides domesticus]
ENSAPLG00020002722	0.001	0.810333	9.66237	6.38e-05	0.000526783	CD163L1	XP_032060934.1 antigen WC1.1-like [Aythya fuligula]
ENSAPLG00020007432	0.295	2.33033	2.98175	6.53e-05	0.000538946	scnn1a	XP_005008876.2 amiloride-sensitive sodium channel subunit delta [Anas platyrhynchos]
ENSAPLG00020009777	2.11333	7.492	1.82583	6.58e-05	0.000542188	WDR60	XP_032038651.1 WD repeat-containing protein 60 isoform X2 [Aythya fuligula]
ENSAPLG00020015174	2.16033	0.174333	-3.63133	6.58e-05	0.000542415	SLC16A9	XP_012951273.3 monocarboxylate transporter 9 [Anas platyrhynchos]
ENSAPLG00020003497	24.255	66.4597	1.4542	6.6e-05	0.000543311	KLF4	KAF6125004.1 Kruppel like factor 4 [Phyllostomus discolor]
ENSAPLG00020015590	94.9027	192.841	1.02289	6.63e-05	0.000545385	--	XP_005017694.2 T-lymphocyte activation antigen CD80 [Anas platyrhynchos]
ENSAPLG00020007945	12.552	4.08767	-1.61857	6.64e-05	0.00054639	PTPRS	XP_035423642.1 receptor-type tyrosine-protein phosphatase S isoform X2 [Cygnus atratus]
ENSAPLG00020012367	0.001	0.446667	8.80305	6.66e-05	0.000547159	FCGBP	XP_038028057.1 IgGFc-binding protein isoform X1 [Anas platyrhynchos]
ENSAPLG00020001726	5.77933	16.0037	1.46943	6.67e-05	0.000548441	PTP4A3	XP_003205356.1 protein tyrosine phosphatase type IVA 3 [Meleagris gallopavo]
ENSAPLG00020014977	82.1557	38.86	-1.08007	6.69e-05	0.000549758	GAS2L3	XP_012959666.3 GAS2-like protein 3 [Anas platyrhynchos]
ENSAPLG00020002837	13.339	5.41767	-1.29991	6.71e-05	0.0005506	HEPH	XP_038040603.1 LOW QUALITY PROTEIN: hephaestin [Anas platyrhynchos]
ENSAPLG00020006203	56.4817	24.016	-1.23379	6.76e-05	0.000554629	PRMT3	XP_038035847.1 LOW QUALITY PROTEIN: protein arginine N-methyltransferase 3 [Anas platyrhynchos]
ENSAPLG00020001553	62.291	29.778	-1.06478	6.76e-05	0.000554629	MCM3	XP_027311170.2 DNA replication licensing factor MCM3 [Anas platyrhynchos]
ENSAPLG00020016957	2.33933	8.958	1.93708	6.77e-05	0.000554717	METTL4	XP_005009442.3 N(6)-adenine-specific methyltransferase METTL4 isoform X1 [Anas platyrhynchos]
MSTRG.17789	18.862	8.64367	-1.12577	6.8e-05	0.00055687	HIPK3	XP_005022097.2 taxid=8839 homeodomain-interacting protein kinase 3 isoform X2 [Anas platyrhynchos]
ENSAPLG00020014797	17.1147	50.131	1.55047	6.83e-05	0.000559013	CMTM7	XP_027306904.2 CKLF-like MARVEL transmembrane domain-containing protein 7 [Anas platyrhynchos]
ENSAPLG00020009676	219.597	100.48	-1.12794	6.86e-05	0.000560731	ANP32E	XP_027300276.1 acidic leucine-rich nuclear phosphoprotein 32 family member E isoform X2 [Anas platyrhynchos]
ENSAPLG00020013802	42.34	17.1953	-1.3	6.9e-05	0.000563847	PCMTD1	NP_001026190.1 protein-L-isoaspartate O-methyltransferase domain-containing protein 1 [Gallus gallus]
ENSAPLG00020011382	0.001	1.84867	10.8523	6.91e-05	0.000564099	snai1	XP_027328745.1 zinc finger protein SNAI1 [Anas platyrhynchos]
ENSAPLG00020018248	3.591	13.5063	1.91118	6.97e-05	0.000568333	AQP3	XP_027302380.1 aquaporin-3 isoform X2 [Anas platyrhynchos]
ENSAPLG00020005568	20.549	41.5237	1.01487	6.97e-05	0.000568347	RGS14	XP_032052742.1 regulator of G-protein signaling 14 [Aythya fuligula]
ENSAPLG00020017287	2.41167	8.33433	1.78904	6.98e-05	0.000568559	Cysltr1	XP_040428596.1 cysteinyl leukotriene receptor 1 isoform X1 [Cygnus olor]
ENSAPLG00020010370	29.6323	13.655	-1.11774	6.99e-05	0.000569398	ELL2	XP_038026647.1 RNA polymerase II elongation factor ELL2 isoform X2 [Anas platyrhynchos]
ENSAPLG00020016636	12.1747	30.0983	1.3058	7e-05	0.000569494	TLR7	QRG28802.1 toll-like receptor 7 [Anas platyrhynchos]
ENSAPLG00020005542	20.6023	48.1603	1.22504	7e-05	0.000569494	DCP1B	XP_005010274.2 mRNA-decapping enzyme 1B [Anas platyrhynchos]
ENSAPLG00020004162	107.092	215.654	1.00987	7.01e-05	0.000569745	Hexim1	XP_027301097.1 protein HEXIM1 [Anas platyrhynchos]
ENSAPLG00020009470	0.001	2.02033	10.9804	7.04e-05	0.000571546	GDNF	XP_032062458.1 glial cell line-derived neurotrophic factor isoform X1 [Aythya fuligula]
MSTRG.3326	13.1817	38.1953	1.53486	7.09e-05	0.000575502	--	KAI6077344.1 taxid=8832 Coiled-coil domain-containing glutamate-rich protein 1-like protein [Aix galericulata]
ENSAPLG00020018091	21.0463	9.62833	-1.12821	7.1e-05	0.00057601	H6PD	XP_005015486.3 GDH/6PGL endoplasmic bifunctional protein [Anas platyrhynchos]
ENSAPLG00020016009	8.87367	20.0687	1.17734	7.15e-05	0.000580251	HIVEP1	XP_038029463.1 zinc finger protein 40 isoform X2 [Anas platyrhynchos]
ENSAPLG00020007788	784.7	386.204	-1.02278	7.18e-05	0.000581651	CNDP2	XP_027307697.1 cytosolic non-specific dipeptidase [Anas platyrhynchos]
ENSAPLG00020014666	463.956	219.25	-1.08141	7.18e-05	0.000581668	Glud1	XP_027315810.1 glutamate dehydrogenase 1, mitochondrial [Anas platyrhynchos]
ENSAPLG00020014169	27.261	9.192	-1.56839	7.21e-05	0.000583611	pol	XP_014810274.1 PREDICTED: uncharacterized protein LOC106895380 [Calidris pugnax]
ENSAPLG00020000250	85.8663	40.9983	-1.06653	7.26e-05	0.000587697	PTPRJ	XP_038035864.1 receptor-type tyrosine-protein phosphatase eta isoform X2 [Anas platyrhynchos]
ENSAPLG00020012422	31.229	96.9733	1.6347	7.29e-05	0.000589364	G0s2	XP_035202785.1 G0/G1 switch protein 2 [Oxyura jamaicensis]
ENSAPLG00020004580	59.5973	25.7793	-1.20903	7.3e-05	0.000590095	IPO11	XP_027302045.2 importin-11 isoform X1 [Anas platyrhynchos]
ENSAPLG00020004857	11.4963	3.62733	-1.66419	7.34e-05	0.000593176	MACROH2A2	XP_009673994.1 PREDICTED: core histone macro-H2A.2 [Struthio camelus australis]
ENSAPLG00020000218	0.946	3.93433	2.05621	7.35e-05	0.000593463	RUNX2	XP_038032147.1 runt-related transcription factor 2 isoform X1 [Anas platyrhynchos]
ENSAPLG00020012225	6.113	14.5137	1.24746	7.36e-05	0.000594345	SGSM2	XP_027327758.2 small G protein signaling modulator 2 isoform X2 [Anas platyrhynchos]
ENSAPLG00020004673	40.7337	19.0153	-1.09906	7.46e-05	0.000601549	tbc1d24	XP_027324767.1 TBC1 domain family member 24 isoform X1 [Anas platyrhynchos]
ENSAPLG00020004470	577.339	1260.47	1.12648	7.46e-05	0.000601549	ACTN1	XP_032840462.2 alpha-actinin-1 isoform X2 [Tyto alba]
ENSAPLG00020007709	1.23133	5.33767	2.11599	7.48e-05	0.00060307	EGR3	XP_032060035.1 early growth response protein 3 [Aythya fuligula]
ENSAPLG00020009851	0.0566667	2.014	5.15142	7.55e-05	0.000608417	CDH11	EOB01024.1 Cadherin-11, partial [Anas platyrhynchos]
MSTRG.9771	10.1367	33.0937	1.70697	7.56e-05	0.000608695	--	-
ENSAPLG00020005048	28.5227	64.968	1.18762	7.62e-05	0.000613418	Dusp10	XP_027308906.2 dual specificity protein phosphatase 10 [Anas platyrhynchos]
ENSAPLG00020016256	14.7137	5.11733	-1.52369	7.76e-05	0.000623931	C15orf39	XP_027322068.2 LOW QUALITY PROTEIN: uncharacterized protein C15orf39 homolog [Anas platyrhynchos]
ENSAPLG00020009626	5.62267	16.2807	1.53383	7.81e-05	0.000627287	LCA5	XP_027310759.1 lebercilin [Anas platyrhynchos]
ENSAPLG00020000614	0.001	3.12667	11.6104	7.82e-05	0.000628395	OR4S2	XP_005028457.3 olfactory receptor 4S2 [Anas platyrhynchos]
ENSAPLG00020004015	26.81	6.78367	-1.98263	7.83e-05	0.000628468	SESN3	XP_032036500.1 sestrin-3 [Aythya fuligula]
ENSAPLG00020017676	5.721	17.962	1.65061	7.88e-05	0.000632043	--	XP_038035077.1 malignant fibrous histiocytoma-amplified sequence 1 homolog isoform X1 [Anas platyrhynchos]
ENSAPLG00020015368	18.6163	8.53267	-1.1255	7.9e-05	0.000633727	DNMT3A	XP_035424199.1 DNA (cytosine-5)-methyltransferase 3A isoform X3 [Cygnus atratus]
ENSAPLG00020012803	30.0213	13.811	-1.12017	7.91e-05	0.000634318	Abcd4	XP_038036206.1 lysosomal cobalamin transporter ABCD4 isoform X2 [Anas platyrhynchos]
ENSAPLG00020013627	0.230333	2.39667	3.37923	8.01e-05	0.000641599	ARHGAP40	XP_005011739.2 rho GTPase-activating protein 40 isoform X3 [Anas platyrhynchos]
ENSAPLG00020012124	0.979	5.047	2.36605	8.02e-05	0.000641892	Cnrip1	XP_005025222.2 CB1 cannabinoid receptor-interacting protein 1 [Anas platyrhynchos]
ENSAPLG00020009681	0.001	0.940667	9.87754	8.07e-05	0.000645418	CD163L1	XP_038028667.1 scavenger receptor cysteine-rich type 1 protein M130-like [Anas platyrhynchos]
ENSAPLG00020014081	5.81267	17.4027	1.58204	8.08e-05	0.000646321	EOGT	XP_038042009.1 EGF domain-specific O-linked N-acetylglucosamine transferase [Anas platyrhynchos]
ENSAPLG00020006173	0.001	2.13867	11.0625	8.1e-05	0.000647126	HS3ST1	XP_027313183.1 heparan sulfate glucosamine 3-O-sulfotransferase 1 [Anas platyrhynchos]
ENSAPLG00020018373	164.648	77.7077	-1.08325	8.18e-05	0.000653247	POFUT2	XP_027316794.1 GDP-fucose protein O-fucosyltransferase 2 [Anas platyrhynchos]
ENSAPLG00020001424	2.87633	0.001	-11.49	8.21e-05	0.000655705	VSNL1	XP_030346923.1 visinin-like protein 1 isoform X1 [Strigops habroptila]
ENSAPLG00020003784	5.83567	0.444	-3.71627	8.31e-05	0.000662469	Dnase1l3	XP_027323185.1 deoxyribonuclease gamma [Anas platyrhynchos]
ENSAPLG00020008147	143.968	68.219	-1.07751	8.38e-05	0.000667763	Mfsd14a	XP_027328334.1 hippocampus abundant transcript 1 protein [Anas platyrhynchos]
ENSAPLG00020005004	41.0567	18.475	-1.15204	8.41e-05	0.0006703	MINPP1	XP_027316006.2 multiple inositol polyphosphate phosphatase 1 [Anas platyrhynchos]
ENSAPLG00020012146	38.9247	17.6253	-1.14303	8.48e-05	0.00067492	ACR	XP_027317843.2 acrosin isoform X1 [Anas platyrhynchos]
MSTRG.20579	0.001	1.98433	10.9544	8.48e-05	0.00067492	--	KAF1487344.1 taxid=2517240 hypothetical protein FQV17_0008579, partial [Megadyptes antipodes antipodes]
ENSAPLG00020002521	15.467	6.93667	-1.15688	8.52e-05	0.000678079	DMXL2	XP_038040775.1 dmX-like protein 2 isoform X1 [Anas platyrhynchos]
ENSAPLG00020013813	116.862	52.7713	-1.14698	8.59e-05	0.000683228	LFNG	XP_021267410.1 beta-1,3-N-acetylglucosaminyltransferase lunatic fringe [Numida meleagris]
ENSAPLG00020015307	1.212	3.97933	1.71514	8.65e-05	0.000687345	MPZL3	XP_027299979.1 myelin protein zero-like protein 3 isoform X1 [Anas platyrhynchos]
ENSAPLG00020005164	285.207	138.293	-1.04428	8.66e-05	0.000688016	STK17A	XP_012950665.4 serine/threonine-protein kinase 17A isoform X1 [Anas platyrhynchos]
ENSAPLG00020017466	3.744	13.4487	1.84481	8.69e-05	0.000690145	PIK3R3	XP_032047900.1 phosphatidylinositol 3-kinase regulatory subunit gamma isoform X2 [Aythya fuligula]
ENSAPLG00020010363	2.58867	10.6403	2.03926	8.8e-05	0.000698502	Nqo2	XP_038030768.1 ribosyldihydronicotinamide dehydrogenase [quinone] isoform X3 [Anas platyrhynchos]
ENSAPLG00020011810	21.0163	9.386	-1.16293	8.87e-05	0.000703722	KYAT1	XP_032056463.1 kynurenine--oxoglutarate transaminase 1 [Aythya fuligula]
ENSAPLG00020005997	0.001	2.22967	11.1226	8.89e-05	0.000705	Opn3	XP_012958902.3 opsin-3 [Anas platyrhynchos]
ENSAPLG00020015190	48.9043	22.9627	-1.09067	8.91e-05	0.000705868	EXOC4	XP_032041013.1 exocyst complex component 4 [Aythya fuligula]
MSTRG.20872	13.4467	5.023	-1.42063	8.94e-05	0.000707697	--	XP_038025345.1 taxid=8839 uncharacterized protein LOC113841927 isoform X7 [Anas platyrhynchos]
ENSAPLG00020006902	56.8557	131.76	1.21254	8.95e-05	0.000708157	--	XP_038039355.1 uncharacterized protein LOC119717691 [Anas platyrhynchos]
ENSAPLG00020014843	11.3603	32.5037	1.5166	9.02e-05	0.00071324	STAT4	XP_035428309.1 signal transducer and activator of transcription 4 [Cygnus atratus]
ENSAPLG00020009270	1.394	8.69767	2.6414	9.09e-05	0.000718118	PRRG4	XP_005022092.1 transmembrane gamma-carboxyglutamic acid protein 4 [Anas platyrhynchos]
MSTRG.2449	6.21033	1.45867	-2.09002	9.09e-05	0.000718118	--	-
ENSAPLG00020003306	41.6577	17.751	-1.23068	9.14e-05	0.000722074	ACOT1	EOA99756.1 Acyl-coenzyme A thioesterase 2, mitochondrial, partial [Anas platyrhynchos]
ENSAPLG00020004449	78.8563	39.183	-1.009	9.15e-05	0.000722233	KIF2A	XP_032061358.1 kinesin-like protein KIF2A isoform X1 [Aythya fuligula]
ENSAPLG00020010828	25.3077	66.494	1.39365	9.17e-05	0.000723754	RASSF5	EOB07035.1 Ras association domain-containing family protein 5, partial [Anas platyrhynchos]
ENSAPLG00020016543	5.07333	17.998	1.82683	9.22e-05	0.000727004	CYP2J2	XP_005022956.1 LOW QUALITY PROTEIN: cytochrome P450 2J2 [Anas platyrhynchos]
ENSAPLG00020003539	1.45033	5.25033	1.85602	9.29e-05	0.000732431	ZNF462	XP_038025894.1 zinc finger protein 462 isoform X1 [Anas platyrhynchos]
ENSAPLG00020011626	16.6393	44.3417	1.41407	9.33e-05	0.00073445	Cd55b	XP_038024478.1 complement receptor type 1 [Anas platyrhynchos]
ENSAPLG00020010800	94.6283	29.9907	-1.65776	9.36e-05	0.000736556	PLPP5	XP_032059916.1 phospholipid phosphatase 5 [Aythya fuligula]
ENSAPLG00020003213	5.42433	24.8253	2.1943	9.39e-05	0.000738124	HLA-DRB4	XP_032061025.1 class II histocompatibility antigen, B-L beta chain-like [Aythya fuligula]
ENSAPLG00020016434	88.1467	36.4973	-1.27211	9.42e-05	0.000740347	NIPSNAP2	XP_027328084.1 protein NipSnap homolog 2 [Anas platyrhynchos]
ENSAPLG00020007444	34.159	14.0357	-1.28317	9.5e-05	0.000746596	TMEM94	XP_032055589.1 transmembrane protein 94 isoform X1 [Aythya fuligula]
ENSAPLG00020017218	4.65367	0.759667	-2.61493	9.54e-05	0.000749016	STK32C	XP_032046898.1 serine/threonine-protein kinase 32C [Aythya fuligula]
MSTRG.77	0.577667	2.63433	2.18913	9.68e-05	0.000759208	--	EOB08714.1 taxid=8839 hypothetical protein Anapl_10451 [Anas platyrhynchos]
MSTRG.5891	0.0766667	1.60767	4.39023	9.71e-05	0.000760815	--	-
ENSAPLG00020000765	6.19033	14.962	1.27321	9.73e-05	0.000762457	Usp6nl	XP_038035562.1 USP6 N-terminal-like protein [Anas platyrhynchos]
ENSAPLG00020010510	0.594667	3.887	2.7085	9.76e-05	0.000764047	Hgfac	XP_005016246.2 hepatocyte growth factor activator [Anas platyrhynchos]
ENSAPLG00020014960	0.915	3.758	2.03812	9.89e-05	0.000774179	ZNF521	XP_038029810.1 zinc finger protein 521 isoform X4 [Anas platyrhynchos]
ENSAPLG00020013564	6.99133	1.83467	-1.93005	9.91e-05	0.000775162	WNT8B	XP_009949048.1 PREDICTED: protein Wnt-8b [Leptosomus discolor]
ENSAPLG00020003610	194.279	86.1877	-1.17258	0.000100202	0.000783414	SNX27	XP_038023731.1 sorting nexin-27 isoform X1 [Anas platyrhynchos]
ENSAPLG00020009010	52.415	23.2043	-1.17559	0.000102276	0.000799215	TMEM231	XP_027321966.2 transmembrane protein 231 isoform X1 [Anas platyrhynchos]
ENSAPLG00020005286	2.73733	0.694	-1.97976	0.000102686	0.000801991	THNSL2	XP_012958639.4 threonine synthase-like 2 [Anas platyrhynchos]
ENSAPLG00020010818	0.167667	4.06533	4.59971	0.000102738	0.000801991	--	PKU41653.1 rna-directed dna polymerase from mobile element jockey-like [Limosa lapponica baueri]
ENSAPLG00020015389	78.5927	38.7227	-1.02122	0.000102949	0.00080322	ME2	XP_038026049.1 NAD-dependent malic enzyme, mitochondrial [Anas platyrhynchos]
ENSAPLG00020013915	6.43667	21.3263	1.72825	0.000104661	0.000816146	IMPA2	XP_027307868.2 inositol monophosphatase 2 [Anas platyrhynchos]
ENSAPLG00020006942	10.446	4.346	-1.26519	0.000105163	0.000819638	Vangl1	XP_012952726.1 vang-like protein 1 isoform X2 [Anas platyrhynchos]
MSTRG.16022	0.971333	8.89233	3.19452	0.000105807	0.000824226	Prdm8	NXF88672.1 taxid=91767 PRDM8 protein [Eubucco bourcierii]
ENSAPLG00020002533	60.3727	126.498	1.06715	0.000106451	0.000828813	CLEC4D	ABK91350.1 dendritic cell immunoactivating receptor isoform 1 [Anas platyrhynchos]
MSTRG.11325	0.242667	4.96167	4.35378	0.000106534	0.000829032	--	EOB04369.1 taxid=8839 hypothetical protein Anapl_08902 [Anas platyrhynchos]
ENSAPLG00020005812	46.1773	22.0717	-1.06499	0.000106661	0.000829582	NAT10	XP_027314130.1 RNA cytidine acetyltransferase [Anas platyrhynchos]
ENSAPLG00020005582	0.913333	5.38033	2.55848	0.000107272	0.000833901	SBSPON	XP_027328738.1 somatomedin-B and thrombospondin type-1 domain-containing protein isoform X2 [Anas platyrhynchos]
ENSAPLG00020008457	37.0203	16.21	-1.19143	0.000107556	0.000835677	USB1	XP_013031939.1 PREDICTED: U6 snRNA phosphodiesterase, partial [Anser cygnoides domesticus]
ENSAPLG00020002446	23.156	78.3963	1.7594	0.000107949	0.000838298	P2ry2	XP_038036127.1 P2Y purinoceptor 2 [Anas platyrhynchos]
ENSAPLG00020003906	0.264333	2.18567	3.04764	0.000108825	0.000844659	FUT10	XP_005019061.2 alpha-(1,3)-fucosyltransferase 10 [Anas platyrhynchos]
ENSAPLG00020009996	0.0376667	2.125	5.81803	0.000109184	0.000847009	--	XP_035425616.1 palmitoyltransferase ZDHHC21 isoform X1 [Cygnus atratus]
ENSAPLG00020004480	5.165	12.3457	1.25716	0.000110382	0.000855417	CANT1	XP_032055576.1 soluble calcium-activated nucleotidase 1 [Aythya fuligula]
ENSAPLG00020010505	201.495	94.5513	-1.09157	0.000110849	0.000858594	LRPAP1	XP_038033995.1 alpha-2-macroglobulin receptor-associated protein [Anas platyrhynchos]
ENSAPLG00020001297	8.441	2.683	-1.65357	0.000111181	0.000860718	NIPA1	XP_027302676.1 magnesium transporter NIPA1 [Anas platyrhynchos]
ENSAPLG00020005977	1.13367	4.66733	2.0416	0.000112119	0.00086753	Slc4a11	XP_040411092.1 sodium bicarbonate transporter-like protein 11 isoform X5 [Cygnus olor]
ENSAPLG00020017102	3.43133	0.746667	-2.20023	0.000112263	0.000868198	ARMH1	XP_035393877.1 armadillo-like helical domain containing protein 1 isoform X3 [Cygnus atratus]
ENSAPLG00020009585	19.0157	5.967	-1.67211	0.00011331	0.000875389	VLDLR	XP_038025306.1 LOW QUALITY PROTEIN: very low-density lipoprotein receptor-like [Anas platyrhynchos]
ENSAPLG00020007092	0.0996667	5.457	5.77485	0.000114811	0.00088653	Lpar3	XP_005022350.1 lysophosphatidic acid receptor 3 [Anas platyrhynchos]
ENSAPLG00020000439	0.0813333	1.84133	4.50076	0.000116013	0.00089535	DGKI	XP_027300983.2 diacylglycerol kinase iota isoform X6 [Anas platyrhynchos]
ENSAPLG00020007346	126.258	57.5617	-1.13319	0.000116715	0.000900303	IARS2	XP_027308926.2 isoleucine--tRNA ligase, mitochondrial [Anas platyrhynchos]
ENSAPLG00020004909	41.0817	82.7523	1.01031	0.000120924	0.000931333	RAB20	XP_005009112.1 ras-related protein Rab-20 [Anas platyrhynchos]
ENSAPLG00020001290	70.8163	32.9963	-1.10178	0.000121248	0.000933349	REEP3	XP_027319610.2 receptor expression-enhancing protein 3 isoform X2 [Anas platyrhynchos]
ENSAPLG00020002450	33.4427	13.4717	-1.31176	0.000121846	0.000937468	SECISBP2	XP_038026069.1 selenocysteine insertion sequence-binding protein 2 isoform X1 [Anas platyrhynchos]
ENSAPLG00020011998	2.90067	11.357	1.96913	0.000121917	0.000937533	CDK5R1	XP_027301023.2 cyclin-dependent kinase 5 activator 1 [Anas platyrhynchos]
ENSAPLG00020002036	84.453	41.3933	-1.02875	0.000122396	0.000940734	MTMR10	XP_032051132.1 myotubularin-related protein 10 [Aythya fuligula]
ENSAPLG00020011524	46.128	20.2283	-1.18927	0.000122469	0.000940811	SIL1	XP_005024984.2 nucleotide exchange factor SIL1 [Anas platyrhynchos]
MSTRG.20568	16.9923	50.804	1.58006	0.000122794	0.00094283	--	XP_032056870.1 taxid=219594 C-type lectin domain family 4 member D-like [Aythya fuligula]
MSTRG.2775	0.0903333	2.42567	4.74698	0.000123212	0.000945552	--	-
ENSAPLG00020014998	35.919	81.5857	1.18357	0.000123613	0.000948145	DOT1L	XP_027327968.1 histone-lysine N-methyltransferase, H3 lysine-79 specific isoform X5 [Anas platyrhynchos]
ENSAPLG00020000486	84.1593	35.8187	-1.23241	0.000124622	0.000955393	acat1-a	XP_038031648.1 acetyl-CoA acetyltransferase, mitochondrial isoform X2 [Anas platyrhynchos]
ENSAPLG00020012631	0.443667	6.014	3.76078	0.000125257	0.000959773	ELOVL4	XP_005012701.1 elongation of very long chain fatty acids protein 7 isoform X1 [Anas platyrhynchos]
ENSAPLG00020000121	12.8923	33.849	1.3926	0.000126346	0.000967619	TSTA3	XP_038031239.1 GDP-L-fucose synthase isoform X2 [Anas platyrhynchos]
ENSAPLG00020003788	0.037	2.01533	5.76735	0.000126604	0.000969098	ADAMTS13	XP_005013323.1 A disintegrin and metalloproteinase with thrombospondin motifs 13 isoform X3 [Anas platyrhynchos]
ENSAPLG00020015914	0.290333	1.584	2.44779	0.000127108	0.000972462	CPAMD8	XP_027327573.1 C3 and PZP-like alpha-2-macroglobulin domain-containing protein 8 isoform X1 [Anas platyrhynchos]
ENSAPLG00020004393	118.708	245.764	1.04985	0.000127339	0.000973731	CLEC4C	XP_038035410.1 C-type lectin domain family 6 member A-like isoform X2 [Anas platyrhynchos]
ENSAPLG00020010602	0.0833333	4.744	5.83107	0.000128242	0.000980136	GJB7	XP_012948948.1 gap junction beta-7 protein [Anas platyrhynchos]
ENSAPLG00020008984	61.0683	28.815	-1.0836	0.000128411	0.000980928	TERF2IP	XP_027321965.1 telomeric repeat-binding factor 2-interacting protein 1 isoform X2 [Anas platyrhynchos]
MSTRG.4464	0.220667	1.58733	2.84666	0.000129009	0.000984993	CSPG4	XP_038041010.1 taxid=8839 chondroitin sulfate proteoglycan 4 isoform X1 [Anas platyrhynchos]
ENSAPLG00020006583	47.934	21.1053	-1.18344	0.000129934	0.000991549	CPNE3	XP_038031265.1 copine-3 isoform X1 [Anas platyrhynchos]
MSTRG.7255	2.957	0.212667	-3.79747	0.000131056	0.0009996	STXBP4	XP_027327255.2 taxid=8839 syntaxin-binding protein 4 isoform X2 [Anas platyrhynchos]
ENSAPLG00020000357	36.774	74.787	1.0241	0.000131449	0.00100158	Mrpl13	XP_027308451.1 39S ribosomal protein L13, mitochondrial isoform X2 [Anas platyrhynchos]
ENSAPLG00020004510	0.152	1.58867	3.38567	0.00013181	0.00100382	DMTN	XP_038022891.1 dematin [Anas platyrhynchos]
ENSAPLG00020012106	2456.4	973.088	-1.3359	0.000132779	0.00101069	CTSH	XP_027321911.1 pro-cathepsin H [Anas platyrhynchos]
ENSAPLG00020013067	20.8123	8.46867	-1.29723	0.000133638	0.0010167	--	XP_027329070.1 signal-regulatory protein beta-1 [Anas platyrhynchos]
ENSAPLG00020012566	8.83133	20.861	1.24011	0.000134053	0.00101935	PAK3	XP_027321155.1 serine/threonine-protein kinase PAK 3 isoform X1 [Anas platyrhynchos]
ENSAPLG00020018454	0.129	1.82867	3.82535	0.000134233	0.0010202	VASN	XP_035195790.1 vasorin isoform X1 [Oxyura jamaicensis]
ENSAPLG00020006278	3.418	0.319333	-3.42002	0.000135106	0.00102579	RUNX1T1	XP_005231074.1 protein CBFA2T1 isoform X1 [Falco peregrinus]
ENSAPLG00020008834	4.29833	0.288667	-3.8963	0.000135363	0.00102723	AADACL4	XP_027299138.1 arylacetamide deacetylase-like 4 [Anas platyrhynchos]
MSTRG.6193	26.5817	53.7777	1.01658	0.000135695	0.0010287	--	-
ENSAPLG00020011967	85.722	41.6757	-1.04046	0.00013634	0.00103201	CASC4	XP_027321425.1 protein GOLM2 isoform X2 [Anas platyrhynchos]
ENSAPLG00020016518	526.407	1338.44	1.3463	0.000136367	0.00103201	C1QA	XP_038022604.1 complement C1q subcomponent subunit A [Anas platyrhynchos]
ENSAPLG00020006198	152.463	67.8447	-1.16816	0.000136407	0.00103201	CPEB4	XP_013047291.1 PREDICTED: cytoplasmic polyadenylation element-binding protein 4 isoform X1 [Anser cygnoides domesticus]
ENSAPLG00020010272	15.8647	4.89433	-1.69663	0.000137441	0.00103931	NCF2	XP_027326791.2 NADPH oxidase activator 1 [Anas platyrhynchos]
ENSAPLG00020003207	14.984	53.4807	1.83559	0.000137545	0.00103957	MGAT1	XP_035197042.1 alpha-1,3-mannosyl-glycoprotein 2-beta-N-acetylglucosaminyltransferase [Oxyura jamaicensis]
ENSAPLG00020013005	24.5407	11.078	-1.14748	0.000139743	0.00105565	MAP3K5	XP_027310265.2 mitogen-activated protein kinase kinase kinase 5 [Anas platyrhynchos]
ENSAPLG00020016479	14.3847	4.15467	-1.79173	0.000139949	0.00105667	Plpp3	XP_021128947.2 phospholipid phosphatase 3 [Anas platyrhynchos]
ENSAPLG00020010992	1.351	0.0706667	-4.25685	0.000140261	0.0010585	EPHA3	XP_027305220.2 ephrin type-A receptor 3 isoform X1 [Anas platyrhynchos]
ENSAPLG00020011896	5.94633	1.591	-1.90207	0.000142353	0.00107374	ARAP3	XP_027324108.1 arf-GAP with Rho-GAP domain, ANK repeat and PH domain-containing protein 3 isoform X2 [Anas platyrhynchos]
ENSAPLG00020012694	0.001	1.05533	10.0435	0.000143185	0.00107893	FOXF1	XP_032051767.1 forkhead box protein F1 [Aythya fuligula]
ENSAPLG00020006741	13.1517	4.60067	-1.51533	0.000143337	0.00107953	KYAT3	XP_005029324.1 kynurenine--oxoglutarate transaminase 3 isoform X1 [Anas platyrhynchos]
ENSAPLG00020004093	0.0263333	1.67467	5.99084	0.000143746	0.00108207	AK8	XP_027326412.2 LOW QUALITY PROTEIN: adenylate kinase 8 [Anas platyrhynchos]
MSTRG.8405	0.720333	7.204	3.32206	0.000144097	0.00108417	--	-
ENSAPLG00020014528	0.001	1.253	10.2912	0.000144247	0.00108475	CTIF	XP_038025381.1 CBP80/20-dependent translation initiation factor isoform X1 [Anas platyrhynchos]
MSTRG.20873	17.3027	6.03133	-1.52045	0.000144492	0.00108605	--	XP_032050109.1 taxid=219594 extensin-like [Aythya fuligula]
ENSAPLG00020007629	2.83233	0.052	-5.76734	0.000144678	0.0010869	WNT2B	XP_027300720.1 protein Wnt-2b [Anas platyrhynchos]
ENSAPLG00020006914	3.98233	0.774	-2.36321	0.000145146	0.00108987	TMTC4	XP_027299524.1 protein O-mannosyl-transferase TMTC4 [Anas platyrhynchos]
MSTRG.12788	14.3127	45.306	1.66241	0.000146259	0.00109767	--	XP_038028263.1 taxid=8839 nuclear GTPase SLIP-GC-like isoform X2 [Anas platyrhynchos]
ENSAPLG00020012304	21.386	59.7223	1.4816	0.000147339	0.00110522	GBP1	XP_038041838.1 guanylate-binding protein 1-like [Anas platyrhynchos]
ENSAPLG00020006979	19.081	7.63433	-1.32156	0.000148414	0.00111273	Pcca	XP_035174556.1 propionyl-CoA carboxylase alpha chain, mitochondrial [Oxyura jamaicensis]
ENSAPLG00020004258	2.45	0.111667	-4.45551	0.000149079	0.00111716	trabd2a	XP_038027005.1 metalloprotease TIKI1-like isoform X2 [Anas platyrhynchos]
ENSAPLG00020015829	19.9763	9.14967	-1.1265	0.000149158	0.0011172	Anks1a	XP_032059274.1 ankyrin repeat and SAM domain-containing protein 1A isoform X3 [Aythya fuligula]
ENSAPLG00020017027	1.45833	7.09567	2.28262	0.000150643	0.00112775	NXN	XP_032056951.1 nucleoredoxin [Aythya fuligula]
ENSAPLG00020004787	52.7397	20.662	-1.35191	0.000151747	0.00113545	Cltc	XP_027325725.1 clathrin heavy chain 2 isoform X2 [Anas platyrhynchos]
ENSAPLG00020013149	419.826	203.949	-1.04158	0.000152466	0.00114026	Aplp2	OXB57350.1 hypothetical protein ASZ78_007672 [Callipepla squamata]
ENSAPLG00020000364	19.4753	46.365	1.25139	0.000153741	0.00114828	TRIM35	XP_027311270.2 tripartite motif-containing protein 35 isoform X3 [Anas platyrhynchos]
MSTRG.15217	0.001	7.26667	12.8271	0.000153768	0.00114828	CD163	XP_038028667.1 taxid=8839 scavenger receptor cysteine-rich type 1 protein M130-like [Anas platyrhynchos]
ENSAPLG00020009502	12.077	24.867	1.04197	0.00015516	0.0011581	RICTOR	XP_038025859.1 rapamycin-insensitive companion of mTOR isoform X1 [Anas platyrhynchos]
ENSAPLG00020010247	33.781	14.6893	-1.20144	0.000157498	0.00117496	ARSK	XP_038026042.1 arylsulfatase K [Anas platyrhynchos]
ENSAPLG00020007055	0.0446667	1.31767	4.88264	0.000157915	0.00117749	WDR63	XP_038038536.1 dynein intermediate chain 3, axonemal, partial [Anas platyrhynchos]
ENSAPLG00020011478	24.1053	7.555	-1.67385	0.000158414	0.00118012	PLAT	XP_038022830.1 tissue-type plasminogen activator [Anas platyrhynchos]
ENSAPLG00020007622	0.0713333	2.20133	4.94766	0.000158426	0.00118012	Golph3	XP_038025359.1 Golgi phosphoprotein 3 [Anas platyrhynchos]
MSTRG.12860	5.88967	1.09933	-2.42156	0.000158787	0.00118222	Neil2	XP_027311188.1 taxid=8839 endonuclease 8-like 2 [Anas platyrhynchos]
ENSAPLG00020013776	1.89833	46.1987	4.60505	0.000159167	0.00118446	Gpr35	XP_005028658.2 G-protein coupled receptor 35 [Anas platyrhynchos]
ENSAPLG00020007153	7.499	1.43233	-2.38833	0.000159414	0.00118567	--	XP_040434397.1 uncharacterized protein LOC121080446 [Falco naumanni]
ENSAPLG00020003507	54.9797	26.9163	-1.03042	0.000159488	0.00118567	NDRG3	XP_027328770.1 protein NDRG3 isoform X1 [Anas platyrhynchos]
ENSAPLG00020005069	66.8133	28.9563	-1.20626	0.000159886	0.00118804	HELLS	XP_027316688.1 lymphoid-specific helicase isoform X1 [Anas platyrhynchos]
ENSAPLG00020000604	188.031	89.6167	-1.06913	0.000160413	0.00119137	RFTN1	XP_027306814.2 LOW QUALITY PROTEIN: raftlin [Anas platyrhynchos]
ENSAPLG00020011835	64.7607	30.599	-1.08163	0.000160538	0.00119171	ZDHHC12	XP_005022739.3 palmitoyltransferase ZDHHC12 [Anas platyrhynchos]
ENSAPLG00020015407	551.289	243.492	-1.17894	0.000161276	0.00119659	SLC6A8	OXB66239.1 hypothetical protein ASZ78_000664 [Callipepla squamata]
MSTRG.10149	3.77867	1.36667	-1.46722	0.000161522	0.00119783	--	KAI6074252.1 taxid=8832 Myosin regulatory light chain 10 isoform X2 [Aix galericulata]
ENSAPLG00020017228	5.38967	1.28933	-2.06357	0.0001621	0.00120151	MMACHC	XP_027319012.1 cyanocobalamin reductase / alkylcobalamin dealkylase isoform X2 [Anas platyrhynchos]
ENSAPLG00020016590	10.4977	31.1383	1.56862	0.000162705	0.0012054	SIVA1	XP_027314921.1 apoptosis regulatory protein Siva [Anas platyrhynchos]
ENSAPLG00020015932	16.979	7.493	-1.18014	0.00016478	0.00122017	TADA2A	XP_005012647.1 LOW QUALITY PROTEIN: transcriptional adapter 2-alpha [Anas platyrhynchos]
ENSAPLG00020015364	51.7927	24.0443	-1.10705	0.000164942	0.00122077	NCBP2	XP_027324467.2 nuclear cap-binding protein subunit 2 [Anas platyrhynchos]
ENSAPLG00020011684	50.7227	19.376	-1.38836	0.000165576	0.00122485	IFT43	XP_027314295.1 intraflagellar transport protein 43 homolog isoform X2 [Anas platyrhynchos]
ENSAPLG00020002358	29.2447	12.3043	-1.24901	0.000166954	0.00123444	TBC1D8B	XP_038040423.1 TBC1 domain family member 8B isoform X1 [Anas platyrhynchos]
ENSAPLG00020003255	0.243	2.08467	3.10079	0.000169821	0.00125502	selenbp1-a	XP_038023954.1 methanethiol oxidase [Anas platyrhynchos]
ENSAPLG00020010159	5.023	1.813	-1.47017	0.0001731	0.00127862	Oga	XP_038034463.1 protein O-GlcNAcase-like isoform X5 [Anas platyrhynchos]
ENSAPLG00020005537	110.647	51.092	-1.1148	0.000173207	0.00127878	JPT2	XP_027324876.1 jupiter microtubule associated homolog 2 [Anas platyrhynchos]
MSTRG.2334	0.970667	6.22633	2.68133	0.000174076	0.00128456	--	-
ENSAPLG00020009774	0.001	2.007	10.9708	0.00017441	0.00128576	SMTN	XP_032054902.1 smoothelin isoform X1 [Aythya fuligula]
[truncated: 1,053 more rows]
