# Supplementary material
Source: Research Square preprint supplement (doi:10.21203/rs.3.rs-9362542/v1)
Supplement: Supplementary file 1 [file a3952e787f4f26b619021414.docx]

**Tables**

Table 1 Sequences of primers used in this study

Table 2 Statistics of the RNA-seq datasets

Table 1

| Gene symbol | | Forward primer sequence (5'-3') | Reverse primer sequence (5'-3') | | | GenBank No. |
| --- | --- | --- | --- | --- | --- | --- |
| IFIT5  OASL  Mx1  CH25H  MDA5  TLR7 | CAGAATTTAATGCCGGCTATGC  ACATCCTGCCTGCTTACGAC  TGCTTCACGTCAATGTCCCA  AATCCAGCCGCAGAGCTATC  GCAAAACCAGCACTGAATGGG  TCTGGACTTCTCTAACAACA | | TGCAAGTAAAGCCAAAAGATAAGTGT  GTTGGGGTACTTCGGCTTCA  TGCTCAGGCGTTTACTTGCT  CAGCTCTGGAGCTATCACCG  CGTAAATGCTGTTCCACTAACGG  AATCTCATTCTCATTCATCATCA | XM_421662.4  NM_205041.1  NM_204609.2  NM_001277354.1  AB371640.1  FJ915592.1 | |
| IFN-α | TGGTGTGTTGCGAAGAGGAA | | GGAGACTAGTGTGGGTTGGC | | GU119896.1 |
| IFN-β | AGGCTTCGGGTTTGGAGATG | | CAAACAGGAAGAGGCGGGAT | | AY831397 |
| IFN-γ | GGCTCCATCATCAGCTCCTA | | ATTCTCTGCCATTTGGGTGT | | X92479 |
| TNF-α  CCL-4  CCL-19  CCL-20  PKR  IL1β  IL6  IL8  NDRV-S1  duGAPDH  chGAPDH | CGCAGCACAACAAGCTCTTT  CTTCACCTACATCTCCCGGC  TGCCTTAGTCTCCTGGTGCT  ATGCCATCATTTTCCACACCGTCAG  GCAGAAGTAAGAGTGAGGCAAATGAGTGAGGCTCAACATTGCGCTGTA  AAATCCCTCCTCGCCAATCT  CATCATGAAGCATTCCATCT  AGCGGACCATGTTGCTTATG  ATGTTCGTGATGGGTGTGAA  GAACATCATCCCAGCGTCCA | | TGCCAGCCTCTTCTTCAGTG  CTGTACCCAGTCGTTCTCGG  CTTTGCAGTGATGAACACGGT  AGATGCTTCTTCACCCAGTCTTCCT  GCCACCTTTACCAATAGGCTCTAT  TGTCCAGGCGGTAGAAGATGAAG  CCCTCACGGTCTTCTCCATAAA  CTTCCAAGGGATCTTCATTT  AGAAGCAAAAGCAGCGGAAG  CTGTCTTCGTGTGTGGCTGT  CGGCAGGTCAGGTCAACAAC | | NM_204267.1  NM_001030360  NM_001302168.1  NM_204438.2  HQO14737  NM_204524.1  AJ309540.1  NM_205498.1  MK955827.1  GU564233  NM_204305.1 |

Table 2

| Sample | Raw Reads | Clean Reads Q20 (%) Q30 (%) Total Mapped (%) Unique Mapped (%) |  |
| --- | --- | --- | --- |
| NDRV12-1 | 6017391300 | 5914750209 97.88 94.62 89.47 82.29 |  |
| NDRV12-2 | 5769503400 | 5675437838 97.63 94.00 90.28 84.53 |  |
| NDRV12-3 | 6544093800 | 6426621325 97.80 94.31 90.82 84.30 |  |
| NDRV24-1 | 6548370300 | 6436406787 97.62 93.85 91.33 85.18 |  |
| NDRV24-2 | 5822802600 | 5715037356 97.61 93.86 89.85 83.99 |  |
| NDRV24-3 | 6668154900 | 6566737958 97.71 94.05 90.99 84.47 |  |
| Mock-1 | 5402681400 | 5315945548 97.81 94.22 91.60 86.03 |  |
| Mock-2 | 5944199700 | 5849252207 97.76 94.14 91.58 85.90 |  |
| Mock-3 | 6255695400 | 6156953274 97.85 94.37 91.27 85.62 |  |
