# Supplementary material
Source: Research Square preprint supplement (doi:10.21203/rs.3.rs-9362542/v1)
Supplement: Supplementary file 3 [file b7bff4ced3d354db240e070c.xlsx]

## Sheet: C-vs-T24.filter.annot
id	C_mean	T24_mean	log2(fc)	PValue	FDR	Symbol	Description
ENSAPLG00020012247	6.95967	1296.58	7.54148	2.61738e-190	3.87713e-186	NOS2	XP_027327526.2 nitric oxide synthase, inducible isoform X1 [Anas platyrhynchos]
ENSAPLG00020016376	2.568	586.079	7.83431	7.79263e-120	5.77161e-116	CCL4	XP_027301799.1 C-C motif chemokine 4-like [Anas platyrhynchos]
ENSAPLG00020015907	1137.45	45.2893	-4.65049	7.34197e-86	3.62522e-82	CHIA	XP_038024147.1 acidic mammalian chitinase isoform X1 [Anas platyrhynchos]
ENSAPLG00020016438	42.621	918.151	4.42909	9.66912e-74	2.89414e-70	CCL14	EOB04010.1 C-C motif chemokine 13 [Anas platyrhynchos]
ENSAPLG00020004970	5.779	404.337	6.12859	9.76894e-74	2.89414e-70	RSAD2	NP_001297730.1 radical S-adenosyl methionine domain-containing protein 2 precursor [Anas platyrhynchos]
ENSAPLG00020001706	40.577	480.368	3.5654	7.23547e-72	1.78632e-68	Mitd1	XP_005013490.3 MIT domain-containing protein 1 isoform X1 [Anas platyrhynchos]
ENSAPLG00020016440	343.079	5125.23	3.901	7.08491e-71	1.49927e-67	CCL3	XP_005010712.3 C-C motif chemokine 3 [Anas platyrhynchos]
ENSAPLG00020015912	597.819	18.4503	-5.01799	1.90311e-70	3.52385e-67	CHIA	XP_038024146.1 acidic mammalian chitinase isoform X3 [Anas platyrhynchos]
ENSAPLG00020006342	27.1323	331.284	3.60998	8.16098e-68	1.34321e-64	IRF1	EOA93465.1 Interferon regulatory factor 1, partial [Anas platyrhynchos]
ENSAPLG00020005012	2.06367	227.692	6.78573	3.39148e-67	5.0238e-64	CMPK2	XP_005018632.2 UMP-CMP kinase 2, mitochondrial [Anas platyrhynchos]
ENSAPLG00020013051	28.9903	342.197	3.56118	1.12236e-64	1.51142e-61	Helz2	XP_038022027.1 LOW QUALITY PROTEIN: helicase with zinc finger domain 2 [Anas platyrhynchos]
ENSAPLG00020018285	0.736667	154.988	7.71693	1.23106e-59	1.51964e-56	IFN	NP_001297756.2 interferon-like precursor [Anas platyrhynchos]
ENSAPLG00020002085	121.333	941.363	2.95578	2.92971e-58	3.3383e-55	SDC4	XP_005023944.1 syndecan-4 [Anas platyrhynchos]
ENSAPLG00020000387	119.11	3.92267	-4.92432	1.13015e-57	1.19577e-54	MRC1	XP_038030179.1 macrophage mannose receptor 1 isoform X1 [Anas platyrhynchos]
ENSAPLG00020011550	357.962	26.8463	-3.73701	2.40944e-55	2.3794e-52	LY86	XP_005010761.3 lymphocyte antigen 86 isoform X1 [Anas platyrhynchos]
ENSAPLG00020012506	6.99867	99.619	3.83127	3.7771e-55	3.49689e-52	P2RX7	XP_005028243.1 P2X purinoceptor 7 [Anas platyrhynchos]
ENSAPLG00020017913	870.746	82.186	-3.40529	4.98003e-55	4.33936e-52	--	KAF1474629.1 Endogenous retrovirus group K member 8 Gag polyprotein, partial [Pygoscelis antarcticus]
ENSAPLG00020010497	571.481	55.837	-3.35541	1.37899e-54	1.13483e-51	MGLL	XP_005011911.1 monoglyceride lipase isoform X2 [Anas platyrhynchos]
MSTRG.17258	3.02967	61.936	4.35355	5.36236e-53	4.18066e-50	Cdhr5	XP_027314685.2 taxid=8839 cadherin-related family member 5 [Anas platyrhynchos]
ENSAPLG00020013825	0.428333	25.3113	5.88491	2.76455e-52	2.04756e-49	TBC1D4	XP_038040658.1 LOW QUALITY PROTEIN: TBC1 domain family member 4 [Anas platyrhynchos]
ENSAPLG00020016171	8.90667	98.446	3.46638	5.4853e-51	3.86922e-48	PML	XP_038040928.1 LOW QUALITY PROTEIN: protein PML [Anas platyrhynchos]
ENSAPLG00020002310	41.5353	951.372	4.5176	1.34792e-49	9.07576e-47	--	XP_005018366.1 L-amino-acid oxidase [Anas platyrhynchos]
ENSAPLG00020003819	680.679	76.0027	-3.16285	4.38411e-49	2.82356e-46	LPL	XP_027302192.2 lipoprotein lipase [Anas platyrhynchos]
ENSAPLG00020013873	24.4067	586.314	4.58633	1.47328e-48	9.09322e-46	USP18	XP_005009988.2 ubl carboxyl-terminal hydrolase 18 isoform X1 [Anas platyrhynchos]
ENSAPLG00020010587	14.8227	164.418	3.47149	1.20385e-46	7.13308e-44	TRIM27	XP_032061084.1 zinc finger protein RFP-like [Aythya fuligula]
ENSAPLG00020009946	197.08	21.214	-3.21569	3.20836e-46	1.8279e-43	HPGD	XP_005027515.1 15-hydroxyprostaglandin dehydrogenase [NAD(+)] [Anas platyrhynchos]
ENSAPLG00020001405	975.476	56.153	-4.11867	4.5912e-46	2.51887e-43	QNR-71	XP_005020586.1 transmembrane glycoprotein NMB [Anas platyrhynchos]
ENSAPLG00020013433	105.07	4596.63	5.45115	2.66485e-45	1.4098e-42	IFIT5	XP_027316266.1 LOW QUALITY PROTEIN: interferon-induced protein with tetratricopeptide repeats 5 [Anas platyrhynchos]
ENSAPLG00020001305	41.0657	318.352	2.95462	2.93178e-43	1.48658e-40	Sdc1	XP_027311103.1 syndecan-1 [Anas platyrhynchos]
ENSAPLG00020000772	2.597	135.235	5.70248	3.0107e-43	1.48658e-40	HPGDS	XP_005024474.1 hematopoietic prostaglandin D synthase [Anas platyrhynchos]
ENSAPLG00020016162	3.02333	48.64	4.00793	2.28868e-42	1.09362e-39	PML	XP_038040926.1 protein PML isoform X6 [Anas platyrhynchos]
ENSAPLG00020017444	6.825	128.39	4.23356	2.50223e-42	1.1583e-39	GCH1	XP_027315086.2 LOW QUALITY PROTEIN: GTP cyclohydrolase 1 [Anas platyrhynchos]
ENSAPLG00020016374	308.459	4263.98	3.78905	4.4952e-42	2.0178e-39	Ccl5	NP_001297326.1 C-C motif chemokine 26 precursor [Anas platyrhynchos]
ENSAPLG00020010056	13.2187	211.954	4.0031	1.89221e-41	8.2439e-39	Eif2ak2	XP_027309704.2 interferon-induced, double-stranded RNA-activated protein kinase isoform X6 [Anas platyrhynchos]
MSTRG.16445	323.399	34.6257	-3.2234	2.80076e-41	1.18536e-38	--	XP_038034677.1 taxid=8839 mucin-2 isoform X1 [Anas platyrhynchos]
ENSAPLG00020005177	5.452	55.2207	3.34035	6.86452e-41	2.82456e-38	EZR	XP_032041357.1 ezrin isoform X1 [Aythya fuligula]
ENSAPLG00020015565	78.1627	2.019	-5.27477	7.46538e-41	2.98877e-38	UCHL1	XP_032042433.1 ubiquitin carboxyl-terminal hydrolase isozyme L1 [Aythya fuligula]
ENSAPLG00020011690	82.4467	7.008	-3.55639	1.08273e-40	4.22067e-38	TGFB3	XP_038036150.1 transforming growth factor beta-3 proprotein [Anas platyrhynchos]
ENSAPLG00020004180	10.0917	115.448	3.516	2.07139e-40	7.86756e-38	TNIP3	XP_038034670.1 LOW QUALITY PROTEIN: TNFAIP3-interacting protein 3 [Anas platyrhynchos]
ENSAPLG00020000757	7.311	152.98	4.38713	9.759e-40	3.614e-37	DDX60	XP_038034270.1 probable ATP-dependent RNA helicase DDX60 isoform X2 [Anas platyrhynchos]
ENSAPLG00020010623	87.7263	1045.49	3.57503	3.84128e-39	1.38782e-36	--	XP_005018366.1 L-amino-acid oxidase [Anas platyrhynchos]
ENSAPLG00020011749	32.128	275.385	3.09955	4.149e-39	1.46331e-36	RILPL2	XP_027326033.1 RILP-like protein 2 isoform X1 [Anas platyrhynchos]
ENSAPLG00020001331	137.226	24.5743	-2.48133	1.20016e-38	4.13442e-36	HERC2	XP_027302670.2 E3 ubiquitin-protein ligase HERC2 isoform X1 [Anas platyrhynchos]
MSTRG.5313	3.283	55.5	4.0794	2.30513e-38	7.76043e-36	--	-
ENSAPLG00020002749	1.34767	24.6967	4.19578	7.26362e-38	2.39102e-35	EMB	XP_038026635.1 embigin isoform X2 [Anas platyrhynchos]
ENSAPLG00020004653	0.654	21.6127	5.04644	8.80316e-38	2.83481e-35	FLT1	XP_032048317.1 vascular endothelial growth factor receptor 1 isoform X1 [Aythya fuligula]
MSTRG.20008	7.01133	121.476	4.11483	1.24224e-37	3.91517e-35	LAMP3	XP_005024729.2 taxid=8839 lysosome-associated membrane glycoprotein 3 [Anas platyrhynchos]
ENSAPLG00020000191	475.93	28.5497	-4.0592	1.46994e-37	4.5363e-35	TYR	EOA94303.1 Tyrosinase, partial [Anas platyrhynchos]
ENSAPLG00020011897	110.805	867.981	2.96964	2.47708e-37	7.48837e-35	Gimap1	XP_038030419.1 GTPase IMAP family member 1-like [Anas platyrhynchos]
ENSAPLG00020015795	62.0343	1121.62	4.17637	5.39944e-37	1.59964e-34	Oasl2	XP_038041887.1 LOW QUALITY PROTEIN: 2'-5'-oligoadenylate synthase-like protein 2 [Anas platyrhynchos]
ENSAPLG00020013361	2.48233	64.4127	4.69758	6.07866e-37	1.76555e-34	PPP1R3C	XP_027316129.1 protein phosphatase 1 regulatory subunit 3C [Anas platyrhynchos]
ENSAPLG00020001775	103.517	5.89267	-4.1348	6.90637e-37	1.96739e-34	TSPAN13	XP_027306700.1 tetraspanin-13 [Anas platyrhynchos]
ENSAPLG00020015294	10.5943	111.994	3.40205	1.48222e-36	4.14266e-34	GBP2	XP_038028610.1 guanylate-binding protein 2-like [Anas platyrhynchos]
ENSAPLG00020009206	0.101333	7.785	6.26352	6.98133e-36	1.91508e-33	MAP1B	XP_038025844.1 microtubule-associated protein 1B [Anas platyrhynchos]
ENSAPLG00020002212	14.7	122.432	3.05809	1.30092e-35	3.50373e-33	C1S	XP_038026806.1 complement C1s subcomponent isoform X2 [Anas platyrhynchos]
ENSAPLG00020002775	281.2	1337.12	2.24947	1.51737e-35	4.01371e-33	ITA	EOB07956.1 Inhibitor of apoptosis protein, partial [Anas platyrhynchos]
ENSAPLG00020014738	29.3063	237.347	3.01772	7.69565e-35	1.99993e-32	--	XP_032062987.1 intercellular adhesion molecule 5 [Aythya fuligula]
ENSAPLG00020001474	1.594	17.216	3.43303	7.92e-35	2.02274e-32	Atp10a	XP_038029111.1 probable phospholipid-transporting ATPase VA isoform X1 [Anas platyrhynchos]
ENSAPLG00020015566	1.18433	39.4983	5.05964	1.14304e-34	2.86981e-32	Gpa33	XP_005017719.2 cell surface A33 antigen [Anas platyrhynchos]
MSTRG.16444	123.938	14.495	-3.09599	2.42554e-34	5.98826e-32	--	XP_038034677.1 taxid=8839 mucin-2 isoform X1 [Anas platyrhynchos]
ENSAPLG00020012303	52.4737	309.665	2.56104	2.75548e-34	6.68819e-32	GBP1	XP_038041838.1 guanylate-binding protein 1-like [Anas platyrhynchos]
ENSAPLG00020001388	20.7697	1.485	-3.80594	2.79935e-34	6.68819e-32	KIAA1324L	XP_027315998.2 endosome/lysosome-associated apoptosis and autophagy regulator family member 2 isoform X1 [Anas platyrhynchos]
ENSAPLG00020017792	3.19133	38.7663	3.60257	4.80695e-34	1.13024e-31	Kcnk1	XP_027308792.1 potassium channel subfamily K member 1 [Anas platyrhynchos]
ENSAPLG00020014337	899.571	92.559	-3.28079	6.75456e-34	1.56337e-31	Naaa	XP_027311869.2 N-acylethanolamine-hydrolyzing acid amidase [Anas platyrhynchos]
ENSAPLG00020010387	0.807	35.265	5.44952	9.50685e-34	2.16654e-31	Irf4	XP_038031219.1 LOW QUALITY PROTEIN: interferon regulatory factor 4 [Anas platyrhynchos]
ENSAPLG00020014965	0.565333	30.8393	5.76953	1.0488e-33	2.35392e-31	IL12RB1	XP_035203908.1 interleukin-12 receptor subunit beta-1 isoform X1 [Oxyura jamaicensis]
ENSAPLG00020016596	18.8273	185.543	3.30085	1.18114e-33	2.61137e-31	Aspg	XP_005030045.2 60 kDa lysophospholipase isoform X1 [Anas platyrhynchos]
MSTRG.5023	11.9387	58.5883	2.29497	2.57843e-33	5.61681e-31	NLRC5	XP_012955436.3 taxid=8839 LOW QUALITY PROTEIN: protein NLRC5 [Anas platyrhynchos]
ENSAPLG00020008058	19.7263	0.950667	-4.37504	2.87955e-33	6.18186e-31	CASR	XP_027305513.2 LOW QUALITY PROTEIN: extracellular calcium-sensing receptor [Anas platyrhynchos]
ENSAPLG00020018243	116.327	16.9327	-2.7803	3.10486e-33	6.57033e-31	ATP6V0A1	XP_027301089.1 V-type proton ATPase 116 kDa subunit a1 isoform X3 [Anas platyrhynchos]
ENSAPLG00020018208	22.7873	265.857	3.54435	4.11328e-33	8.5817e-31	DHX58	XP_038024806.1 LOW QUALITY PROTEIN: probable ATP-dependent RNA helicase DHX58 [Anas platyrhynchos]
ENSAPLG00020003222	325.356	68.936	-2.23869	4.25957e-33	8.76347e-31	Cyb561a3	XP_032045022.1 cytochrome b ascorbate-dependent protein 3 isoform X1 [Aythya fuligula]
ENSAPLG00020017603	7.04167	74.839	3.4098	4.99436e-33	1.01344e-30	fam162b	XP_005031235.1 protein FAM162B [Anas platyrhynchos]
ENSAPLG00020011779	119.372	17.496	-2.77037	1.3196e-32	2.64153e-30	ARHGAP15	XP_038037966.1 rho GTPase-activating protein 15 isoform X1 [Anas platyrhynchos]
ENSAPLG00020018194	56.3953	344.733	2.61183	1.47563e-32	2.91447e-30	CNP	XP_027301001.1 2',3'-cyclic-nucleotide 3'-phosphodiesterase isoform X1 [Anas platyrhynchos]
ENSAPLG00020008951	16.0423	104.514	2.70374	3.72282e-32	7.25607e-30	Tpm3	XP_030368555.1 tropomyosin beta chain isoform X3 [Strigops habroptila]
ENSAPLG00020012051	15.7107	130.605	3.0554	7.6044e-32	1.46291e-29	TRANK1	XP_038030496.1 TPR and ankyrin repeat-containing protein 1 isoform X4 [Anas platyrhynchos]
ENSAPLG00020009565	145.775	33.42	-2.12496	7.85899e-32	1.4925e-29	DAPK1	XP_038026185.1 death-associated protein kinase 1 [Anas platyrhynchos]
ENSAPLG00020017677	33.506	167.916	2.32525	1.00611e-31	1.88652e-29	IRF3	AID76935.1 interferon regulatory factor 7 [Anas platyrhynchos]
MSTRG.92	22.87	129.348	2.49973	1.81639e-31	3.36327e-29	FBH1	XP_038029132.1 taxid=8839 LOW QUALITY PROTEIN: F-box DNA helicase 1 [Anas platyrhynchos]
ENSAPLG00020017300	54.3163	6.62567	-3.03525	3.40669e-31	6.23004e-29	ENTPD1	XP_005013507.1 LOW QUALITY PROTEIN: ectonucleoside triphosphate diphosphohydrolase 1 [Anas platyrhynchos]
ENSAPLG00020014256	5.84267	47.258	3.01586	4.09393e-31	7.39553e-29	MCTP2	XP_027321846.2 multiple C2 and transmembrane domain-containing protein 2 isoform X1 [Anas platyrhynchos]
ENSAPLG00020014497	0.124333	76.2133	9.25969	7.66206e-31	1.36745e-28	ATP5F1A	XP_027303553.1 ATP synthase subunit alpha, mitochondrial [Anas platyrhynchos]
MSTRG.7329	7.269	123.18	4.08287	1.17742e-30	2.07633e-28	--	XP_032055888.1 taxid=219594 uncharacterized protein LOC116496733 isoform X2 [Aythya fuligula]
ENSAPLG00020007506	30.9353	190.729	2.6242	1.47835e-30	2.57632e-28	TNFRSF18	XP_005008864.1 tumor necrosis factor receptor superfamily member 18 isoform X2 [Anas platyrhynchos]
ENSAPLG00020016902	4.80267	76.113	3.98624	1.85897e-30	3.20198e-28	NFATC1	XP_032037455.1 nuclear factor of activated T-cells, cytoplasmic 1 isoform X1 [Aythya fuligula]
ENSAPLG00020001026	72.8017	1575.55	4.43574	2.2028e-30	3.75058e-28	MX	NP_001297338.1 interferon-induced GTP-binding protein Mx [Anas platyrhynchos]
ENSAPLG00020000277	1.22	50.8437	5.38112	4.31067e-30	7.25614e-28	slc25a30	XP_005026269.1 kidney mitochondrial carrier protein 1 isoform X1 [Anas platyrhynchos]
ENSAPLG00020002204	2.718	47.9577	4.14114	5.47095e-30	9.10576e-28	Stc1	XP_026718815.1 stanniocalcin-1 [Athene cunicularia]
ENSAPLG00020002971	0.759333	19.2537	4.66426	5.83291e-30	9.60032e-28	ITGA2	XP_038026831.1 integrin alpha-2 [Anas platyrhynchos]
ENSAPLG00020000151	13.9523	133.056	3.25346	1.03799e-29	1.68964e-27	TSPAN8	EOA97818.1 Tetraspanin-8 [Anas platyrhynchos]
ENSAPLG00020009920	24.0643	0.087	-8.11167	2.08751e-29	3.36112e-27	SH3TC1	XP_005016255.3 SH3 domain and tetratricopeptide repeat-containing protein 1 isoform X4 [Anas platyrhynchos]
ENSAPLG00020009424	19.0333	0.295667	-6.00841	2.28555e-29	3.64042e-27	Olfml1	XP_005014037.1 olfactomedin-like protein 1 [Anas platyrhynchos]
ENSAPLG00020001580	1.3	18.359	3.8199	3.92273e-29	6.18164e-27	SEMA3C	XP_005016762.1 semaphorin-3C [Anas platyrhynchos]
ENSAPLG00020007284	34.24	2.68333	-3.67358	7.34907e-29	1.14591e-26	SLC24A4	XP_027315072.2 sodium/potassium/calcium exchanger 4 isoform X2 [Anas platyrhynchos]
ENSAPLG00020007897	62.7527	401.911	2.67913	7.88637e-29	1.21688e-26	ACSL1	XP_027312086.1 long-chain-fatty-acid--CoA ligase 1 [Anas platyrhynchos]
ENSAPLG00020006670	50.8093	215.399	2.08385	1.72607e-28	2.6359e-26	TAP2	XP_005030429.3 antigen peptide transporter 2 [Anas platyrhynchos]
ENSAPLG00020000006	55.8167	6.31767	-3.14323	2.38061e-28	3.59836e-26	MAOA	XP_027304796.1 amine oxidase [flavin-containing] A [Anas platyrhynchos]
ENSAPLG00020005495	0.415667	13.8923	5.06272	2.6778e-28	4.00669e-26	EXOC3L2	XP_012958497.3 uncharacterized protein LOC101792387 isoform X1 [Anas platyrhynchos]
ENSAPLG00020011279	7.586	93.2723	3.62004	2.83558e-28	4.20034e-26	SOCS1	XP_027324753.1 suppressor of cytokine signaling 1 [Anas platyrhynchos]
ENSAPLG00020015221	0.368333	27.2077	6.20686	3.22186e-28	4.72529e-26	Ptx3	XP_005027616.2 pentraxin-related protein PTX3 [Anas platyrhynchos]
ENSAPLG00020014274	82.8577	433.007	2.38568	3.88184e-28	5.63743e-26	PLAU	XP_005015758.1 urokinase-type plasminogen activator isoform X2 [Anas platyrhynchos]
ENSAPLG00020002126	1.639	25.0617	3.93459	6.0729e-28	8.73377e-26	HNRNPK	XP_032062879.1 heterogeneous nuclear ribonucleoprotein K-like isoform X9 [Aythya fuligula]
ENSAPLG00020018134	2.20733	38.613	4.12871	7.35811e-28	1.04804e-25	CCR7	ACB46528.1 CC chemokine receptor 7 [Anas platyrhynchos]
ENSAPLG00020016341	1.74667	18.3007	3.38922	9.69116e-28	1.36719e-25	Glis1	XP_027318676.2 zinc finger protein GLIS1 isoform X1 [Anas platyrhynchos]
ENSAPLG00020008934	1369.71	249.344	-2.45766	1.11454e-27	1.55011e-25	HEXB	XP_038025769.1 beta-hexosaminidase subunit beta [Anas platyrhynchos]
ENSAPLG00020012290	12.172	97.8467	3.00696	1.1197e-27	1.55011e-25	GPR82	XP_005012542.3 probable G-protein coupled receptor 82 [Anas platyrhynchos]
ENSAPLG00020006615	40.9517	207.759	2.34292	1.15416e-27	1.56937e-25	TAP1	XP_038028428.1 LOW QUALITY PROTEIN: antigen peptide transporter 1 [Anas platyrhynchos]
ENSAPLG00020001675	0.541667	52.102	6.58779	1.1548e-27	1.56937e-25	TFPI	XP_038037811.1 tissue factor pathway inhibitor isoform X1 [Anas platyrhynchos]
ENSAPLG00020003163	11.7283	92.5817	2.98073	1.20126e-27	1.61766e-25	ACKR2	XP_038031463.1 atypical chemokine receptor 2 isoform X1 [Anas platyrhynchos]
MSTRG.4962	5.91167	32.966	2.47934	1.29336e-27	1.71627e-25	CMTR2	XP_027321826.1 taxid=8839 cap-specific mRNA (nucleoside-2'-O-)-methyltransferase 2 [Anas platyrhynchos]
ENSAPLG00020002732	229.735	2778.55	3.59629	1.29766e-27	1.71627e-25	Mmp7	XP_005010554.1 matrilysin [Anas platyrhynchos]
ENSAPLG00020013437	6.45467	68.0297	3.39775	1.55576e-27	2.03942e-25	ch25h	XP_005029482.1 cholesterol 25-hydroxylase [Anas platyrhynchos]
MSTRG.7330	1.615	54.79	5.08431	1.85968e-27	2.41644e-25	--	XP_038021223.1 taxid=8839 uncharacterized protein LOC106016586 [Anas platyrhynchos]
ENSAPLG00020011691	5.80333	47.5967	3.03591	4.07876e-27	5.2538e-25	MARCKSL1	XP_032058316.1 MARCKS-related protein [Aythya fuligula]
ENSAPLG00020000736	33.708	139.505	2.04916	5.79344e-27	7.39813e-25	Pdlim5	XP_027311390.1 PDZ and LIM domain protein 5 isoform X18 [Anas platyrhynchos]
ENSAPLG00020009233	7.35367	50.4387	2.77799	7.33593e-27	9.28778e-25	Rai14	XP_027302037.1 ankycorbin isoform X1 [Anas platyrhynchos]
MSTRG.20534	30.7067	188.418	2.61731	1.47132e-26	1.84701e-24	GBP1	XP_038041848.1 taxid=8839 guanylate-binding protein 1-like [Anas platyrhynchos]
ENSAPLG00020016707	0.930333	13.651	3.87512	2.32602e-26	2.89134e-24	F8	XP_027321330.2 LOW QUALITY PROTEIN: coagulation factor VIII [Anas platyrhynchos]
ENSAPLG00020012329	180.043	914.456	2.34457	2.34228e-26	2.89134e-24	Acod1	XP_005031858.3 cis-aconitate decarboxylase isoform X2 [Anas platyrhynchos]
ENSAPLG00020018210	0.815	51.569	5.98356	2.41106e-26	2.95166e-24	SIGLEC15	XP_038026484.1 sialic acid-binding Ig-like lectin 15 isoform X1 [Anas platyrhynchos]
ENSAPLG00020001855	400.223	2798.09	2.80556	3.88678e-26	4.71925e-24	Ifitm3	XP_027313423.1 dispanin subfamily A member 2b [Anas platyrhynchos]
ENSAPLG00020010831	7.12833	117.912	4.048	7.9134e-26	9.53018e-24	gag	XP_021237243.1 endogenous retrovirus group K member 113 Gag polyprotein-like [Numida meleagris]
ENSAPLG00020003734	0.433333	17.9887	5.37547	8.38094e-26	1.00118e-23	GALNT9	XP_013028922.1 PREDICTED: polypeptide N-acetylgalactosaminyltransferase 9 isoform X3 [Anser cygnoides domesticus]
ENSAPLG00020004238	80.835	364.039	2.17104	1.1403e-25	1.3513e-23	RPA1	XP_027327916.2 replication protein A 70 kDa DNA-binding subunit [Anas platyrhynchos]
ENSAPLG00020011209	39.08	269.858	2.7877	1.60875e-25	1.8913e-23	SAMD9L	XP_005010984.3 sterile alpha motif domain-containing protein 9 [Anas platyrhynchos]
ENSAPLG00020009564	38.7767	245.078	2.65998	1.86852e-25	2.1794e-23	DDX58	XP_038025643.1 antiviral innate immune response receptor RIG-I isoform X1 [Anas platyrhynchos]
ENSAPLG00020010626	17.2027	1.247	-3.7861	2.10698e-25	2.43834e-23	GRHPR	XP_027301971.1 glyoxylate reductase/hydroxypyruvate reductase [Anas platyrhynchos]
ENSAPLG00020015477	9.93267	82.8513	3.06027	2.23996e-25	2.57213e-23	F3	XP_027318151.1 tissue factor [Anas platyrhynchos]
ENSAPLG00020013341	30.881	2.64933	-3.54302	2.3016e-25	2.62259e-23	MSC	XP_035418971.1 musculin [Cygnus atratus]
ENSAPLG00020000083	100.6	790.903	2.97487	2.43779e-25	2.73944e-23	Epsti1	XP_038029022.1 epithelial-stromal interaction protein 1 isoform X2 [Anas platyrhynchos]
ENSAPLG00020003910	314.88	78.8237	-1.9981	2.44114e-25	2.73944e-23	H2-Ab1	ABF47548.1 MHC class II antigen beta chain [Cairina moschata]
ENSAPLG00020010742	177.476	33.039	-2.42538	2.79073e-25	3.1082e-23	CMLKR1	XP_038043317.1 chemokine-like receptor 1 [Anas platyrhynchos]
ENSAPLG00020017265	49.6143	6.884	-2.84944	2.87675e-25	3.16622e-23	Tmem182	XP_038040458.1 transmembrane protein 182 [Anas platyrhynchos]
ENSAPLG00020002260	5.995	37.544	2.64675	2.88557e-25	3.16622e-23	Slc25a37	XP_038022926.1 LOW QUALITY PROTEIN: mitoferrin-1 [Anas platyrhynchos]
ENSAPLG00020018130	2.04667	36.2387	4.14618	3.03253e-25	3.303e-23	MXRA8	XP_032776208.1 matrix remodeling-associated protein 8 isoform X1 [Strigops habroptila]
ENSAPLG00020015334	99.5207	5.63867	-4.14157	4.04055e-25	4.36881e-23	Dapk2	XP_032060429.1 death-associated protein kinase 2-like [Aythya fuligula]
ENSAPLG00020012062	0.626333	18.7653	4.905	7.43879e-25	7.98484e-23	CLDN1	XP_012964010.3 claudin-1 [Anas platyrhynchos]
ENSAPLG00020017498	3.394	29.173	3.10358	1.15329e-24	1.22904e-22	Cyp4b1	XP_012962218.3 cytochrome P450 4B1 [Anas platyrhynchos]
ENSAPLG00020016387	928.539	7855.33	3.08064	1.35791e-24	1.43677e-22	CCL4	XP_038021537.1 C-C motif chemokine 4 homolog isoform X1 [Anas platyrhynchos]
ENSAPLG00020005796	70.6203	12.4963	-2.49858	2.1018e-24	2.20809e-22	Mocs1	XP_027309845.2 molybdenum cofactor biosynthesis protein 1 isoform X2 [Anas platyrhynchos]
ENSAPLG00020014544	6.451	45.01	2.80265	2.12676e-24	2.21857e-22	HIVEP3	XP_012951151.1 transcription factor HIVEP3 isoform X1 [Anas platyrhynchos]
ENSAPLG00020004292	0.423	17.1937	5.34508	2.6203e-24	2.71431e-22	NKX6-1	XP_038034760.1 homeobox protein Nkx-6.1-like isoform X1 [Anas platyrhynchos]
ENSAPLG00020014631	14.5747	101.267	2.79663	3.47248e-24	3.57207e-22	UBC13	XP_038036333.1 ubiquitin/ISG15-conjugating enzyme E2 L6 isoform X2 [Anas platyrhynchos]
ENSAPLG00020008689	110.738	406.701	1.87682	3.69291e-24	3.77262e-22	ATF3	OPJ72303.1 cyclic AMP-dependent transcription factor ATF-3 [Patagioenas fasciata monilis]
ENSAPLG00020002102	14.093	1.76533	-2.99697	5.75825e-24	5.84225e-22	Trpm1	XP_038040638.1 transient receptor potential cation channel subfamily M member 1 isoform X1 [Anas platyrhynchos]
MSTRG.12381	113.18	1269.19	3.48722	6.53251e-24	6.58272e-22	--	XP_038025194.1 taxid=8839 uncharacterized protein LOC119714237 [Anas platyrhynchos]
ENSAPLG00020017707	120.716	21.888	-2.46341	7.10952e-24	7.11576e-22	TM6SF1	XP_027321867.2 transmembrane 6 superfamily member 1 isoform X1 [Anas platyrhynchos]
ENSAPLG00020009878	517.016	99.2287	-2.38138	8.22687e-24	8.17883e-22	ME1	XP_038033095.1 NADP-dependent malic enzyme [Anas platyrhynchos]
ENSAPLG00020001232	20.174	106.076	2.39452	9.65587e-24	9.52932e-22	TRIM13	EOB04545.1 Tripartite motif-containing protein 13, partial [Anas platyrhynchos]
ENSAPLG00020016847	19.2617	106.243	2.46356	9.71395e-24	9.52932e-22	RBM43	XP_027314137.1 RNA-binding protein 43 [Anas platyrhynchos]
ENSAPLG00020010053	51.1233	331.396	2.6965	1.00625e-23	9.80627e-22	Eif2ak2	XP_027309699.2 interferon-induced, double-stranded RNA-activated protein kinase isoform X1 [Anas platyrhynchos]
ENSAPLG00020003087	33.1337	392.618	3.56676	1.61645e-23	1.565e-21	CST7	XP_005017192.3 cystatin-F [Anas platyrhynchos]
MSTRG.11488	49.1097	4.04367	-3.60227	1.75723e-23	1.69025e-21	PLXDC1	XP_038024493.1 taxid=8839 plexin domain-containing protein 1, partial [Anas platyrhynchos]
ENSAPLG00020014587	6.12867	48.1337	2.9734	1.86907e-23	1.78623e-21	Vcp	XP_027304168.1 transitional endoplasmic reticulum ATPase [Anas platyrhynchos]
ENSAPLG00020002813	82.115	20.737	-1.98544	1.90747e-23	1.81124e-21	PARP8	XP_032062036.1 protein mono-ADP-ribosyltransferase PARP8 [Aythya fuligula]
ENSAPLG00020001072	70.5907	376.502	2.41511	2.08465e-23	1.96687e-21	PARP9	XP_038037856.1 protein mono-ADP-ribosyltransferase PARP9 isoform X2 [Anas platyrhynchos]
ENSAPLG00020001556	57.1	12.2457	-2.22122	2.28991e-23	2.14687e-21	CAPN3	XP_005021736.2 calpain-3 isoform X1 [Anas platyrhynchos]
ENSAPLG00020011757	136.823	527.028	1.94557	2.55119e-23	2.37678e-21	ZNFX1	XP_027328667.2 NFX1-type zinc finger-containing protein 1 isoform X1 [Anas platyrhynchos]
ENSAPLG00020010843	0.388333	12.9837	5.06326	2.6315e-23	2.43627e-21	SPINZ	NP_989964.1 spindlin-Z [Gallus gallus]
ENSAPLG00020011243	67.4293	6.817	-3.30617	2.96825e-23	2.73097e-21	ARHGAP20	XP_040400013.1 rho GTPase-activating protein 20 isoform X1 [Cygnus olor]
ENSAPLG00020000865	27.9917	145.593	2.37887	3.31008e-23	3.02668e-21	L3MBTL2	XP_038024433.1 lethal(3)malignant brain tumor-like protein 2 isoform X1 [Anas platyrhynchos]
ENSAPLG00020010833	333.75	91.2657	-1.87062	3.83621e-23	3.47671e-21	BACE2	XP_032037326.1 beta-secretase 2 [Aythya fuligula]
ENSAPLG00020010812	0.462333	14.1973	4.94054	3.84919e-23	3.47671e-21	ERVK-11	XP_013026164.1 PREDICTED: endogenous retrovirus group K member 18 Pol protein-like, partial [Anser cygnoides domesticus]
ENSAPLG00020000340	32.7197	180.855	2.46661	4.88501e-23	4.38555e-21	OTUD4	XP_038033978.1 OTU domain-containing protein 4 isoform X3 [Anas platyrhynchos]
ENSAPLG00020018289	0.519	75.2	7.17885	5.45625e-23	4.83973e-21	IFN	XP_038025742.1 interferon [Anas platyrhynchos]
ENSAPLG00020018290	0.519	75.2	7.17885	5.45625e-23	4.83973e-21	IFN	XP_038025742.1 interferon [Anas platyrhynchos]
ENSAPLG00020017736	8.95267	41.7627	2.22182	5.7421e-23	5.06296e-21	TPCN2	XP_027313880.2 two pore calcium channel protein 2 [Anas platyrhynchos]
ENSAPLG00020016934	56.178	208.189	1.88982	7.21528e-23	6.32425e-21	CEPT1	XP_005026861.1 choline/ethanolaminephosphotransferase 1 isoform X1 [Anas platyrhynchos]
ENSAPLG00020006753	57.9703	8.202	-2.82127	9.04891e-23	7.88479e-21	Sgpp1	XP_032044062.1 sphingosine-1-phosphate phosphatase 1 [Aythya fuligula]
ENSAPLG00020013543	74.9283	12.6767	-2.56334	1.02464e-22	8.87598e-21	AQP9	EOB06926.1 Aquaporin-9, partial [Anas platyrhynchos]
ENSAPLG00020008610	113.943	27.885	-2.03075	1.37868e-22	1.18735e-20	BTN1A1	XP_038043746.1 butyrophilin subfamily 1 member A1-like isoform X2 [Anas platyrhynchos]
ENSAPLG00020008000	10.6647	113.149	3.40731	1.66826e-22	1.42844e-20	GPR160	XP_005019654.2 probable G-protein coupled receptor 160 [Anas platyrhynchos]
ENSAPLG00020008429	0.432667	91.634	7.72648	1.73173e-22	1.47426e-20	IFNK	ANQ45216.1 IFN-kappa [Anas platyrhynchos]
ENSAPLG00020001481	0.364667	50.0817	7.10156	1.84823e-22	1.56445e-20	IL6	XP_027306726.1 interleukin-6 [Anas platyrhynchos]
;GO:2000145//regulation of cell motility;GO:2000147//positive regulation of cell motility;GO:2000377//regulation of reactive oxygen species metabolic process;GO:2000379//positive regulation of reactive oxygen species metabolic process;GO:2000514//regulation of CD4-positive, alpha-beta T cell activation;GO:2000516//positive regulation of CD4-positive, alpha-beta T cell activation;GO:2000551//regul…
ENSAPLG00020006052	68.987	13.932	-2.30792	1.93216e-22	1.6262e-20	Cd207	XP_035427654.1 C-type lectin domain family 4 member F-like isoform X2 [Cygnus atratus]
ENSAPLG00020011417	1.58167	29.618	4.22696	2.61249e-22	2.18637e-20	IL10	AEP93921.1 interleukin-10 isoform 1 [Anas platyrhynchos]
MSTRG.10479	1.667	38.0677	4.51324	2.77113e-22	2.30611e-20	Tnfrsf9	XP_027299216.2 taxid=8839 tumor necrosis factor receptor superfamily member 9 [Anas platyrhynchos]
ENSAPLG00020006621	10.1673	50.0723	2.30007	3.60336e-22	2.98193e-20	PRKCH	XP_027313812.1 protein kinase C eta type isoform X1 [Anas platyrhynchos]
ENSAPLG00020011717	151.029	747.611	2.30746	3.79721e-22	3.12489e-20	GIMAP7	XP_038030417.1 GTPase IMAP family member 7-like isoform X1 [Anas platyrhynchos]
ENSAPLG00020004802	394.583	3529.21	3.16094	4.17229e-22	3.41459e-20	SPP1	XP_005012836.1 osteopontin [Anas platyrhynchos]
ENSAPLG00020016821	57.5323	10.6157	-2.43818	4.2738e-22	3.4718e-20	MBOAT1	XP_027307023.1 lysophospholipid acyltransferase 1 isoform X2 [Anas platyrhynchos]
ENSAPLG00020008855	56.885	615.503	3.43565	4.28907e-22	3.4718e-20	AVD	XP_027302638.1 avidin-like [Anas platyrhynchos]
MSTRG.7277	1.05133	26.0623	4.63167	4.57326e-22	3.68172e-20	--	EOB06655.1 taxid=8839 hypothetical protein Anapl_03159 [Anas platyrhynchos]
MSTRG.15638	46.911	12.7257	-1.88219	5.61315e-22	4.49446e-20	wrn	XP_027311907.2 taxid=8839 Werner syndrome ATP-dependent helicase isoform X1 [Anas platyrhynchos]
ENSAPLG00020014176	66.2233	289.172	2.12651	7.59464e-22	6.04836e-20	SLC11A2	EOA94604.1 Natural resistance-associated macrophage protein 2, partial [Anas platyrhynchos]
ENSAPLG00020003715	138.319	26.775	-2.36904	9.17536e-22	7.26816e-20	ADAP1	XP_027324695.1 arf-GAP with dual PH domain-containing protein 1 [Anas platyrhynchos]
ENSAPLG00020013909	112.907	396.032	1.81048	9.78523e-22	7.71003e-20	TUBB6	XP_027307871.1 tubulin beta-6 chain [Anas platyrhynchos]
ENSAPLG00020015576	26.6237	207.295	2.9609	1.07479e-21	8.42374e-20	--	XP_005017687.1 T-cell surface antigen CD2 isoform X1 [Anas platyrhynchos]
ENSAPLG00020000454	68.075	14.991	-2.18303	1.33096e-21	1.03766e-19	Abcc1	EOA93802.1 Multidrug resistance-associated protein 1, partial [Anas platyrhynchos]
ENSAPLG00020005170	32.7	154.502	2.24027	1.65366e-21	1.2825e-19	CD1D	XP_005009885.2 T-cell surface glycoprotein CD1b-3 [Anas platyrhynchos]
ENSAPLG00020003979	131.127	33.6527	-1.96217	2.0311e-21	1.56702e-19	LAPTM4B	XP_035402021.1 lysosomal-associated transmembrane protein 4B [Cygnus atratus]
ENSAPLG00020014388	8.22533	42.879	2.38213	3.09622e-21	2.37639e-19	GALNT6	XP_027301260.1 polypeptide N-acetylgalactosaminyltransferase 6 [Anas platyrhynchos]
ENSAPLG00020017994	0.744	70.9343	6.57504	3.44245e-21	2.62851e-19	TIMP3	XP_005011572.1 metalloproteinase inhibitor 3 [Anas platyrhynchos]
MSTRG.10435	1.446	29.7223	4.36141	4.09929e-21	3.11399e-19	--	XP_035413373.1 taxid=8868 matrix remodeling-associated protein 8 isoform X2 [Cygnus atratus]
ENSAPLG00020003263	95.6193	13.7693	-2.79584	5.95677e-21	4.50192e-19	H2-Ab1	XP_032061025.1 class II histocompatibility antigen, B-L beta chain-like [Aythya fuligula]
ENSAPLG00020007343	6.768	50.134	2.88899	6.26321e-21	4.70949e-19	TGL2	XP_038022183.1 protein-glutamine gamma-glutamyltransferase 2 [Anas platyrhynchos]
ENSAPLG00020008491	24.0003	2.467	-3.28222	7.32327e-21	5.47877e-19	PTPN14	XP_005014774.1 tyrosine-protein phosphatase non-receptor type 14 [Anas platyrhynchos]
ENSAPLG00020003318	57.8033	340.953	2.56035	8.77851e-21	6.53448e-19	gatd3a	XP_013054520.1 PREDICTED: ES1 protein homolog, mitochondrial-like [Anser cygnoides domesticus]
ENSAPLG00020012409	2.091	30.2077	3.85265	9.02849e-21	6.68695e-19	CAMK1G	EOB03064.1 Calcium/calmodulin-dependent protein kinase type 1G, partial [Anas platyrhynchos]
ENSAPLG00020003799	48.0217	165.513	1.78519	9.36395e-21	6.9009e-19	IP6K2	XP_027323323.1 inositol hexakisphosphate kinase 2 [Anas platyrhynchos]
ENSAPLG00020014048	0.242333	25.2947	6.7057	1.03419e-20	7.58391e-19	APOBEC1	XP_027305667.1 C->U-editing enzyme APOBEC-1 isoform X1 [Anas platyrhynchos]
MSTRG.1370	41.837	12.3467	-1.76066	1.05095e-20	7.66881e-19	--	XP_005012717.1 taxid=8839 NKG2-A/NKG2-B type II integral membrane protein-like isoform X1 [Anas platyrhynchos]
ENSAPLG00020001074	0.156333	14.445	6.5298	1.49531e-20	1.08527e-18	Upp1	XP_005029385.1 uridine phosphorylase 1 isoform X2 [Anas platyrhynchos]
ENSAPLG00020003730	80.9223	19.8543	-2.02708	1.50193e-20	1.08527e-18	PSD3	XP_038025797.1 PH and SEC7 domain-containing protein 3 isoform X3 [Anas platyrhynchos]
ENSAPLG00020006507	55.6217	12.3353	-2.17285	2.19334e-20	1.57718e-18	TTLL12	XP_027305846.1 tubulin--tyrosine ligase-like protein 12 isoform X1 [Anas platyrhynchos]
ENSAPLG00020010649	25.812	4.235	-2.60761	2.60797e-20	1.86627e-18	Cdc42bpa	XP_027309463.1 serine/threonine-protein kinase MRCK alpha isoform X4 [Anas platyrhynchos]
ENSAPLG00020005765	5.73433	35.464	2.62866	2.72514e-20	1.94075e-18	NCKAP1	XP_027317208.1 nck-associated protein 1 isoform X1 [Anas platyrhynchos]
ENSAPLG00020000481	24.8833	2.786	-3.15891	2.79553e-20	1.98135e-18	Cacnb2	XP_027306465.1 voltage-dependent L-type calcium channel subunit beta-2 isoform X2 [Anas platyrhynchos]
ENSAPLG00020004259	6.752	40.8313	2.59629	3.48456e-20	2.45794e-18	ETV7	XP_013055808.1 PREDICTED: transcription factor ETV7 isoform X1 [Anser cygnoides domesticus]
ENSAPLG00020007742	19.132	0.282	-6.08415	3.78026e-20	2.65389e-18	Havcr1	XP_038042462.1 LOW QUALITY PROTEIN: T-cell immunoglobulin and mucin domain-containing protein 4 [Anas platyrhynchos]
ENSAPLG00020016838	17.6303	99.9213	2.50273	5.3028e-20	3.70521e-18	NRSN1	XP_013040308.1 PREDICTED: neurensin-1 isoform X2 [Anser cygnoides domesticus]
ENSAPLG00020015267	7.762	114.077	3.87743	5.33177e-20	3.70796e-18	--	NP_001297745.1 interleukin-2 receptor subunit alpha-like precursor [Anas platyrhynchos]
ENSAPLG00020009021	124.6	21.6707	-2.52349	5.96507e-20	4.129e-18	Chst5	XP_032051388.1 carbohydrate sulfotransferase 5-like [Aythya fuligula]
ENSAPLG00020008599	76.1567	326.923	2.10191	6.072e-20	4.18346e-18	OGFR	XP_027328879.2 opioid growth factor receptor isoform X1 [Anas platyrhynchos]
MSTRG.7117	12.316	111.671	3.18065	6.6188e-20	4.53908e-18	--	XP_038021504.1 taxid=8839 uncharacterized protein LOC101791571 isoform X1 [Anas platyrhynchos]
ENSAPLG00020008928	162.002	591.068	1.86732	9.17021e-20	6.25983e-18	ITGB1	XP_027306336.1 integrin beta-1 isoform X2 [Anas platyrhynchos]
ENSAPLG00020009369	28.6507	0.779333	-5.20018	1.13567e-19	7.7168e-18	tmem116	XP_038043237.1 transmembrane protein 116 [Anas platyrhynchos]
MSTRG.10848	0.231	17.301	6.22682	1.18443e-19	8.01138e-18	ERV3-1	XP_029897243.1 taxid=223781 ubiquinone biosynthesis monooxygenase COQ6, mitochondrial isoform X2 [Aquila chrysaetos chrysaetos]
ENSAPLG00020007492	2.10167	24.0843	3.51849	1.20615e-19	8.12123e-18	--	XP_012957727.2 tumor necrosis factor receptor superfamily member 4 isoform X1 [Anas platyrhynchos]
ENSAPLG00020005780	26.4993	100.494	1.92308	1.4973e-19	1.0036e-17	PRDM1	XP_038033042.1 PR domain zinc finger protein 1 isoform X1 [Anas platyrhynchos]
ENSAPLG00020008029	62.2157	14.288	-2.12247	1.7573e-19	1.17256e-17	Pdk1	XP_035188365.1 pyruvate dehydrogenase (acetyl-transferring) kinase isozyme 1, mitochondrial [Oxyura jamaicensis]
ENSAPLG00020008828	0.680333	78.4803	6.84995	2.07846e-19	1.38064e-17	--	EOA95585.1 hypothetical protein Anapl_12933, partial [Anas platyrhynchos]
ENSAPLG00020015265	27.9677	148.045	2.4042	2.44126e-19	1.60973e-17	--	XP_005025829.2 endonuclease domain-containing 1 protein [Anas platyrhynchos]
ENSAPLG00020014653	784.409	183.71	-2.09417	2.44508e-19	1.60973e-17	NCOA4	XP_027316461.1 nuclear receptor coactivator 4 isoform X1 [Anas platyrhynchos]
ENSAPLG00020000597	35.797	2.33733	-3.9369	3.20575e-19	2.10119e-17	STIMATE	XP_027316675.1 store-operated calcium entry regulator STIMATE [Anas platyrhynchos]
ENSAPLG00020007956	7.381	81.1933	3.45947	3.3476e-19	2.18449e-17	CTSG	XP_012954946.2 mast cell protease 1A [Anas platyrhynchos]
ENSAPLG00020016166	9.45933	72.0753	2.9297	3.74874e-19	2.43553e-17	STOML1	XP_021129266.2 stomatin-like protein 1 isoform X1 [Anas platyrhynchos]
ENSAPLG00020011705	363.018	1357.65	1.903	5.00476e-19	3.23736e-17	GIMAP7	XP_038030050.1 GTPase IMAP family member 8-like [Anas platyrhynchos]
ENSAPLG00020016577	1.53267	8.71233	2.50702	5.18611e-19	3.34008e-17	AHNAK2	XP_038036398.1 protein AHNAK2 isoform X2 [Anas platyrhynchos]
ENSAPLG00020006820	53.1177	10.912	-2.28328	5.37886e-19	3.44922e-17	Lama3	XP_027307737.2 LOW QUALITY PROTEIN: laminin subunit alpha-3 [Anas platyrhynchos]
ENSAPLG00020016068	1.792	33.829	4.23862	5.83351e-19	3.72464e-17	ST8SIA6	XP_027306486.2 alpha-2,8-sialyltransferase 8F isoform X1 [Anas platyrhynchos]
ENSAPLG00020015181	11.033	44.082	1.99836	9.95883e-19	6.33133e-17	NET1	XP_038042636.1 neuroepithelial cell-transforming gene 1 protein isoform X2 [Anas platyrhynchos]
ENSAPLG00020005399	4.293	28.6587	2.73891	1.2197e-18	7.72112e-17	--	XP_038021136.1 uncharacterized protein LOC119713125 [Anas platyrhynchos]
ENSAPLG00020017845	92.7327	9.92767	-3.22355	1.56225e-18	9.84751e-17	MLPH	XP_038038182.1 melanophilin isoform X4 [Anas platyrhynchos]
ENSAPLG00020015073	28.742	0.132333	-7.76284	2.7529e-18	1.72791e-16	KBP	NP_001297319.1 probable glutamate receptor precursor [Anas platyrhynchos]
ENSAPLG00020010760	6.449	67.615	3.3902	3.48194e-18	2.17628e-16	Bcl2l15	XP_005011784.1 bcl-2-like protein 15 [Anas platyrhynchos]
ENSAPLG00020000192	29.2733	118.691	2.01956	4.11911e-18	2.56371e-16	NFKB1	XP_032041860.1 nuclear factor NF-kappa-B p105 subunit isoform X3 [Aythya fuligula]
ENSAPLG00020006742	72.599	26.1593	-1.47262	4.31537e-18	2.67463e-16	FASN	XP_027327035.1 fatty acid synthase isoform X1 [Anas platyrhynchos]
ENSAPLG00020014286	13.2213	55.4887	2.06933	5.98059e-18	3.69127e-16	SULT1B1	XP_027311829.2 sulfotransferase family cytosolic 1B member 1 [Anas platyrhynchos]
ENSAPLG00020016938	79.951	348.777	2.12512	6.18025e-18	3.79867e-16	Dram2	XP_038024113.1 DNA damage-regulated autophagy modulator protein 2 [Anas platyrhynchos]
ENSAPLG00020001096	60.3523	213.59	1.82336	6.31291e-18	3.86418e-16	PARP14	XP_038038197.1 protein mono-ADP-ribosyltransferase PARP14 isoform X2 [Anas platyrhynchos]
MSTRG.2109	2.614	11.482	2.13504	8.13016e-18	4.95605e-16	--	-
ENSAPLG00020016394	122.774	42.0237	-1.54674	8.44978e-18	5.12978e-16	DHCR24	XP_027318219.1 delta(24)-sterol reductase [Anas platyrhynchos]
ENSAPLG00020010289	46.0417	228.774	2.31291	8.79561e-18	5.31794e-16	ACOT7	XP_027299210.2 cytosolic acyl coenzyme A thioester hydrolase [Anas platyrhynchos]
ENSAPLG00020003024	88.6133	375.799	2.08436	1.00481e-17	6.05052e-16	GBP1	XP_040399658.1 guanylate-binding protein 1-like isoform X2 [Cygnus olor]
MSTRG.11335	3.574	15.183	2.08685	1.05282e-17	6.31393e-16	--	EOA97245.1 taxid=8839 hypothetical protein Anapl_10831 [Anas platyrhynchos]
ENSAPLG00020001669	9.19033	66.5403	2.85604	1.1106e-17	6.63361e-16	Ankrd33b	XP_027307535.1 ankyrin repeat domain-containing protein 33B [Anas platyrhynchos]
ENSAPLG00020003605	2.166	13.219	2.60951	1.16545e-17	6.93326e-16	kdrl	XP_027321316.2 vascular endothelial growth factor receptor kdr-like isoform X2 [Anas platyrhynchos]
ENSAPLG00020001934	10.4163	1.132	-3.2019	1.45735e-17	8.63507e-16	TBC1D8	XP_038029159.1 LOW QUALITY PROTEIN: TBC1 domain family member 8 [Anas platyrhynchos]
ENSAPLG00020003777	0.883333	18.896	4.41898	1.48815e-17	8.78248e-16	Adamts13	XP_005013323.1 A disintegrin and metalloproteinase with thrombospondin motifs 13 isoform X3 [Anas platyrhynchos]
ENSAPLG00020002101	0.001	34.6667	15.0813	1.56391e-17	9.19296e-16	RPL37	XP_027304095.1 60S ribosomal protein L37 isoform X2 [Anas platyrhynchos]
ENSAPLG00020014626	4.64033	0.248667	-4.22194	1.68486e-17	9.86475e-16	PREX2	XP_027308120.1 phosphatidylinositol 3,4,5-trisphosphate-dependent Rac exchanger 2 protein isoform X1 [Anas platyrhynchos]
ENSAPLG00020002530	325.342	90.8603	-1.84024	2.26229e-17	1.31934e-15	Alg9	XP_032057825.1 alpha-1,2-mannosyltransferase ALG9 isoform X2 [Aythya fuligula]
ENSAPLG00020010474	62.8863	252.446	2.00516	2.38909e-17	1.38783e-15	RNF19B	KAF1596179.1 E3 ubiquitin-protein ligase RNF19B, partial [Eudyptes moseleyi]
ENSAPLG00020012582	52.9203	12.6097	-2.06929	2.44681e-17	1.4158e-15	id3-a	XP_027299760.2 LOW QUALITY PROTEIN: DNA-binding protein inhibitor ID-3 [Anas platyrhynchos]
ENSAPLG00020016474	1.62167	14.9397	3.2036	2.98854e-17	1.72254e-15	SLFN13	XP_012963096.3 schlafen family member 13 [Anas platyrhynchos]
ENSAPLG00020016763	157.385	25.7557	-2.61133	3.41734e-17	1.95712e-15	AOAH	XP_027307238.1 acyloxyacyl hydrolase isoform X1 [Anas platyrhynchos]
ENSAPLG00020001374	2.38	29.4933	3.63136	3.42195e-17	1.95712e-15	Blk	XP_005030656.1 tyrosine-protein kinase Blk isoform X1 [Anas platyrhynchos]
ENSAPLG00020000339	28.0897	99.2157	1.82053	3.56791e-17	2.03275e-15	UXS1	XP_027301025.1 UDP-glucuronic acid decarboxylase 1 isoform X1 [Anas platyrhynchos]
ENSAPLG00020014542	8.566	75.355	3.13701	3.79315e-17	2.1528e-15	SERINC2	XP_038023340.1 serine incorporator 2 isoform X1 [Anas platyrhynchos]
ENSAPLG00020010824	24.0117	86.785	1.85371	4.09341e-17	2.31434e-15	IKBKE	XP_027300925.1 LOW QUALITY PROTEIN: inhibitor of nuclear factor kappa-B kinase subunit epsilon [Anas platyrhynchos]
ENSAPLG00020015873	11.193	61.5233	2.45854	7.66603e-17	4.31775e-15	IL17REL	XP_038029117.1 putative interleukin-17 receptor E-like isoform X2 [Anas platyrhynchos]
ENSAPLG00020002724	140.825	41.5003	-1.76271	7.76691e-17	4.358e-15	SETD7	XP_027312539.1 histone-lysine N-methyltransferase SETD7 [Anas platyrhynchos]
ENSAPLG00020014491	0.001	4.973	12.2799	8.52108e-17	4.76312e-15	NIPBL	XP_038025372.1 nipped-B-like protein isoform X1 [Anas platyrhynchos]
ENSAPLG00020003079	198.361	67.7803	-1.54919	1.01204e-16	5.63587e-15	SELENON	XP_038023084.1 selenoprotein N isoform X1 [Anas platyrhynchos]
ENSAPLG00020017970	30.2797	198.715	2.71428	1.16343e-16	6.45465e-15	IFIH1	NP_001297740.1 interferon-induced helicase C domain-containing protein 1 [Anas platyrhynchos]
ENSAPLG00020013280	13.1603	1.293	-3.3474	1.25847e-16	6.95588e-15	TRAV1-2	XP_038028231.1 uncharacterized protein LOC113841485 [Anas platyrhynchos]
ENSAPLG00020003107	51.6237	13.9103	-1.89188	1.42418e-16	7.8425e-15	MAN1C1	XP_038023082.1 mannosyl-oligosaccharide 1,2-alpha-mannosidase IC isoform X1 [Anas platyrhynchos]
MSTRG.10450	4.87533	31.4613	2.69001	1.43235e-16	7.85829e-15	Arhgef7	XP_013049720.1 taxid=8845 uncharacterized protein LOC106044313 isoform X1 [Anser cygnoides]
ENSAPLG00020004552	0.799667	10.708	3.74315	1.46033e-16	7.98221e-15	Arhgap24	XP_038033916.1 rho GTPase-activating protein 24 isoform X1 [Anas platyrhynchos]
ENSAPLG00020014762	7.78867	1.18433	-2.7173	1.48784e-16	8.1027e-15	COL19A1	XP_005009779.3 collagen alpha-1(XIX) chain isoform X1 [Anas platyrhynchos]
ENSAPLG00020018211	0.341333	4.79133	3.81117	1.58199e-16	8.5839e-15	KIAA1549	XP_027304869.2 LOW QUALITY PROTEIN: UPF0606 protein KIAA1549 homolog [Anas platyrhynchos]
ENSAPLG00020001692	239.482	71.9653	-1.73455	1.70723e-16	9.22963e-15	EPS15	XP_027318295.1 epidermal growth factor receptor substrate 15 isoform X2 [Anas platyrhynchos]
ENSAPLG00020017357	56.9317	252.294	2.1478	1.99715e-16	1.07577e-14	ERO1A	EOA96356.1 ERO1-like protein alpha, partial [Anas platyrhynchos]
ENSAPLG00020003539	1.45033	7.7	2.40847	2.73279e-16	1.4667e-14	ZNF462	XP_038025894.1 zinc finger protein 462 isoform X1 [Anas platyrhynchos]
ENSAPLG00020007477	13.5607	43.442	1.67966	2.84053e-16	1.51902e-14	PLA2G6	XP_038024887.1 LOW QUALITY PROTEIN: 85/88 kDa calcium-independent phospholipase A2 [Anas platyrhynchos]
ENSAPLG00020000073	75.3103	22.925	-1.71593	3.13853e-16	1.67234e-14	Il1r1	XP_012949273.2 interleukin-1 receptor type 1 isoform X3 [Anas platyrhynchos]
MSTRG.14138	72.9367	9.75733	-2.90209	3.41086e-16	1.81094e-14	si:dkeyp-59a8.4	XP_027309486.1 taxid=8839 protein stum homolog isoform X6 [Anas platyrhynchos]
MSTRG.12677	15.0267	72.097	2.26241	4.02269e-16	2.12815e-14	--	EOB04958.1 taxid=8839 hypothetical protein Anapl_03341, partial [Anas platyrhynchos]
MSTRG.14723	9.96733	44.82	2.16886	4.73251e-16	2.49476e-14	STAT2	QCY58619.1 taxid=8839 signal transducer and activator of transcription 2 [Anas platyrhynchos]
ENSAPLG00020017776	20.6733	92.0407	2.1545	5.2695e-16	2.76798e-14	BCL2A1	XP_005027205.1 bcl-2-related protein A1 [Anas platyrhynchos]
ENSAPLG00020011496	5.35167	28.74	2.425	5.47284e-16	2.86464e-14	ANKH	XP_040406241.1 progressive ankylosis protein homolog [Cygnus olor]
ENSAPLG00020003905	4.85633	20.8057	2.09904	5.73861e-16	2.99317e-14	TRPC3	XP_035181097.1 short transient receptor potential channel 3 isoform X1 [Oxyura jamaicensis]
ENSAPLG00020002259	166.414	604.725	1.8615	5.80811e-16	3.01879e-14	MFSD14B	XP_038026481.1 hippocampus abundant transcript-like protein 1 [Anas platyrhynchos]
ENSAPLG00020018229	82.7973	27.8163	-1.57365	6.00953e-16	3.11256e-14	PIK3C3	XP_038026591.1 phosphatidylinositol 3-kinase catalytic subunit type 3 isoform X1 [Anas platyrhynchos]
ENSAPLG00020004278	0.608667	13.8777	4.51097	6.04907e-16	3.12212e-14	ALDH3B1	XP_032045003.1 aldehyde dehydrogenase family 3 member B1 isoform X1 [Aythya fuligula]
ENSAPLG00020000963	0.782	11.793	3.91462	6.17739e-16	3.17728e-14	Ank3	XP_032047268.1 ankyrin-3 isoform X19 [Aythya fuligula]
ENSAPLG00020008496	422.412	134.628	-1.64968	7.82086e-16	4.00866e-14	MROH1	XP_038030604.1 maestro heat-like repeat-containing protein family member 1 isoform X4 [Anas platyrhynchos]
ENSAPLG00020005246	4.51933	32.824	2.86057	9.06054e-16	4.62806e-14	JAG1	XP_027309157.1 protein jagged-1 isoform X2 [Anas platyrhynchos]
MSTRG.2122	18.3167	68.2893	1.8985	1.0899e-15	5.54466e-14	--	XP_035401957.1 taxid=8868 uncharacterized protein LOC118247801 [Cygnus atratus]
ENSAPLG00020011978	46.561	13.4393	-1.79266	1.09299e-15	5.54466e-14	Txndc5	XP_027307403.1 thioredoxin domain-containing protein 5 isoform X1 [Anas platyrhynchos]
ENSAPLG00020004804	26.3267	3.745	-2.81349	1.21647e-15	6.15001e-14	EDNRA	XP_005014739.1 endothelin-1 receptor [Anas platyrhynchos]
ENSAPLG00020001070	78.409	13.022	-2.59007	1.25185e-15	6.30737e-14	Pyurf	XP_038034556.1 protein preY, mitochondrial [Anas platyrhynchos]
ENSAPLG00020016454	6.46767	25.7267	1.99195	1.28092e-15	6.43196e-14	TES	XP_027313424.1 testin [Anas platyrhynchos]
ENSAPLG00020013048	3.561	31.796	3.15849	1.29871e-15	6.49928e-14	HELZ2	EOA95357.1 Peroxisomal proliferator-activated receptor A-interacting complex 285 kDa protein, partial [Anas platyrhynchos]
ENSAPLG00020007501	246.095	48.2187	-2.35155	1.31856e-15	6.57635e-14	PEBP1	XP_027326080.1 phosphatidylethanolamine-binding protein 1 [Anas platyrhynchos]
ENSAPLG00020015624	58.2843	221.852	1.92842	1.40787e-15	6.99826e-14	UGDH	XP_027313029.2 UDP-glucose 6-dehydrogenase [Anas platyrhynchos]
ENSAPLG00020001603	414.54	1588.54	1.93812	1.62005e-15	8.02602e-14	LY6E	XP_027308579.1 lymphocyte antigen 6E [Anas platyrhynchos]
ENSAPLG00020017669	0.0613333	10.124	7.36689	1.86354e-15	9.20156e-14	GFPT2	XP_038042456.1 glutamine--fructose-6-phosphate aminotransferase [isomerizing] 2 isoform X3 [Anas platyrhynchos]
ENSAPLG00020005349	75.6353	23.3047	-1.69844	2.08915e-15	1.02813e-13	SERINC5	XP_038026005.1 serine incorporator 5 isoform X2 [Anas platyrhynchos]
ENSAPLG00020010134	23.81	160.17	2.74996	3.02782e-15	1.48513e-13	SULF2	XP_012951995.1 extracellular sulfatase Sulf-2 [Anas platyrhynchos]
ENSAPLG00020008119	0.987	19.2	4.28191	3.0452e-15	1.48873e-13	ADM	XP_027317696.2 pro-adrenomedullin [Anas platyrhynchos]
MSTRG.1798	0.236333	3.665	3.95492	3.68576e-15	1.79596e-13	--	KAK4821027.1 taxid=33587 hypothetical protein QYF61_012113 [Mycteria americana]
ENSAPLG00020010820	0.001	66.7323	16.0261	4.04329e-15	1.96372e-13	--	BAA94872.1 Wpkci, partial [Anas platyrhynchos]
ENSAPLG00020017470	62.36	186.336	1.57922	4.29851e-15	2.08085e-13	PDE4B	XP_027319612.1 cAMP-specific 3',5'-cyclic phosphodiesterase 4B isoform X1 [Anas platyrhynchos]
ENSAPLG00020000483	276.928	786.138	1.50527	4.9147e-15	2.37138e-13	CD99	XP_027303060.1 CD99 antigen isoform X1 [Anas platyrhynchos]
ENSAPLG00020012078	1.02167	23.1307	4.50081	5.04628e-15	2.42696e-13	OSTN	XP_038039780.1 osteocrin isoform X1 [Anas platyrhynchos]
ENSAPLG00020013094	16.2663	75.3417	2.21156	6.50839e-15	3.12003e-13	CCDC28A	OXB68442.1 hypothetical protein ASZ78_010063 [Callipepla squamata]
MSTRG.8584	10.6253	1.07767	-3.30153	6.62581e-15	3.16607e-13	--	-
ENSAPLG00020011570	733.308	260.596	-1.4926	8.0339e-15	3.82657e-13	CYBB	XP_012949989.1 cytochrome b-245 heavy chain [Anas platyrhynchos]
ENSAPLG00020000557	9.60533	83.6293	3.1221	8.66534e-15	4.11409e-13	SAA1	P02740.2 RecName: Full=Serum amyloid A protein; Short=SAA; Flags: Precursor [Anas platyrhynchos]
ENSAPLG00020005662	0.366	10.9183	4.89877	9.41395e-15	4.45523e-13	Rrad	XP_027322757.1 GTP-binding protein RAD [Anas platyrhynchos]
ENSAPLG00020015122	0.545667	7.09467	3.70064	9.76156e-15	4.60503e-13	TMCC2	XP_038024233.1 transmembrane and coiled-coil domains protein 2 isoform X4 [Anas platyrhynchos]
ENSAPLG00020013462	3.07067	35.692	3.53898	1.10569e-14	5.19953e-13	Vstm4	EOA99373.1 Uncharacterized protein C10orf72, partial [Anas platyrhynchos]
ENSAPLG00020018001	0.208	10.5297	5.66173	1.1122e-14	5.21362e-13	EPCAM	XP_027309425.1 epithelial cell adhesion molecule [Anas platyrhynchos]
ENSAPLG00020000658	52.2207	11.939	-2.12894	1.23647e-14	5.77787e-13	MROH1	XP_038030603.1 maestro heat-like repeat-containing protein family member 1 isoform X3 [Anas platyrhynchos]
MSTRG.17164	28.7717	5.46467	-2.39644	1.38936e-14	6.47189e-13	Sergef	EOA97796.1 taxid=8839 PDZ and LIM domain protein 5, partial [Anas platyrhynchos]
ENSAPLG00020014764	7.104	0.223333	-4.99136	1.40158e-14	6.50834e-13	TRIM71	XP_041263817.1 LOW QUALITY PROTEIN: E3 ubiquitin-protein ligase TRIM71 [Onychostruthus taczanowskii]
ENSAPLG00020012302	7.71	37.6087	2.28626	1.44995e-14	6.7119e-13	Slbp	XP_027311500.1 histone RNA hairpin-binding protein isoform X3 [Anas platyrhynchos]
ENSAPLG00020015803	81.3837	30.642	-1.40923	1.4769e-14	6.81536e-13	Tbc1d2	XP_038026383.1 TBC1 domain family member 2A [Anas platyrhynchos]
ENSAPLG00020010800	94.6283	21.0737	-2.16683	1.98877e-14	9.14896e-13	PLPP5	XP_032059916.1 phospholipid phosphatase 5 [Aythya fuligula]
ENSAPLG00020000470	74.7193	234.614	1.65074	2.01362e-14	9.23459e-13	NUB1	XP_027306188.1 NEDD8 ultimate buster 1 [Anas platyrhynchos]
ENSAPLG00020008822	49.5577	11.5073	-2.10655	2.0613e-14	9.42409e-13	MARVELD3	XP_038041578.1 MARVEL domain-containing protein 3 [Anas platyrhynchos]
ENSAPLG00020010049	105.332	34.521	-1.6094	2.11586e-14	9.63331e-13	UCK1	XP_038044057.1 LOW QUALITY PROTEIN: uridine-cytidine kinase 1 [Anas platyrhynchos]
ENSAPLG00020005855	72.268	295.874	2.03356	2.12007e-14	9.63331e-13	NFKBIZ	XP_027305324.2 NF-kappa-B inhibitor zeta isoform X1 [Anas platyrhynchos]
ENSAPLG00020012129	158.519	656.675	2.05052	2.14538e-14	9.71851e-13	Plek	XP_005025221.1 pleckstrin [Anas platyrhynchos]
ENSAPLG00020016608	110.631	600.922	2.44143	2.37357e-14	1.07194e-12	RIPK2	XP_005025777.2 receptor-interacting serine/threonine-protein kinase 2 isoform X1 [Anas platyrhynchos]
ENSAPLG00020009815	0.143333	5.19633	5.18005	2.41597e-14	1.08777e-12	ITGA10	XP_038028653.1 LOW QUALITY PROTEIN: integrin alpha-10 [Anas platyrhynchos]
ENSAPLG00020002949	147.126	39.137	-1.91045	2.59757e-14	1.16599e-12	TTYH2	XP_027327302.2 protein tweety homolog 2 [Anas platyrhynchos]
ENSAPLG00020010811	0.001	63.0243	15.9436	2.64095e-14	1.18189e-12	--	XP_038025341.1 histidine triad nucleotide-binding protein 1-like isoform X3 [Anas platyrhynchos]
ENSAPLG00020008450	224.886	45.8447	-2.29437	2.69759e-14	1.2036e-12	CRYL1	XP_027324754.1 lambda-crystallin homolog isoform X1 [Anas platyrhynchos]
ENSAPLG00020009255	5.703	20.789	1.86603	2.71045e-14	1.2057e-12	TIAM2	XP_032041390.1 T-lymphoma invasion and metastasis-inducing protein 2 [Aythya fuligula]
ENSAPLG00020002725	858.556	2869.75	1.74094	2.72191e-14	1.20718e-12	CLEC2D	AAT73605.1 AICL-like 2 [Anas platyrhynchos]
MSTRG.18456	55.8793	271.485	2.28048	2.86186e-14	1.26545e-12	NMI	XP_032045964.1 taxid=219594 N-myc-interactor [Aythya fuligula]
ENSAPLG00020008282	8.71333	0.74	-3.55763	2.8911e-14	1.27458e-12	MLLT3	XP_038026892.1 protein AF-9 isoform X1 [Anas platyrhynchos]
ENSAPLG00020017099	4.09867	20.6633	2.33385	2.95404e-14	1.29846e-12	GRAMD1B	XP_040389959.1 protein Aster-B isoform X1 [Cygnus olor]
ENSAPLG00020012468	11.8983	1.08367	-3.45677	2.97929e-14	1.30569e-12	NTN4	XP_005025165.1 netrin-4 [Anas platyrhynchos]
ENSAPLG00020004326	59.0933	14.4053	-2.03639	3.53342e-14	1.54397e-12	TBC1D16	XP_038021400.1 TBC1 domain family member 16 isoform X1 [Anas platyrhynchos]
ENSAPLG00020016093	1.69967	17.648	3.37618	3.97493e-14	1.73178e-12	LAT2	EOA95839.1 Linker for activation of T-cells family member 2 [Anas platyrhynchos]
ENSAPLG00020005897	12.8133	56.0213	2.12833	4.32072e-14	1.87691e-12	Traf3	XP_005020759.1 TNF receptor-associated factor 3 isoform X1 [Anas platyrhynchos]
ENSAPLG00020003917	104.942	26.6903	-1.9752	4.42143e-14	1.91505e-12	RIDA	XP_027308306.2 2-iminobutanoate/2-iminopropanoate deaminase [Anas platyrhynchos]
ENSAPLG00020006788	127.647	716.443	2.48869	5.76045e-14	2.48678e-12	SERPINE2	XP_035400535.1 glia-derived nexin isoform X5 [Cygnus atratus]
ENSAPLG00020005949	0.247	10.2283	5.37192	5.77502e-14	2.48678e-12	SLC18A2	XP_032047681.1 synaptic vesicular amine transporter [Aythya fuligula]
ENSAPLG00020007715	141.899	47.617	-1.57532	6.28531e-14	2.69867e-12	TTL	XP_038032901.1 tubulin--tyrosine ligase [Anas platyrhynchos]
ENSAPLG00020008241	1.76033	32.2173	4.19392	6.45227e-14	2.76236e-12	DUSP5	XP_032047195.1 dual specificity protein phosphatase 5 [Aythya fuligula]
ENSAPLG00020013036	82.8097	574.276	2.79387	6.75846e-14	2.8851e-12	TNFRSF6B	XP_027328873.2 tumor necrosis factor receptor superfamily member 6B isoform X2 [Anas platyrhynchos]
ENSAPLG00020002744	9.47133	45.934	2.27792	7.12836e-14	3.03427e-12	MAMLD1	XP_005020545.2 mastermind-like domain-containing protein 1 isoform X1 [Anas platyrhynchos]
ENSAPLG00020017599	63.526	19.671	-1.69128	7.37367e-14	3.12969e-12	KLHL13	XP_005031236.1 kelch-like protein 13 isoform X2 [Anas platyrhynchos]
ENSAPLG00020014552	0.0193333	10.907	9.13995	7.42841e-14	3.14392e-12	UBAP2	XP_038025567.1 ubiquitin-associated protein 2 isoform X2 [Anas platyrhynchos]
ENSAPLG00020011931	13.3517	52.5987	1.97801	8.6267e-14	3.64066e-12	Hip1r	XP_027325605.2 huntingtin-interacting protein 1-related protein [Anas platyrhynchos]
ENSAPLG00020008135	2.894	38.1553	3.72075	1.05627e-13	4.44503e-12	CCL15	XP_005030978.1 C-C motif chemokine 22 [Anas platyrhynchos]
ENSAPLG00020003810	2.61267	31.277	3.58151	1.07017e-13	4.49077e-12	FAM20C	XP_027324739.1 extracellular serine/threonine protein kinase FAM20C [Anas platyrhynchos]
ENSAPLG00020009625	43.044	131.612	1.61241	1.12707e-13	4.7162e-12	TDRD7	XP_027302140.2 tudor domain-containing protein 7 isoform X1 [Anas platyrhynchos]
ENSAPLG00020002481	14.5113	73.1543	2.33376	1.13422e-13	4.73271e-12	ENO2	PKK30609.1 enolase 2 (gamma, neuronal), partial [Columba livia]
ENSAPLG00020014317	71.7437	293.434	2.03211	1.22411e-13	5.09347e-12	ALDH1A3	XP_005011147.2 aldehyde dehydrogenase family 1 member A3 [Anas platyrhynchos]
ENSAPLG00020015884	9.79933	55.9573	2.51357	1.26241e-13	5.23814e-12	PI4K2B	EOB01586.1 Phosphatidylinositol 4-kinase type 2-beta, partial [Anas platyrhynchos]
ENSAPLG00020001710	28.83	129.985	2.1727	1.33396e-13	5.51954e-12	Mrpl30	XP_032063926.1 39S ribosomal protein L30, mitochondrial [Aythya fuligula]
ENSAPLG00020004416	75.2647	11.805	-2.67257	1.38809e-13	5.72751e-12	TLR2-1	XP_005021002.3 toll-like receptor 2 type-1 [Anas platyrhynchos]
ENSAPLG00020007137	16.2	53.4943	1.72339	1.40978e-13	5.80087e-12	LDLRAD4	XP_027307729.1 low-density lipoprotein receptor class A domain-containing protein 4 isoform X1 [Anas platyrhynchos]
ENSAPLG00020008616	0.001	8.567	13.0646	1.50702e-13	6.1838e-12	DRC7	XP_012955456.3 dynein regulatory complex subunit 7 isoform X1 [Anas platyrhynchos]
ENSAPLG00020008607	76.8177	213.818	1.47687	1.67003e-13	6.83374e-12	CMTR1	XP_038032627.1 cap-specific mRNA (nucleoside-2'-O-)-methyltransferase 1 [Anas platyrhynchos]
ENSAPLG00020001539	192.92	64.5923	-1.57857	1.79749e-13	7.33507e-12	PAQR8	XP_012949825.1 membrane progestin receptor beta isoform X1 [Anas platyrhynchos]
MSTRG.8117	0.589333	5.42033	3.20123	2.30666e-13	9.38697e-12	--	EOA96047.1 taxid=8839 hypothetical protein Anapl_03867 [Anas platyrhynchos]
ENSAPLG00020004580	59.5973	22.6013	-1.39884	2.36301e-13	9.58993e-12	IPO11	XP_027302045.2 importin-11 isoform X1 [Anas platyrhynchos]
ENSAPLG00020007475	0.001	6.301	12.6214	2.59646e-13	1.05086e-11	ZFR	XP_038025518.1 zinc finger RNA-binding protein-like isoform X2 [Anas platyrhynchos]
ENSAPLG00020006047	0.112667	10.116	6.48843	2.62346e-13	1.05889e-11	GEM	XP_005030168.1 GTP-binding protein GEM [Anas platyrhynchos]
MSTRG.2214	8.42533	1.746	-2.27068	2.92001e-13	1.17538e-11	NHS	XP_027303846.2 taxid=8839 Nance-Horan syndrome protein isoform X3 [Anas platyrhynchos]
ENSAPLG00020003332	1.54967	9.91667	2.6779	3.19855e-13	1.28401e-11	CGN	XP_032060231.1 cingulin [Aythya fuligula]
ENSAPLG00020014326	1.035	39.175	5.24223	3.32408e-13	1.3308e-11	Jchain	XP_005031370.1 immunoglobulin J chain [Anas platyrhynchos]
ENSAPLG00020017204	80.7623	27.4253	-1.55817	3.3955e-13	1.35573e-11	SPECC1	XP_032056846.1 cytospin-B isoform X1 [Aythya fuligula]
ENSAPLG00020005198	69.949	14.096	-2.31102	3.42111e-13	1.36228e-11	WASF3	XP_027325318.2 wiskott-Aldrich syndrome protein family member 3 isoform X2 [Anas platyrhynchos]
ENSAPLG00020006815	86.953	24.845	-1.80728	3.50111e-13	1.3904e-11	HS2ST1	XP_027318440.1 heparan sulfate 2-O-sulfotransferase 1 [Anas platyrhynchos]
MSTRG.21852	6.63567	0.812667	-3.02951	3.59367e-13	1.42334e-11	--	EOA93012.1 taxid=8839 hypothetical protein Anapl_16355 [Anas platyrhynchos]
ENSAPLG00020016164	58.9257	17.3507	-1.76391	3.72309e-13	1.47067e-11	Arrdc1	XP_027326572.1 LOW QUALITY PROTEIN: arrestin domain-containing protein 1 [Anas platyrhynchos]
ENSAPLG00020017660	145.202	573.965	1.98291	3.79381e-13	1.49462e-11	EGLN3	XP_013796419.1 PREDICTED: egl nine homolog 3 [Apteryx mantelli mantelli]
ENSAPLG00020010699	0.064	38.864	9.24615	3.84491e-13	1.51012e-11	BTF3	XP_038025334.1 transcription factor BTF3 isoform X1 [Anas platyrhynchos]
ENSAPLG00020010951	0.484	95.2553	7.62065	3.85354e-13	1.51012e-11	IL22	XP_038023466.1 interleukin-22 [Anas platyrhynchos]
ENSAPLG00020010883	0.001	5.23667	12.3544	4.16434e-13	1.62761e-11	Rasa1	XP_038025409.1 ras GTPase-activating protein 1 isoform X1 [Anas platyrhynchos]
ENSAPLG00020001177	45.249	150.571	1.73448	4.24129e-13	1.65291e-11	PHF11	XP_038034679.1 histone-lysine N-methyltransferase SETDB2 [Anas platyrhynchos]
ENSAPLG00020013021	66.0907	305.717	2.20968	4.2514e-13	1.65291e-11	TNFAIP3	EOB02639.1 Tumor necrosis factor, alpha-induced protein 3, partial [Anas platyrhynchos]
ENSAPLG00020018393	7.94833	0.0786667	-6.65876	4.26426e-13	1.65357e-11	FGD2	XP_038020986.1 FYVE, RhoGEF and PH domain-containing protein 2 isoform X7 [Anas platyrhynchos]
ENSAPLG00020010084	4.01733	18.825	2.22834	4.38368e-13	1.69544e-11	CDYL2	XP_027322659.1 chromodomain Y-like protein 2 [Anas platyrhynchos]
ENSAPLG00020008701	346.961	109.319	-1.66623	4.44826e-13	1.71594e-11	TMEM63A	XP_027309493.2 CSC1-like protein 1 [Anas platyrhynchos]
ENSAPLG00020005470	25.3657	70.6787	1.4784	4.64072e-13	1.78553e-11	FLRT3	PKU33384.1 leucine-rich repeat transmembrane protein flrt3 [Limosa lapponica baueri]
ENSAPLG00020005811	322.003	91.8367	-1.80993	4.7229e-13	1.81244e-11	PTPRA	EOB08200.1 Receptor-type tyrosine-protein phosphatase alpha, partial [Anas platyrhynchos]
ENSAPLG00020000845	25.4927	7.372	-1.78995	4.7432e-13	1.81553e-11	KIF13B	XP_027311214.1 kinesin-like protein KIF13B isoform X4 [Anas platyrhynchos]
ENSAPLG00020010171	495.92	135.385	-1.87304	6.01389e-13	2.29597e-11	Gpx1	XP_027323754.2 glutathione peroxidase 1 [Anas platyrhynchos]
ENSAPLG00020015100	213.052	79.0217	-1.43089	6.07031e-13	2.31155e-11	Mcoln1	XP_038025247.1 mucolipin-1-like isoform X1 [Anas platyrhynchos]
ENSAPLG00020004735	5.07633	49.8423	3.29551	6.34778e-13	2.41102e-11	IL1RN	XP_035170306.1 interleukin-36 receptor antagonist protein-like isoform X1 [Oxyura jamaicensis]
ENSAPLG00020008433	75.8397	291.854	1.94422	7.08052e-13	2.68245e-11	Samd9l	XP_027327433.2 sterile alpha motif domain-containing protein 9-like isoform X2 [Anas platyrhynchos]
ENSAPLG00020011484	182.512	65.0187	-1.48907	7.10162e-13	2.68358e-11	CR2	XP_038024478.1 complement receptor type 1 [Anas platyrhynchos]
ENSAPLG00020011523	0.840333	21.2707	4.66176	7.79806e-13	2.93926e-11	IGFBP2	XP_027316901.1 insulin-like growth factor-binding protein 2 isoform X1 [Anas platyrhynchos]
MSTRG.17879	6.768	26.7563	1.98308	8.22701e-13	3.09306e-11	--	-
ENSAPLG00020012898	5.36767	39.1143	2.86533	8.64137e-13	3.24062e-11	THBD	XP_038031863.1 LOW QUALITY PROTEIN: thrombomodulin [Anas platyrhynchos]
MSTRG.13063	21.0447	112.41	2.41725	9.58753e-13	3.58637e-11	--	NWZ30868.1 taxid=75869 SETBP protein [Asarcornis scutulata]
ENSAPLG00020007533	457.423	1194.69	1.38503	1.04898e-12	3.91399e-11	HLA-B	ADO19715.1 MHC class I antigen heavy chain, partial [Anas platyrhynchos]
ENSAPLG00020013155	56.3607	16.0167	-1.81511	1.13155e-12	4.21147e-11	--	XP_005010049.4 toll-like receptor 2 [Anas platyrhynchos]
ENSAPLG00020018352	81.5557	30.0243	-1.44165	1.19348e-12	4.43082e-11	DENND2A	XP_005021556.1 DENN domain-containing protein 2A [Anas platyrhynchos]
ENSAPLG00020010081	41.9967	117.742	1.48728	1.21003e-12	4.48105e-11	ERRFI1	XP_012959400.3 ERBB receptor feedback inhibitor 1 [Anas platyrhynchos]
ENSAPLG00020017322	37.2453	10.7853	-1.78799	1.21957e-12	4.5051e-11	Dusp11	XP_027315947.2 uncharacterized protein LOC101797887 isoform X1 [Anas platyrhynchos]
ENSAPLG00020013150	3.40233	19.682	2.53228	1.24439e-12	4.58537e-11	STING1	XP_027323921.2 stimulator of interferon genes protein isoform X1 [Anas platyrhynchos]
ENSAPLG00020016401	9.24933	43.833	2.2446	1.29023e-12	4.732e-11	TRIM58	XP_027301764.2 E3 ubiquitin-protein ligase TRIM39-like [Anas platyrhynchos]
ENSAPLG00020010761	0.001	4.511	12.1392	1.29058e-12	4.732e-11	Zswim6	XP_038025401.1 zinc finger SWIM domain-containing protein 6 isoform X1 [Anas platyrhynchos]
ENSAPLG00020009432	200.072	65.564	-1.60955	1.2975e-12	4.74563e-11	ABCD2	XP_027314719.2 ATP-binding cassette sub-family D member 2 [Anas platyrhynchos]
MSTRG.14460	0.247	4.37667	4.14725	1.42345e-12	5.19348e-11	--	EOB01807.1 taxid=8839 hypothetical protein Anapl_01565 [Anas platyrhynchos]
ENSAPLG00020006021	90.09	291.948	1.69627	1.42817e-12	5.19791e-11	ZC3HAV1	XP_027309840.2 zinc finger CCCH-type antiviral protein 1 isoform X1 [Anas platyrhynchos]
ENSAPLG00020007023	35.468	8.506	-2.05997	1.44894e-12	5.26057e-11	CLYBL	XP_038029370.1 citramalyl-CoA lyase, mitochondrial isoform X3 [Anas platyrhynchos]
ENSAPLG00020002267	0.719667	17.4013	4.59573	1.4958e-12	5.41742e-11	AQP1	XP_005012516.1 aquaporin-1 [Anas platyrhynchos]
ENSAPLG00020011102	312.938	100.313	-1.64137	1.53906e-12	5.56052e-11	SLC23A2	XP_032060108.1 solute carrier family 23 member 2 [Aythya fuligula]
ENSAPLG00020017948	129.966	336.853	1.37399	1.62076e-12	5.84145e-11	EHD3	XP_005022023.3 EH domain-containing protein 3 [Anas platyrhynchos]
MSTRG.583	19.6877	2.59767	-2.922	1.63095e-12	5.86389e-11	PPFIA2	XP_047934817.1 taxid=8845 liprin-alpha-2-like isoform X1 [Anser cygnoides]
ENSAPLG00020006716	19.8547	4.78633	-2.05249	1.65678e-12	5.94233e-11	CYP46A1	XP_027314408.1 cholesterol 24-hydroxylase [Anas platyrhynchos]
ENSAPLG00020000448	612.911	228.053	-1.42631	1.72328e-12	6.16593e-11	Taldo1	XP_027314415.1 transaldolase [Anas platyrhynchos]
ENSAPLG00020016461	27.8263	112.245	2.01212	1.73866e-12	6.20595e-11	RFFL	XP_005010702.3 E3 ubiquitin-protein ligase rififylin isoform X3 [Anas platyrhynchos]
ENSAPLG00020002517	46.4747	11.8173	-1.97554	1.79336e-12	6.38582e-11	TTYH2	XP_027327302.2 protein tweety homolog 2 [Anas platyrhynchos]
MSTRG.10413	0.643	9.426	3.87376	1.90774e-12	6.77683e-11	--	-
ENSAPLG00020011545	101.603	3.18933	-4.99354	2.01331e-12	7.13474e-11	F13a1	XP_005010762.1 coagulation factor XIII A chain [Anas platyrhynchos]
ENSAPLG00020014848	278.017	945.829	1.7664	2.0312e-12	7.18093e-11	STAT1	QCY58620.1 signal transducer and activator of transcription 1 [Anas platyrhynchos]
ENSAPLG00020010775	0.001	9.58167	13.2261	2.09436e-12	7.38662e-11	KCMF1	XP_032062809.1 E3 ubiquitin-protein ligase KCMF1-like isoform X1 [Aythya fuligula]
ENSAPLG00020011697	1.58	8.694	2.4601	2.16746e-12	7.62627e-11	GIMAP2	XP_038030387.1 GTPase IMAP family member 8-like isoform X3 [Anas platyrhynchos]
ENSAPLG00020008574	74.5553	20.9	-1.83481	2.20352e-12	7.73476e-11	Btn2a2	XP_038043764.1 butyrophilin subfamily 1 member A1-like isoform X2 [Anas platyrhynchos]
ENSAPLG00020007981	17.4167	84.9017	2.28532	2.3167e-12	8.11281e-11	CASP3	XP_005030551.1 caspase-3 [Anas platyrhynchos]
MSTRG.6297	0.826667	6.99433	3.08081	2.47313e-12	8.64021e-11	--	-
ENSAPLG00020002092	69.659	194.251	1.47954	2.60185e-12	9.04971e-11	ALAS1	XP_027323579.2 5-aminolevulinate synthase, nonspecific, mitochondrial [Anas platyrhynchos]
ENSAPLG00020011408	2.733	0.227	-3.58972	2.60256e-12	9.04971e-11	ACACB	XP_038043378.1 LOW QUALITY PROTEIN: acetyl-CoA carboxylase 2 [Anas platyrhynchos]
ENSAPLG00020018264	14.7703	45.9347	1.63688	2.63847e-12	9.1531e-11	Trim24	XP_038021920.1 transcription intermediary factor 1-alpha isoform X1 [Anas platyrhynchos]
ENSAPLG00020002557	0.001	3.91233	11.9338	2.65648e-12	9.19404e-11	CHD1	XP_038025314.1 chromodomain-helicase-DNA-binding protein 1 isoform X1 [Anas platyrhynchos]
MSTRG.12648	260.775	84.1173	-1.63233	2.68101e-12	9.25731e-11	MYO1F	XP_049664364.1 taxid=8957 unconventional myosin-If isoform X5 [Accipiter gentilis]
ENSAPLG00020009045	0.420333	9.621	4.51658	2.69875e-12	9.29689e-11	LIF	XP_038043492.1 leukemia inhibitory factor isoform X1 [Anas platyrhynchos]
ENSAPLG00020010612	1.377	11.4093	3.05061	3.0089e-12	1.03413e-10	TRIM27	XP_005018362.3 E3 ubiquitin-protein ligase TRIM39-like [Anas platyrhynchos]
ENSAPLG00020001421	1.49867	34.5767	4.52805	3.26407e-12	1.11923e-10	DUSP4	XP_027311681.2 LOW QUALITY PROTEIN: dual specificity protein phosphatase 4 [Anas platyrhynchos]
ENSAPLG00020018187	208.69	89.8693	-1.21546	3.28255e-12	1.12296e-10	ACLY	XP_027300986.1 ATP-citrate synthase isoform X1 [Anas platyrhynchos]
ENSAPLG00020013747	25.7443	8.197	-1.65109	3.34885e-12	1.14301e-10	SDK1	XP_038042781.1 protein sidekick-1 isoform X1 [Anas platyrhynchos]
ENSAPLG00020004704	15.2857	54.6907	1.83912	3.59952e-12	1.22574e-10	--	XP_027324936.2 uncharacterized protein LOC101800187 [Anas platyrhynchos]
ENSAPLG00020009313	74.0417	196.008	1.4045	3.68025e-12	1.25036e-10	KLF6	EOB07314.1 Krueppel-like factor 6, partial [Anas platyrhynchos]
ENSAPLG00020013610	30.1697	104.253	1.78891	3.76871e-12	1.27748e-10	NFKB2	XP_038037097.1 nuclear factor NF-kappa-B p100 subunit isoform X3 [Anas platyrhynchos]
ENSAPLG00020001883	240.381	596.43	1.31103	3.90146e-12	1.31946e-10	ZYX	XP_038036159.1 zyxin [Anas platyrhynchos]
ENSAPLG00020004067	15.2943	3.11767	-2.29446	4.11524e-12	1.38859e-10	GUCY1B1	XP_029872977.1 guanylate cyclase soluble subunit beta-1 isoform X1 [Aquila chrysaetos chrysaetos]
ENSAPLG00020003146	212.155	76.488	-1.47181	4.16781e-12	1.40313e-10	nsmce1	XP_005018660.1 non-structural maintenance of chromosomes element 1 homolog isoform X1 [Anas platyrhynchos]
ENSAPLG00020014452	25.3983	4.52133	-2.48991	4.27587e-12	1.43625e-10	TRAV1-2	XP_038028231.1 uncharacterized protein LOC113841485 [Anas platyrhynchos]
ENSAPLG00020010406	37.859	109.866	1.53703	4.29054e-12	1.43791e-10	S100A11	XP_032060374.1 protein S100-A11 [Aythya fuligula]
ENSAPLG00020010596	161.528	430.397	1.41388	4.59518e-12	1.53653e-10	CD47	XP_027305272.2 leukocyte surface antigen CD47 isoform X2 [Anas platyrhynchos]
ENSAPLG00020005793	57.1913	15.7777	-1.85791	4.63717e-12	1.54708e-10	PARD3B	XP_027316949.1 partitioning defective 3 homolog B [Anas platyrhynchos]
ENSAPLG00020006927	370.316	152.802	-1.27709	4.66597e-12	1.55319e-10	HSD17B12	O57314.1 RecName: Full=Very-long-chain 3-oxoacyl-CoA reductase; AltName: Full=17-beta-hydroxysteroid dehydrogenase 12; Short=17-beta-HSD 12; AltName: Full=3-ketoacyl-CoA reductase; Short=KAR; AltName: Full=Estradiol 17-beta-dehydrogenase 12 [Anas platyrhynchos]
ENSAPLG00020008456	14.355	47.1097	1.71447	4.69734e-12	1.56013e-10	TJP2	XP_040398229.1 tight junction protein ZO-2 isoform X1 [Cygnus olor]
ENSAPLG00020011470	591.515	189.681	-1.64084	5.31866e-12	1.76253e-10	AP3M2	XP_027299381.1 AP-3 complex subunit mu-2 [Anas platyrhynchos]
ENSAPLG00020010061	131.987	32.952	-2.00196	5.44105e-12	1.79907e-10	GPATCH11	XP_005022277.1 G patch domain-containing protein 11 isoform X1 [Anas platyrhynchos]
ENSAPLG00020010212	41.6057	107.612	1.37099	5.62486e-12	1.8557e-10	TRAF2	XP_027326847.1 TNF receptor-associated factor 2 isoform X1 [Anas platyrhynchos]
ENSAPLG00020012475	108.303	255.132	1.23617	6.01205e-12	1.97644e-10	PNRC1	XP_032041008.1 proline-rich nuclear receptor coactivator 1 [Aythya fuligula]
ENSAPLG00020002632	71.523	26.3363	-1.44135	6.01751e-12	1.97644e-10	Pus1	XP_027326000.1 tRNA pseudouridine synthase A [Anas platyrhynchos]
ENSAPLG00020015830	53.6817	12.3707	-2.11751	6.27475e-12	2.05637e-10	C9orf72	XP_027302204.2 guanine nucleotide exchange C9orf72 homolog isoform X1 [Anas platyrhynchos]
ENSAPLG00020003513	61.845	232.614	1.91121	6.36403e-12	2.07937e-10	TUBA1C	XP_032060813.1 tubulin alpha-1C chain-like isoform X1 [Aythya fuligula]
ENSAPLG00020002025	122.32	38.245	-1.67731	6.373e-12	2.07937e-10	ABCB10	EOB00838.1 ATP-binding cassette sub-family B member 10, mitochondrial, partial [Anas platyrhynchos]
ENSAPLG00020001346	34.6453	96.5127	1.47806	6.76525e-12	2.2025e-10	WDFY2	XP_032062490.1 WD repeat and FYVE domain-containing protein 2 [Aythya fuligula]
ENSAPLG00020004667	34.7863	138.008	1.98816	7.04369e-12	2.28812e-10	SLC43A2	XP_005025070.3 large neutral amino acids transporter small subunit 4 [Anas platyrhynchos]
ENSAPLG00020000403	13.5127	49.6003	1.87604	7.09481e-12	2.29968e-10	PRKAG2	XP_032036845.1 5'-AMP-activated protein kinase subunit gamma-2 isoform X1 [Aythya fuligula]
ENSAPLG00020007729	45.0677	15.0903	-1.57847	7.90174e-12	2.55564e-10	POLR1B	XP_038032334.1 DNA-directed RNA polymerase I subunit RPA2-like [Anas platyrhynchos]
ENSAPLG00020001838	55.144	132.184	1.26128	8.04364e-12	2.59587e-10	Ptpn12	XP_027315435.2 LOW QUALITY PROTEIN: tyrosine-protein phosphatase non-receptor type 12 [Anas platyrhynchos]
ENSAPLG00020005982	5.18233	39.5583	2.93231	8.35301e-12	2.68985e-10	--	XP_005016889.1 inducible T-cell costimulator [Anas platyrhynchos]
ENSAPLG00020011670	496.348	170.913	-1.53809	8.41964e-12	2.70543e-10	VASH1	XP_027314241.1 tubulinyl-Tyr carboxypeptidase 1 [Anas platyrhynchos]
ENSAPLG00020009833	0.524	11.3023	4.43091	8.81364e-12	2.8259e-10	Ccr4	XP_021124531.1 C-C chemokine receptor type 4 isoform X1 [Anas platyrhynchos]
ENSAPLG00020012412	0.806	7.63867	3.24447	9.40327e-12	3.00844e-10	IL12RB1	XP_035203908.1 interleukin-12 receptor subunit beta-1 isoform X1 [Oxyura jamaicensis]
ENSAPLG00020014632	1.292	11.4477	3.14738	9.73839e-12	3.10894e-10	SERPING1	XP_038036331.1 LOW QUALITY PROTEIN: plasma protease C1 inhibitor [Anas platyrhynchos]
MSTRG.5336	1.41133	13.5637	3.26462	9.94374e-12	3.16767e-10	--	-
ENSAPLG00020009631	0.476	5.85633	3.62096	1.06971e-11	3.40036e-10	ETV4	XP_032058660.1 ETS translocation variant 4 isoform X1 [Aythya fuligula]
ENSAPLG00020016031	52.1517	20.1887	-1.36917	1.07392e-11	3.40642e-10	ACAC	XP_038021815.1 acetyl-CoA carboxylase 1 isoform X1 [Anas platyrhynchos]
MSTRG.11456	17.8273	56.291	1.65881	1.11527e-11	3.53002e-10	--	XP_027301318.2 taxid=8839 uncharacterized protein LOC101790937 [Anas platyrhynchos]
ENSAPLG00020000218	0.946	6.56233	2.7943	1.11869e-11	3.53331e-10	RUNX2	XP_038032147.1 runt-related transcription factor 2 isoform X1 [Anas platyrhynchos]
ENSAPLG00020000355	46.7477	15.0547	-1.63468	1.26433e-11	3.98478e-10	liph-a	XP_005026096.3 lipase member I [Anas platyrhynchos]
ENSAPLG00020002434	0.001	10.18	13.3134	1.30466e-11	4.10316e-10	Krt75	XP_040395683.1 keratin, type II cytoskeletal 5-like [Cygnus olor]
ENSAPLG00020014565	2.04967	12.317	2.58719	1.36158e-11	4.27311e-10	Ubap1	XP_038025607.1 ubiquitin-associated protein 1-like isoform X2 [Anas platyrhynchos]
ENSAPLG00020010511	5.45433	33.1977	2.60561	1.36489e-11	4.27445e-10	COQ8A	XP_038032045.1 atypical kinase COQ8A, mitochondrial [Anas platyrhynchos]
MSTRG.15346	0.81	12.7293	3.97409	1.37509e-11	4.29731e-10	--	XP_040398540.1 taxid=8869 uncharacterized protein LOC121062564 [Cygnus olor]
ENSAPLG00020015123	0.001	5.381	12.3937	1.48576e-11	4.63339e-10	UBQLN1	XP_027304074.1 ubiquilin-1-like isoform X1 [Anas platyrhynchos]
ENSAPLG00020006115	18.6637	68.9543	1.88541	1.64846e-11	5.12997e-10	RAPH1	XP_032045521.1 ras-associated and pleckstrin homology domains-containing protein 1 isoform X3 [Aythya fuligula]
ENSAPLG00020003333	1.4	9.2	2.71621	1.6544e-11	5.13766e-10	LOXL2	XP_038022754.1 lysyl oxidase homolog 2 [Anas platyrhynchos]
ENSAPLG00020008346	33.1437	120.642	1.86392	1.80708e-11	5.60006e-10	SLC46A2	XP_038026067.1 thymic stromal cotransporter homolog [Anas platyrhynchos]
ENSAPLG00020015887	61.3607	13.6843	-2.16479	1.89606e-11	5.86354e-10	Mapk11	PKU48192.1 mitogen-activated protein kinase 11 [Limosa lapponica baueri]
ENSAPLG00020007067	307.451	107.825	-1.51166	1.93375e-11	5.96764e-10	ABCC5	XP_032049100.1 multidrug resistance-associated protein 5 isoform X1 [Aythya fuligula]
ENSAPLG00020010931	46.8217	153.501	1.713	2.16924e-11	6.68043e-10	--	XP_027304463.1 uncharacterized protein LOC113841983 [Anas platyrhynchos]
ENSAPLG00020016216	23.2593	66.6537	1.51887	2.21129e-11	6.79581e-10	Clk3	XP_038041049.1 dual specificity protein kinase CLK3 isoform X2 [Anas platyrhynchos]
ENSAPLG00020010217	50.3833	14.015	-1.84597	2.23284e-11	6.84785e-10	OTULINL	XP_012958268.2 inactive ubiquitin thioesterase OTULINL isoform X4 [Anas platyrhynchos]
ENSAPLG00020013467	118.109	44.7387	-1.40052	2.27447e-11	6.96111e-10	WDFY4	XP_021129955.1 WD repeat- and FYVE domain-containing protein 4 isoform X1 [Anas platyrhynchos]
ENSAPLG00020010452	0.230333	4.726	4.35882	2.32222e-11	7.0926e-10	SLC13A3	XP_027328988.1 solute carrier family 13 member 3 [Anas platyrhynchos]
ENSAPLG00020003522	79.7953	25.8103	-1.62836	2.34583e-11	7.14994e-10	OSBPL5	XP_035395973.1 oxysterol-binding protein-related protein 5 isoform X1 [Cygnus atratus]
ENSAPLG00020011040	6.625	22.8327	1.78511	2.43795e-11	7.41546e-10	RUBCN	XP_032049658.1 run domain Beclin-1-interacting and cysteine-rich domain-containing protein isoform X3 [Aythya fuligula]
ENSAPLG00020009893	0.0946667	2.348	4.63243	2.44584e-11	7.42421e-10	CACNA1E	XP_040422308.1 voltage-dependent R-type calcium channel subunit alpha-1E isoform X7 [Cygnus olor]
ENSAPLG00020009387	2.208	21.5777	3.28873	2.4774e-11	7.50465e-10	CYGB	KQK80235.1 cytoglobin [Amazona aestiva]
ENSAPLG00020011989	0.260667	3.79867	3.86522	2.48979e-11	7.52678e-10	TP63	XP_013050457.1 PREDICTED: tumor protein 63 isoform X3 [Anser cygnoides domesticus]
ENSAPLG00020012805	40.04	207.393	2.37286	2.59832e-11	7.83889e-10	A2M	XP_005030047.1 ovostatin [Anas platyrhynchos]
ENSAPLG00020004098	53.1797	10.4003	-2.35424	2.66259e-11	8.01645e-10	HLA-DRB1	XP_038043922.1 class II histocompatibility antigen, B-L beta chain-like isoform X2 [Anas platyrhynchos]
ENSAPLG00020012421	41.2007	107.194	1.37948	2.70479e-11	8.12698e-10	KLF15	XP_012960132.1 Krueppel-like factor 15 isoform X2 [Anas platyrhynchos]
ENSAPLG00020012126	5.20467	24.9393	2.26055	2.80539e-11	8.41219e-10	Plek	XP_005025221.1 pleckstrin [Anas platyrhynchos]
ENSAPLG00020008337	34.552	14.4577	-1.25693	2.82956e-11	8.46752e-10	FOCAD	XP_038026105.1 focadhesin isoform X1 [Anas platyrhynchos]
ENSAPLG00020002995	1.78367	21.1373	3.56688	2.86569e-11	8.55835e-10	--	XP_038028608.1 guanylate-binding protein 2-like [Anas platyrhynchos]
ENSAPLG00020010325	15.285	57.3467	1.90759	2.97628e-11	8.87077e-10	CFLAR	XP_012950195.1 CASP8 and FADD-like apoptosis regulator isoform X1 [Anas platyrhynchos]
ENSAPLG00020012790	0.760333	10.4527	3.7811	3.14012e-11	9.34029e-10	ZC3H12D	XP_005008947.5 probable ribonuclease ZC3H12D [Anas platyrhynchos]
MSTRG.12588	1.54433	9.859	2.67446	3.27737e-11	9.729e-10	--	-
ENSAPLG00020000837	24.8367	94.5387	1.92843	3.35264e-11	9.93254e-10	Drd4	XP_027313903.1 D(4) dopamine receptor [Anas platyrhynchos]
MSTRG.7468	31	14.9773	-1.04949	3.51648e-11	1.03971e-09	Mtch1	XP_038020838.1 taxid=8839 mitochondrial carrier homolog 1-like isoform X1 [Anas platyrhynchos]
ENSAPLG00020014550	0.001	8.27367	13.0143	3.528e-11	1.04104e-09	UBE2R2	XP_038025574.1 ubiquitin-conjugating enzyme E2 R2-like isoform X1 [Anas platyrhynchos]
ENSAPLG00020003633	81.27	444.671	2.45194	3.6243e-11	1.06733e-09	ZFAND2B	XP_032053509.1 AN1-type zinc finger protein 2A isoform X2 [Aythya fuligula]
ENSAPLG00020001495	5.76033	20.913	1.86018	3.66024e-11	1.07578e-09	PATL1	XP_027314266.2 LOW QUALITY PROTEIN: protein PAT1 homolog 1 [Anas platyrhynchos]
ENSAPLG00020018421	58.1603	212.616	1.87014	3.79212e-11	1.11233e-09	Shisa5	XP_038041739.1 protein shisa-5 isoform X3 [Anas platyrhynchos]
ENSAPLG00020006494	303.915	686.715	1.17604	3.8908e-11	1.13902e-09	CD44	XP_038035720.1 CD44 antigen isoform X3 [Anas platyrhynchos]
ENSAPLG00020000059	0.51	4.95	3.27886	4.1563e-11	1.21434e-09	Gvin1	XP_032039457.1 interferon-induced very large GTPase 1-like [Aythya fuligula]
ENSAPLG00020015012	0.919	5.26733	2.51894	4.178e-11	1.21828e-09	DAB2IP	XP_027326576.1 disabled homolog 2-interacting protein isoform X3 [Anas platyrhynchos]
ENSAPLG00020013943	231.561	105.343	-1.13629	4.20827e-11	1.2247e-09	Ralbp1	XP_027307855.1 LOW QUALITY PROTEIN: ralA-binding protein 1 [Anas platyrhynchos]
ENSAPLG00020013911	36.1357	131.064	1.85878	4.36716e-11	1.26845e-09	CIDEA	XP_005013154.1 cell death activator CIDE-A isoform X1 [Anas platyrhynchos]
MSTRG.8921	75.6117	20.4777	-1.88456	4.41412e-11	1.27958e-09	--	-
ENSAPLG00020015876	7.097	36.6603	2.36894	4.5725e-11	1.3229e-09	Panx2	XP_027314162.1 pannexin-2 isoform X1 [Anas platyrhynchos]
ENSAPLG00020007468	5.32667	27.579	2.37227	4.58868e-11	1.32499e-09	CASP7	XP_005014501.2 caspase-7 isoform X1 [Anas platyrhynchos]
ENSAPLG00020004374	277.794	885.079	1.67179	4.71502e-11	1.35883e-09	CNOT9	CAG31883.1 hypothetical protein RCJMB04_13a11 [Gallus gallus]
ENSAPLG00020012106	2456.4	775.709	-1.66296	4.91606e-11	1.41401e-09	CTSH	XP_027321911.1 pro-cathepsin H [Anas platyrhynchos]
ENSAPLG00020017339	0.417667	5.99733	3.8439	5.05889e-11	1.45227e-09	FRMD6	XP_040415110.1 FERM domain-containing protein 6-like isoform X2 [Cygnus olor]
ENSAPLG00020008837	30.1333	9.02767	-1.73894	5.08482e-11	1.45689e-09	SLC8A1	XP_013051624.1 PREDICTED: sodium/calcium exchanger 1 isoform X1 [Anser cygnoides domesticus]
ENSAPLG00020007967	0.567667	7.934	3.80493	5.17131e-11	1.47882e-09	Gzmg	XP_005019579.2 granzyme G [Anas platyrhynchos]
ENSAPLG00020004642	0.097	2.30733	4.5721	5.21179e-11	1.48752e-09	PTPN13	XP_038034099.1 tyrosine-protein phosphatase non-receptor type 13 isoform X2 [Anas platyrhynchos]
ENSAPLG00020008974	0.001	9.07767	13.1481	5.31771e-11	1.51483e-09	Ca9	XP_035165174.1 carbonic anhydrase 9 isoform X1 [Oxyura jamaicensis]
ENSAPLG00020006300	0.640333	7.71367	3.59052	5.37815e-11	1.52911e-09	ARHGAP8	XP_038029304.1 rho GTPase-activating protein 8 isoform X2 [Anas platyrhynchos]
ENSAPLG00020005015	5.08	44.0413	3.11596	5.62156e-11	1.59443e-09	gjc1	XP_032046235.1 gap junction gamma-1 protein-like [Aythya fuligula]
ENSAPLG00020017761	241.712	672.954	1.47722	5.62942e-11	1.59443e-09	Gpr137b	XP_005023904.1 integral membrane protein GPR137B [Anas platyrhynchos]
ENSAPLG00020017320	19.5187	5.75233	-1.76264	5.73395e-11	1.6191e-09	Ccnj	XP_032047557.1 cyclin-J [Aythya fuligula]
ENSAPLG00020008438	8.737	0.001	-13.0929	5.73837e-11	1.6191e-09	FXN	XP_013798061.1 PREDICTED: frataxin, mitochondrial [Apteryx mantelli mantelli]
ENSAPLG00020000418	6.6	24.673	1.9024	5.86361e-11	1.65128e-09	EFR3B	XP_027311259.1 protein EFR3 homolog B isoform X4 [Anas platyrhynchos]
ENSAPLG00020000687	47.1027	16.8173	-1.48586	5.89681e-11	1.65748e-09	GNPAT	XP_027309996.2 dihydroxyacetone phosphate acyltransferase isoform X1 [Anas platyrhynchos]
ENSAPLG00020004619	68.2527	17.3267	-1.97789	5.93808e-11	1.66592e-09	FZD4	XP_005027824.5 frizzled-4 [Anas platyrhynchos]
ENSAPLG00020007871	1.53333	11.0707	2.852	5.94952e-11	1.66598e-09	Gpr161	XP_038038312.1 G-protein coupled receptor 161 isoform X1 [Anas platyrhynchos]
ENSAPLG00020007300	406.519	170.106	-1.25689	6.09539e-11	1.7036e-09	Bhlhe41	XP_027305817.1 class E basic helix-loop-helix protein 41 [Anas platyrhynchos]
ENSAPLG00020004636	0.603667	7.54367	3.64344	6.49034e-11	1.81057e-09	Tmprss2	XP_021132301.3 transmembrane protease serine 2 [Anas platyrhynchos]
ENSAPLG00020001147	5.97833	36.573	2.61296	6.66947e-11	1.85705e-09	DUSP8	XP_038035840.1 dual specificity protein phosphatase 8 isoform X2 [Anas platyrhynchos]
MSTRG.4464	0.220667	3.345	3.92207	7.19405e-11	1.99935e-09	CSPG4	XP_038041010.1 taxid=8839 chondroitin sulfate proteoglycan 4 isoform X1 [Anas platyrhynchos]
ENSAPLG00020015424	85.4417	28.4603	-1.58599	7.25251e-11	2.00977e-09	Eif4e3	XP_027323441.2 eukaryotic translation initiation factor 4E type 3 isoform X1 [Anas platyrhynchos]
ENSAPLG00020014890	81.9873	28.5167	-1.5236	7.25866e-11	2.00977e-09	Pttg1ip	XP_027319894.2 pituitary tumor-transforming gene 1 protein-interacting protein [Anas platyrhynchos]
ENSAPLG00020012003	385.175	145.948	-1.40006	7.38381e-11	2.03943e-09	FOS	XP_032044440.1 proto-oncogene c-Fos [Aythya fuligula]
ENSAPLG00020010272	15.8647	4.17033	-1.92758	7.39333e-11	2.03943e-09	NCF2	XP_027326791.2 NADPH oxidase activator 1 [Anas platyrhynchos]
ENSAPLG00020004173	17.9113	71.8353	2.00382	7.94432e-11	2.18362e-09	SETX	XP_038020995.1 probable helicase senataxin isoform X1 [Anas platyrhynchos]
ENSAPLG00020000014	5.61433	36.543	2.70241	7.95356e-11	2.18362e-09	Pfkfb3	XP_035189951.1 6-phosphofructo-2-kinase/fructose-2,6-bisphosphatase 3 isoform X3 [Oxyura jamaicensis]
ENSAPLG00020008291	126.682	51.6023	-1.2957	7.96027e-11	2.18362e-09	PLTP	XP_027298699.2 phospholipid transfer protein [Anas platyrhynchos]
ENSAPLG00020005143	1114.63	2927.03	1.39288	8.00227e-11	2.19108e-09	CKB	XP_027313694.1 creatine kinase B-type isoform X1 [Anas platyrhynchos]
ENSAPLG00020009265	217.948	84.2263	-1.37164	8.06123e-11	2.20315e-09	Sec14l1	XP_038021209.1 SEC14-like protein 1 [Anas platyrhynchos]
ENSAPLG00020006051	20.0577	3.80867	-2.3968	8.30422e-11	2.26538e-09	TTC38	XP_035406959.1 tetratricopeptide repeat protein 38 [Cygnus atratus]
ENSAPLG00020008608	5.11467	24.017	2.23134	8.39118e-11	2.2849e-09	TRAF3IP2	XP_027548769.1 adapter protein CIKS isoform X1 [Neopelma chrysocephalum]
ENSAPLG00020016968	113.034	23.4173	-2.27111	8.64003e-11	2.34834e-09	COLEC12	XP_027307779.2 collectin-12 isoform X2 [Anas platyrhynchos]
ENSAPLG00020007042	5.40467	46.4857	3.10451	8.79834e-11	2.38699e-09	OLFML3	XP_027300934.1 olfactomedin-like protein 3 [Anas platyrhynchos]
ENSAPLG00020005848	13.264	54.7147	2.04441	9.00113e-11	2.43754e-09	ABTB2	XP_005022857.1 ankyrin repeat and BTB/POZ domain-containing protein 2 isoform X1 [Anas platyrhynchos]
ENSAPLG00020010434	195.298	467.708	1.25993	9.07328e-11	2.4526e-09	Tagln2	XP_038023854.1 LOW QUALITY PROTEIN: protein turtle homolog A [Anas platyrhynchos]
ENSAPLG00020015436	39.0997	10.0157	-1.9649	9.10221e-11	2.45594e-09	GXYLT2	EOA96937.1 Glycosyltransferase 8 domain-containing protein 4, partial [Anas platyrhynchos]
MSTRG.12867	0.359	4.94767	3.78469	9.2247e-11	2.48446e-09	--	-
ENSAPLG00020006166	10.021	35.202	1.81263	9.38218e-11	2.52229e-09	Art5	XP_027321243.2 LOW QUALITY PROTEIN: ecto-ADP-ribosyltransferase 5 [Anas platyrhynchos]
MSTRG.1975	105.281	32.5377	-1.69407	9.83797e-11	2.64003e-09	DOP1B	XP_027304932.2 taxid=8839 protein dopey-2 isoform X2 [Anas platyrhynchos]
ENSAPLG00020010988	4.296	0.496667	-3.11264	1.0548e-10	2.82546e-09	XDH	XP_032040149.1 xanthine dehydrogenase/oxidase isoform X2 [Aythya fuligula]
ENSAPLG00020013534	119.923	21.993	-2.447	1.12187e-10	2.99967e-09	ALOX5	XP_005025284.2 polyunsaturated fatty acid 5-lipoxygenase [Anas platyrhynchos]
ENSAPLG00020008175	0.001	14.9557	13.8684	1.20247e-10	3.2094e-09	LYVE1	XP_038036070.1 lymphatic vessel endothelial hyaluronic acid receptor 1 [Anas platyrhynchos]
ENSAPLG00020010732	0.0423333	5.78167	7.09355	1.26183e-10	3.36179e-09	ERVK-25	XP_038025581.1 uncharacterized protein LOC113840873 isoform X2 [Anas platyrhynchos]
ENSAPLG00020008198	36.8247	14.3773	-1.35688	1.26904e-10	3.37493e-09	SUSD1	XP_038026792.1 sushi domain-containing protein 1 isoform X2 [Anas platyrhynchos]
ENSAPLG00020008559	54.2013	7.884	-2.78133	1.2923e-10	3.43061e-09	SLC16A10	XP_032040786.1 monocarboxylate transporter 10 [Aythya fuligula]
ENSAPLG00020006211	331.314	116.163	-1.51205	1.32085e-10	3.50014e-09	SNX4	XP_027318139.1 LOW QUALITY PROTEIN: sorting nexin-4 [Anas platyrhynchos]
MSTRG.11865	9.84567	2.30033	-2.09765	1.39269e-10	3.68392e-09	Igfn1	XP_038024228.1 taxid=8839 immunoglobulin-like and fibronectin type III domain-containing protein 1 isoform X2 [Anas platyrhynchos]
ENSAPLG00020017811	6.117	25.8957	2.08181	1.39734e-10	3.68963e-09	Traf5	XP_038032447.1 TNF receptor-associated factor 5 isoform X1 [Anas platyrhynchos]
ENSAPLG00020011541	0.954667	8.468	3.14895	1.43371e-10	3.77893e-09	KIT	XP_038034614.1 mast/stem cell growth factor receptor Kit isoform X1 [Anas platyrhynchos]
ENSAPLG00020016676	7.70533	39.1817	2.34625	1.45659e-10	3.8324e-09	Bcar1	KGL73163.1 Breast cancer anti-estrogen resistance protein 1, partial [Tinamus guttatus]
ENSAPLG00020010446	0.700667	10.1377	3.85485	1.5463e-10	4.06124e-09	GATA2	NP_001003797.1 GATA-binding factor 2 isoform 2 [Gallus gallus]
ENSAPLG00020001808	13.9433	41.9323	1.58849	1.60672e-10	4.21245e-09	Ranbp2	XP_032044246.1 ranBP2-like and GRIP domain-containing protein 3 [Aythya fuligula]
ENSAPLG00020010817	7.95067	0.655667	-3.60004	1.64727e-10	4.31112e-09	wif1	XP_032055215.1 wnt inhibitory factor 1 [Aythya fuligula]
ENSAPLG00020011868	7707.34	2205.59	-1.80507	1.68519e-10	4.40258e-09	TFRC	EOA96246.1 Transferrin receptor protein 1, partial [Anas platyrhynchos]
ENSAPLG00020001616	0.001	32.6303	14.9939	1.70083e-10	4.43563e-09	Il17f	NP_001297279.1 interleukin-17A precursor [Anas platyrhynchos]
ENSAPLG00020006956	36.9523	13.217	-1.48327	1.71278e-10	4.45896e-09	FAAH	XP_027305427.2 LOW QUALITY PROTEIN: fatty acid amide hydrolase, partial [Anas platyrhynchos]
ENSAPLG00020005113	9.898	44.6757	2.17428	1.73113e-10	4.4977e-09	Fadd	XP_005022835.1 FAS-associated death domain protein [Anas platyrhynchos]
ENSAPLG00020002690	12.7473	4.024	-1.66349	1.73374e-10	4.4977e-09	MAML3	XP_027312532.1 mastermind-like protein 3 isoform X1 [Anas platyrhynchos]
ENSAPLG00020006333	15.1227	50.3043	1.73397	1.79096e-10	4.63803e-09	APRT	XP_027321528.2 adenine phosphoribosyltransferase [Anas platyrhynchos]
ENSAPLG00020013699	66.0723	146.451	1.1483	1.83378e-10	4.74063e-09	MYO1E	XP_013032834.1 PREDICTED: unconventional myosin-Ie isoform X2 [Anser cygnoides domesticus]
ENSAPLG00020003935	75.9673	23.4187	-1.69772	1.89079e-10	4.8795e-09	RGS9	XP_027327219.2 regulator of G-protein signaling 9 isoform X1 [Anas platyrhynchos]
ENSAPLG00020004436	9.31033	29.6133	1.66934	1.93187e-10	4.97682e-09	GNE	XP_027302127.1 bifunctional UDP-N-acetylglucosamine 2-epimerase/N-acetylmannosamine kinase isoform X1 [Anas platyrhynchos]
ENSAPLG00020002583	14.7947	70.4837	2.25221	2.13705e-10	5.49585e-09	SINHCAF	XP_013028492.1 PREDICTED: protein FAM60A [Anser cygnoides domesticus]
ENSAPLG00020003797	12.812	37.8017	1.56095	2.17724e-10	5.58951e-09	PDE4D	XP_032061277.1 cAMP-specific 3',5'-cyclic phosphodiesterase 4D isoform X2 [Aythya fuligula]
ENSAPLG00020017223	113.689	34.0373	-1.7399	2.1967e-10	5.6297e-09	TESK2	XP_032047893.1 dual specificity testis-specific protein kinase 2 [Aythya fuligula]
ENSAPLG00020003827	19.5263	99.481	2.349	2.24059e-10	5.73228e-09	F11R	XP_035426635.1 junctional adhesion molecule A [Cygnus atratus]
ENSAPLG00020001319	65.3567	205.621	1.65358	2.2647e-10	5.78397e-09	EXT1	XP_032037612.1 exostosin-1 [Aythya fuligula]
MSTRG.18292	0.482333	10.214	4.40437	2.36163e-10	6.02114e-09	KALRN	XP_035392640.1 taxid=8868 kalirin isoform X2 [Cygnus atratus]
ENSAPLG00020007031	6.787	28.8643	2.08844	2.37813e-10	6.05187e-09	IRF4	XP_032054459.1 interferon regulatory factor 4-like [Aythya fuligula]
MSTRG.2857	0.828	7.69567	3.21634	2.38186e-10	6.05187e-09	--	-
ENSAPLG00020012304	21.386	102.162	2.25612	2.39565e-10	6.0765e-09	GBP1	XP_038041838.1 guanylate-binding protein 1-like [Anas platyrhynchos]
ENSAPLG00020002241	1.24433	16.0507	3.68919	2.45497e-10	6.21632e-09	CD1D	XP_038022336.1 antigen-presenting glycoprotein CD1d-like [Anas platyrhynchos]
ENSAPLG00020016263	5.722	1.003	-2.5122	2.50348e-10	6.31756e-09	AASS	XP_027313802.2 alpha-aminoadipic semialdehyde synthase, mitochondrial isoform X1 [Anas platyrhynchos]
ENSAPLG00020012574	3.71467	15.3377	2.04577	2.79717e-10	7.04669e-09	ASAP3	XP_038023275.1 LOW QUALITY PROTEIN: arf-GAP with SH3 domain, ANK repeat and PH domain-containing protein 3 [Anas platyrhynchos]
ENSAPLG00020015186	21.3027	6.45433	-1.72269	2.92211e-10	7.34892e-09	SLC35B4	XP_027317156.1 UDP-xylose and UDP-N-acetylglucosamine transporter isoform X1 [Anas platyrhynchos]
ENSAPLG00020017686	49.8507	15.4417	-1.69078	2.97189e-10	7.46147e-09	TSPAN4	XP_027315500.1 tetraspanin-4 isoform X2 [Anas platyrhynchos]
ENSAPLG00020010068	2201.02	4915.4	1.15914	3.02933e-10	7.59281e-09	ENO1	XP_027298788.1 alpha-enolase isoform X2 [Anas platyrhynchos]
ENSAPLG00020006302	2.344	148.247	5.98289	3.05164e-10	7.63581e-09	IQCJ-SCHIP1	XP_005027639.2 schwannomin-interacting protein 1 isoform X8 [Anas platyrhynchos]
ENSAPLG00020001579	237.635	1202.9	2.3397	3.26356e-10	8.1523e-09	LY6E	XP_005016120.1 lymphocyte antigen 6E isoform X1 [Anas platyrhynchos]
ENSAPLG00020005326	17.3647	2.27333	-2.93327	3.29987e-10	8.22912e-09	KCNK13	XP_035184492.1 potassium channel subfamily K member 13 [Oxyura jamaicensis]
ENSAPLG00020012513	6.607	2.00667	-1.71919	3.31744e-10	8.25903e-09	PLXNB1	XP_027323144.2 plexin-B1 isoform X2 [Anas platyrhynchos]
MSTRG.619	0.001	6.84	12.7398	3.32416e-10	8.26188e-09	--	XP_032057653.1 taxid=219594 uncharacterized protein LOC116497819 [Aythya fuligula]
MSTRG.18827	0.396333	8.358	4.39837	3.35506e-10	8.3247e-09	--	-
ENSAPLG00020005411	131.143	40.768	-1.68563	3.37442e-10	8.35873e-09	NXPE3	EOB08541.1 Protein FAM55C, partial [Anas platyrhynchos]
MSTRG.15161	13.549	37.298	1.46091	3.59818e-10	8.89813e-09	CCDC138	XP_038027702.1 taxid=8839 coiled-coil domain-containing protein 138-like [Anas platyrhynchos]
ENSAPLG00020001221	26.6833	5.883	-2.18131	3.641e-10	8.97899e-09	TNNI2	XP_009570144.1 PREDICTED: troponin I, fast skeletal muscle isoform X1 [Cuculus canorus]
ENSAPLG00020005042	142.313	47.7403	-1.57579	3.643e-10	8.97899e-09	DOP1B	XP_027304929.2 protein dopey-2 isoform X1 [Anas platyrhynchos]
ENSAPLG00020013960	30.712	4.84533	-2.66413	3.65202e-10	8.98627e-09	ACVRL1	XP_035426252.1 serine/threonine-protein kinase receptor R3 [Cygnus atratus]
ENSAPLG00020001631	0.118333	4.07067	5.10434	3.73494e-10	9.17507e-09	SYBU	XP_027308418.2 syntabulin isoform X1 [Anas platyrhynchos]
ENSAPLG00020007346	126.258	57.7813	-1.1277	3.74597e-10	9.18692e-09	IARS2	XP_027308926.2 isoleucine--tRNA ligase, mitochondrial [Anas platyrhynchos]
MSTRG.7230	8.366	35.328	2.0782	3.87036e-10	9.4763e-09	--	KAI6075684.1 taxid=8832 hypothetical protein LUU34_00273700 [Aix galericulata]
ENSAPLG00020008944	236.374	86.4597	-1.45097	4.34842e-10	1.06292e-08	HVCN1	XP_038043215.1 voltage-gated hydrogen channel 1 [Anas platyrhynchos]
ENSAPLG00020004470	577.339	1369.28	1.24593	4.37163e-10	1.06684e-08	ACTN1	XP_032840462.2 alpha-actinin-1 isoform X2 [Tyto alba]
ENSAPLG00020008613	8.28933	22.4857	1.43968	4.47024e-10	1.08911e-08	Akap2	XP_038026061.1 A-kinase anchor protein 2 isoform X2 [Anas platyrhynchos]
ENSAPLG00020000852	87.5083	14.2793	-2.61549	4.54288e-10	1.10499e-08	OTUD1	XP_005009802.3 OTU domain-containing protein 1 [Anas platyrhynchos]
ENSAPLG00020007603	0.001	5.294	12.3701	4.72866e-10	1.14829e-08	Golph3	XP_027304756.1 Golgi phosphoprotein 3-like isoform X1 [Anas platyrhynchos]
ENSAPLG00020004486	24.0237	107.061	2.15591	5.26791e-10	1.27714e-08	--	XP_027316548.2 serglycin [Anas platyrhynchos]
ENSAPLG00020004538	40.087	13.799	-1.53857	5.43008e-10	1.31431e-08	GATB	XP_027312462.1 glutamyl-tRNA(Gln) amidotransferase subunit B, mitochondrial [Anas platyrhynchos]
ENSAPLG00020018215	8.499	273.609	5.00868	5.65548e-10	1.36663e-08	hsp30c	XP_038024781.1 LOW QUALITY PROTEIN: heat shock protein 30C-like [Anas platyrhynchos]
ENSAPLG00020002500	26.261	116.318	2.14708	5.75924e-10	1.38944e-08	Sema4d	XP_038026072.1 semaphorin-4D isoform X1 [Anas platyrhynchos]
ENSAPLG00020004195	7.843	23.2017	1.56475	5.7957e-10	1.39596e-08	NDNF	XP_040411962.1 protein NDNF isoform X2 [Cygnus olor]
MSTRG.11864	12.1213	3.66567	-1.7254	5.85824e-10	1.40873e-08	IGFN1	XP_038024228.1 taxid=8839 immunoglobulin-like and fibronectin type III domain-containing protein 1 isoform X2 [Anas platyrhynchos]
ENSAPLG00020000875	40.9817	91.3257	1.15604	5.95238e-10	1.42905e-08	ZBTB21	EOA96744.1 Zinc finger protein 295, partial [Anas platyrhynchos]
ENSAPLG00020004042	18.4283	2.848	-2.6939	6.02458e-10	1.44405e-08	H2-Ab1	XP_032061025.1 class II histocompatibility antigen, B-L beta chain-like [Aythya fuligula]
MSTRG.6097	3.361	11.7103	1.80082	6.53398e-10	1.56362e-08	--	KAI6076784.1 taxid=8832 putative LOC102084221 [Aix galericulata]
ENSAPLG00020010156	14.184	42.8577	1.59529	6.55959e-10	1.56721e-08	Mical2	XP_032043793.1 F-actin-monooxygenase MICAL2 isoform X5 [Aythya fuligula]
ENSAPLG00020003507	54.9797	22.4843	-1.28998	6.87352e-10	1.63957e-08	NDRG3	XP_027328770.1 protein NDRG3 isoform X1 [Anas platyrhynchos]
ENSAPLG00020003495	0.639667	5.519	3.10901	7.12501e-10	1.69683e-08	Hspa12a	EOB06742.1 Heat shock 70 kDa protein 12B, partial [Anas platyrhynchos]
ENSAPLG00020000959	43.16	95.888	1.15166	7.18365e-10	1.70805e-08	Picalm	XP_032040318.1 phosphatidylinositol-binding clathrin assembly protein isoform X1 [Aythya fuligula]
ENSAPLG00020016624	92.6667	236.718	1.35305	7.20364e-10	1.71006e-08	CBFB	XP_008109947.1 PREDICTED: core-binding factor subunit beta isoform X2 [Anolis carolinensis]
ENSAPLG00020007465	6.09733	21.2563	1.80164	7.2962e-10	1.72926e-08	FAM117A	XP_032058403.1 protein FAM117A [Aythya fuligula]
MSTRG.9759	14.3423	45.8257	1.67588	7.50895e-10	1.77684e-08	nbeal2	XP_038030044.1 taxid=8839 LOW QUALITY PROTEIN: neurobeachin-like protein 2 [Anas platyrhynchos]
ENSAPLG00020011995	1.81933	24.083	3.72653	7.9132e-10	1.86951e-08	BATF	EOB05474.1 Basic leucine zipper transcriptional factor ATF-like, partial [Anas platyrhynchos]
ENSAPLG00020002696	141.575	59.3637	-1.25392	7.95463e-10	1.87631e-08	Ints1	XP_027325041.1 integrator complex subunit 1 isoform X1 [Anas platyrhynchos]
ENSAPLG00020004177	33.7513	144.5	2.09806	8.53636e-10	2.01032e-08	CDKN1A	XP_038024143.1 cyclin-dependent kinase inhibitor 1 [Anas platyrhynchos]
ENSAPLG00020001381	6.978	1.29633	-2.42838	8.60445e-10	2.02314e-08	E2F7	XP_027310427.1 transcription factor E2F7 isoform X1 [Anas platyrhynchos]
MSTRG.20426	282.622	66.8597	-2.07967	8.64166e-10	2.02867e-08	env	XP_038041111.1 taxid=8839 uncharacterized protein LOC119718063 [Anas platyrhynchos]
ENSAPLG00020008049	76.9837	31.551	-1.28687	8.93474e-10	2.09415e-08	RAB29	XP_042689713.1 ras-related protein Rab-7L1 [Centrocercus urophasianus]
ENSAPLG00020017943	0.530333	7.50267	3.82243	9.08992e-10	2.12716e-08	KIAA1211L	XP_027321066.2 acrosomal protein KIAA1210 homolog isoform X3 [Anas platyrhynchos]
ENSAPLG00020005184	2.65733	12.9747	2.28765	9.29565e-10	2.17187e-08	SLX4IP	XP_027309167.1 protein SLX4IP isoform X7 [Anas platyrhynchos]
ENSAPLG00020004612	53.4257	159.552	1.57842	9.56706e-10	2.23176e-08	MX	ALF04450.1 Mx [Anas platyrhynchos]
ENSAPLG00020001255	96.187	40.306	-1.25485	9.68195e-10	2.25501e-08	rnaseh2b	XP_027327042.1 ribonuclease H2 subunit B isoform X1 [Anas platyrhynchos]
ENSAPLG00020001969	2.26033	10.2867	2.18617	9.77173e-10	2.27235e-08	DDB2	XP_038036415.1 DNA damage-binding protein 2 [Anas platyrhynchos]
ENSAPLG00020011260	99.4787	36.9683	-1.4281	1.00472e-09	2.33212e-08	MEMO1	XP_027309673.1 protein MEMO1 isoform X2 [Anas platyrhynchos]
ENSAPLG00020010779	19.3563	51.9793	1.42513	1.00603e-09	2.33212e-08	CD69	XP_038043850.1 C-type lectin domain family 2 member B-like isoform X2 [Anas platyrhynchos]
ENSAPLG00020011024	0.001	4.38433	12.0981	1.03947e-09	2.40589e-08	GPBP1	XP_027303574.2 vasculin isoform X1 [Anas platyrhynchos]
ENSAPLG00020010371	0.100333	5.84567	5.86449	1.04965e-09	2.42566e-08	--	XP_005018366.1 L-amino-acid oxidase [Anas platyrhynchos]
ENSAPLG00020014586	0.001	3.06067	11.5796	1.07953e-09	2.49082e-08	Dnajb5	XP_038025451.1 dnaJ homolog subfamily B member 5-like isoform X1 [Anas platyrhynchos]
ENSAPLG00020013848	47.6123	143.846	1.59512	1.11291e-09	2.56385e-08	BID	XP_032051014.1 BH3-interacting domain death agonist [Aythya fuligula]
MSTRG.1573	22.468	7.51167	-1.58067	1.14373e-09	2.63076e-08	CTC1	XP_027305466.2 taxid=8839 LOW QUALITY PROTEIN: CST complex subunit CTC1 [Anas platyrhynchos]
ENSAPLG00020004419	7.68433	44.62	2.5377	1.19877e-09	2.75309e-08	GPX2	XP_040416225.1 glutathione peroxidase 2 [Cygnus olor]
ENSAPLG00020006985	37.359	9.401	-1.99057	1.21448e-09	2.78484e-08	B4GALT4	EOB02982.1 Beta-1,4-galactosyltransferase 4, partial [Anas platyrhynchos]
ENSAPLG00020001859	1.00533	28.318	4.81597	1.25618e-09	2.87602e-08	IFITM3	NP_001297752.1 interferon-induced transmembrane protein 1 [Anas platyrhynchos]
ENSAPLG00020013126	107.451	35.5253	-1.59676	1.26227e-09	2.88549e-08	Slc49a4	XP_005017587.3 solute carrier family 49 member 4 isoform X1 [Anas platyrhynchos]
MSTRG.5662	6.35433	24.4447	1.94371	1.32597e-09	3.02643e-08	--	EOB01762.1 taxid=8839 hypothetical protein Anapl_14448 [Anas platyrhynchos]
ENSAPLG00020008157	225.62	80.845	-1.48066	1.33838e-09	3.05006e-08	AP3B1	XP_032062025.1 AP-3 complex subunit beta-1 isoform X5 [Aythya fuligula]
ENSAPLG00020018200	106.611	280.897	1.39768	1.35838e-09	3.09089e-08	PARP12	XP_027304927.2 protein mono-ADP-ribosyltransferase PARP12 [Anas platyrhynchos]
ENSAPLG00020008529	0.882667	15.733	4.15578	1.3631e-09	3.09688e-08	F2R	XP_038027409.1 proteinase-activated receptor 1 [Anas platyrhynchos]
ENSAPLG00020001536	13.3837	2.40433	-2.47676	1.37253e-09	3.11351e-08	EFHC1	XP_027311171.2 EF-hand domain-containing protein 1 [Anas platyrhynchos]
ENSAPLG00020015016	2.74433	24.5853	3.16327	1.43724e-09	3.25532e-08	ZAP70	XP_005029244.1 tyrosine-protein kinase ZAP-70 [Anas platyrhynchos]
ENSAPLG00020011444	32.4057	8.68033	-1.90042	1.50059e-09	3.39362e-08	PFKFB2	XP_027300564.2 6-phosphofructo-2-kinase/fructose-2,6-bisphosphatase 2 isoform X4 [Anas platyrhynchos]
ENSAPLG00020017965	12.216	46.8327	1.93874	1.55125e-09	3.50286e-08	COBLL1	XP_038037962.1 cordon-bleu protein-like 1 isoform X3 [Anas platyrhynchos]
MSTRG.20645	15.339	41.407	1.43267	1.58047e-09	3.5634e-08	--	XP_038040067.1 taxid=8839 uncharacterized protein LOC113841911 [Anas platyrhynchos]
ENSAPLG00020000150	80.1093	33.8063	-1.24468	1.6154e-09	3.63662e-08	CLPTM1L	XP_027307622.1 cleft lip and palate transmembrane protein 1-like protein [Anas platyrhynchos]
ENSAPLG00020012534	1118.07	2430.57	1.12029	1.63163e-09	3.66759e-08	PGK	XP_005015253.2 phosphoglycerate kinase 1 [Anas platyrhynchos]
ENSAPLG00020016610	54.0973	163.218	1.59317	1.72144e-09	3.8636e-08	Osgin1	XP_038041228.1 oxidative stress-induced growth inhibitor 1 [Anas platyrhynchos]
ENSAPLG00020003750	10.3007	52.903	2.36061	1.72519e-09	3.86615e-08	GAS6	XP_032055533.1 growth arrest-specific protein 6 [Aythya fuligula]
ENSAPLG00020002296	36.3357	110.402	1.6033	1.73053e-09	3.87225e-08	PXK	XP_032049758.1 PX domain-containing protein kinase-like protein isoform X1 [Aythya fuligula]
ENSAPLG00020009305	538.386	1667.56	1.63102	1.77651e-09	3.96915e-08	IFI35	XP_038024700.1 LOW QUALITY PROTEIN: interferon-induced 35 kDa protein [Anas platyrhynchos]
ENSAPLG00020012652	10.0353	32.2077	1.68232	1.79988e-09	4.01531e-08	USP45	XP_027310601.2 LOW QUALITY PROTEIN: ubiquitin carboxyl-terminal hydrolase 45 [Anas platyrhynchos]
ENSAPLG00020008341	0.0976667	6.85867	6.13392	1.80616e-09	4.02326e-08	FSTL3	XP_032059618.1 follistatin-related protein 3 [Aythya fuligula]
ENSAPLG00020015256	33.9803	9.28633	-1.87152	1.83147e-09	4.07352e-08	CHST2	XP_035190665.1 LOW QUALITY PROTEIN: carbohydrate sulfotransferase 2, partial [Oxyura jamaicensis]
ENSAPLG00020012163	41.3047	15.1973	-1.44249	1.91735e-09	4.25813e-08	SLC35B4	XP_027317156.1 UDP-xylose and UDP-N-acetylglucosamine transporter isoform X1 [Anas platyrhynchos]
ENSAPLG00020002379	3.06333	22.07	2.84891	1.99793e-09	4.43045e-08	GRAP2	XP_027306768.2 GRB2-related adapter protein 2 isoform X1 [Anas platyrhynchos]
ENSAPLG00020007799	0.578	9.576	4.05028	2.08231e-09	4.61065e-08	TBXA2R	XP_038025007.1 thromboxane A2 receptor [Anas platyrhynchos]
ENSAPLG00020012854	36.86	16.9647	-1.11952	2.18858e-09	4.83873e-08	MTOR	XP_035200269.1 serine/threonine-protein kinase mTOR isoform X1 [Oxyura jamaicensis]
MSTRG.2134	0.001	4.297	12.0691	2.20921e-09	4.87706e-08	--	EOB06512.1 taxid=8839 hypothetical protein Anapl_03670 [Anas platyrhynchos]
ENSAPLG00020002230	69.2753	150.322	1.11764	2.27013e-09	4.99817e-08	ODC1	XP_027311026.1 ornithine decarboxylase [Anas platyrhynchos]
ENSAPLG00020001850	45.2777	20.251	-1.16081	2.27082e-09	4.99817e-08	GART	EOB05538.1 Trifunctional purine biosynthetic protein adenosine-3, partial [Anas platyrhynchos]
ENSAPLG00020008820	179.273	68.04	-1.39771	2.31973e-09	5.09824e-08	ERLIN2	XP_038022836.1 erlin-2 [Anas platyrhynchos]
ENSAPLG00020002398	87.948	39.7707	-1.14495	2.36011e-09	5.17931e-08	CBL	XP_027300206.2 E3 ubiquitin-protein ligase CBL [Anas platyrhynchos]
ENSAPLG00020014798	59.0123	15.166	-1.96018	2.38648e-09	5.2249e-08	CMTM8	XP_035174444.1 CKLF-like MARVEL transmembrane domain-containing protein 8 [Oxyura jamaicensis]
ENSAPLG00020002255	14.7567	49.7873	1.75441	2.38794e-09	5.2249e-08	ENG	XP_038021092.1 LOW QUALITY PROTEIN: endoglin [Anas platyrhynchos]
ENSAPLG00020008352	26.7703	6.064	-2.14229	2.41139e-09	5.26843e-08	TNFAIP8L1	XP_035204094.1 tumor necrosis factor alpha-induced protein 8-like protein 1 isoform X2 [Oxyura jamaicensis]
ENSAPLG00020016046	72.4467	25.5147	-1.50559	2.47122e-09	5.39119e-08	Slc12a7	XP_040403336.1 solute carrier family 12 member 7 isoform X5 [Cygnus olor]
ENSAPLG00020003067	0.664667	12.2073	4.19897	2.52346e-09	5.49174e-08	Ighm	AAA68605.1 IgM heavy chain, constant region domains one, two, three and four, partial [Anas platyrhynchos]
ENSAPLG00020003248	664.487	1360.27	1.03358	2.52472e-09	5.49174e-08	HSPA5	XP_038020867.1 endoplasmic reticulum chaperone BiP [Anas platyrhynchos]
ENSAPLG00020006174	12.4963	36.957	1.56434	2.56256e-09	5.56587e-08	RAD50	XP_038042461.1 LOW QUALITY PROTEIN: DNA repair protein RAD50 [Anas platyrhynchos]
ENSAPLG00020004550	0.325	40.5	6.96134	2.57272e-09	5.57974e-08	Plac8	XP_012949338.1 LOW QUALITY PROTEIN: placenta-specific gene 8 protein [Anas platyrhynchos]
ENSAPLG00020006438	173.761	82.0187	-1.08308	2.62462e-09	5.684e-08	GOT1	XP_027316535.1 aspartate aminotransferase, cytoplasmic [Anas platyrhynchos]
MSTRG.19285	4.62233	21.793	2.23717	2.63101e-09	5.68951e-08	--	RLW06002.1 taxid=44316 hypothetical protein DV515_00004998 [Chloebia gouldiae]
ENSAPLG00020016126	0.514667	8.43	4.03382	2.64042e-09	5.69908e-08	GCNT7	XP_005010467.2 beta-1,3-galactosyl-O-glycosyl-glycoprotein beta-1,6-N-acetylglucosaminyltransferase 7 [Anas platyrhynchos]
ENSAPLG00020017229	0.254333	5.65	4.47346	2.64313e-09	5.69908e-08	SLC6A4	XP_005023199.3 sodium-dependent serotonin transporter [Anas platyrhynchos]
ENSAPLG00020007756	175.588	545.219	1.63464	2.7333e-09	5.88495e-08	ATP1B1	NP_001297315.1 sodium/potassium-transporting ATPase subunit beta-1 [Anas platyrhynchos]
ENSAPLG00020000621	6.24667	150.657	4.59204	2.75772e-09	5.92891e-08	Mas1	XP_038036565.1 proto-oncogene Mas isoform X1 [Anas platyrhynchos]
ENSAPLG00020001306	70.9863	160.647	1.17828	2.77598e-09	5.95146e-08	CD81	XP_027314310.1 CD81 antigen [Anas platyrhynchos]
MSTRG.289	0.001	4.734	12.2088	2.78005e-09	5.95146e-08	--	-
ENSAPLG00020007632	2.46733	191.598	6.27899	2.78027e-09	5.95146e-08	--	XP_038026964.1 eotaxin-like [Anas platyrhynchos]
ENSAPLG00020012760	0.297333	11.3423	5.25349	2.87329e-09	6.14172e-08	PLEKHG1	EOB09158.1 hypothetical protein Anapl_05316, partial [Anas platyrhynchos]
ENSAPLG00020012792	16.2793	82.3343	2.33845	2.88204e-09	6.15154e-08	OVOS2	XP_005030047.1 ovostatin [Anas platyrhynchos]
ENSAPLG00020002595	36.8653	13.2967	-1.4712	2.95599e-09	6.3003e-08	NEDD4L	XP_005023429.4 E3 ubiquitin-protein ligase NEDD4-like isoform X1 [Anas platyrhynchos]
ENSAPLG00020016423	0.022	2.242	6.67114	3.04854e-09	6.48823e-08	TNC	XP_040387719.1 tenascin isoform X1 [Cygnus olor]
MSTRG.4963	0.521667	3.155	2.59644	3.23524e-09	6.8757e-08	CMTR2	XP_027321826.1 taxid=8839 cap-specific mRNA (nucleoside-2'-O-)-methyltransferase 2 [Anas platyrhynchos]
ENSAPLG00020011020	0.001	3.43967	11.7481	3.25878e-09	6.9158e-08	MIER3	XP_027304716.1 mesoderm induction early response protein 3-like isoform X1 [Anas platyrhynchos]
ENSAPLG00020008894	9.094	2.22133	-2.03349	3.27215e-09	6.93424e-08	Crym	XP_027325365.1 ketimine reductase mu-crystallin isoform X2 [Anas platyrhynchos]
ENSAPLG00020008268	3.83567	20.2703	2.40182	3.30488e-09	6.9936e-08	HOMER3	XP_027328222.1 homer protein homolog 3 isoform X2 [Anas platyrhynchos]
MSTRG.3054	10.0463	3.03633	-1.72627	3.3197e-09	7.01495e-08	ARHGAP42	KFO92471.1 taxid=175836 Rho GTPase-activating protein 42, partial [Buceros rhinoceros silvestris]
ENSAPLG00020010138	50.2597	144.865	1.52723	3.44687e-09	7.27329e-08	CCT7	XP_027311654.1 LOW QUALITY PROTEIN: T-complex protein 1 subunit eta [Anas platyrhynchos]
ENSAPLG00020014357	49.4607	128.446	1.37681	3.51602e-09	7.40865e-08	rasgef1a	XP_027315819.1 ras-GEF domain-containing family member 1A isoform X3 [Anas platyrhynchos]
ENSAPLG00020007879	209.751	67.0517	-1.64533	3.52916e-09	7.4153e-08	micos13	XP_027328390.1 MICOS complex subunit MIC13 [Anas platyrhynchos]
MSTRG.472	37.2267	78.848	1.08274	3.52919e-09	7.4153e-08	env	KAK4806844.1 taxid=33587 LOW QUALITY PROTEIN: hypothetical protein QYF61_012565 [Mycteria americana]
ENSAPLG00020005268	97.916	45.6253	-1.10171	3.53507e-09	7.41713e-08	CDK7	XP_038026098.1 cyclin-dependent kinase 7 isoform X1 [Anas platyrhynchos]
MSTRG.10859	0.001	3.066	11.5821	3.58817e-09	7.51791e-08	Dcaf12	XP_038025564.1 taxid=8839 DDB1- and CUL4-associated factor 12-like isoform X2 [Anas platyrhynchos]
ENSAPLG00020000937	0.404333	5.489	3.76293	3.64964e-09	7.63589e-08	Cobl	XP_038029944.1 protein cordon-bleu isoform X10 [Anas platyrhynchos]
ENSAPLG00020009534	104.156	32.9243	-1.66152	3.73636e-09	7.80631e-08	Ak6	EOB07780.1 Adenylate kinase isoenzyme 6, partial [Anas platyrhynchos]
ENSAPLG00020015249	1.04167	8.18433	2.97397	3.81087e-09	7.95076e-08	PCOLCE2	XP_032049445.1 procollagen C-endopeptidase enhancer 2 [Aythya fuligula]
ENSAPLG00020010940	907.689	2276.1	1.3263	3.82673e-09	7.9663e-08	SAT1	XP_032063414.1 diamine acetyltransferase 1 [Aythya fuligula]
ENSAPLG00020012879	0.956667	4.98	2.38006	3.82907e-09	7.9663e-08	Casz1	XP_040389201.1 zinc finger protein castor homolog 1 isoform X3 [Cygnus olor]
ENSAPLG00020014024	1045.56	441.559	-1.2436	3.89125e-09	8.0843e-08	M6PR	XP_027305683.1 cation-dependent mannose-6-phosphate receptor [Anas platyrhynchos]
ENSAPLG00020010806	0.001	13.0877	13.6759	3.90707e-09	8.10581e-08	--	XP_038025341.1 histidine triad nucleotide-binding protein 1-like isoform X3 [Anas platyrhynchos]
ENSAPLG00020010608	0.239667	7.02233	4.87285	3.92668e-09	8.13509e-08	TRIM27	EOB02159.1 Zinc finger protein RFP [Anas platyrhynchos]
ENSAPLG00020014659	2.56033	13.485	2.39695	3.9885e-09	8.25164e-08	RGS4	XP_012960053.1 regulator of G-protein signaling 4 isoform X2 [Anas platyrhynchos]
ENSAPLG00020007730	66.994	240.096	1.84151	4.11595e-09	8.50343e-08	LMNA	XP_005021763.3 LOW QUALITY PROTEIN: lamin [Anas platyrhynchos]
ENSAPLG00020009058	89.9993	39.5133	-1.18757	4.13545e-09	8.53181e-08	UTP15	XP_027302237.1 U3 small nucleolar RNA-associated protein 15 homolog [Anas platyrhynchos]
ENSAPLG00020000368	20.5013	6.89533	-1.57203	4.1956e-09	8.64387e-08	Poglut3	XP_027324318.1 protein O-glucosyltransferase 3 [Anas platyrhynchos]
MSTRG.10467	0.0256667	5.66333	7.78561	4.27856e-09	8.80255e-08	Plekhn1	XP_027298974.2 taxid=8839 LOW QUALITY PROTEIN: pleckstrin homology domain-containing family N member 1 [Anas platyrhynchos]
ENSAPLG00020018088	51.2927	119.267	1.21737	4.36394e-09	8.96575e-08	Spsb1	XP_005015482.1 SPRY domain-containing SOCS box protein 1 [Anas platyrhynchos]
ENSAPLG00020007431	76.2577	214.893	1.49466	4.37938e-09	8.985e-08	Suds3	XP_027325762.1 sin3 histone deacetylase corepressor complex component SDS3 [Anas platyrhynchos]
ENSAPLG00020016138	112.081	335.559	1.58202	4.46603e-09	9.15011e-08	tor4a-a	XP_038020919.1 torsin-4A isoform X2 [Anas platyrhynchos]
ENSAPLG00020015814	65.7673	24.3367	-1.43424	4.48154e-09	9.16921e-08	TRMU	XP_027314629.1 mitochondrial tRNA-specific 2-thiouridylase 1 [Anas platyrhynchos]
ENSAPLG00020006637	126.182	333.893	1.40388	4.69601e-09	9.59476e-08	HIF1A	XP_027314925.2 hypoxia-inducible factor 1-alpha isoform X4 [Anas platyrhynchos]
regulation of vasculature development;GO:1904951//positive regulation of establishment of protein localization;GO:2000026//regulation of multicellular organismal development;GO:2000106//regulation of leukocyte apoptotic process;GO:2000107//negative regulation of leukocyte apoptotic process;GO:2000112//regulation of cellular macromolecule biosynthetic process;GO:2000113//negative regulation of cel…
ENSAPLG00020016726	2.95267	16.6863	2.49858	4.7631e-09	9.71843e-08	FA2H	XP_032051396.1 fatty acid 2-hydroxylase [Aythya fuligula]
ENSAPLG00020014304	0.593	9.01667	3.92649	4.84321e-09	9.85889e-08	KCNMA1	XP_015143645.1 calcium-activated potassium channel subunit alpha-1 isoform X17 [Gallus gallus]
ENSAPLG00020003385	7.44233	1.989	-1.90371	4.84525e-09	9.85889e-08	PAPLN	XP_032045276.1 papilin [Aythya fuligula]
ENSAPLG00020010852	0.001	3.05633	11.5776	4.85497e-09	9.86512e-08	Gnaq	XP_032062804.1 guanine nucleotide-binding protein G(q) subunit alpha-like [Aythya fuligula]
MSTRG.21368	14.2563	4.73833	-1.58915	5.06161e-09	1.0267e-07	--	-
ENSAPLG00020015768	14.374	58.2123	2.01786	5.06659e-09	1.0267e-07	CISH	XP_005026511.1 cytokine-inducible SH2-containing protein [Anas platyrhynchos]
ENSAPLG00020011230	412.855	184.216	-1.16424	5.24617e-09	1.06163e-07	MOB1A	XP_025899212.1 MOB kinase activator 1A [Nothoprocta perdicaria]
ENSAPLG00020013732	25.8923	6.68933	-1.95259	5.35866e-09	1.08292e-07	THSD4	XP_005025485.2 thrombospondin type-1 domain-containing protein 4 isoform X1 [Anas platyrhynchos]
ENSAPLG00020016131	681.896	233.55	-1.54582	5.50444e-09	1.11086e-07	Ncf1	XP_005017825.3 neutrophil cytosol factor 1 [Anas platyrhynchos]
ENSAPLG00020015386	0.346333	21.8327	5.97818	5.66287e-09	1.14128e-07	--	XP_027318448.1 tumor necrosis factor ligand superfamily member 4 [Anas platyrhynchos]
ENSAPLG00020007275	67.0433	29.7233	-1.1735	5.77611e-09	1.16252e-07	Slc12a9	XP_038039674.1 solute carrier family 12 member 9 isoform X2 [Anas platyrhynchos]
ENSAPLG00020002174	0.001	2.742	11.421	5.80618e-09	1.16699e-07	ZNF131	XP_038025404.1 zinc finger protein 131 isoform X1 [Anas platyrhynchos]
MSTRG.20872	13.4467	3.741	-1.84575	5.87107e-09	1.17843e-07	--	XP_038025345.1 taxid=8839 uncharacterized protein LOC113841927 isoform X7 [Anas platyrhynchos]
ENSAPLG00020008372	0.467	6.58733	3.8182	5.92666e-09	1.18798e-07	CARMIL1	XP_032038825.1 F-actin-uncapping protein LRRC16A isoform X1 [Aythya fuligula]
ENSAPLG00020000904	125.638	325.949	1.37538	6.00069e-09	1.20119e-07	TAX1BP1	XP_027306779.1 tax1-binding protein 1 isoform X1 [Anas platyrhynchos]
ENSAPLG00020006397	48.0313	15.908	-1.59422	6.22949e-09	1.24531e-07	Hgsnat	XP_027311927.2 heparan-alpha-glucosaminide N-acetyltransferase [Anas platyrhynchos]
ENSAPLG00020017940	14.3667	3.65033	-1.97663	6.44797e-09	1.28725e-07	Akap17b	XP_027321053.2 A-kinase anchor protein 17B isoform X1 [Anas platyrhynchos]
ENSAPLG00020012094	347.432	131.277	-1.40411	6.49617e-09	1.29513e-07	GRN	XP_032058649.1 progranulin isoform X1 [Aythya fuligula]
ENSAPLG00020008784	2.81	10.3787	1.88498	6.52677e-09	1.29948e-07	ZEB1	XP_038029704.1 zinc finger E-box-binding homeobox 1 isoform X1 [Anas platyrhynchos]
ENSAPLG00020014700	54.0767	23.311	-1.214	6.56062e-09	1.30446e-07	SGK3	EOB01521.1 Serine/threonine-protein kinase Sgk3, partial [Anas platyrhynchos]
ENSAPLG00020010252	17.4537	6.52133	-1.42029	6.68344e-09	1.32577e-07	EXD3	XP_038043954.1 exonuclease mut-7 homolog isoform X1 [Anas platyrhynchos]
ENSAPLG00020016238	15.065	45.0253	1.57954	6.68569e-09	1.32577e-07	NUGGC	XP_032040415.1 nuclear GTPase SLIP-GC-like [Aythya fuligula]
ENSAPLG00020013753	0.855	8.15867	3.25434	6.75015e-09	1.33529e-07	TJP1	XP_038040827.1 tight junction protein ZO-1 isoform X1 [Anas platyrhynchos]
ENSAPLG00020015622	120.272	53.6873	-1.16365	6.75174e-09	1.33529e-07	SMIM14	XP_027313032.2 small integral membrane protein 14 [Anas platyrhynchos]
ENSAPLG00020003654	20.143	63.3337	1.65269	6.84732e-09	1.35239e-07	ALS2CL	XP_032039233.1 ALS2 C-terminal-like protein isoform X2 [Aythya fuligula]
ENSAPLG00020010052	85.686	36.0333	-1.24973	6.88496e-09	1.3575e-07	POMT1	XP_005013301.3 protein O-mannosyl-transferase 1 [Anas platyrhynchos]
ENSAPLG00020010888	121.38	289.49	1.25399	6.89152e-09	1.3575e-07	Zc3h12a	XP_027299850.1 LOW QUALITY PROTEIN: endoribonuclease ZC3H12A [Anas platyrhynchos]
ENSAPLG00020009061	0.044	1.23867	4.81514	7.11687e-09	1.40003e-07	PDZD2	XP_038026374.1 PDZ domain-containing protein 2 isoform X2 [Anas platyrhynchos]
ENSAPLG00020010428	5.66067	0.734333	-2.94646	7.13832e-09	1.40239e-07	EYA2	XP_027298643.1 eyes absent homolog 2 isoform X1 [Anas platyrhynchos]
MSTRG.1796	21.587	45.793	1.08496	7.18389e-09	1.40947e-07	IGSF3	XP_027305160.2 taxid=8839 immunoglobulin superfamily member 3 isoform X2 [Anas platyrhynchos]
ENSAPLG00020017312	58.6063	15.1133	-1.95523	7.20047e-09	1.41085e-07	BLNK	XP_005013682.2 B-cell linker protein isoform X1 [Anas platyrhynchos]
ENSAPLG00020001445	9.55567	32.956	1.78611	7.54997e-09	1.47738e-07	Uck2	XP_027751722.1 uridine-cytidine kinase 2 [Empidonax traillii]
ENSAPLG00020008705	276.095	109.856	-1.32955	7.6825e-09	1.50133e-07	CD1D	XP_012962961.3 antigen-presenting glycoprotein CD1d isoform X1 [Anas platyrhynchos]
ENSAPLG00020013901	1065.68	502.279	-1.08521	7.80218e-09	1.52271e-07	CXCR4	XP_027317671.1 C-X-C chemokine receptor type 4 [Anas platyrhynchos]
ENSAPLG00020004341	15.194	41.7837	1.45944	7.91701e-09	1.54309e-07	USP53	XP_038034785.1 inactive ubiquitin carboxyl-terminal hydrolase 53 [Anas platyrhynchos]
ENSAPLG00020004746	1.86933	16.6767	3.15724	8.04578e-09	1.5649e-07	DCLK2	XP_038033948.1 serine/threonine-protein kinase DCLK2 isoform X2 [Anas platyrhynchos]
ENSAPLG00020009293	37.151	96.642	1.37925	8.05004e-09	1.5649e-07	CREM	XP_027306291.1 cAMP-responsive element modulator isoform X4 [Anas platyrhynchos]
ENSAPLG00020002396	6.90233	22.2427	1.68817	8.27903e-09	1.6073e-07	MALT1	XP_032061403.1 mucosa-associated lymphoid tissue lymphoma translocation protein 1 [Aythya fuligula]
MSTRG.2294	0.494	4.98467	3.33491	8.32419e-09	1.61396e-07	--	XP_040422583.1 taxid=8869 translation initiation factor IF-2-like [Cygnus olor]
ENSAPLG00020013529	21.9733	87.1237	1.98731	8.5217e-09	1.65009e-07	MAP2K3	XP_040430280.1 dual specificity mitogen-activated protein kinase kinase 3 isoform X1 [Cygnus olor]
ENSAPLG00020007853	37.878	9.37433	-2.01457	8.94173e-09	1.72913e-07	Slc25a4	XP_038033896.1 ADP/ATP translocase 1 [Anas platyrhynchos]
ENSAPLG00020009309	1165.79	536.13	-1.12066	8.95325e-09	1.72913e-07	CP37	XP_038026938.1 annexin A1 [Anas platyrhynchos]
ENSAPLG00020008211	21.3193	4.41433	-2.27189	9.03224e-09	1.74212e-07	Ptchd3	XP_027306392.2 patched domain-containing protein 3 [Anas platyrhynchos]
ENSAPLG00020011713	23.305	6.31667	-1.8834	9.39317e-09	1.80938e-07	SCFD2	XP_027312883.1 sec1 family domain-containing protein 2 [Anas platyrhynchos]
ENSAPLG00020000441	5.713	35.3277	2.62848	9.53603e-09	1.83451e-07	CHAC1	XP_027315366.2 LOW QUALITY PROTEIN: glutathione-specific gamma-glutamylcyclotransferase 1 [Anas platyrhynchos]
ENSAPLG00020009574	25.1667	7.24067	-1.79732	9.56083e-09	1.83689e-07	OXCT1	XP_032061260.1 succinyl-CoA:3-ketoacid coenzyme A transferase 1, mitochondrial [Aythya fuligula]
ENSAPLG00020013402	5.404	0.790333	-2.77349	9.81002e-09	1.88233e-07	Pgap1	XP_027317593.2 GPI inositol-deacylase isoform X1 [Anas platyrhynchos]
MSTRG.821	88.3633	28.2773	-1.6438	1.00323e-08	1.92249e-07	MROH1	XP_032038343.1 taxid=219594 maestro heat-like repeat-containing protein family member 1 isoform X1 [Aythya fuligula]
ENSAPLG00020005282	4.877	0.443333	-3.45953	1.01164e-08	1.93609e-07	SLCO1C1	XP_005017123.2 solute carrier organic anion transporter family member 1C1 isoform X1 [Anas platyrhynchos]
ENSAPLG00020000746	128.041	52.75	-1.27937	1.09354e-08	2.09013e-07	GALNT1	NP_001006381.1 polypeptide N-acetylgalactosaminyltransferase 1 [Gallus gallus]
MSTRG.2870	133.091	322.623	1.27744	1.09974e-08	2.09929e-07	--	-
ENSAPLG00020002100	94.5703	226.551	1.26037	1.11297e-08	2.12181e-07	SLC16A3	XP_027327340.1 monocarboxylate transporter 4 [Anas platyrhynchos]
ENSAPLG00020007457	87.5507	34.8077	-1.33071	1.16437e-08	2.21695e-07	Itga4	XP_027316882.2 integrin alpha-4 isoform X1 [Anas platyrhynchos]
ENSAPLG00020014342	131.151	59.416	-1.1423	1.19664e-08	2.27546e-07	--	XP_005015805.2 transmembrane protein 254 [Anas platyrhynchos]
ENSAPLG00020007945	12.552	4.60633	-1.44623	1.20628e-08	2.29084e-07	PTPRS	XP_035423642.1 receptor-type tyrosine-protein phosphatase S isoform X2 [Cygnus atratus]
ENSAPLG00020008973	9.03433	2.12367	-2.08886	1.21014e-08	2.29523e-07	ARHGEF28	XP_038026755.1 rho guanine nucleotide exchange factor 28 isoform X3 [Anas platyrhynchos]
ENSAPLG00020011828	72.9923	32.6427	-1.16099	1.21222e-08	2.29624e-07	ZER1	XP_013054138.1 PREDICTED: protein zer-1 homolog [Anser cygnoides domesticus]
ENSAPLG00020000429	0.001	4.25267	12.0542	1.21458e-08	2.29777e-07	Dll4	XP_027315365.1 delta-like protein 4 [Anas platyrhynchos]
ENSAPLG00020004743	136.743	53.6233	-1.35053	1.24087e-08	2.34451e-07	Atp11a	XP_005021886.1 probable phospholipid-transporting ATPase IH isoform X1 [Anas platyrhynchos]
ENSAPLG00020006243	14.353	2.47667	-2.53488	1.25625e-08	2.37055e-07	RARRES1	XP_027319708.1 LOW QUALITY PROTEIN: retinoic acid receptor responder protein 1 [Anas platyrhynchos]
ENSAPLG00020003611	81.937	29.744	-1.46192	1.28113e-08	2.41442e-07	GSTM2	XP_042656151.1 glutathione S-transferase 2-like [Tyto alba]
ENSAPLG00020005628	0.375	5.19167	3.79124	1.32371e-08	2.49149e-07	ERG	XP_032063909.1 transcriptional regulator ERG isoform X1 [Aythya fuligula]
ENSAPLG00020013736	32.757	12.4223	-1.39887	1.3327e-08	2.50524e-07	BDH1	XP_038039505.1 D-beta-hydroxybutyrate dehydrogenase, mitochondrial [Anas platyrhynchos]
ENSAPLG00020004907	9.291	21.7623	1.22793	1.3632e-08	2.55932e-07	pol	XP_014810274.1 PREDICTED: uncharacterized protein LOC106895380 [Calidris pugnax]
MSTRG.5017	0.001	2.10833	11.0419	1.38826e-08	2.60308e-07	--	XP_005030979.3 taxid=8839 fractalkine [Anas platyrhynchos]
ENSAPLG00020006857	181.494	62.622	-1.53518	1.39318e-08	2.609e-07	PPFIBP1	XP_027305828.1 liprin-beta-1 isoform X2 [Anas platyrhynchos]
ENSAPLG00020008849	33.1703	74.07	1.159	1.40308e-08	2.62422e-07	LRP3	XP_027322767.1 low-density lipoprotein receptor-related protein 3 isoform X4 [Anas platyrhynchos]
ENSAPLG00020007712	582.113	244.286	-1.25273	1.42057e-08	2.65359e-07	ARSB	XP_038027283.1 arylsulfatase B [Anas platyrhynchos]
ENSAPLG00020001237	4.591	28.218	2.61974	1.4387e-08	2.68406e-07	kcnrg	XP_005015298.1 potassium channel regulatory protein [Anas platyrhynchos]
ENSAPLG00020014867	125.664	301.209	1.2612	1.44901e-08	2.6999e-07	DDA1	XP_010223998.1 PREDICTED: DET1- and DDB1-associated protein 1 [Tinamus guttatus]
ENSAPLG00020003010	31.8787	13.015	-1.29242	1.4535e-08	2.70486e-07	ARHGAP20	XP_038040565.1 rho GTPase-activating protein 20-like isoform X1 [Anas platyrhynchos]
ENSAPLG00020012777	1.57433	7.30167	2.21348	1.46989e-08	2.73193e-07	PTPRU	XP_038023270.1 receptor-type tyrosine-protein phosphatase U isoform X2 [Anas platyrhynchos]
ENSAPLG00020014395	25.001	61.9197	1.30841	1.47287e-08	2.73403e-07	Traf1	XP_027326469.1 TNF receptor-associated factor 1 isoform X3 [Anas platyrhynchos]
ENSAPLG00020007769	526.949	154.13	-1.77352	1.53169e-08	2.83778e-07	Havcr1	XP_032052829.1 hepatitis A virus cellular receptor 1 homolog isoform X1 [Aythya fuligula]
ENSAPLG00020017003	0.165333	7.991	5.59493	1.5332e-08	2.83778e-07	PPM1E	XP_027327751.2 protein phosphatase 1E isoform X1 [Anas platyrhynchos]
ENSAPLG00020014042	9.73467	1.99567	-2.28626	1.5345e-08	2.83778e-07	RIMKLB	XP_024998537.1 beta-citrylglutamate synthase B isoform X2 [Gallus gallus]
MSTRG.13790	0.001	5.537	12.4349	1.55025e-08	2.86333e-07	--	-
ENSAPLG00020008086	52.0223	19.6993	-1.40098	1.56311e-08	2.88348e-07	Spata13	XP_005022631.1 spermatogenesis-associated protein 13 isoform X5 [Anas platyrhynchos]
ENSAPLG00020015091	35.327	10.3197	-1.77537	1.61076e-08	2.96769e-07	SIAH2	XP_038039672.1 LOW QUALITY PROTEIN: E3 ubiquitin-protein ligase SIAH2 [Anas platyrhynchos]
ENSAPLG00020011602	16.051	5.69567	-1.49473	1.62596e-08	2.99198e-07	FARP1	XP_040394265.1 FERM, ARHGEF and pleckstrin domain-containing protein 1 isoform X1 [Cygnus olor]
ENSAPLG00020010713	76.0423	34.0263	-1.16015	1.62829e-08	2.99253e-07	NELFA	XP_035180941.1 negative elongation factor A isoform X1 [Oxyura jamaicensis]
ENSAPLG00020016880	8.31167	60.1463	2.85527	1.67425e-08	3.0732e-07	TRGC1	NP_001297751.1 TCR gamma alternate reading frame protein precursor [Anas platyrhynchos]
ENSAPLG00020013776	1.89833	20.7687	3.4516	1.68931e-08	3.09701e-07	Gpr35	XP_005028658.2 G-protein coupled receptor 35 [Anas platyrhynchos]
ENSAPLG00020010580	0.159	5.31	5.06161	1.70492e-08	3.12175e-07	CD163	XP_038028666.1 LOW QUALITY PROTEIN: scavenger receptor cysteine-rich type 1 protein M130-like [Anas platyrhynchos]
ENSAPLG00020006289	47.2277	11.2457	-2.07026	1.74137e-08	3.18455e-07	VSIR	XP_013028263.1 PREDICTED: platelet receptor Gi24 isoform X1 [Anser cygnoides domesticus]
MSTRG.8382	187.891	84.4283	-1.1541	1.76327e-08	3.22062e-07	RAB10	XP_038029931.1 taxid=8839 ras-related protein Rab-10 isoform X3 [Anas platyrhynchos]
ENSAPLG00020002793	221.478	624.136	1.4947	1.77333e-08	3.23502e-07	NAMPT	XP_009985471.1 PREDICTED: nicotinamide phosphoribosyltransferase, partial [Tauraco erythrolophus]
ENSAPLG00020015209	39.7647	89.2607	1.16654	1.78256e-08	3.24785e-07	Tiparp	XP_027320299.2 protein mono-ADP-ribosyltransferase TIPARP [Anas platyrhynchos]
ENSAPLG00020003044	0.001	5.23333	12.3535	1.79266e-08	3.26224e-07	IGHM	AAK17935.1 membrane-bound immunoglobulin alpha heavy chain, partial [Anas platyrhynchos]
ENSAPLG00020015947	0.715333	5.825	3.02557	1.99471e-08	3.62547e-07	Kif17	XP_038022524.1 kinesin-like protein KIF17 isoform X7 [Anas platyrhynchos]
ENSAPLG00020002976	97.059	209.509	1.11008	2.07384e-08	3.76468e-07	HBP1	XP_027314931.1 HMG box-containing protein 1 isoform X1 [Anas platyrhynchos]
ENSAPLG00020013563	139.328	46.3707	-1.5872	2.09442e-08	3.79738e-07	SQLE	XP_027308496.1 squalene monooxygenase [Anas platyrhynchos]
ENSAPLG00020005230	78.4893	187.559	1.25678	2.11597e-08	3.83177e-07	Uba2	XP_027322753.1 SUMO-activating enzyme subunit 2 [Anas platyrhynchos]
MSTRG.11824	5.419	0.032	-7.40381	2.12724e-08	3.84748e-07	--	EOB05638.1 taxid=8839 hypothetical protein Anapl_02052 [Anas platyrhynchos]
ENSAPLG00020006265	102.863	34.9347	-1.55799	2.16512e-08	3.91121e-07	TNFRSF1A	XP_027305493.1 tumor necrosis factor receptor superfamily member 1A [Anas platyrhynchos]
ENSAPLG00020003290	60.5253	24.1877	-1.32327	2.25717e-08	4.07253e-07	NSDHL	XP_012947903.3 sterol-4-alpha-carboxylate 3-dehydrogenase, decarboxylating isoform X1 [Anas platyrhynchos]
ENSAPLG00020004813	38.983	110.733	1.50616	2.31777e-08	4.17677e-07	SLC4A2	XP_038029586.1 anion exchange protein 2 isoform X5 [Anas platyrhynchos]
MSTRG.14845	5.48633	20.111	1.87407	2.32125e-08	4.17797e-07	--	XP_038027528.1 taxid=8839 uncharacterized protein LOC101796470 isoform X1 [Anas platyrhynchos]
ENSAPLG00020011899	49.524	140.256	1.50186	2.3499e-08	4.22357e-07	MAPRE2	XP_027307917.2 microtubule-associated protein RP/EB family member 2 isoform X2 [Anas platyrhynchos]
ENSAPLG00020004398	67.9883	25.1603	-1.43414	2.35229e-08	4.22357e-07	PRKCB	XP_029857974.1 protein kinase C beta type isoform X1 [Aquila chrysaetos chrysaetos]
ENSAPLG00020002188	0.855	7.83933	3.19673	2.35667e-08	4.22521e-07	INPP4B	XP_032042443.1 inositol polyphosphate 4-phosphatase type II isoform X2 [Aythya fuligula]
ENSAPLG00020003867	1180.21	519.239	-1.18457	2.35891e-08	4.22521e-07	HLA-DRA	ADM53418.1 MHC class II antigen [Anas platyrhynchos]
ENSAPLG00020011062	2.692	12.4003	2.20363	2.36403e-08	4.22927e-07	TNK2	XP_032049310.1 activated CDC42 kinase 1 isoform X4 [Aythya fuligula]
ENSAPLG00020009531	20.8587	6.33833	-1.71847	2.38884e-08	4.26851e-07	CCDC125	XP_038025750.1 coiled-coil domain-containing protein 125 [Anas platyrhynchos]
ENSAPLG00020000140	5.65933	21.6223	1.93382	2.5093e-08	4.47835e-07	LACC1	EOB09124.1 UPF0124 protein C13orf31, partial [Anas platyrhynchos]
ENSAPLG00020008064	7.45	23.4647	1.65518	2.52206e-08	4.49571e-07	ITGA6	XP_027318069.1 integrin alpha-6 isoform X2 [Anas platyrhynchos]
ENSAPLG00020007916	119.846	27.5453	-2.1213	2.54802e-08	4.53652e-07	SH3GL2	XP_032061798.1 endophilin-A1 [Aythya fuligula]
ENSAPLG00020001777	12.6987	4.088	-1.63521	2.61135e-08	4.64369e-07	DAAM1	XP_038035685.1 disheveled-associated activator of morphogenesis 1 isoform X1 [Anas platyrhynchos]
ENSAPLG00020005321	31.7223	7.013	-2.1774	2.65988e-08	4.72432e-07	foxi1c	XP_027311563.1 forkhead box protein I3 [Anas platyrhynchos]
ENSAPLG00020000604	188.031	91.519	-1.03883	2.69699e-08	4.7845e-07	RFTN1	XP_027306814.2 LOW QUALITY PROTEIN: raftlin [Anas platyrhynchos]
ENSAPLG00020018214	1.39467	26.332	4.23882	2.74682e-08	4.86706e-07	hsp30c	XP_032058851.1 heat shock protein 30C-like [Aythya fuligula]
MSTRG.17729	5.161	16.497	1.67648	2.8077e-08	4.96899e-07	--	-
ENSAPLG00020014793	24.1857	69.7467	1.52797	2.85295e-08	5.04304e-07	CMTM6	XP_027306905.2 CKLF-like MARVEL transmembrane domain-containing protein 6 [Anas platyrhynchos]
ENSAPLG00020012134	444.639	210.446	-1.07918	2.8796e-08	5.08408e-07	TOMM5	XP_027302665.1 mitochondrial import receptor subunit TOM5 homolog [Anas platyrhynchos]
ENSAPLG00020001658	2.91267	0.0863333	-5.07628	3.11104e-08	5.48617e-07	Grik1	XP_035171474.1 glutamate receptor ionotropic, kainate 1 isoform X1 [Oxyura jamaicensis]
MSTRG.10783	0.001	3.038	11.5689	3.11489e-08	5.48643e-07	--	XP_040434802.1 taxid=148594 uncharacterized protein LOC121080746 [Falco naumanni]
ENSAPLG00020011896	5.94633	1.16533	-2.35126	3.19705e-08	5.62446e-07	ARAP3	XP_027324108.1 arf-GAP with Rho-GAP domain, ANK repeat and PH domain-containing protein 3 isoform X2 [Anas platyrhynchos]
ENSAPLG00020014258	30.0513	10.6613	-1.49504	3.21941e-08	5.65708e-07	NDST2	XP_027315593.1 bifunctional heparan sulfate N-deacetylase/N-sulfotransferase 2 [Anas platyrhynchos]
ENSAPLG00020017457	9.85467	2.83	-1.80001	3.26271e-08	5.72636e-07	CACHD1	XP_035420309.1 VWFA and cache domain-containing protein 1 [Cygnus atratus]
ENSAPLG00020016268	0.162333	4.77233	4.87766	3.29603e-08	5.77799e-07	Fblim1	XP_035423836.1 filamin-binding LIM protein 1 isoform X2 [Cygnus atratus]
ENSAPLG00020012301	1.94167	12.7087	2.71045	3.39043e-08	5.93646e-07	OR10K2	XP_038041838.1 guanylate-binding protein 1-like [Anas platyrhynchos]
ENSAPLG00020017475	6.37433	0.468333	-3.76667	3.41038e-08	5.96433e-07	SGIP1	XP_032048000.1 SH3-containing GRB2-like protein 3-interacting protein 1 isoform X4 [Aythya fuligula]
ENSAPLG00020001663	0.541333	7.49433	3.79121	3.51888e-08	6.1396e-07	TRIB2	XP_032860444.1 tribbles homolog 2 isoform X1 [Tyto alba alba]
ENSAPLG00020001851	0.0366667	3.57667	6.608	3.59379e-08	6.26291e-07	B4GALNT4	XP_027314165.1 N-acetyl-beta-glucosaminyl-glycoprotein 4-beta-N-acetylgalactosaminyltransferase 1 isoform X1 [Anas platyrhynchos]
ENSAPLG00020017191	21.897	62.8627	1.52147	3.76104e-08	6.53943e-07	Hectd3	XP_038039088.1 E3 ubiquitin-protein ligase HECTD3 isoform X2 [Anas platyrhynchos]
ENSAPLG00020015040	11.9713	34.8737	1.54255	3.76364e-08	6.53943e-07	APAF1	XP_027308212.2 apoptotic protease-activating factor 1 isoform X1 [Anas platyrhynchos]
ENSAPLG00020012101	6.217	34.4333	2.46952	3.76859e-08	6.53943e-07	MEIS1	XP_005042963.1 PREDICTED: homeobox protein Meis1 isoform X2 [Ficedula albicollis]
ENSAPLG00020004194	16.2253	49.8967	1.6207	3.77011e-08	6.53943e-07	Tmem140	XP_038040868.1 transmembrane protein 140 isoform X2 [Anas platyrhynchos]
ENSAPLG00020012938	192.5	71.76	-1.42361	3.78868e-08	6.55736e-07	FBXO30	XP_021129408.1 F-box only protein 30 isoform X1 [Anas platyrhynchos]
ENSAPLG00020002464	0.144667	5.58567	5.27093	3.78931e-08	6.55736e-07	Mcam	XP_027300210.2 LOW QUALITY PROTEIN: cell surface glycoprotein MUC18 [Anas platyrhynchos]
ENSAPLG00020018304	28.5123	9.598	-1.57078	3.79469e-08	6.55901e-07	NUP210	XP_038041907.1 nuclear pore membrane glycoprotein 210 [Anas platyrhynchos]
ENSAPLG00020005659	211.847	758.893	1.84087	4.01756e-08	6.93614e-07	Lrrc15	XP_027320585.2 leucine-rich repeat-containing protein 15 [Anas platyrhynchos]
ENSAPLG00020002200	2.55133	9.542	1.90304	4.07947e-08	7.03483e-07	Ppargc1b	XP_038042181.1 peroxisome proliferator-activated receptor gamma coactivator 1-beta isoform X1 [Anas platyrhynchos]
ENSAPLG00020003155	10.7187	2.898	-1.887	4.19979e-08	7.23389e-07	GPR162	XP_027305585.1 LOW QUALITY PROTEIN: probable G-protein coupled receptor 162 [Anas platyrhynchos]
ENSAPLG00020000680	0.467667	6.71633	3.84412	4.29456e-08	7.37997e-07	CSF2RA	XP_021130912.2 interleukin-5 receptor subunit alpha [Anas platyrhynchos]
ENSAPLG00020007734	127.244	53.4773	-1.25059	4.30899e-08	7.39099e-07	timm21	XP_027307703.1 mitochondrial import inner membrane translocase subunit Tim21 [Anas platyrhynchos]
ENSAPLG00020000041	251.033	69.7133	-1.84837	4.31095e-08	7.39099e-07	IL1R2	EOB05824.1 Interleukin-1 receptor type II, partial [Anas platyrhynchos]
ENSAPLG00020016240	113.154	309.664	1.45242	4.37735e-08	7.4875e-07	NUGGC	XP_027311284.2 nuclear GTPase SLIP-GC-like isoform X1 [Anas platyrhynchos]
ENSAPLG00020014797	17.1147	60.1217	1.81265	4.54815e-08	7.77068e-07	CMTM7	XP_027306904.2 CKLF-like MARVEL transmembrane domain-containing protein 7 [Anas platyrhynchos]
ENSAPLG00020001085	81.0623	237.988	1.55379	4.56592e-08	7.78705e-07	DTX3L	XP_027318027.2 E3 ubiquitin-protein ligase DTX3L [Anas platyrhynchos]
ENSAPLG00020017492	3.812	12.6917	1.73526	4.56825e-08	7.78705e-07	MOB3C	EOA95820.1 Mps one binder kinase activator-like 2C, partial [Anas platyrhynchos]
ENSAPLG00020009010	52.415	20.1793	-1.3771	4.70772e-08	8.01557e-07	TMEM231	XP_027321966.2 transmembrane protein 231 isoform X1 [Anas platyrhynchos]
ENSAPLG00020014839	4.60467	18.5383	2.00934	4.84261e-08	8.23578e-07	CGAS	XP_027310983.2 cyclic GMP-AMP synthase [Anas platyrhynchos]
ENSAPLG00020017295	1.79167	15.57	3.11939	4.8695e-08	8.27201e-07	Tcf7	XP_038042170.1 transcription factor 7 isoform X1 [Anas platyrhynchos]
ENSAPLG00020011761	19.5403	50.5043	1.36995	4.96539e-08	8.42524e-07	pol	XP_014810274.1 PREDICTED: uncharacterized protein LOC106895380 [Calidris pugnax]
ENSAPLG00020007377	0.638333	4.51967	2.82383	4.9854e-08	8.44952e-07	ACAP3	XP_040389299.1 arf-GAP with coiled-coil, ANK repeat and PH domain-containing protein 3 isoform X6 [Cygnus olor]
ENSAPLG00020014525	0.279667	5.15167	4.20326	5.04387e-08	8.53884e-07	SMAD2	XP_038025520.1 mothers against decapentaplegic homolog 2 isoform X1 [Anas platyrhynchos]
ENSAPLG00020011169	1.076	7.09433	2.72099	5.04969e-08	8.53893e-07	GFI1	XP_038039159.1 zinc finger protein Gfi-1 isoform X1 [Anas platyrhynchos]
ENSAPLG00020016758	0.027	10.4643	8.59831	5.0577e-08	8.54272e-07	KCNMB2	XP_021131449.2 calcium-activated potassium channel subunit beta-2 isoform X1 [Anas platyrhynchos]
ENSAPLG00020007378	51.2207	114.65	1.16243	5.09611e-08	8.59779e-07	TRIM25	XP_012948210.3 E3 ubiquitin/ISG15 ligase TRIM25 isoform X3 [Anas platyrhynchos]
ENSAPLG00020010726	0.482667	6.511	3.75378	5.15423e-08	8.68596e-07	Tox2	XP_038022196.1 TOX high mobility group box family member 2 isoform X1 [Anas platyrhynchos]
MSTRG.12520	0.111	3.336	4.90949	5.1881e-08	8.7331e-07	ANKRD24	XP_038024976.1 taxid=8839 ankyrin repeat domain-containing protein 24 isoform X5 [Anas platyrhynchos]
ENSAPLG00020016756	59.987	27.785	-1.11034	5.31695e-08	8.93984e-07	ANKRD13A	XP_038043483.1 LOW QUALITY PROTEIN: ankyrin repeat domain-containing protein 13A [Anas platyrhynchos]
ENSAPLG00020014499	0.150333	5.122	5.09047	5.34509e-08	8.97697e-07	C18orf25	XP_038025391.1 uncharacterized protein C18orf25-like isoform X1 [Anas platyrhynchos]
ENSAPLG00020014727	79.7273	264.469	1.72995	5.5923e-08	9.38151e-07	--	EOA94307.1 Intercellular adhesion molecule 1 [Anas platyrhynchos]
ENSAPLG00020004748	10.3523	36.0437	1.79979	5.65709e-08	9.47946e-07	nbeal2	XP_038030044.1 LOW QUALITY PROTEIN: neurobeachin-like protein 2 [Anas platyrhynchos]
ENSAPLG00020018431	77.084	27.3927	-1.49264	5.76102e-08	9.64271e-07	Lss	XP_027317126.2 LOW QUALITY PROTEIN: lanosterol synthase [Anas platyrhynchos]
ENSAPLG00020012529	67.2517	27.8183	-1.27353	5.80558e-08	9.70633e-07	cfaD	XP_027299823.2 LOW QUALITY PROTEIN: digestive cysteine proteinase 1 [Anas platyrhynchos]
ENSAPLG00020010899	12.091	38.375	1.66623	5.85956e-08	9.78554e-07	TTMP	XP_035396382.1 TPA-induced transmembrane protein [Cygnus atratus]
ENSAPLG00020006640	3.25033	0.117667	-4.78781	5.87067e-08	9.79305e-07	COLGALT2	XP_027319355.1 procollagen galactosyltransferase 2 isoform X1 [Anas platyrhynchos]
ENSAPLG00020013550	73.8637	22.2827	-1.72894	6.05322e-08	1.00862e-06	Bloc1s2	XP_031457938.1 biogenesis of lysosome-related organelles complex 1 subunit 2 isoform X1 [Phasianus colchicus]
ENSAPLG00020001042	30.1303	11.9407	-1.33533	6.2026e-08	1.03235e-06	IVD	XP_038036019.1 isovaleryl-CoA dehydrogenase, mitochondrial [Anas platyrhynchos]
ENSAPLG00020009908	1.68467	13.522	3.00477	6.24795e-08	1.03873e-06	VEGFC	XP_032042682.1 LOW QUALITY PROTEIN: vascular endothelial growth factor C, partial [Aythya fuligula]
ENSAPLG00020017286	5.475	26.367	2.2678	6.32285e-08	1.05e-06	P2RY10	XP_032052384.1 putative P2Y purinoceptor 10 [Aythya fuligula]
ENSAPLG00020014537	0.001	2.34033	11.1925	6.34865e-08	1.05279e-06	ZBTB5	XP_038025456.1 zinc finger and BTB domain-containing protein 5-like isoform X1 [Anas platyrhynchos]
ENSAPLG00020002644	2.612	108.522	5.37668	6.35383e-08	1.05279e-06	MMP1	XP_005010575.1 interstitial collagenase [Anas platyrhynchos]
ENSAPLG00020006476	10.883	40.2473	1.88682	6.37066e-08	1.0544e-06	Rpain	XP_027301682.1 RPA-interacting protein [Anas platyrhynchos]
ENSAPLG00020006902	56.8557	138.319	1.28262	6.48916e-08	1.07281e-06	--	XP_038039355.1 uncharacterized protein LOC119717691 [Anas platyrhynchos]
ENSAPLG00020009851	0.0566667	4.134	6.18889	6.53358e-08	1.07895e-06	CDH11	EOB01024.1 Cadherin-11, partial [Anas platyrhynchos]
ENSAPLG00020001545	2.09033	11.407	2.44811	6.59657e-08	1.08814e-06	ITGB8	XP_027306712.2 integrin beta-8 isoform X1 [Anas platyrhynchos]
ENSAPLG00020014250	54.0947	15.1103	-1.83995	6.76969e-08	1.11546e-06	ATP10D	XP_005028161.3 probable phospholipid-transporting ATPase VD isoform X1 [Anas platyrhynchos]
ENSAPLG00020010025	117.008	255.768	1.12823	6.81432e-08	1.12156e-06	TRAFD1	XP_038043234.1 TRAF-type zinc finger domain-containing protein 1 [Anas platyrhynchos]
ENSAPLG00020016012	2.764	9.92333	1.84407	6.99737e-08	1.15041e-06	pol	XP_014810274.1 PREDICTED: uncharacterized protein LOC106895380 [Calidris pugnax]
ENSAPLG00020017273	80.918	178.436	1.14087	7.01854e-08	1.15261e-06	PTPRE	XP_027316064.1 receptor-type tyrosine-protein phosphatase epsilon isoform X4 [Anas platyrhynchos]
MSTRG.7954	1.74933	8.11233	2.21331	7.12709e-08	1.16914e-06	--	-
ENSAPLG00020013772	1.518	16.1097	3.40768	7.19131e-08	1.17837e-06	NOG	XP_005012312.1 noggin [Anas platyrhynchos]
ENSAPLG00020012963	0.230667	3.58467	3.95796	7.31514e-08	1.19734e-06	DSE	XP_038032553.1 dermatan-sulfate epimerase isoform X1 [Anas platyrhynchos]
ENSAPLG00020007411	0.0553333	8.51733	7.26611	7.39008e-08	1.20827e-06	SULT2B1	XP_027322221.2 LOW QUALITY PROTEIN: sulfotransferase 2B1-like [Anas platyrhynchos]
ENSAPLG00020011784	58.2387	29.1063	-1.00064	7.39863e-08	1.20833e-06	DHX37	XP_027325695.1 probable ATP-dependent RNA helicase DHX37 [Anas platyrhynchos]
ENSAPLG00020006574	57.9037	26.7047	-1.11656	7.49318e-08	1.22154e-06	Edem3	XP_027319450.1 ER degradation-enhancing alpha-mannosidase-like protein 3 isoform X1 [Anas platyrhynchos]
ENSAPLG00020010509	47.6667	22.0253	-1.11382	7.49596e-08	1.22154e-06	Abtb1	XP_027323315.1 ankyrin repeat and BTB/POZ domain-containing protein 1 [Anas platyrhynchos]
ENSAPLG00020009648	181.326	388.831	1.10055	7.61904e-08	1.24023e-06	PFKP	XP_027306276.1 ATP-dependent 6-phosphofructokinase, platelet type isoform X3 [Anas platyrhynchos]
ENSAPLG00020001482	10.3997	69.378	2.73794	7.64168e-08	1.24182e-06	PHLDA2	XP_009287156.1 PREDICTED: pleckstrin homology-like domain family A member 2 [Aptenodytes forsteri]
ENSAPLG00020005797	7.531	0.151	-5.64022	7.64559e-08	1.24182e-06	FGD2	XP_038024389.1 FYVE, RhoGEF and PH domain-containing protein 2 isoform X3 [Anas platyrhynchos]
ENSAPLG00020007404	3.319	12.5557	1.91952	7.69558e-08	1.24857e-06	Gimap1	XP_038030407.1 GTPase IMAP family member 1-like isoform X1 [Anas platyrhynchos]
ENSAPLG00020010516	542.594	260.108	-1.06076	7.77774e-08	1.26052e-06	SERINC3	XP_038022124.1 serine incorporator 3 [Anas platyrhynchos]
ENSAPLG00020017544	0.569333	5.228	3.19891	7.94812e-08	1.28673e-06	Lef1	XP_027312419.1 lymphoid enhancer-binding factor 1 isoform X1 [Anas platyrhynchos]
MSTRG.20465	117.187	34.104	-1.7808	7.9655e-08	1.28813e-06	gag-pro-pol	XP_032062684.1 taxid=219594 uncharacterized protein LOC116501274 [Aythya fuligula]
ENSAPLG00020004050	8.28867	1.04267	-2.99086	8.00118e-08	1.29249e-06	QRFPR	XP_027312681.2 pyroglutamylated RF-amide peptide receptor isoform X1 [Anas platyrhynchos]
MSTRG.14326	3.075	15.4717	2.33097	8.02005e-08	1.29413e-06	--	-
ENSAPLG00020007409	2613.45	880.684	-1.56926	8.06627e-08	1.30017e-06	SCPEP1	XP_027327417.2 retinoid-inducible serine carboxypeptidase isoform X1 [Anas platyrhynchos]
ENSAPLG00020010868	0.0546667	5.184	6.56726	8.09223e-08	1.30294e-06	FGFR1	XP_040394162.1 fibroblast growth factor receptor 1 isoform X1 [Cygnus olor]
ENSAPLG00020003353	57.152	20.218	-1.49916	8.3713e-08	1.34641e-06	TMEM192	XP_027312262.1 transmembrane protein 192 isoform X1 [Anas platyrhynchos]
ENSAPLG00020000209	215.363	103.345	-1.05929	8.54107e-08	1.37222e-06	KAT2B	XP_038031533.1 LOW QUALITY PROTEIN: histone acetyltransferase KAT2B [Anas platyrhynchos]
MSTRG.1976	28.9997	7.17667	-2.01465	8.63864e-08	1.38639e-06	DOP1B	XP_027304929.2 taxid=8839 protein dopey-2 isoform X1 [Anas platyrhynchos]
ENSAPLG00020015389	78.5927	38.0587	-1.04617	8.71666e-08	1.3974e-06	ME2	XP_038026049.1 NAD-dependent malic enzyme, mitochondrial [Anas platyrhynchos]
MSTRG.14636	2.68867	13.825	2.36232	9.01575e-08	1.44379e-06	--	KAI6060477.1 taxid=8832 Zinc finger protein RFP [Aix galericulata]
MSTRG.15351	0.001	5.996	12.5498	9.58888e-08	1.53391e-06	--	XP_040398540.1 taxid=8869 uncharacterized protein LOC121062564 [Cygnus olor]
ENSAPLG00020011677	0.110667	3.96867	5.16436	9.70971e-08	1.55156e-06	ADAM19	XP_038042225.1 disintegrin and metalloproteinase domain-containing protein 19 [Anas platyrhynchos]
ENSAPLG00020013863	12.612	45.4167	1.84842	9.85915e-08	1.57374e-06	Stk17b	XP_027317616.1 LOW QUALITY PROTEIN: serine/threonine-protein kinase 17B [Anas platyrhynchos]
ENSAPLG00020017769	9.71167	21.153	1.12307	1.00012e-07	1.59467e-06	LYST	XP_005023903.1 lysosomal-trafficking regulator [Anas platyrhynchos]
ENSAPLG00020015090	15.179	38.433	1.34027	1.00117e-07	1.59467e-06	SKI	XP_005011105.1 ski oncogene [Anas platyrhynchos]
ENSAPLG00020008692	0.757333	6.15267	3.02221	1.00489e-07	1.59887e-06	smpd5	XP_040403463.1 sphingomyelin phosphodiesterase 5-like isoform X1 [Cygnus olor]
ENSAPLG00020008176	37.755	11.4153	-1.72569	1.01466e-07	1.61267e-06	GNG10	XP_027302024.1 guanine nucleotide-binding protein G(I)/G(S)/G(O) subunit gamma-10 [Anas platyrhynchos]
ENSAPLG00020001988	32.1053	14.2673	-1.1701	1.01713e-07	1.61487e-06	CRYZ	XP_032048611.1 quinone oxidoreductase [Aythya fuligula]
ENSAPLG00020010186	0.336667	7.20433	4.41947	1.02254e-07	1.62172e-06	POU2F3	XP_028941320.1 POU domain, class 2, transcription factor 3 [Antrostomus carolinensis]
MSTRG.21761	38.6993	8.286	-2.22356	1.02746e-07	1.62779e-06	NREP	XP_009872460.1 taxid=57397 PREDICTED: uncharacterized protein LOC104277510, partial [Apaloderma vittatum]
ENSAPLG00020006943	2.17833	8.79167	2.01291	1.05979e-07	1.67721e-06	--	XP_042653728.1 E3 ubiquitin-protein ligase AMFR isoform X1 [Tyto alba]
ENSAPLG00020003595	26.425	6.86933	-1.94366	1.06667e-07	1.6863e-06	HLA-DMB	XP_038043864.1 HLA class II histocompatibility antigen, DM beta chain-like isoform X1 [Anas platyrhynchos]
ENSAPLG00020017069	6.50567	32.4257	2.31737	1.07194e-07	1.69282e-06	ASPA	XP_005023153.1 aspartoacylase [Anas platyrhynchos]
ENSAPLG00020016317	9.26567	28.575	1.62479	1.08834e-07	1.71689e-06	ST7	XP_038035860.1 suppressor of tumorigenicity 7 protein isoform X2 [Anas platyrhynchos]
ENSAPLG00020004157	956.53	451.204	-1.08403	1.10002e-07	1.73346e-06	ARHGDIB	EOA97712.1 Rho GDP-dissociation inhibitor 2, partial [Anas platyrhynchos]
ENSAPLG00020004093	0.0263333	3.61233	7.0999	1.11441e-07	1.75428e-06	AK8	XP_027326412.2 LOW QUALITY PROTEIN: adenylate kinase 8 [Anas platyrhynchos]
MSTRG.12860	5.88967	0.391667	-3.91049	1.13592e-07	1.78624e-06	Neil2	XP_027311188.1 taxid=8839 endonuclease 8-like 2 [Anas platyrhynchos]
ENSAPLG00020003340	76.999	36.8743	-1.06222	1.15107e-07	1.80815e-06	MVB12B	XP_038043986.1 multivesicular body subunit 12B isoform X2 [Anas platyrhynchos]
ENSAPLG00020002415	7.95133	27.3913	1.78445	1.15328e-07	1.80833e-06	ASAP3	XP_038023275.1 LOW QUALITY PROTEIN: arf-GAP with SH3 domain, ANK repeat and PH domain-containing protein 3 [Anas platyrhynchos]
MSTRG.18635	0.001	1.62833	10.6692	1.15363e-07	1.80833e-06	--	EOB05108.1 taxid=8839 hypothetical protein Anapl_03531 [Anas platyrhynchos]
ENSAPLG00020017025	96.628	37.514	-1.36501	1.18812e-07	1.86043e-06	Glod4	XP_005011926.2 glyoxalase domain-containing protein 4 [Anas platyrhynchos]
ENSAPLG00020005366	31.903	10.0997	-1.65938	1.1988e-07	1.87516e-06	MVD	XP_032051476.1 diphosphomevalonate decarboxylase [Aythya fuligula]
ENSAPLG00020005990	0.351667	9.133	4.69881	1.22315e-07	1.90991e-06	BCL2L14	XP_005010090.3 apoptosis facilitator Bcl-2-like protein 14 [Anas platyrhynchos]
ENSAPLG00020013779	2	13.2963	2.73296	1.22359e-07	1.90991e-06	GPR35	XP_005028657.2 G-protein coupled receptor 35 [Anas platyrhynchos]
ENSAPLG00020017443	10.375	47.3057	2.1889	1.22863e-07	1.91575e-06	SAMD4A	XP_027315081.1 protein Smaug homolog 1 isoform X2 [Anas platyrhynchos]
ENSAPLG00020000439	0.0813333	3.83367	5.55873	1.24258e-07	1.93548e-06	DGKI	XP_027300983.2 diacylglycerol kinase iota isoform X6 [Anas platyrhynchos]
ENSAPLG00020010372	44.411	21.0087	-1.07993	1.26238e-07	1.96425e-06	CBL	XP_027300206.2 E3 ubiquitin-protein ligase CBL [Anas platyrhynchos]
MSTRG.3465	2.99767	13.9653	2.21994	1.28399e-07	1.99578e-06	--	XP_005031070.2 taxid=8839 high mobility group protein HMGI-C-like isoform X2 [Anas platyrhynchos]
ENSAPLG00020016781	47.915	20.1573	-1.24917	1.31153e-07	2.03448e-06	GRK3	XP_010580351.1 PREDICTED: beta-adrenergic receptor kinase 2 [Haliaeetus leucocephalus]
ENSAPLG00020012569	4.53033	19.0827	2.07457	1.31164e-07	2.03448e-06	EBI3	XP_038024986.1 interleukin-27 subunit beta [Anas platyrhynchos]
ENSAPLG00020017059	27.6437	9.50267	-1.54054	1.31897e-07	2.04371e-06	ST3GAL3	XP_027318213.1 CMP-N-acetylneuraminate-beta-1,4-galactoside alpha-2,3-sialyltransferase isoform X1 [Anas platyrhynchos]
ENSAPLG00020015757	11.212	45.764	2.02917	1.32114e-07	2.04494e-06	SCAPER	XP_027321393.2 S phase cyclin A-associated protein in the endoplasmic reticulum isoform X2 [Anas platyrhynchos]
ENSAPLG00020012284	3.916	0.565667	-2.79136	1.3258e-07	2.04787e-06	Scel	XP_038038253.1 sciellin [Anas platyrhynchos]
MSTRG.8780	26.347	54.7953	1.05641	1.37192e-07	2.11587e-06	ZCCHC2	XP_038029906.1 taxid=8839 zinc finger CCHC domain-containing protein 2 isoform X1 [Anas platyrhynchos]
ENSAPLG00020004019	413.248	142.795	-1.53306	1.37268e-07	2.11587e-06	SLC17A5	EOB08512.1 Sialin, partial [Anas platyrhynchos]
ENSAPLG00020009201	15.9107	49.4217	1.63515	1.38597e-07	2.13414e-06	--	XP_038023791.1 extracellular matrix protein 1 [Anas platyrhynchos]
ENSAPLG00020006992	2.02	11.2093	2.47227	1.40581e-07	2.16064e-06	TSPAN18	XP_032043915.1 tetraspanin-18 [Aythya fuligula]
ENSAPLG00020014736	0.001	2.256	11.1396	1.4061e-07	2.16064e-06	HMCN2	XP_032062987.1 intercellular adhesion molecule 5 [Aythya fuligula]
MSTRG.16837	19.488	6.13233	-1.66808	1.41853e-07	2.17748e-06	--	EOB00462.1 taxid=8839 hypothetical protein Anapl_00778 [Anas platyrhynchos]
MSTRG.402	809.208	374.372	-1.11204	1.43835e-07	2.20554e-06	Smim30	XP_027313249.1 taxid=8839 small integral membrane protein 30 [Anas platyrhynchos]
ENSAPLG00020002718	0.488667	4.73233	3.27563	1.43979e-07	2.20554e-06	CDHR3	XP_021131021.3 LOW QUALITY PROTEIN: cadherin-related family member 3 [Anas platyrhynchos]
ENSAPLG00020012124	0.979	7.017	2.84147	1.44673e-07	2.21388e-06	Cnrip1	XP_005025222.2 CB1 cannabinoid receptor-interacting protein 1 [Anas platyrhynchos]
ENSAPLG00020004320	70.4037	33.1813	-1.08528	1.44906e-07	2.21516e-06	PTDSS1	XP_021132939.2 phosphatidylserine synthase 1 isoform X1 [Anas platyrhynchos]
ENSAPLG00020004270	66.1717	28.046	-1.23842	1.46586e-07	2.23854e-06	Slc25a16	XP_005009181.3 graves disease carrier protein isoform X1 [Anas platyrhynchos]
ENSAPLG00020007473	5.14867	16.965	1.72029	1.49329e-07	2.27808e-06	TMEM38A	XP_005029150.2 trimeric intracellular cation channel type A isoform X1 [Anas platyrhynchos]
ENSAPLG00020005340	17.3107	41.4647	1.26022	1.53524e-07	2.33965e-06	STYXL1	XP_027328502.2 serine/threonine/tyrosine-interacting-like protein 1 [Anas platyrhynchos]
ENSAPLG00020017782	11.205	30.9263	1.46469	1.56934e-07	2.38917e-06	GGPS1	XP_032039962.1 geranylgeranyl pyrophosphate synthase isoform X1 [Aythya fuligula]
ENSAPLG00020011684	50.7227	16.9097	-1.58478	1.59568e-07	2.42677e-06	IFT43	XP_027314295.1 intraflagellar transport protein 43 homolog isoform X2 [Anas platyrhynchos]
ENSAPLG00020011901	0.279	4.41233	3.9832	1.61338e-07	2.45117e-06	GIMAP2	XP_038030387.1 GTPase IMAP family member 8-like isoform X3 [Anas platyrhynchos]
ENSAPLG00020017577	33.124	123.029	1.89305	1.62751e-07	2.47011e-06	SLC9B2	EOB02698.1 Mitochondrial sodium/hydrogen exchanger NHA2, partial [Anas platyrhynchos]
ENSAPLG00020017435	35.642	6.12	-2.54197	1.63662e-07	2.48139e-06	NPL	XP_032048248.1 N-acetylneuraminate lyase isoform X1 [Aythya fuligula]
MSTRG.3417	250.818	66.0297	-1.92545	1.64017e-07	2.48424e-06	STAB1	EOA97235.1 taxid=8839 Stabilin-1, partial [Anas platyrhynchos]
ENSAPLG00020000940	0.653667	6.89167	3.39823	1.66022e-07	2.51203e-06	GADD45A	XP_032048348.1 growth arrest and DNA damage-inducible protein GADD45 alpha [Aythya fuligula]
ENSAPLG00020011402	97.9273	209.021	1.09386	1.66917e-07	2.51624e-06	IL2RG	NP_001297317.1 cytokine receptor common subunit gamma precursor [Anas platyrhynchos]
ENSAPLG00020017414	0.615333	7.575	3.62181	1.66955e-07	2.51624e-06	TNN	XP_038039181.1 tenascin-N [Anas platyrhynchos]
MSTRG.14631	0.001	4.545	12.1501	1.66979e-07	2.51624e-06	BTN1A1	XP_038043773.1 taxid=8839 tripartite motif-containing protein 15 isoform X9 [Anas platyrhynchos]
ENSAPLG00020012709	160.987	70.0343	-1.20081	1.70101e-07	2.56068e-06	CLN8	XP_027310923.1 protein CLN8 [Anas platyrhynchos]
ENSAPLG00020003959	22.7027	64.2553	1.50095	1.76118e-07	2.64857e-06	RALGDS	XP_027326391.2 ral guanine nucleotide dissociation stimulator isoform X1 [Anas platyrhynchos]
ENSAPLG00020006841	0.710333	5.03733	2.82609	1.76344e-07	2.64872e-06	JAKMIP2	XP_005019504.1 janus kinase and microtubule-interacting protein 1 isoform X1 [Anas platyrhynchos]
ENSAPLG00020001952	429.326	171.071	-1.32748	1.76563e-07	2.64872e-06	Slc26a5	XP_027315248.1 prestin [Anas platyrhynchos]
ENSAPLG00020012819	9.57967	0.846333	-3.50068	1.76665e-07	2.64872e-06	CD5L	XP_038035159.1 CD5 antigen-like [Anas platyrhynchos]
MSTRG.16538	0.751333	6.913	3.20179	1.81236e-07	2.71451e-06	--	XP_047912747.1 taxid=8845 uncharacterized protein LOC106029684 isoform X2 [Anser cygnoides]
ENSAPLG00020011954	4.822	0.765667	-2.65484	1.83087e-07	2.73947e-06	KIF5C	XP_035186814.1 kinesin heavy chain [Oxyura jamaicensis]
ENSAPLG00020017746	645.767	1932.42	1.58133	1.86674e-07	2.79031e-06	Sqstm1	XP_027324306.2 LOW QUALITY PROTEIN: sequestosome-1 [Anas platyrhynchos]
MSTRG.20466	168.489	50.8747	-1.72764	1.91373e-07	2.85767e-06	env	XP_038041111.1 taxid=8839 uncharacterized protein LOC119718063 [Anas platyrhynchos]
ENSAPLG00020018078	0.370333	78.928	7.73557	1.91836e-07	2.8617e-06	--	XP_038024590.1 granulocyte colony-stimulating factor isoform X3 [Anas platyrhynchos]
MSTRG.7572	0.701667	18.3847	4.71157	1.92212e-07	2.86442e-06	--	-
ENSAPLG00020015305	16.5087	76.598	2.21408	1.9292e-07	2.87208e-06	CD3E	XP_038023383.1 T-cell surface glycoprotein CD3 epsilon chain isoform X1 [Anas platyrhynchos]
ENSAPLG00020016584	0.167	5.741	5.10338	1.9656e-07	2.92333e-06	Pld4	XP_012959860.2 5'-3' exonuclease PLD4 isoform X1 [Anas platyrhynchos]
ENSAPLG00020008147	143.968	64.5077	-1.15821	2.02508e-07	3.00878e-06	Mfsd14a	XP_027328334.1 hippocampus abundant transcript 1 protein [Anas platyrhynchos]
ENSAPLG00020007150	2.08767	14.0693	2.75259	2.04045e-07	3.02858e-06	RHOF	XP_035196477.1 rho-related GTP-binding protein RhoF isoform X2 [Oxyura jamaicensis]
MSTRG.1880	2.12633	20.3887	3.26133	2.05169e-07	3.0422e-06	--	-
ENSAPLG00020012927	613.375	302.793	-1.01844	2.14552e-07	3.17816e-06	GPRC5B	XP_027324615.2 G-protein coupled receptor family C group 5 member B [Anas platyrhynchos]
ENSAPLG00020007781	4.95633	0.319	-3.95764	2.15443e-07	3.18817e-06	TECTB	POI24463.1 hypothetical protein CIB84_011787, partial [Bambusicola thoracicus]
ENSAPLG00020005862	0.203667	2.65133	3.70244	2.20302e-07	3.25682e-06	zdhhc1	XP_035192851.1 palmitoyltransferase ZDHHC1 isoform X3 [Oxyura jamaicensis]
ENSAPLG00020009919	6.672	1.07967	-2.62753	2.20714e-07	3.25964e-06	Snap91	EOA97554.1 Clathrin coat assembly protein AP180, partial [Anas platyrhynchos]
ENSAPLG00020006990	286.06	99.5423	-1.52294	2.21014e-07	3.25964e-06	MAN2B2	EOA93248.1 Epididymis-specific alpha-mannosidase, partial [Anas platyrhynchos]
MSTRG.1818	12.9943	2.86433	-2.18161	2.21153e-07	3.25964e-06	--	KAK4817902.1 taxid=33587 LOW QUALITY PROTEIN: hypothetical protein QYF61_002385 [Mycteria americana]
ENSAPLG00020000677	36.1073	87.5313	1.27751	2.30274e-07	3.39071e-06	ANKRD28	EOB01135.1 Ankyrin repeat domain-containing protein 28, partial [Anas platyrhynchos]
MSTRG.14139	2.67067	0.31	-3.10686	2.34459e-07	3.44889e-06	--	PKK24803.1 taxid=8932 hypothetical protein A306_00009799, partial [Columba livia]
ENSAPLG00020017000	0.296333	5.55433	4.22832	2.34807e-07	3.45059e-06	MSLNL	XP_038043092.1 mesothelin-like protein [Anas platyrhynchos]
ENSAPLG00020002034	51.151	23.9327	-1.09578	2.44933e-07	3.59583e-06	GAB1	XP_038033897.1 GRB2-associated-binding protein 1 isoform X1 [Anas platyrhynchos]
ENSAPLG00020007702	186.118	74.7153	-1.31674	2.59428e-07	3.80109e-06	FDPS	XP_038023706.1 farnesyl pyrophosphate synthase [Anas platyrhynchos]
ENSAPLG00020017583	21.6427	7.73167	-1.48503	2.60604e-07	3.81455e-06	PCBD2	XP_009585215.1 PREDICTED: pterin-4-alpha-carbinolamine dehydratase 2, partial [Fulmarus glacialis]
ENSAPLG00020018286	0.0203333	2.832	7.12183	2.61957e-07	3.83058e-06	COL6A1	XP_005024802.2 collagen alpha-1(VI) chain [Anas platyrhynchos]
ENSAPLG00020013603	9.816	28.3693	1.53113	2.64825e-07	3.86869e-06	NR3C1	EOA99177.1 Glucocorticoid receptor, partial [Anas platyrhynchos]
ENSAPLG00020008265	2772.46	1296.06	-1.09704	2.67776e-07	3.90795e-06	CTSA	XP_027328576.2 lysosomal protective protein [Anas platyrhynchos]
ENSAPLG00020014844	0.192667	3.545	4.20161	2.72974e-07	3.97597e-06	NOS1AP	XP_035393978.1 carboxyl-terminal PDZ ligand of neuronal nitric oxide synthase protein isoform X2 [Cygnus atratus]
ENSAPLG00020001762	0.049	7.009	7.16028	2.76056e-07	4.01691e-06	EVA1C	XP_027304997.2 protein eva-1 homolog C isoform X1 [Anas platyrhynchos]
ENSAPLG00020013000	6.161	25.0707	2.02476	2.76462e-07	4.01888e-06	SLC35G1	XP_027316246.1 solute carrier family 35 member G1 [Anas platyrhynchos]
ENSAPLG00020006958	0.295667	5.22067	4.14219	2.80499e-07	4.07356e-06	VNN1	XP_038033216.1 pantetheinase isoform X2 [Anas platyrhynchos]
ENSAPLG00020018185	7.78033	36.858	2.24407	2.82363e-07	4.09662e-06	LPAR6	XP_038022554.1 lysophosphatidic acid receptor 6 [Anas platyrhynchos]
MSTRG.1831	4.83167	0.928333	-2.37981	2.83444e-07	4.10828e-06	--	XP_038031956.1 taxid=8839 inositol 1,4,5-trisphosphate receptor-interacting protein-like 1 [Anas platyrhynchos]
ENSAPLG00020016479	14.3847	4.221	-1.76888	2.86641e-07	4.15054e-06	Plpp3	XP_021128947.2 phospholipid phosphatase 3 [Anas platyrhynchos]
ENSAPLG00020009852	71.989	149.436	1.05368	2.87015e-07	4.1519e-06	Adar	XP_027300250.2 double-stranded RNA-specific adenosine deaminase isoform X2 [Anas platyrhynchos]
ENSAPLG00020014401	0.001	1.079	10.0755	2.93853e-07	4.24668e-06	C5	XP_027326463.2 complement C5 [Anas platyrhynchos]
ENSAPLG00020001141	0.001	3.061	11.5798	2.99152e-07	4.31414e-06	TMEM26	XP_005015644.2 transmembrane protein 26 [Anas platyrhynchos]
ENSAPLG00020008353	337.506	700.647	1.05377	2.99369e-07	4.31414e-06	RAC2	KFO10228.1 Ras-related C3 botulinum toxin substrate 2, partial [Balearica regulorum gibbericeps]
ENSAPLG00020007794	1.67967	10.428	2.63422	2.99395e-07	4.31414e-06	TOR1A	EOB05914.1 Torsin-1B, partial [Anas platyrhynchos]
ENSAPLG00020001873	11.2417	43.88	1.96471	3.02518e-07	4.35491e-06	DONSON	EOB05537.1 Protein downstream neighbor of son-like protein, partial [Anas platyrhynchos]
ENSAPLG00020014617	54.4123	26.7987	-1.02177	3.04218e-07	4.37513e-06	Ppp1r9b	XP_040392605.1 LOW QUALITY PROTEIN: neurabin-2 [Cygnus olor]
ENSAPLG00020015092	14.0677	36.3733	1.3705	3.04954e-07	4.37743e-06	CDK17	KAF1499957.1 Cyclin-dependent kinase 17, partial [Megadyptes antipodes antipodes]
ENSAPLG00020016950	0.054	8.42	7.28472	3.04969e-07	4.37743e-06	IL10	XP_035203034.1 interleukin-10 isoform X1 [Oxyura jamaicensis]
ENSAPLG00020007625	0.001	48.6073	15.5689	3.12606e-07	4.4827e-06	--	NP_001297723.1 C-C motif chemokine 19 precursor [Anas platyrhynchos]
ENSAPLG00020013528	12.028	5.00333	-1.26544	3.16668e-07	4.53657e-06	MARCHF8	XP_027315888.1 E3 ubiquitin-protein ligase MARCHF8 isoform X4 [Anas platyrhynchos]
ENSAPLG00020001562	153.981	69.3737	-1.1503	3.32605e-07	4.76027e-06	HGF	XP_038021671.1 LOW QUALITY PROTEIN: hepatocyte growth factor [Anas platyrhynchos]
ENSAPLG00020016889	52.6473	25.3747	-1.05297	3.38062e-07	4.8337e-06	ATP11B	XP_027320465.2 probable phospholipid-transporting ATPase IF isoform X2 [Anas platyrhynchos]
ENSAPLG00020014666	463.956	220.922	-1.07045	3.39944e-07	4.85591e-06	Glud1	XP_027315810.1 glutamate dehydrogenase 1, mitochondrial [Anas platyrhynchos]
ENSAPLG00020009429	36.236	81.0933	1.16216	3.58624e-07	5.11782e-06	JAK2	XP_027302951.2 tyrosine-protein kinase JAK2 [Anas platyrhynchos]
ENSAPLG00020010048	0.310667	3.049	3.2949	3.64321e-07	5.19411e-06	SAMD11	XP_027299161.2 sterile alpha motif domain-containing protein 11 isoform X1 [Anas platyrhynchos]
ENSAPLG00020007923	2.30633	16.236	2.81552	3.66617e-07	5.22182e-06	ITK	XP_032052846.1 tyrosine-protein kinase ITK/TSK isoform X1 [Aythya fuligula]
ENSAPLG00020000370	0.365333	5.332	3.86739	3.70694e-07	5.27483e-06	SERPINB12	XP_013056565.1 PREDICTED: LOW QUALITY PROTEIN: serpin B11-like, partial [Anser cygnoides domesticus]
ENSAPLG00020006356	2.198	7.7	1.80867	3.7117e-07	5.27652e-06	L3MBTL3	XP_038032679.1 lethal(3)malignant brain tumor-like protein 3 isoform X4 [Anas platyrhynchos]
ENSAPLG00020007635	116.977	33.4903	-1.8044	3.77982e-07	5.36822e-06	LCAT	NP_001297299.1 phosphatidylcholine-sterol acyltransferase precursor [Anas platyrhynchos]
MSTRG.9980	5.05833	0.987	-2.35754	3.83509e-07	5.4415e-06	lhfpl7	XP_027327738.1 taxid=8839 transmembrane protein 211 [Anas platyrhynchos]
ENSAPLG00020002400	9.375	24.7033	1.39782	3.96507e-07	5.61516e-06	PCYOX1L	XP_027320675.2 prenylcysteine oxidase-like [Anas platyrhynchos]
ENSAPLG00020004381	10.7843	2.34667	-2.20025	4.05382e-07	5.73536e-06	C8orf37	XP_027308290.1 protein C8orf37 homolog [Anas platyrhynchos]
ENSAPLG00020006668	304.709	742.115	1.28421	4.23368e-07	5.98411e-06	CA2	XP_027308233.1 carbonic anhydrase 2 isoform X1 [Anas platyrhynchos]
ENSAPLG00020004534	19.679	76.512	1.95903	4.26729e-07	6.02587e-06	NMES1	XP_005019536.1 normal mucosa of esophagus-specific gene 1 protein [Anas platyrhynchos]
ENSAPLG00020000120	61.7543	25.895	-1.25387	4.29721e-07	6.06234e-06	Lpcat1	XP_038029579.1 lysophosphatidylcholine acyltransferase 1 [Anas platyrhynchos]
MSTRG.7575	3.17467	13.533	2.0918	4.31696e-07	6.0844e-06	Col5a1	XP_038021075.1 taxid=8839 LOW QUALITY PROTEIN: collagen alpha-1(I) chain-like [Anas platyrhynchos]
MSTRG.16337	0.0603333	7.78833	7.01222	4.32787e-07	6.09399e-06	IL12B	XP_038034251.1 taxid=8839 interleukin-12 subunit beta-like [Anas platyrhynchos]
ENSAPLG00020005489	10.07	29.8807	1.56915	4.34612e-07	6.11387e-06	Gpatch3	XP_027299682.2 G patch domain-containing protein 3 [Anas platyrhynchos]
ENSAPLG00020003894	120.025	47.6133	-1.3339	4.58733e-07	6.44155e-06	NDUFAF2	XP_032061670.1 NADH dehydrogenase [ubiquinone] 1 alpha subcomplex assembly factor 2 [Aythya fuligula]
ENSAPLG00020005812	46.1773	22.7337	-1.02235	4.58775e-07	6.44155e-06	NAT10	XP_027314130.1 RNA cytidine acetyltransferase [Anas platyrhynchos]
ENSAPLG00020007012	1.003	11.9113	3.56994	4.64433e-07	6.51481e-06	TP53I11	XP_038035345.1 tumor protein p53-inducible protein 11 [Anas platyrhynchos]
ENSAPLG00020011144	87.4617	189.466	1.11521	4.74065e-07	6.64364e-06	REL	XP_027309078.1 proto-oncogene c-Rel [Anas platyrhynchos]
ENSAPLG00020006675	101.273	42.6683	-1.24701	4.8346e-07	6.7689e-06	RFNG	XP_027327387.1 beta-1,3-N-acetylglucosaminyltransferase radical fringe [Anas platyrhynchos]
ENSAPLG00020015669	23.748	6.51567	-1.86582	4.84736e-07	6.78035e-06	--	XP_027300664.2 LOW QUALITY PROTEIN: uncharacterized protein LOC113839922 [Anas platyrhynchos]
ENSAPLG00020018031	0.001	1.681	10.7151	4.90879e-07	6.85479e-06	ITGB6	XP_012961737.1 integrin beta-6 isoform X1 [Anas platyrhynchos]
ENSAPLG00020012896	0.049	8.19467	7.38576	4.90983e-07	6.85479e-06	CD93	XP_038031863.1 LOW QUALITY PROTEIN: thrombomodulin [Anas platyrhynchos]
ENSAPLG00020015523	2.079	30.0247	3.85219	4.99298e-07	6.96432e-06	TAGLN	XP_027300232.1 transgelin [Anas platyrhynchos]
ENSAPLG00020001479	253.879	124.503	-1.02796	5.04197e-07	7.02603e-06	VPS39	XP_032044656.1 vam6/Vps39-like protein isoform X1 [Aythya fuligula]
ENSAPLG00020007178	108.533	239.088	1.13941	5.10499e-07	7.10049e-06	--	XP_005021265.1 lymphocyte antigen 96 [Anas platyrhynchos]
ENSAPLG00020013182	141.87	69.1763	-1.03622	5.23357e-07	7.27251e-06	CD244	XP_032060184.1 LOW QUALITY PROTEIN: natural killer cell receptor 2B4-like [Aythya fuligula]
ENSAPLG00020013817	21.6367	48.5907	1.1672	5.26681e-07	7.31183e-06	Rb1cc1	XP_027307889.1 RB1-inducible coiled-coil protein 1 isoform X1 [Anas platyrhynchos]
ENSAPLG00020017796	61.6733	26.5653	-1.2151	5.3692e-07	7.44699e-06	FAAH2	XP_027320929.1 fatty-acid amide hydrolase 2 isoform X2 [Anas platyrhynchos]
ENSAPLG00020017691	0.966333	6.272	2.69833	5.41312e-07	7.50089e-06	HDC	XP_012961841.3 histidine decarboxylase [Anas platyrhynchos]
ENSAPLG00020010547	72.6253	30.314	-1.26049	5.61538e-07	7.77389e-06	chchd6-b	XP_027323301.1 MICOS complex subunit MIC25 isoform X2 [Anas platyrhynchos]
ENSAPLG00020011561	498.466	1192.07	1.2579	5.63356e-07	7.79177e-06	His3.3A	QNG40051.1 histone 3 [Lymnaea stagnalis]
ENSAPLG00020010190	5.94033	24.1953	2.02611	5.73833e-07	7.92928e-06	Mctp1	XP_038025714.1 multiple C2 and transmembrane domain-containing protein 1 isoform X5 [Anas platyrhynchos]
ENSAPLG00020017316	54.3177	150.074	1.46618	5.8072e-07	8.01696e-06	TOR1AIP1	XP_032048610.1 torsin-1A-interacting protein 1-like isoform X2 [Aythya fuligula]
ENSAPLG00020002377	15.6587	36.6717	1.2277	5.96607e-07	8.21332e-06	RESF1	XP_012964731.1 retroelement silencing factor 1 isoform X1 [Anas platyrhynchos]
MSTRG.18503	6.69933	1.482	-2.17647	6.14746e-07	8.45519e-06	--	-
ENSAPLG00020015748	0.001	4.97633	12.2809	6.15885e-07	8.463e-06	ISL2	XP_027321411.1 insulin gene enhancer protein ISL-2 [Anas platyrhynchos]
ENSAPLG00020008316	41.0057	13.1627	-1.63937	6.16876e-07	8.46875e-06	SNX30	XP_038026068.1 sorting nexin-30 [Anas platyrhynchos]
MSTRG.19032	1.11967	3.93667	1.81391	6.21866e-07	8.52935e-06	--	-
ENSAPLG00020008328	173.259	362.957	1.06687	6.28058e-07	8.60631e-06	ZDHHC20	XP_038031223.1 LOW QUALITY PROTEIN: palmitoyltransferase ZDHHC20-like [Anas platyrhynchos]
ENSAPLG00020002460	0.0823333	3.10467	5.23682	6.34006e-07	8.67979e-06	AFAP1L1	XP_027320673.1 actin filament-associated protein 1-like 1 isoform X2 [Anas platyrhynchos]
ENSAPLG00020014645	85.8557	30.8997	-1.47432	6.44229e-07	8.8116e-06	GGCT	XP_027306931.1 gamma-glutamylcyclotransferase [Anas platyrhynchos]
ENSAPLG00020008108	3.001	9.191	1.61478	6.51593e-07	8.90411e-06	ADAP1	XP_027306195.1 arf-GAP with dual PH domain-containing protein 1 [Anas platyrhynchos]
ENSAPLG00020010856	245.815	97.4193	-1.33529	6.54405e-07	8.93428e-06	ACSS2	XP_027298631.1 acetyl-coenzyme A synthetase, cytoplasmic isoform X3 [Anas platyrhynchos]
ENSAPLG00020012929	787.538	355.888	-1.14593	6.57955e-07	8.97448e-06	RAB32	XP_005021608.1 ras-related protein Rab-32 [Anas platyrhynchos]
ENSAPLG00020015894	59.0803	166.916	1.49837	6.74709e-07	9.19454e-06	Plxnb2	XP_038029315.1 plexin-B2 [Anas platyrhynchos]
ENSAPLG00020006059	22.4237	63.082	1.49221	6.92041e-07	9.42206e-06	Dtx2	XP_027327868.1 probable E3 ubiquitin-protein ligase DTX2 isoform X4 [Anas platyrhynchos]
ENSAPLG00020003306	41.6577	19.781	-1.07447	6.9274e-07	9.42292e-06	ACOT1	EOA99756.1 Acyl-coenzyme A thioesterase 2, mitochondrial, partial [Anas platyrhynchos]
ENSAPLG00020011824	39.9103	14.4793	-1.46277	6.97788e-07	9.48287e-06	TBC1D13	XP_027326672.2 TBC1 domain family member 13 [Anas platyrhynchos]
ENSAPLG00020008788	2.15467	10.6757	2.30879	7.12742e-07	9.67722e-06	KAZN	XP_032057338.1 kazrin isoform X1 [Aythya fuligula]
ENSAPLG00020004389	102.592	45.8737	-1.16118	7.16146e-07	9.71454e-06	DDX47	KAF1628334.1 putative ATP-dependent RNA helicase DDX47, partial [Eudyptes filholi]
MSTRG.7574	0.861	8.11133	3.23585	7.46485e-07	1.01168e-05	--	OXB80682.1 taxid=9014 hypothetical protein H355_005611 [Colinus virginianus]
MSTRG.11777	0.519333	8.81167	4.08468	7.47535e-07	1.01218e-05	--	XP_027300670.2 taxid=8839 regulator of hemoglobinization and erythroid cell expansion protein [Anas platyrhynchos]
ENSAPLG00020014406	195.394	85.909	-1.1855	7.57211e-07	1.02434e-05	TIMM23	XP_027316462.1 mitochondrial import inner membrane translocase subunit Tim23 [Anas platyrhynchos]
ENSAPLG00020016856	53.4527	24.4843	-1.1264	7.58291e-07	1.02487e-05	CHEK2	XP_038043411.1 serine/threonine-protein kinase Chk2 isoform X2 [Anas platyrhynchos]
MSTRG.21643	0.017	2.709	7.31608	7.59923e-07	1.02614e-05	--	-
ENSAPLG00020001811	67.254	147.848	1.13642	7.68032e-07	1.03614e-05	--	XP_038021894.1 interferon alpha/beta receptor 2 isoform X2 [Anas platyrhynchos]
ENSAPLG00020003267	64.2217	27.7287	-1.21168	7.81785e-07	1.05374e-05	CPSF7	XP_038035632.1 LOW QUALITY PROTEIN: cleavage and polyadenylation specificity factor subunit 7 [Anas platyrhynchos]
ENSAPLG00020009694	81.042	39.623	-1.03233	7.8692e-07	1.0597e-05	VPS45	XP_027300278.1 vacuolar protein sorting-associated protein 45 isoform X1 [Anas platyrhynchos]
ENSAPLG00020007072	9.27233	49.887	2.42766	7.90124e-07	1.06264e-05	MCOLN3	XP_038038537.1 mucolipin-3 isoform X1 [Anas platyrhynchos]
ENSAPLG00020005799	6.89533	86.3677	3.6468	7.90542e-07	1.06264e-05	Abhd3	XP_027307764.1 phospholipase ABHD3 isoform X2 [Anas platyrhynchos]
ENSAPLG00020005043	27.9197	6.65667	-2.06841	7.92214e-07	1.06392e-05	SCUBE2	XP_027317236.2 signal peptide, CUB and EGF-like domain-containing protein 2 isoform X1 [Anas platyrhynchos]
ENSAPLG00020013464	100.255	44.684	-1.16585	7.92962e-07	1.06396e-05	WDFY4	XP_012957577.1 WD repeat- and FYVE domain-containing protein 4 isoform X2 [Anas platyrhynchos]
ENSAPLG00020013298	11.383	55.3343	2.28129	7.99006e-07	1.0711e-05	CCL20	XP_005025540.1 C-C motif chemokine 20 [Anas platyrhynchos]
ENSAPLG00020012298	5.47	19.052	1.80033	8.16687e-07	1.09381e-05	SLBP	XP_027311503.1 uncharacterized protein LOC101791777 [Anas platyrhynchos]
ENSAPLG00020007663	14.4113	42.243	1.55151	8.17954e-07	1.09452e-05	DDA1	XP_009484689.1 PREDICTED: DET1- and DDB1-associated protein 1 [Pelecanus crispus]
ENSAPLG00020014403	0.114333	2.61667	4.51641	8.2463e-07	1.10246e-05	ogdhl	XP_027316178.1 2-oxoglutarate dehydrogenase-like, mitochondrial [Anas platyrhynchos]
ENSAPLG00020017030	242.594	111.382	-1.12303	8.33401e-07	1.11318e-05	ALDH3A2	XP_027328488.2 aldehyde dehydrogenase family 3 member A2-like isoform X3 [Anas platyrhynchos]
ENSAPLG00020006667	17.034	6.10533	-1.48028	8.38627e-07	1.11915e-05	RGL1	XP_038039081.1 ral guanine nucleotide dissociation stimulator-like 1 isoform X1 [Anas platyrhynchos]
ENSAPLG00020003514	6.288	44.819	2.83344	8.40404e-07	1.12051e-05	SPRY1	XP_005015614.2 protein sprouty homolog 1 [Anas platyrhynchos]
ENSAPLG00020001865	39.8273	8.076	-2.30205	8.68892e-07	1.15641e-05	FGL2	XP_005013718.2 fibroleukin [Anas platyrhynchos]
ENSAPLG00020017377	28.4847	13.4917	-1.07812	8.8333e-07	1.17457e-05	D2HGDH	XP_027319913.2 D-2-hydroxyglutarate dehydrogenase, mitochondrial [Anas platyrhynchos]
ENSAPLG00020004991	4.628	21.0747	2.18705	8.86128e-07	1.17601e-05	CNST	XP_027309661.1 consortin isoform X2 [Anas platyrhynchos]
ENSAPLG00020017941	34.6167	10.9643	-1.65865	8.86285e-07	1.17601e-05	PGRMC1	XP_027321077.1 membrane-associated progesterone receptor component 1 [Anas platyrhynchos]
ENSAPLG00020007637	18.396	3.332	-2.46493	8.86793e-07	1.17601e-05	FAHD2	XP_038027825.1 fumarylacetoacetate hydrolase domain-containing protein 2 [Anas platyrhynchos]
ENSAPLG00020003181	54.5583	17.5917	-1.63291	8.8911e-07	1.17761e-05	RIHB	XP_027315068.1 midkine [Anas platyrhynchos]
ENSAPLG00020014800	72.1453	31.5903	-1.19142	8.89587e-07	1.17761e-05	GPD1L	XP_027306903.1 glycerol-3-phosphate dehydrogenase 1-like protein [Anas platyrhynchos]
ENSAPLG00020005542	20.6023	45.1773	1.13279	8.99119e-07	1.1881e-05	DCP1B	XP_005010274.2 mRNA-decapping enzyme 1B [Anas platyrhynchos]
ENSAPLG00020005428	230.792	107.745	-1.09897	9.02559e-07	1.19148e-05	GNPDA1	XP_021130132.2 LOW QUALITY PROTEIN: glucosamine-6-phosphate isomerase 1 [Anas platyrhynchos]
ENSAPLG00020004484	6.952	22.407	1.68845	9.03283e-07	1.19148e-05	SARS1	XP_027300653.1 LOW QUALITY PROTEIN: serine--tRNA ligase, cytoplasmic [Anas platyrhynchos]
ENSAPLG00020015148	2.90133	8.96	1.62678	9.24306e-07	1.21704e-05	Mfsd6	XP_038037969.1 LOW QUALITY PROTEIN: major facilitator superfamily domain-containing protein 6 [Anas platyrhynchos]
ENSAPLG00020015127	0.119	6.70433	5.81606	9.33765e-07	1.22841e-05	NUAK2	XP_027300601.2 NUAK family SNF1-like kinase 2 isoform X1 [Anas platyrhynchos]
ENSAPLG00020007391	0.0756667	3.04833	5.33222	9.52368e-07	1.25177e-05	NEUROD1	XP_032046455.1 neurogenic differentiation factor 1 [Aythya fuligula]
MSTRG.16935	0.001	8.59633	13.0695	9.54631e-07	1.25363e-05	--	XP_066042843.1 taxid=190680 uncharacterized protein [Chamaea fasciata]
MSTRG.9200	4.15367	0.841333	-2.30364	1.02014e-06	1.3361e-05	--	-
ENSAPLG00020004485	7.39833	18.552	1.3263	1.03903e-06	1.35965e-05	HELQ	XP_027312698.1 helicase POLQ-like isoform X1 [Anas platyrhynchos]
ENSAPLG00020016275	0.373	16.5033	5.46744	1.04883e-06	1.37126e-05	EPHA2	XP_038022621.1 ephrin type-A receptor 2 isoform X4 [Anas platyrhynchos]
ENSAPLG00020004782	159.139	72.1513	-1.14119	1.0718e-06	1.40005e-05	SNAP29	XP_005021223.2 synaptosomal-associated protein 29 [Anas platyrhynchos]
ENSAPLG00020004373	146.499	36.4817	-2.00565	1.09251e-06	1.42584e-05	HEBP1	XP_027309146.1 heme-binding protein 1 [Anas platyrhynchos]
MSTRG.8242	19.3977	53.514	1.46403	1.09675e-06	1.43011e-05	--	XP_040403702.1 taxid=8869 pH-response regulator protein palI/prr-5-like [Cygnus olor]
ENSAPLG00020006481	23.6197	9.42167	-1.32593	1.10145e-06	1.43498e-05	ENTPD7	XP_027316138.2 LOW QUALITY PROTEIN: ectonucleoside triphosphate diphosphohydrolase 7 [Anas platyrhynchos]
ENSAPLG00020004787	52.7397	22.4443	-1.23254	1.11104e-06	1.44621e-05	Cltc	XP_027325725.1 clathrin heavy chain 2 isoform X2 [Anas platyrhynchos]
ENSAPLG00020005686	15.721	4.811	-1.70828	1.15636e-06	1.50256e-05	PPP1R9A	XP_021135343.2 neurabin-1 isoform X1 [Anas platyrhynchos]
ENSAPLG00020014842	156.201	77.1197	-1.01823	1.15849e-06	1.50401e-05	UHMK1	XP_032048314.1 serine/threonine-protein kinase Kist [Aythya fuligula]
MSTRG.17562	0.723	4.734	2.71099	1.16254e-06	1.50794e-05	--	EOB03174.1 taxid=8839 hypothetical protein Anapl_08491 [Anas platyrhynchos]
ENSAPLG00020005914	17.3917	68.997	1.98814	1.17979e-06	1.52898e-05	GPR65	XP_005017874.1 psychosine receptor [Anas platyrhynchos]
ENSAPLG00020010725	2.328	0.033	-6.14048	1.18488e-06	1.53423e-05	Ttn	XP_038038006.1 titin isoform X6 [Anas platyrhynchos]
ENSAPLG00020005655	57.492	21.0633	-1.44863	1.19137e-06	1.54129e-05	ACSF2	XP_038021208.1 LOW QUALITY PROTEIN: medium-chain acyl-CoA ligase ACSF2, mitochondrial [Anas platyrhynchos]
ENSAPLG00020017039	35.1513	15.575	-1.17435	1.19598e-06	1.54591e-05	SORT1	XP_040547393.1 sortilin [Gallus gallus]
MSTRG.16475	53.3477	24.528	-1.121	1.20664e-06	1.55833e-05	RAB11FIP5	XP_027311656.2 taxid=8839 rab11 family-interacting protein 5 isoform X2 [Anas platyrhynchos]
ENSAPLG00020017473	4.563	0.303	-3.91259	1.23137e-06	1.58888e-05	SGIP1	XP_032047994.1 SH3-containing GRB2-like protein 3-interacting protein 1 isoform X1 [Aythya fuligula]
ENSAPLG00020017981	402.919	1048.5	1.37976	1.23366e-06	1.59044e-05	HMOX1	XP_005015402.3 heme oxygenase 1 [Anas platyrhynchos]
ENSAPLG00020011445	3.29	15.5033	2.23642	1.24204e-06	1.59986e-05	--	PKU36053.1 rna-directed dna polymerase from mobile element jockey-like [Limosa lapponica baueri]
ENSAPLG00020005174	0.052	5.411	6.70124	1.24489e-06	1.60214e-05	PPBP	XP_032042112.1 interleukin-8-like [Aythya fuligula]
ENSAPLG00020013885	1.60833	0.137333	-3.54981	1.2559e-06	1.6135e-05	TANC2	XP_035203845.1 protein TANC2 isoform X10 [Oxyura jamaicensis]
MSTRG.4033	0.689667	7.443	3.43191	1.2591e-06	1.6162e-05	--	-
ENSAPLG00020001526	114.083	45.461	-1.32738	1.26589e-06	1.62268e-05	TRAM2	EOB05379.1 Translocation-associated membrane protein 2, partial [Anas platyrhynchos]
ENSAPLG00020015852	12.978	32.066	1.30498	1.26633e-06	1.62268e-05	Gramd4	XP_032056562.1 GRAM domain-containing protein 4 isoform X2 [Aythya fuligula]
ENSAPLG00020013477	25.804	73.9187	1.51834	1.27879e-06	1.63722e-05	Stx11	EOB03990.1 Syntaxin-11, partial [Anas platyrhynchos]
ENSAPLG00020008532	4.144	11.548	1.47855	1.29524e-06	1.65532e-05	SLC25A19	XP_038021174.1 mitochondrial thiamine pyrophosphate carrier [Anas platyrhynchos]
ENSAPLG00020000999	6.35267	2.39933	-1.40473	1.29705e-06	1.65532e-05	mapkbp1	XP_027314897.1 mitogen-activated protein kinase-binding protein 1 isoform X3 [Anas platyrhynchos]
ENSAPLG00020014555	41.1647	130.651	1.66624	1.29739e-06	1.65532e-05	CITED3	XP_027299884.1 cbp/p300-interacting transactivator 4 [Anas platyrhynchos]
ENSAPLG00020016561	199.416	83.349	-1.25855	1.31206e-06	1.67259e-05	NFATC3	XP_027322953.1 nuclear factor of activated T-cells, cytoplasmic 3 isoform X1 [Anas platyrhynchos]
ENSAPLG00020006751	19.325	7.17167	-1.43009	1.347e-06	1.71566e-05	NEURL1B	XP_038042420.1 E3 ubiquitin-protein ligase NEURL1B isoform X3 [Anas platyrhynchos]
ENSAPLG00020013027	540.907	229.473	-1.23706	1.35669e-06	1.72651e-05	ARL6IP1	XP_032053658.1 ADP-ribosylation factor-like protein 6-interacting protein 1 [Aythya fuligula]
ENSAPLG00020013254	45.3373	20.2887	-1.16003	1.36617e-06	1.73708e-05	Man1a1	XP_035394521.1 mannosyl-oligosaccharide 1,2-alpha-mannosidase IA [Cygnus atratus]
ENSAPLG00020001524	25.8933	9.28233	-1.48002	1.3769e-06	1.74923e-05	CTH	XP_027318986.2 cystathionine gamma-lyase [Anas platyrhynchos]
ENSAPLG00020012234	28.5843	12.8347	-1.15518	1.37968e-06	1.75126e-05	ABCC4	XP_027299028.1 multidrug resistance-associated protein 4 isoform X1 [Anas platyrhynchos]
ENSAPLG00020001614	86.1083	26.7067	-1.68895	1.39479e-06	1.76892e-05	CD36	XP_038039630.1 LOW QUALITY PROTEIN: platelet glycoprotein 4 [Anas platyrhynchos]
ENSAPLG00020003007	3.08167	0.500667	-2.62179	1.40861e-06	1.7834e-05	GPRC5C	XP_032055825.1 G-protein coupled receptor family C group 5 member C [Aythya fuligula]
ENSAPLG00020000827	14.5223	3.881	-1.90377	1.42055e-06	1.79698e-05	CCSER1	XP_027311520.1 serine-rich coiled-coil domain-containing protein 1 isoform X4 [Anas platyrhynchos]
MSTRG.13173	0.0173333	3.04833	7.45833	1.42279e-06	1.79767e-05	--	EOB02547.1 taxid=8839 hypothetical protein Anapl_11608 [Anas platyrhynchos]
ENSAPLG00020012862	25.4013	9.94967	-1.35218	1.42426e-06	1.79767e-05	ALDH6A1	XP_040413876.1 methylmalonate-semialdehyde dehydrogenase [acylating], mitochondrial [Cygnus olor]
MSTRG.13976	10.5113	3.01833	-1.80012	1.42474e-06	1.79767e-05	PIGM	XP_005023671.2 taxid=8839 GPI mannosyltransferase 1 [Anas platyrhynchos]
MSTRG.13331	0.212	4.33133	4.35268	1.44091e-06	1.81653e-05	METTL24	XP_027310518.2 taxid=8839 methyltransferase-like protein 24 [Anas platyrhynchos]
ENSAPLG00020015098	10.0103	1.07233	-3.22266	1.45129e-06	1.82806e-05	GABRD	EOB07555.1 Gamma-aminobutyric acid receptor subunit delta, partial [Anas platyrhynchos]
ENSAPLG00020002837	13.339	4.59233	-1.53835	1.47716e-06	1.85907e-05	HEPH	XP_038040603.1 LOW QUALITY PROTEIN: hephaestin [Anas platyrhynchos]
MSTRG.16333	3.54133	17.4073	2.29733	1.50792e-06	1.89616e-05	BNIP3L	XP_032042882.1 taxid=219594 BCL2/adenovirus E1B 19 kDa protein-interacting protein 3-like [Aythya fuligula]
ENSAPLG00020002875	45.9713	92.2917	1.00547	1.51576e-06	1.9044e-05	MYO1G	XP_032039179.1 unconventional myosin-Ig [Aythya fuligula]
ENSAPLG00020016642	138.789	65.3607	-1.0864	1.51718e-06	1.90457e-05	UHRF1BP1	XP_027300687.2 LOW QUALITY PROTEIN: UHRF1-binding protein 1 [Anas platyrhynchos]
ENSAPLG00020001293	3.35133	12.0913	1.85117	1.54626e-06	1.93865e-05	TNFRSF11B	XP_005017766.3 tumor necrosis factor receptor superfamily member 11B [Anas platyrhynchos]
ENSAPLG00020012975	5.55733	17.3483	1.64233	1.56484e-06	1.95942e-05	BTN3A3	XP_027328449.2 butyrophilin subfamily 1 member A1 [Anas platyrhynchos]
ENSAPLG00020011045	11.3063	3.48833	-1.69652	1.57214e-06	1.9669e-05	PHR	XP_032049465.1 deoxyribodipyrimidine photo-lyase-like [Aythya fuligula]
ENSAPLG00020004833	55.068	27.22	-1.01655	1.60275e-06	2.00351e-05	DGCR2	XP_027326053.1 integral membrane protein DGCR2/IDD isoform X2 [Anas platyrhynchos]
ENSAPLG00020017627	0.059	2.22533	5.23716	1.60835e-06	2.00881e-05	HTR2C	XP_005016654.1 5-hydroxytryptamine receptor 2A isoform X1 [Anas platyrhynchos]
ENSAPLG00020001196	192.575	68.2607	-1.49629	1.62027e-06	2.02199e-05	RCBTB1	EOB04540.1 RCC1 and BTB domain-containing protein 1, partial [Anas platyrhynchos]
ENSAPLG00020003001	7.51333	25.5193	1.76407	1.71354e-06	2.12699e-05	Slco2b1	XP_038034508.1 LOW QUALITY PROTEIN: solute carrier organic anion transporter family member 2B1 [Anas platyrhynchos]
ENSAPLG00020007313	0.516667	17.3107	5.06628	1.71446e-06	2.12699e-05	IL36RN	XP_040394233.1 uncharacterized protein LOC121060464 [Cygnus olor]
ENSAPLG00020002841	3.26467	0.477667	-2.77286	1.75277e-06	2.1711e-05	CHSY3	XP_027301959.2 chondroitin sulfate synthase 3 [Anas platyrhynchos]
ENSAPLG00020010415	27.8217	60.2877	1.11565	1.75294e-06	2.1711e-05	CLK1	XP_027317706.1 dual specificity protein kinase CLK1 isoform X2 [Anas platyrhynchos]
ENSAPLG00020018253	53.403	127.916	1.26021	1.79497e-06	2.22129e-05	SUSD3	XP_038042044.1 sushi domain-containing protein 3 [Anas platyrhynchos]
ENSAPLG00020004825	38.7153	18.946	-1.03101	1.85182e-06	2.28783e-05	SLC10A7	XP_038033967.1 sodium/bile acid cotransporter 7 isoform X1 [Anas platyrhynchos]
ENSAPLG00020009137	28.9803	66.002	1.18744	1.85385e-06	2.28842e-05	ARL14EP	XP_012957414.2 ARL14 effector protein isoform X1 [Anas platyrhynchos]
ENSAPLG00020003733	51.5057	21.8893	-1.2345	1.91245e-06	2.35879e-05	ALDH7A1	XP_027302285.1 alpha-aminoadipic semialdehyde dehydrogenase [Anas platyrhynchos]
ENSAPLG00020009682	0.261333	2.06233	2.98031	1.98877e-06	2.45089e-05	NGFR	XP_030364852.1 tumor necrosis factor receptor superfamily member 16 isoform X1 [Strigops habroptila]
ENSAPLG00020012342	8.82533	31.453	1.83347	2.04245e-06	2.51494e-05	Clec4e	XP_032056870.1 C-type lectin domain family 4 member D-like [Aythya fuligula]
ENSAPLG00020006819	1.129	44.8043	5.31052	2.07017e-06	2.54273e-05	CCN2	XP_027310310.1 CCN family member 2 [Anas platyrhynchos]
ENSAPLG00020004673	40.7337	19.8497	-1.03711	2.09574e-06	2.57201e-05	tbc1d24	XP_027324767.1 TBC1 domain family member 24 isoform X1 [Anas platyrhynchos]
MSTRG.20844	23.2653	48.8787	1.07102	2.10527e-06	2.58156e-05	--	XP_038028129.1 taxid=8839 uncharacterized protein LOC119715044 [Anas platyrhynchos]
ENSAPLG00020016042	10.4287	50.9167	2.28758	2.15759e-06	2.64135e-05	gfod1	XP_038030358.1 glucose-fructose oxidoreductase domain-containing protein 1 isoform X2 [Anas platyrhynchos]
ENSAPLG00020016543	5.07333	26.112	2.36371	2.16791e-06	2.6496e-05	CYP2J2	XP_005022956.1 LOW QUALITY PROTEIN: cytochrome P450 2J2 [Anas platyrhynchos]
ENSAPLG00020018302	0.0423333	5.669	7.06516	2.19237e-06	2.67729e-05	COL6A2	EOA97575.1 Collagen alpha-2(VI) chain, partial [Anas platyrhynchos]
ENSAPLG00020001506	0.666333	4.26133	2.67699	2.19867e-06	2.68278e-05	PPP2R3A	XP_027319816.1 serine/threonine-protein phosphatase 2A regulatory subunit B'' subunit alpha isoform X2 [Anas platyrhynchos]
ENSAPLG00020007848	3.42367	25.9577	2.92255	2.21351e-06	2.69866e-05	Plvap	XP_027328211.2 plasmalemma vesicle-associated protein isoform X2 [Anas platyrhynchos]
ENSAPLG00020000238	19.267	6.246	-1.62513	2.23522e-06	2.72289e-05	GUF1	XP_027312955.1 translation factor GUF1, mitochondrial isoform X1 [Anas platyrhynchos]
ENSAPLG00020007092	0.0996667	2.54133	4.67233	2.24782e-06	2.73598e-05	Lpar3	XP_005022350.1 lysophosphatidic acid receptor 3 [Anas platyrhynchos]
ENSAPLG00020008711	24.9917	78.5383	1.65195	2.26538e-06	2.7551e-05	TNIK	XP_032302617.1 TRAF2 and NCK-interacting protein kinase [Coturnix japonica]
ENSAPLG00020006663	15.886	39.5053	1.31429	2.28486e-06	2.77651e-05	SNAPC1	XP_027314927.1 snRNA-activating protein complex subunit 1 [Anas platyrhynchos]
ENSAPLG00020016500	78.4937	38.331	-1.03406	2.2896e-06	2.77999e-05	REPS2	XP_038028865.1 ralBP1-associated Eps domain-containing protein 2 isoform X1 [Anas platyrhynchos]
MSTRG.17092	3.075	15.3133	2.31613	2.32402e-06	2.81856e-05	--	-
ENSAPLG00020011881	9.666	1.72433	-2.48688	2.32518e-06	2.81856e-05	Tpk1	XP_027307111.1 thiamin pyrophosphokinase 1 isoform X8 [Anas platyrhynchos]
ENSAPLG00020009793	34.3023	12.8843	-1.41269	2.34479e-06	2.84002e-05	HES1	XP_035200726.1 transcription factor HES-4 isoform X1 [Oxyura jamaicensis]
ENSAPLG00020017923	25.7263	66.034	1.35996	2.37041e-06	2.8687e-05	UPF3B	XP_027321244.2 regulator of nonsense transcripts 3B [Anas platyrhynchos]
ENSAPLG00020008420	56.6637	123.708	1.12645	2.37344e-06	2.87002e-05	CD40	XP_027298752.1 tumor necrosis factor receptor superfamily member 5 [Anas platyrhynchos]
ENSAPLG00020006908	7.26467	21.5283	1.56727	2.37594e-06	2.87071e-05	VNN1	XP_012952002.3 pantetheinase isoform X2 [Anas platyrhynchos]
ENSAPLG00020001558	42.6843	118.559	1.47382	2.43221e-06	2.93593e-05	CARS1	XP_027314221.1 cysteine--tRNA ligase, cytoplasmic isoform X1 [Anas platyrhynchos]
ENSAPLG00020002670	0.191667	3.90367	4.34816	2.43389e-06	2.93593e-05	Fam3d	EOA96114.1 Protein FAM3D, partial [Anas platyrhynchos]
ENSAPLG00020012886	1.812	0.001	-10.8234	2.46039e-06	2.96548e-05	CFH	XP_027318643.2 complement factor H isoform X2 [Anas platyrhynchos]
ENSAPLG00020008457	37.0203	16.7793	-1.14163	2.48021e-06	2.98693e-05	USB1	XP_013031939.1 PREDICTED: U6 snRNA phosphodiesterase, partial [Anser cygnoides domesticus]
ENSAPLG00020009507	70.218	32.5547	-1.10898	2.48742e-06	2.99075e-05	RRN3	XP_027324812.1 RNA polymerase I-specific transcription initiation factor RRN3 [Anas platyrhynchos]
ENSAPLG00020001224	79.128	32.9333	-1.26464	2.49851e-06	3.00165e-05	PHYH	XP_027316267.2 phytanoyl-CoA dioxygenase, peroxisomal [Anas platyrhynchos]
ENSAPLG00020004010	4.52	70.865	3.97068	2.55198e-06	3.06341e-05	F10	XP_005022007.2 coagulation factor X [Anas platyrhynchos]
ENSAPLG00020018403	95.285	42.301	-1.17156	2.55955e-06	3.07001e-05	Man1b1	XP_027326952.2 endoplasmic reticulum mannosyl-oligosaccharide 1,2-alpha-mannosidase isoform X1 [Anas platyrhynchos]
ENSAPLG00020004119	60.7807	29.8517	-1.0258	2.58274e-06	3.09532e-05	SLC27A1	XP_005018279.2 long-chain fatty acid transport protein 1 [Anas platyrhynchos]
ENSAPLG00020007714	14.1557	49.9327	1.8186	2.59245e-06	3.10445e-05	RHOC	KQL52077.1 hypothetical protein AAES_32336 [Amazona aestiva]
ENSAPLG00020005448	9.03267	2.71133	-1.73615	2.60289e-06	3.11191e-05	DYNC1I1	XP_009557149.1 PREDICTED: cytoplasmic dynein 1 intermediate chain 1 isoform X2 [Cuculus canorus]
ENSAPLG00020015883	53.429	14.6313	-1.86856	2.60509e-06	3.11203e-05	hdac10	XP_012956263.3 polyamine deacetylase HDAC10 isoform X1 [Anas platyrhynchos]
MSTRG.21215	15.215	4.95133	-1.61961	2.62365e-06	3.13167e-05	--	KAK4814242.1 taxid=33587 hypothetical protein QYF61_012738 [Mycteria americana]
MSTRG.9510	3.45467	0.0666667	-5.69544	2.62853e-06	3.13498e-05	--	-
ENSAPLG00020013146	21.5697	8.35067	-1.36904	2.66268e-06	3.1706e-05	CXXC5	XP_005010032.1 CXXC-type zinc finger protein 5 isoform X1 [Anas platyrhynchos]
ENSAPLG00020008387	274.926	918.057	1.73954	2.67498e-06	3.18269e-05	MMP9	XP_038022066.1 matrix metalloproteinase-9 [Anas platyrhynchos]
ENSAPLG00020012146	38.9247	18.077	-1.10653	2.67976e-06	3.18581e-05	ACR	XP_027317843.2 acrosin isoform X1 [Anas platyrhynchos]
ENSAPLG00020004394	38.5277	18.845	-1.03171	2.70459e-06	3.21276e-05	METTL14	XP_029881539.2 N6-adenosine-methyltransferase non-catalytic subunit isoform X3 [Aquila chrysaetos chrysaetos]
ENSAPLG00020008530	46.8237	22.37	-1.06567	2.72265e-06	3.23163e-05	RPS6KC1	XP_027309513.2 ribosomal protein S6 kinase delta-1 isoform X1 [Anas platyrhynchos]
ENSAPLG00020002173	4.55567	12.0047	1.39786	2.79804e-06	3.31845e-05	SLC26A2	XP_027321303.2 sulfate transporter isoform X1 [Anas platyrhynchos]
MSTRG.5390	2.444	13.5667	2.47275	2.81959e-06	3.33866e-05	--	XP_047913272.1 taxid=8845 alpha-1,3-mannosyl-glycoprotein 4-beta-N-acetylglucosaminyltransferase B [Anser cygnoides]
ENSAPLG00020010005	0.001	4.77767	12.2221	2.83104e-06	3.34953e-05	FHL1	TRZ12045.1 hypothetical protein HGM15179_015062 [Zosterops borbonicus]
ENSAPLG00020005103	6.311	0.971333	-2.69983	2.84396e-06	3.36214e-05	MTARC2	XP_027308914.2 mitochondrial amidoxime reducing component 2 [Anas platyrhynchos]
ENSAPLG00020018303	2.49367	7.685	1.62378	2.85777e-06	3.37577e-05	KIF24	XP_038025831.1 kinesin-like protein KIF24 isoform X2 [Anas platyrhynchos]
ENSAPLG00020004609	0.210667	2.606	3.6288	2.86737e-06	3.38442e-05	PPL	XP_027324559.2 LOW QUALITY PROTEIN: periplakin [Anas platyrhynchos]
ENSAPLG00020011478	24.1053	6.933	-1.7978	2.87278e-06	3.3881e-05	PLAT	XP_038022830.1 tissue-type plasminogen activator [Anas platyrhynchos]
ENSAPLG00020002253	165.993	79.1343	-1.06875	2.91767e-06	3.43557e-05	Gaa	XP_038042678.1 lysosomal alpha-glucosidase-like [Anas platyrhynchos]
ENSAPLG00020000121	12.8923	38.1247	1.56421	2.92799e-06	3.44498e-05	TSTA3	XP_038031239.1 GDP-L-fucose synthase isoform X2 [Anas platyrhynchos]
ENSAPLG00020017319	9.05433	21.3713	1.239	2.93612e-06	3.4518e-05	Tor1aip2	XP_032048530.1 torsin-1A-interacting protein 2-like [Aythya fuligula]
MSTRG.18288	0.312667	2.31033	2.8854	2.97057e-06	3.48954e-05	HEG1	XP_027316759.2 taxid=8839 protein HEG homolog 1 isoform X2 [Anas platyrhynchos]
ENSAPLG00020008983	42.5293	14.8847	-1.51463	2.97699e-06	3.49431e-05	--	XP_021124230.2 uncharacterized protein LOC101793077 [Anas platyrhynchos]
ENSAPLG00020015228	38.629	93.3897	1.27358	2.991e-06	3.50797e-05	TUT4	EOA95918.1 Zinc finger CCHC domain-containing protein 11, partial [Anas platyrhynchos]
ENSAPLG00020000486	84.1593	38.033	-1.14587	3.01868e-06	3.53764e-05	acat1-a	XP_038031648.1 acetyl-CoA acetyltransferase, mitochondrial isoform X2 [Anas platyrhynchos]
ENSAPLG00020008527	0.069	3.866	5.8081	3.0274e-06	3.54505e-05	F2RL1	XP_027302957.1 proteinase-activated receptor 2 isoform X2 [Anas platyrhynchos]
ENSAPLG00020004855	11.8767	30.607	1.36573	3.04845e-06	3.56464e-05	RCAN1	XP_027304945.1 calcipressin-1 isoform X1 [Anas platyrhynchos]
MSTRG.19862	4.70967	0.097	-5.6015	3.04895e-06	3.56464e-05	--	-
ENSAPLG00020006224	122.045	57.3493	-1.08956	3.11188e-06	3.63514e-05	Cux1	XP_038021848.1 homeobox protein cut-like 1 isoform X1 [Anas platyrhynchos]
ENSAPLG00020000512	48.2937	144.942	1.58557	3.2081e-06	3.74186e-05	KTN1	XP_035183213.1 kinectin isoform X2 [Oxyura jamaicensis]
ENSAPLG00020016294	35.2523	84.4867	1.261	3.27166e-06	3.81299e-05	TMCC3	XP_027307927.1 transmembrane and coiled-coil domain protein 3 isoform X1 [Anas platyrhynchos]
ENSAPLG00020000262	11.6313	25.594	1.13779	3.28482e-06	3.82532e-05	SMYD5	XP_005024034.3 SET and MYND domain-containing protein 5 [Anas platyrhynchos]
ENSAPLG00020006064	1.44567	6.736	2.22016	3.28761e-06	3.82556e-05	CDH17	EOA93934.1 Cadherin-17, partial [Anas platyrhynchos]
ENSAPLG00020017755	0.0183333	1.91433	6.70623	3.29067e-06	3.82612e-05	FLT4	XP_027324368.2 LOW QUALITY PROTEIN: vascular endothelial growth factor receptor 3 [Anas platyrhynchos]
MSTRG.2797	3.46667	0.103333	-5.06817	3.33023e-06	3.86907e-05	Trmt9b	XP_054660671.1 taxid=9117 probable tRNA methyltransferase 9B isoform X1 [Grus americana]
ENSAPLG00020002656	6.242	24.2283	1.95661	3.34167e-06	3.87932e-05	CLEC2D	XP_038043900.1 C-type lectin domain family 2 member B-like isoform X1 [Anas platyrhynchos]
ENSAPLG00020015574	26.2067	57.2393	1.12707	3.38661e-06	3.92841e-05	NAV1	XP_038024206.1 LOW QUALITY PROTEIN: neuron navigator 1 [Anas platyrhynchos]
ENSAPLG00020003789	52.7263	24.6757	-1.09543	3.44198e-06	3.98952e-05	PRKAR1B	XP_009284648.1 PREDICTED: cAMP-dependent protein kinase type I-beta regulatory subunit [Aptenodytes forsteri]
ENSAPLG00020011745	2496.77	966.061	-1.36988	3.53214e-06	4.08444e-05	LYZ	XP_005008937.2 lysozyme C [Anas platyrhynchos]
ENSAPLG00020000639	2.979	0.036	-6.37069	3.54664e-06	4.09513e-05	SLC6A15	EOB02115.1 Orphan sodium- and chloride-dependent neurotransmitter transporter NTT73, partial [Anas platyrhynchos]
ENSAPLG00020005652	45.2077	17.5543	-1.36474	3.54692e-06	4.09513e-05	RBKS	XP_027309856.1 ribokinase isoform X5 [Anas platyrhynchos]
MSTRG.129	0.172	5.30567	4.94705	3.56363e-06	4.11122e-05	--	KAI6074267.1 taxid=8832 Rna-directed dna polymerase from mobile element jockey-like [Aix galericulata]
ENSAPLG00020002144	68.5133	29.601	-1.21074	3.59146e-06	4.13844e-05	FLOT2	XP_009949061.1 PREDICTED: flotillin-2 [Leptosomus discolor]
ENSAPLG00020014157	9.719	45.1967	2.21734	3.59395e-06	4.13844e-05	CYP27B1	XP_040399726.1 25-hydroxyvitamin D-1 alpha hydroxylase, mitochondrial [Cygnus olor]
ENSAPLG00020005510	134.98	64.6967	-1.06099	3.59605e-06	4.13844e-05	RPIA	XP_038034056.1 ribose-5-phosphate isomerase [Anas platyrhynchos]
MSTRG.16484	10.5553	3.548	-1.57289	3.5984e-06	4.13844e-05	Shtn1	XP_027312113.2 taxid=8839 shootin-1-like isoform X1 [Anas platyrhynchos]
ENSAPLG00020014670	64.8927	30.1627	-1.10529	3.60762e-06	4.14582e-05	ANO10	XP_038029893.1 anoctamin-10 isoform X2 [Anas platyrhynchos]
ENSAPLG00020003051	9.193	2.02033	-2.18594	3.64583e-06	4.18324e-05	FDX1	XP_038040571.1 adrenodoxin-like [Anas platyrhynchos]
ENSAPLG00020011501	0.001	3.49967	11.773	3.68094e-06	4.22026e-05	MZB1	XP_027324223.1 LOW QUALITY PROTEIN: marginal zone B- and B1-cell-specific protein [Anas platyrhynchos]
MSTRG.3392	1.25533	6.30933	2.32942	3.68643e-06	4.22329e-05	--	-
MSTRG.15155	2.829	9.93767	1.81261	3.69265e-06	4.22715e-05	Ranbp2	XP_038022200.1 taxid=8839 RANBP2-like and GRIP domain-containing protein 8 isoform X1 [Anas platyrhynchos]
MSTRG.1946	1.08633	4.02967	1.89119	3.84327e-06	4.39277e-05	--	-
ENSAPLG00020015111	649.991	306.251	-1.0857	3.91604e-06	4.47249e-05	Nadk	XP_005011116.1 NAD kinase isoform X1 [Anas platyrhynchos]
ENSAPLG00020003873	411.296	196.414	-1.06628	3.92363e-06	4.47772e-05	WIPI1	XP_038021131.1 WD repeat domain phosphoinositide-interacting protein 1 [Anas platyrhynchos]
ENSAPLG00020008257	43.4077	17.9133	-1.27692	3.94101e-06	4.49409e-05	WDR41	XP_038026528.1 WD repeat-containing protein 41 isoform X1 [Anas platyrhynchos]
ENSAPLG00020017586	66.687	136.644	1.03494	3.99051e-06	4.54703e-05	SPRED1	XP_005009833.1 sprouty-related, EVH1 domain-containing protein 1 isoform X2 [Anas platyrhynchos]
ENSAPLG00020017808	0.001	1.31567	10.3616	4.0223e-06	4.57973e-05	Kcnh1	XP_032041553.1 potassium voltage-gated channel subfamily H member 1 [Aythya fuligula]
ENSAPLG00020008620	7.88067	2.235	-1.81804	4.09388e-06	4.65766e-05	Pard6g	XP_005517385.1 PREDICTED: partitioning defective 6 homolog gamma [Pseudopodoces humilis]
ENSAPLG00020008947	175.28	81.343	-1.10757	4.16286e-06	4.72524e-05	Tmem159	XP_027324717.2 lipid droplet assembly factor 1 [Anas platyrhynchos]
ENSAPLG00020003064	39.594	81.6473	1.04412	4.21411e-06	4.77976e-05	Il21r	XP_005018669.1 interleukin-21 receptor isoform X1 [Anas platyrhynchos]
ENSAPLG00020000615	220.307	93.5107	-1.23631	4.21759e-06	4.78004e-05	GSTK1	XP_021125849.2 glutathione S-transferase kappa 1 [Anas platyrhynchos]
ENSAPLG00020009868	11.948	2.958	-2.01408	4.2468e-06	4.80947e-05	She	XP_032060424.1 SH2 domain-containing adapter protein E [Aythya fuligula]
ENSAPLG00020016344	139.962	69.0917	-1.01845	4.35219e-06	4.92505e-05	YIPF1	XP_027318382.1 protein YIPF1 [Anas platyrhynchos]
ENSAPLG00020006084	4.88633	18.4883	1.91979	4.36459e-06	4.93532e-05	GSTT1	XP_005023587.1 glutathione S-transferase theta-2B [Anas platyrhynchos]
ENSAPLG00020013802	42.34	18.271	-1.21247	4.36859e-06	4.93608e-05	PCMTD1	NP_001026190.1 protein-L-isoaspartate O-methyltransferase domain-containing protein 1 [Gallus gallus]
ENSAPLG00020016331	21.1397	48.9113	1.21022	4.37577e-06	4.94041e-05	CASP1	XP_027301817.2 caspase-1 isoform X1 [Anas platyrhynchos]
ENSAPLG00020001152	23.7873	48.7067	1.03393	4.44577e-06	5.01562e-05	UBXN2A	XP_027311110.1 UBX domain-containing protein 2A [Anas platyrhynchos]
ENSAPLG00020010529	2.77433	12.8607	2.21275	4.45735e-06	5.02471e-05	ADA	XP_027328703.1 adenosine deaminase [Anas platyrhynchos]
ENSAPLG00020017102	3.43133	0.626333	-2.45377	4.5055e-06	5.07143e-05	ARMH1	XP_035393877.1 armadillo-like helical domain containing protein 1 isoform X3 [Cygnus atratus]
ENSAPLG00020013067	20.8123	9.735	-1.09619	4.59118e-06	5.16205e-05	--	XP_027329070.1 signal-regulatory protein beta-1 [Anas platyrhynchos]
MSTRG.8941	6.267	0.852333	-2.87829	4.59298e-06	5.16205e-05	--	-
ENSAPLG00020015284	2.69433	0.001	-11.3957	4.61575e-06	5.17978e-05	CASR	XP_027305513.2 LOW QUALITY PROTEIN: extracellular calcium-sensing receptor [Anas platyrhynchos]
ENSAPLG00020001780	4.81233	1.87133	-1.36267	4.64286e-06	5.20626e-05	STARD9	XP_038036101.1 stAR-related lipid transfer protein 9 isoform X2 [Anas platyrhynchos]
ENSAPLG00020010476	0.381667	11.1187	4.86453	4.7504e-06	5.3191e-05	--	XP_038027437.1 LOW QUALITY PROTEIN: interleukin-23 subunit alpha [Anas platyrhynchos]
ENSAPLG00020001943	2.68867	9.57733	1.83273	4.76474e-06	5.33082e-05	TDRD6	XP_012964686.3 tudor domain-containing protein 6 [Anas platyrhynchos]
ENSAPLG00020009494	0.131667	2.74267	4.38062	4.8354e-06	5.40579e-05	OSMR	XP_038025861.1 oncostatin-M-specific receptor subunit beta isoform X1 [Anas platyrhynchos]
ENSAPLG00020001241	65.209	30.407	-1.10067	4.85703e-06	5.42588e-05	HS1BP3	XP_027311106.2 HCLS1-binding protein 3 isoform X1 [Anas platyrhynchos]
ENSAPLG00020016037	7.44267	1.875	-1.98893	4.88361e-06	5.45146e-05	PHACTR1	XP_038030339.1 phosphatase and actin regulator 1 isoform X1 [Anas platyrhynchos]
MSTRG.3044	134.87	63.9267	-1.07708	4.93088e-06	5.50008e-05	CCDC90B	NXU87134.1 taxid=269412 CC90B protein [Xiphorhynchus elegans]
MSTRG.6282	7.66267	2.64533	-1.5344	4.96162e-06	5.53021e-05	--	-
ENSAPLG00020003887	238.901	109.107	-1.13067	5.03315e-06	5.60572e-05	Snx2	XP_038026497.1 sorting nexin-2 isoform X1 [Anas platyrhynchos]
ENSAPLG00020001881	17.9227	4.11467	-2.12294	5.1292e-06	5.7084e-05	PGGHG	XP_021134692.2 protein-glucosylgalactosylhydroxylysine glucosidase isoform X3 [Anas platyrhynchos]
ENSAPLG00020014991	25.4493	11.5843	-1.13545	5.13474e-06	5.71028e-05	CEP104	XP_027299162.2 centrosomal protein of 104 kDa isoform X2 [Anas platyrhynchos]
ENSAPLG00020017382	14.515	4.71733	-1.6215	5.14935e-06	5.72223e-05	Neu4	XP_032049211.1 sialidase-4 [Aythya fuligula]
ENSAPLG00020018239	0.203667	3.94933	4.27733	5.15622e-06	5.72557e-05	Cavin1	XP_013055225.1 PREDICTED: polymerase I and transcript release factor [Anser cygnoides domesticus]
MSTRG.6160	2.49133	11.456	2.20111	5.17038e-06	5.73699e-05	--	-
MSTRG.19223	0.128333	3.804	4.88955	5.17517e-06	5.73801e-05	--	RLW05894.1 taxid=44316 hypothetical protein DV515_00004962, partial [Chloebia gouldiae]
ENSAPLG00020017344	1.20367	4.83333	2.00558	5.19529e-06	5.75454e-05	NID2	XP_032043724.1 nidogen-2 isoform X5 [Aythya fuligula]
ENSAPLG00020016958	0.001	1.692	10.7245	5.19785e-06	5.75454e-05	Inava	XP_035170464.1 innate immunity activator protein isoform X2 [Oxyura jamaicensis]
ENSAPLG00020013302	407.373	182.727	-1.15666	5.28119e-06	5.84244e-05	SMPDL3A	XP_038032878.1 acid sphingomyelinase-like phosphodiesterase 3a [Anas platyrhynchos]
ENSAPLG00020015589	62.1947	27.4393	-1.18055	5.30532e-06	5.86476e-05	ADPRH	XP_005017691.3 ADP-ribosylarginine hydrolase isoform X1 [Anas platyrhynchos]
ENSAPLG00020000185	0.053	2.70133	5.67154	5.34965e-06	5.90935e-05	lgr5-a	XP_038020816.1 leucine-rich repeat-containing G-protein coupled receptor 5 isoform X1 [Anas platyrhynchos]
ENSAPLG00020017167	1.465	9.608	2.71334	5.41241e-06	5.97422e-05	TGFA	XP_032060079.1 protransforming growth factor alpha [Aythya fuligula]
ENSAPLG00020012280	0.381667	2.56567	2.74895	5.42698e-06	5.98584e-05	Tinagl1	XP_032058375.1 tubulointerstitial nephritis antigen-like [Aythya fuligula]
ENSAPLG00020001330	2.66867	55.0797	4.36733	5.45297e-06	6.01004e-05	IGF2BP3	XP_002192437.2 insulin-like growth factor 2 mRNA-binding protein 3 [Taeniopygia guttata]
MSTRG.13307	0.555667	4.301	2.95238	5.54383e-06	6.10563e-05	--	XP_032040349.1 taxid=219594 signal transducer CD24 [Aythya fuligula]
ENSAPLG00020008162	0.061	1.193	4.28964	5.68038e-06	6.24673e-05	Rusc2	XP_038025727.1 iporin isoform X2 [Anas platyrhynchos]
ENSAPLG00020000550	8.979	22.065	1.29713	5.84326e-06	6.42108e-05	DAPP1	XP_027311734.2 dual adapter for phosphotyrosine and 3-phosphotyrosine and 3-phosphoinositide isoform X1 [Anas platyrhynchos]
ENSAPLG00020004828	0.336667	2.114	2.65058	5.93275e-06	6.51101e-05	Ptprq	XP_038027124.1 interleukin-31 receptor subunit alpha isoform X1 [Anas platyrhynchos]
MSTRG.13589	2.73633	0.001	-11.418	6.07125e-06	6.65039e-05	--	-
ENSAPLG00020000910	0.954667	13.382	3.80915	6.07285e-06	6.65039e-05	Sytl2	XP_038033441.1 synaptotagmin-like protein 2 isoform X4 [Anas platyrhynchos]
ENSAPLG00020012112	2.13667	12.9907	2.60404	6.07438e-06	6.65039e-05	pol	XP_014810274.1 PREDICTED: uncharacterized protein LOC106895380 [Calidris pugnax]
ENSAPLG00020010948	0.0916667	5.18067	5.8206	6.18343e-06	6.76478e-05	IFNG	NP_001297346.1 interferon gamma precursor [Anas platyrhynchos]
ENSAPLG00020012804	15.2877	50.2067	1.71551	6.22755e-06	6.80802e-05	SEMA4B	XP_038040748.1 semaphorin-4B isoform X2 [Anas platyrhynchos]
MSTRG.3052	0.059	2.56067	5.43966	6.23325e-06	6.80923e-05	ERV3-1	XP_040434474.1 taxid=148594 endogenous retrovirus group 3 member 1 Env polyprotein-like [Falco naumanni]
ENSAPLG00020017231	18.309	44.166	1.27038	6.37379e-06	6.94814e-05	NSRP1	EOA98703.1 Coiled-coil domain-containing protein 55, partial [Anas platyrhynchos]
ENSAPLG00020000463	2.44967	0.0943333	-4.69867	6.37448e-06	6.94814e-05	SLC39A12	XP_021123583.1 zinc transporter ZIP12 isoform X3 [Anas platyrhynchos]
ENSAPLG00020002707	21.7	8.31767	-1.38344	6.44424e-06	7.01901e-05	Hspb2	XP_005030929.1 heat shock protein beta-2 [Anas platyrhynchos]
MSTRG.15933	0.0293333	1.56233	5.73502	6.52614e-06	7.10299e-05	--	EOB04297.1 taxid=8839 hypothetical protein Anapl_04707 [Anas platyrhynchos]
ENSAPLG00020006847	135.219	65.7707	-1.03978	6.56694e-06	7.14215e-05	STX7	XP_032040775.1 syntaxin-7 [Aythya fuligula]
ENSAPLG00020001187	279.459	105.775	-1.40164	6.59175e-06	7.16388e-05	RCBTB1	XP_032042983.1 RCC1 and BTB domain-containing protein 1 isoform X1 [Aythya fuligula]
ENSAPLG00020016009	8.87367	19.7167	1.15181	6.65037e-06	7.21699e-05	HIVEP1	XP_038029463.1 zinc finger protein 40 isoform X2 [Anas platyrhynchos]
ENSAPLG00020009220	111.055	49.5243	-1.16507	6.7349e-06	7.30261e-05	GPCPD1	XP_005019172.1 glycerophosphocholine phosphodiesterase GPCPD1 isoform X1 [Anas platyrhynchos]
ENSAPLG00020015153	46.3637	22.1693	-1.06443	6.75028e-06	7.30934e-05	HIBCH	XP_038037975.1 3-hydroxyisobutyryl-CoA hydrolase, mitochondrial isoform X2 [Anas platyrhynchos]
ENSAPLG00020001256	37.531	88.1093	1.23121	6.77064e-06	7.32605e-05	Adgrg2	XP_012949877.3 adhesion G-protein coupled receptor G2 isoform X1 [Anas platyrhynchos]
ENSAPLG00020014983	12.2797	24.9153	1.02076	6.95969e-06	7.5251e-05	ARHGEF18	XP_038025005.1 rho guanine nucleotide exchange factor 18 isoform X1 [Anas platyrhynchos]
ENSAPLG00020005771	37.9527	98.4533	1.37524	6.97862e-06	7.53452e-05	NR13	XP_027322895.1 bcl-2-like protein 10 isoform X1 [Anas platyrhynchos]
ENSAPLG00020013922	7.79833	20.1323	1.36828	6.98143e-06	7.53452e-05	Gnal	NP_001008746.1 guanine nucleotide-binding protein G(olf) subunit alpha isoform 1 [Gallus gallus]
ENSAPLG00020007766	3.25833	25.7637	2.98313	6.98366e-06	7.53452e-05	TFPI2	XP_027328588.2 WAP four-disulfide core domain protein 3-like [Anas platyrhynchos]
ENSAPLG00020004179	67.5967	31.7443	-1.09045	7.0437e-06	7.58863e-05	TMEM175	XP_038026676.1 endosomal/lysosomal potassium channel TMEM175 [Anas platyrhynchos]
ENSAPLG00020016731	25.159	67.4813	1.42341	7.04406e-06	7.58863e-05	MLKL	XP_005009126.2 mixed lineage kinase domain-like protein [Anas platyrhynchos]
ENSAPLG00020007629	2.83233	0.001	-11.4678	7.08452e-06	7.62667e-05	WNT2B	XP_027300720.1 protein Wnt-2b [Anas platyrhynchos]
MSTRG.20577	0.031	2.06033	6.05447	7.0915e-06	7.62864e-05	--	XP_035170584.1 taxid=8884 uncharacterized protein LOC118160155 isoform X2 [Oxyura jamaicensis]
ENSAPLG00020016030	0.447667	3.83933	3.10036	7.21886e-06	7.74876e-05	RIPOR3	XP_012961166.2 RIPOR family member 3 isoform X1 [Anas platyrhynchos]
ENSAPLG00020000146	0.168	4.255	4.66263	7.30695e-06	7.83764e-05	DIPK2B	XP_032063293.1 divergent protein kinase domain 2B [Aythya fuligula]
ENSAPLG00020016398	0.0823333	8.59633	6.7061	7.359e-06	7.88776e-05	--	XP_012957717.1 tumor necrosis factor ligand superfamily member 8 [Anas platyrhynchos]
ENSAPLG00020004153	4.033	1.133	-1.83171	7.42734e-06	7.95525e-05	PCNX2	XP_038032055.1 pecanex-like protein 2 isoform X1 [Anas platyrhynchos]
ENSAPLG00020000850	4.60633	0.570333	-3.01374	7.49962e-06	8.02687e-05	Acss3	XP_027307136.2 acyl-CoA synthetase short-chain family member 3, mitochondrial isoform X1 [Anas platyrhynchos]
MSTRG.278	67.9143	31.0143	-1.13078	7.77383e-06	8.30236e-05	LRRK2	XP_038041899.1 taxid=8839 leucine-rich repeat serine/threonine-protein kinase 2 isoform X2 [Anas platyrhynchos]
ENSAPLG00020005293	13.52	4.94367	-1.45144	7.80331e-06	8.32784e-05	Hlcs	EOB06241.1 Biotin--protein ligase, partial [Anas platyrhynchos]
ENSAPLG00020008542	76.579	35.6743	-1.10206	7.83763e-06	8.35845e-05	ANGEL2	XP_027309509.2 protein angel homolog 2 isoform X1 [Anas platyrhynchos]
ENSAPLG00020008342	5.901	1.69833	-1.79684	7.95526e-06	8.47178e-05	Tesk1	XP_038026626.1 dual specificity testis-specific protein kinase 1 isoform X2 [Anas platyrhynchos]
ENSAPLG00020016083	13.059	4.30667	-1.6004	7.95534e-06	8.47178e-05	Spns3	XP_027301788.1 protein spinster homolog 3 isoform X1 [Anas platyrhynchos]
ENSAPLG00020010123	57.86	116.838	1.01387	8.03995e-06	8.55573e-05	CMIP	KFO85891.1 C-Maf-inducing protein, partial [Buceros rhinoceros silvestris]
ENSAPLG00020015582	2.48233	13.7167	2.46616	8.08351e-06	8.58658e-05	PTGFRN	XP_038040326.1 prostaglandin F2 receptor negative regulator isoform X3 [Anas platyrhynchos]
ENSAPLG00020011639	0.246	10.0713	5.35545	8.09324e-06	8.58776e-05	Cr2	XP_038024478.1 complement receptor type 1 [Anas platyrhynchos]
ENSAPLG00020015959	12.3667	3.95	-1.64653	8.10304e-06	8.592e-05	DBT	XP_009883214.1 PREDICTED: lipoamide acyltransferase component of branched-chain alpha-keto acid dehydrogenase complex, mitochondrial [Charadrius vociferus]
ENSAPLG00020015665	32.6247	14.1753	-1.20258	8.12421e-06	8.6083e-05	--	XP_032058902.1 natural cytotoxicity triggering receptor 2 [Aythya fuligula]
ENSAPLG00020009535	31.867	15.0213	-1.08505	8.2535e-06	8.73903e-05	Mccc2	XP_032061904.1 methylcrotonoyl-CoA carboxylase beta chain, mitochondrial [Aythya fuligula]
ENSAPLG00020000147	7.393	2.05033	-1.8503	8.29233e-06	8.77388e-05	Rps6ka2	XP_005019279.1 ribosomal protein S6 kinase alpha-2 isoform X2 [Anas platyrhynchos]
ENSAPLG00020003784	5.83567	0.488667	-3.57797	8.38389e-06	8.86443e-05	Dnase1l3	XP_027323185.1 deoxyribonuclease gamma [Anas platyrhynchos]
ENSAPLG00020000287	0.0303333	2.34067	6.26987	8.48579e-06	8.96576e-05	HAS2	XP_005019097.1 hyaluronan synthase 2 [Anas platyrhynchos]
ENSAPLG00020011193	0.197333	1.63133	3.04735	8.62827e-06	9.10981e-05	Ciita	AWB97041.1 class II major histocompatibility complex transactivator [Anas platyrhynchos]
ENSAPLG00020007661	23.55	9.16133	-1.3621	8.68959e-06	9.16149e-05	Dcaf10	XP_038027232.1 DDB1- and CUL4-associated factor 10 isoform X1 [Anas platyrhynchos]
MSTRG.20413	20.3433	8.22733	-1.30606	8.75829e-06	9.22735e-05	--	OWK53700.1 taxid=299123 hypothetical protein RLOC_00004447 [Lonchura striata domestica]
ENSAPLG00020006620	31.3413	66.8787	1.09348	9.02232e-06	9.49202e-05	EFNB2	XP_032054898.1 ephrin-B2 isoform X1 [Aythya fuligula]
ENSAPLG00020015431	4.707	15.5773	1.72657	9.06376e-06	9.52885e-05	Trim54	XP_032040436.1 LOW QUALITY PROTEIN: tripartite motif-containing protein 54 [Aythya fuligula]
ENSAPLG00020001344	33.091	12.5357	-1.4004	9.07151e-06	9.53023e-05	MALSU1	XP_032036543.1 mitochondrial assembly of ribosomal large subunit protein 1, partial [Aythya fuligula]
ENSAPLG00020017290	17.315	54.922	1.66536	9.14967e-06	9.59873e-05	--	XP_038040203.1 type-1 angiotensin II receptor-like [Anas platyrhynchos]
ENSAPLG00020012046	13.726	4.76933	-1.52505	9.38878e-06	9.83565e-05	Dclk3	XP_027307340.1 serine/threonine-protein kinase DCLK3 isoform X3 [Anas platyrhynchos]
MSTRG.21055	0.001	1.81467	10.8255	9.41364e-06	9.85471e-05	--	KAI6058077.1 taxid=8832 Complement C1q tumor necrosis factor-related protein 3 isoform X1 [Aix galericulata]
ENSAPLG00020002112	0.094	6.599	6.13344	9.60787e-06	0.000100509	ZFAND5	XP_027304088.1 AN1-type zinc finger protein 5 isoform X2 [Anas platyrhynchos]
ENSAPLG00020015818	83.409	27.6553	-1.59265	9.64499e-06	0.00010077	Cadm1	XP_032057725.1 cell adhesion molecule 1 isoform X1 [Aythya fuligula]
ENSAPLG00020013833	62.385	134.539	1.10875	9.64641e-06	0.00010077	PTPN2	XP_027307887.2 tyrosine-protein phosphatase non-receptor type 2 isoform X3 [Anas platyrhynchos]
ENSAPLG00020004090	48.5783	19.8123	-1.29391	9.77016e-06	0.000101991	Gmip	XP_040398406.1 GEM-interacting protein isoform X4 [Cygnus olor]
ENSAPLG00020013768	73.273	31.954	-1.19729	9.81409e-06	0.000102378	Pctp	XP_027327224.2 phosphatidylcholine transfer protein isoform X1 [Anas platyrhynchos]
MSTRG.5891	0.0766667	1.973	4.68565	9.8438e-06	0.000102615	--	-
ENSAPLG00020005597	0.0293333	2.25367	6.26359	9.85976e-06	0.000102696	Kcnj15	XP_040433453.1 ATP-sensitive inward rectifier potassium channel 15 isoform X1 [Cygnus olor]
ENSAPLG00020009895	33.1187	12.1293	-1.44914	9.86546e-06	0.000102696	CETN3	XP_012953192.2 centrin-3 isoform X1 [Anas platyrhynchos]
MSTRG.15865	10.9467	4.93033	-1.15073	1.00567e-05	0.00010454	--	-
ENSAPLG00020007867	2.577	7.44	1.52961	1.02321e-05	0.000106214	MAGI3	XP_038024480.1 membrane-associated guanylate kinase, WW and PDZ domain-containing protein 3 isoform X1 [Anas platyrhynchos]
ENSAPLG00020012064	16.7733	42.0967	1.32754	1.0325e-05	0.000107104	SIRT5	XP_021130886.2 NAD-dependent protein deacylase sirtuin-5, mitochondrial [Anas platyrhynchos]
ENSAPLG00020000352	0.001	2.06533	11.0122	1.03878e-05	0.00010768	Serpinb5	XP_032037925.1 serpin B5 [Aythya fuligula]
MSTRG.6671	3.23	0.669333	-2.27074	1.0545e-05	0.000109157	--	EOA97828.1 taxid=8839 hypothetical protein Anapl_12217 [Anas platyrhynchos]
ENSAPLG00020008528	269.307	109.494	-1.2984	1.06445e-05	0.000110109	--	XP_005018601.2 immunoglobulin superfamily member 6 isoform X2 [Anas platyrhynchos]
ENSAPLG00020014528	0.001	1.78767	10.8039	1.07804e-05	0.000111359	CTIF	XP_038025381.1 CBP80/20-dependent translation initiation factor isoform X1 [Anas platyrhynchos]
ENSAPLG00020014796	0.179667	3.608	4.3278	1.08604e-05	0.000112108	NKAIN3	XP_035173830.1 sodium/potassium-transporting ATPase subunit beta-1-interacting protein 3 isoform X1 [Oxyura jamaicensis]
MSTRG.9241	6.97467	1.06267	-2.71444	1.08875e-05	0.000112264	--	-
ENSAPLG00020014597	212.198	87.141	-1.28399	1.08907e-05	0.000112264	ATP6V0A1	XP_027301089.1 V-type proton ATPase 116 kDa subunit a1 isoform X3 [Anas platyrhynchos]
MSTRG.3619	67.768	27.9547	-1.27752	1.09348e-05	0.000112641	TMA7	XP_065498371.1 taxid=187106 translation machinery-associated protein 7 [Caloenas nicobarica]
MSTRG.9157	5.95667	15.7707	1.40467	1.10186e-05	0.000113425	FYCO1	NXT33224.1 taxid=37079 FYCO1 protein [Pelecanoides urinatrix]
ENSAPLG00020003904	55.73	22.069	-1.33643	1.11123e-05	0.00011431	SLC16A6	XP_032055357.1 monocarboxylate transporter 7 [Aythya fuligula]
ENSAPLG00020004740	10.77	40.8063	1.92177	1.12165e-05	0.000115302	Dnajb9	XP_032053052.1 dnaJ homolog subfamily B member 9 [Aythya fuligula]
ENSAPLG00020015087	9.99033	1.50867	-2.72726	1.13503e-05	0.000116597	ERICH6	XP_012958959.3 LOW QUALITY PROTEIN: glutamate-rich protein 6 [Anas platyrhynchos]
ENSAPLG00020011449	3.56067	0.448	-2.99058	1.13792e-05	0.000116813	CR2	EOB07040.1 Complement component receptor 1-like protein, partial [Anas platyrhynchos]
ENSAPLG00020007560	18.148	7.352	-1.3036	1.15044e-05	0.000118016	retsat	XP_027299252.2 all-trans-retinol 13,14-reductase [Anas platyrhynchos]
ENSAPLG00020014269	13.8127	31.5787	1.19296	1.15875e-05	0.000118704	ARRDC4	XP_032050894.1 arrestin domain-containing protein 4 [Aythya fuligula]
ENSAPLG00020007768	38.7897	91.1637	1.23279	1.16454e-05	0.000119215	TOR1B	XP_027326992.2 torsin-1B [Anas platyrhynchos]
ENSAPLG00020003347	8.50467	23.297	1.45382	1.1708e-05	0.000119772	Arhgap39	XP_038022376.1 rho GTPase-activating protein 39-like isoform X1 [Anas platyrhynchos]
ENSAPLG00020000222	0.670667	7.395	3.46288	1.18187e-05	0.000120739	SHROOM2	XP_027303382.2 LOW QUALITY PROTEIN: protein Shroom2 [Anas platyrhynchos]
ENSAPLG00020014643	79.0587	39.2467	-1.01035	1.20216e-05	0.000122557	TMX2	XP_038036603.1 thioredoxin-related transmembrane protein 2 [Anas platyrhynchos]
ENSAPLG00020000420	0.455	9.72067	4.41712	1.22655e-05	0.000124958	ARHGEF5	XP_027305735.2 rho guanine nucleotide exchange factor 5 [Anas platyrhynchos]
ENSAPLG00020005866	15.3173	33.315	1.12101	1.2336e-05	0.00012559	DUSP16	XP_027310592.1 dual specificity protein phosphatase 16 [Anas platyrhynchos]
ENSAPLG00020015327	41.6687	89.1103	1.09663	1.2382e-05	0.000125971	Pde4dip	XP_038038880.1 myomegalin isoform X9 [Anas platyrhynchos]
ENSAPLG00020014922	0.001	1.011	9.98157	1.2559e-05	0.000127685	PDE4D	XP_027328178.2 cAMP-specific 3',5'-cyclic phosphodiesterase 4C isoform X2 [Anas platyrhynchos]
ENSAPLG00020002462	11.4343	28.4723	1.31619	1.25974e-05	0.000127988	DENND5B	XP_027326016.1 DENN domain-containing protein 5B isoform X6 [Anas platyrhynchos]
ENSAPLG00020005809	45.4947	108.292	1.25115	1.26579e-05	0.000128514	Ranbp2	XP_032044246.1 ranBP2-like and GRIP domain-containing protein 3 [Aythya fuligula]
MSTRG.12574	4.33233	1.265	-1.77601	1.27262e-05	0.000129118	--	XP_047933539.1 taxid=8845 uncharacterized protein LOC125184486 [Anser cygnoides]
ENSAPLG00020015925	260.049	533.632	1.03706	1.27542e-05	0.000129314	SAMHD1	XP_027328695.2 deoxynucleoside triphosphate triphosphohydrolase SAMHD1 isoform X1 [Anas platyrhynchos]
ENSAPLG00020010338	2.45267	0.0616667	-5.31372	1.27824e-05	0.000129512	PCSK2	XP_038032851.1 neuroendocrine convertase 2 [Anas platyrhynchos]
MSTRG.9535	0.001	1.589	10.6339	1.28279e-05	0.000129884	--	XP_065430583.1 taxid=8478 LOW QUALITY PROTEIN: HAUS augmin-like complex subunit 5 [Chrysemys picta bellii]
ENSAPLG00020015296	2.47533	16.7997	2.76274	1.28991e-05	0.000130515	GBP3	XP_035428453.1 guanylate-binding protein 1-like isoform X3 [Cygnus atratus]
ENSAPLG00020008810	0.113	1.794	3.98879	1.29827e-05	0.000131272	HID1	XP_032055406.1 protein HID1 [Aythya fuligula]
ENSAPLG00020000201	11.432	1.83333	-2.64054	1.32431e-05	0.000133813	MRC1	XP_027306474.2 macrophage mannose receptor 1 isoform X1 [Anas platyrhynchos]
ENSAPLG00020003052	13.2627	5.581	-1.24878	1.3296e-05	0.000134195	PGM2L1	XP_027321946.2 LOW QUALITY PROTEIN: glucose 1,6-bisphosphate synthase [Anas platyrhynchos]
ENSAPLG00020001906	7.79767	2.601	-1.58398	1.34035e-05	0.000135065	PKP2	XP_027311007.2 plakophilin-2, partial [Anas platyrhynchos]
MSTRG.15277	4.01933	20.7937	2.37112	1.34607e-05	0.000135491	pol	KAK4806153.1 taxid=33587 hypothetical protein QYF61_001076 [Mycteria americana]
ENSAPLG00020009002	92.7317	41.5353	-1.15872	1.3464e-05	0.000135491	GABARAPL2	KAG6940813.1 GABA type A receptor associated protein like 2, partial [Chelydra serpentina]
ENSAPLG00020012973	0.210333	3.52167	4.06551	1.35057e-05	0.000135818	--	XP_012951337.3 platelet glycoprotein Ib alpha chain isoform X1 [Anas platyrhynchos]
ENSAPLG00020014190	10.37	25.8407	1.31723	1.35664e-05	0.000136244	TNFSF11	XP_027328069.1 tumor necrosis factor ligand superfamily member 11 [Anas platyrhynchos]
ENSAPLG00020013805	0.194333	2.71333	3.80346	1.35798e-05	0.000136286	ST18	XP_027307892.2 suppression of tumorigenicity 18 protein [Anas platyrhynchos]
MSTRG.76	0.0106667	2.66133	7.9629	1.37945e-05	0.000138347	--	EOB08714.1 taxid=8839 hypothetical protein Anapl_10451 [Anas platyrhynchos]
ENSAPLG00020004239	45.74	20.116	-1.18511	1.3937e-05	0.000139587	MAP3K21	XP_035415026.1 mitogen-activated protein kinase kinase kinase 21 [Cygnus atratus]
ENSAPLG00020014407	0.171667	16.9347	6.62423	1.39635e-05	0.000139757	ITGB3	XP_038024757.1 LOW QUALITY PROTEIN: integrin beta-3 [Anas platyrhynchos]
ENSAPLG00020015931	0.156333	12.7473	6.34943	1.39973e-05	0.000140001	F2RL3	XP_012963621.3 proteinase-activated receptor 4 [Anas platyrhynchos]
ENSAPLG00020008633	0.591	4.702	2.99204	1.41954e-05	0.000141791	COL9A3	KFP89796.1 Collagen alpha-3(IX) chain, partial [Apaloderma vittatum]
ENSAPLG00020012175	12.1877	26.667	1.12963	1.41954e-05	0.000141791	Calu	XP_030335778.1 calumenin isoform X1 [Strigops habroptila]
ENSAPLG00020015938	0.0876667	2.04433	4.54346	1.42603e-05	0.000142343	Ccr4	XP_021124531.1 C-C chemokine receptor type 4 isoform X1 [Anas platyrhynchos]
MSTRG.5640	0.211	2.35367	3.4796	1.42865e-05	0.000142509	--	-
ENSAPLG00020013401	19.1723	7.87067	-1.28447	1.43649e-05	0.000143194	CCDC15	XP_027300035.2 coiled-coil domain-containing protein 15 [Anas platyrhynchos]
ENSAPLG00020014507	0.001	4.24467	12.0514	1.4456e-05	0.000144005	PIAS2	EOA94375.1 E3 SUMO-protein ligase PIAS2 [Anas platyrhynchos]
ENSAPLG00020014141	86.557	42.261	-1.03432	1.45176e-05	0.000144425	CARD9	XP_038020900.1 caspase recruitment domain-containing protein 9 isoform X2 [Anas platyrhynchos]
ENSAPLG00020011893	2.38367	0.426667	-2.482	1.4551e-05	0.000144661	RIMBP2	XP_021127031.1 RIMS-binding protein 2 isoform X2 [Anas platyrhynchos]
ENSAPLG00020009088	0.001	2.51733	11.2977	1.4705e-05	0.000146093	Gcnt1	XP_035414439.1 beta-1,3-galactosyl-O-glycosyl-glycoprotein beta-1,6-N-acetylglucosaminyltransferase [Cygnus atratus]
MSTRG.12992	0.001	3.173	11.6316	1.47397e-05	0.000146339	--	-
ENSAPLG00020014702	0.001	1.25333	10.2916	1.47999e-05	0.000146839	PEAR1	XP_032060189.1 LOW QUALITY PROTEIN: platelet endothelial aggregation receptor 1 [Aythya fuligula]
ENSAPLG00020007585	44.7123	22.2967	-1.00384	1.4838e-05	0.000147119	NOP2	XP_032063853.1 probable 28S rRNA (cytosine(4447)-C(5))-methyltransferase [Aythya fuligula]
ENSAPLG00020009896	23.8593	9.05133	-1.39835	1.48818e-05	0.000147455	AGA	XP_027312202.1 N(4)-(beta-N-acetylglucosaminyl)-L-asparaginase isoform X1 [Anas platyrhynchos]
ENSAPLG00020007083	20.1793	6.862	-1.55618	1.49519e-05	0.00014805	IPMK	XP_027315872.1 LOW QUALITY PROTEIN: inositol polyphosphate multikinase [Anas platyrhynchos]
ENSAPLG00020018057	168.94	401.379	1.24845	1.49951e-05	0.000148379	TXNRD1	EOA94920.1 Thioredoxin reductase 1, cytoplasmic, partial [Anas platyrhynchos]
ENSAPLG00020011936	35.209	82.4133	1.22693	1.50679e-05	0.000148822	Cebpd	XP_038031091.1 CCAAT/enhancer-binding protein delta [Anas platyrhynchos]
ENSAPLG00020003596	0.419667	5.05667	3.59087	1.507e-05	0.000148822	TESPA1	XP_038028496.1 protein TESPA1 isoform X2 [Anas platyrhynchos]
ENSAPLG00020004038	0.419667	3.865	3.20315	1.52374e-05	0.000150374	GFI1B	XP_005013314.2 zinc finger protein Gfi-1b [Anas platyrhynchos]
ENSAPLG00020015635	0.001	1.21867	10.2511	1.5251e-05	0.000150408	CHL1	XP_038041918.1 neural cell adhesion molecule L1-like protein isoform X2 [Anas platyrhynchos]
ENSAPLG00020012294	61.2637	154.73	1.33665	1.56127e-05	0.000153873	tacc3	XP_027311497.2 transforming acidic coiled-coil-containing protein 3 isoform X1 [Anas platyrhynchos]
ENSAPLG00020010004	0.194	6.11333	4.97783	1.56457e-05	0.000154095	HBB	XP_035186908.1 hemoglobin subunit epsilon isoform X1 [Oxyura jamaicensis]
ENSAPLG00020000116	40.0597	92.3257	1.20458	1.57904e-05	0.000155417	HMGB2	XP_027312211.2 high mobility group protein B2 [Anas platyrhynchos]
MSTRG.17913	6.073	2.152	-1.49673	1.59373e-05	0.000156759	--	-
ENSAPLG00020003358	41.2563	16.004	-1.36618	1.59903e-05	0.000157176	Blvrb	XP_038027992.1 flavin reductase (NADPH) [Anas platyrhynchos]
ENSAPLG00020010818	0.167667	3.50167	4.38437	1.60066e-05	0.000157232	--	PKU41653.1 rna-directed dna polymerase from mobile element jockey-like [Limosa lapponica baueri]
ENSAPLG00020008208	0.0923333	9.22267	6.64219	1.60492e-05	0.000157442	Unc13a	XP_042650550.1 protein unc-13 homolog A isoform X13 [Tyto alba]
ENSAPLG00020013807	72.1007	24.5903	-1.55192	1.62095e-05	0.000158804	ttyh3	XP_032053458.1 protein tweety homolog 3 isoform X1 [Aythya fuligula]
ENSAPLG00020005315	18.0653	44.077	1.2868	1.64669e-05	0.000161219	PTGS2	XP_032048204.1 prostaglandin G/H synthase 2 [Aythya fuligula]
ENSAPLG00020010357	89.4097	35.943	-1.31472	1.66976e-05	0.000163272	GLRX	XP_027302747.1 glutaredoxin-1 [Anas platyrhynchos]
ENSAPLG00020000210	0.586	6.90033	3.55769	1.69388e-05	0.000165402	SHROOM2	XP_035398179.1 protein Shroom2 [Cygnus atratus]
ENSAPLG00020017283	14.2303	47.6397	1.74319	1.71631e-05	0.000167371	GPR174	XP_038040303.1 probable G-protein coupled receptor 174 [Anas platyrhynchos]
ENSAPLG00020016972	181.525	62.1067	-1.54735	1.7452e-05	0.000169965	SYNGR3	XP_027324653.1 synaptogyrin-3 isoform X2 [Anas platyrhynchos]
ENSAPLG00020015545	5.884	14.3363	1.28481	1.75476e-05	0.000170783	POU2F1	XP_040423269.1 POU domain, class 2, transcription factor 1 isoform X4 [Cygnus olor]
ENSAPLG00020010784	14.662	41.1163	1.48763	1.76124e-05	0.000171301	AGO3	XP_005142594.1 protein argonaute-3 [Melopsittacus undulatus]
ENSAPLG00020017454	6.307	1.711	-1.88211	1.8021e-05	0.000175046	EFCAB7	XP_005022944.3 EF-hand calcium-binding domain-containing protein 7 [Anas platyrhynchos]
ENSAPLG00020014998	35.919	87.849	1.29028	1.80931e-05	0.000175632	DOT1L	XP_027327968.1 histone-lysine N-methyltransferase, H3 lysine-79 specific isoform X5 [Anas platyrhynchos]
MSTRG.12416	15.258	32.2117	1.07802	1.81907e-05	0.000176463	ARHGEF18	EOA94631.1 taxid=8839 Rho guanine nucleotide exchange factor 18, partial [Anas platyrhynchos]
ENSAPLG00020004150	7.753	21.9543	1.50168	1.83039e-05	0.000177445	C6orf89	XP_040392158.1 bombesin receptor-activated protein C6orf89 homolog isoform X1 [Cygnus olor]
ENSAPLG00020005140	0.0753333	0.665667	3.14344	1.83822e-05	0.000178087	ANK2	EOB01978.1 Ankyrin-2, partial [Anas platyrhynchos]
ENSAPLG00020015105	46.9767	134.688	1.51961	1.88094e-05	0.000181988	TMEM52	XP_027299091.2 transmembrane protein 52 [Anas platyrhynchos]
MSTRG.2267	0.001	1.14833	10.1653	1.88531e-05	0.000182292	--	-
ENSAPLG00020013151	4.41833	0.279667	-3.98172	1.88766e-05	0.000182399	tmem45b	XP_038023592.1 transmembrane protein 45B [Anas platyrhynchos]
ENSAPLG00020005808	0.232667	5.40933	4.53911	1.89019e-05	0.000182487	Ighm	CAC43281.1 immunoglobulin mu heavy chain, partial [Anas platyrhynchos]
MSTRG.19447	1.38	8.65233	2.64842	1.89103e-05	0.000182487	--	EOB01570.1 taxid=8839 hypothetical protein Anapl_05622 [Anas platyrhynchos]
ENSAPLG00020003718	19.843	6.87167	-1.5299	1.89734e-05	0.000182977	--	XP_014810274.1 PREDICTED: uncharacterized protein LOC106895380 [Calidris pugnax]
ENSAPLG00020017661	57.3713	26.5567	-1.11126	1.9243e-05	0.000185336	SPTSSA	KAG0120762.1 hypothetical protein IHE44_011929 [Lamprotornis superbus]
MSTRG.19665	0.638667	6.38233	3.32095	1.97082e-05	0.000189324	--	-
ENSAPLG00020009386	7.82033	20.4843	1.38922	1.99087e-05	0.000191126	Idnk	XP_038026403.1 probable gluconokinase [Anas platyrhynchos]
ENSAPLG00020011516	0.001	3.17467	11.6324	1.99806e-05	0.000191692	--	XP_035425616.1 palmitoyltransferase ZDHHC21 isoform X1 [Cygnus atratus]
ENSAPLG00020011482	33.9153	13.1437	-1.36757	2.00603e-05	0.000192332	RETREG1	XP_027307435.2 reticulophagy regulator 1 isoform X2 [Anas platyrhynchos]
ENSAPLG00020000862	39.1953	87.0897	1.15182	2.01032e-05	0.000192618	RUBCNL	XP_005024861.3 protein associated with UVRAG as autophagy enhancer isoform X2 [Anas platyrhynchos]
MSTRG.20568	16.9923	46.4093	1.44953	2.01699e-05	0.000193009	--	XP_032056870.1 taxid=219594 C-type lectin domain family 4 member D-like [Aythya fuligula]
ENSAPLG00020013917	22.907	67.3713	1.55635	2.03077e-05	0.000194201	CYP2C19	XP_027315867.1 cytochrome P450 2C9 [Anas platyrhynchos]
ENSAPLG00020017749	32.2387	78.911	1.29143	2.03464e-05	0.000194446	Tlnrd1	XP_027322521.1 talin rod domain-containing protein 1 [Anas platyrhynchos]
ENSAPLG00020010654	1.76767	0.0713333	-4.63113	2.06954e-05	0.000197272	Raly	XP_013044694.1 PREDICTED: RNA-binding protein Raly [Anser cygnoides domesticus]
ENSAPLG00020000786	1.96433	7.60867	1.9536	2.09438e-05	0.000199512	Ubash3a	EOA93670.1 Ubiquitin associated and SH3 domain-containing protein A, partial [Anas platyrhynchos]
ENSAPLG00020001974	0.278667	3.93	3.81792	2.11097e-05	0.000200963	PACSIN3	XP_027315168.1 protein kinase C and casein kinase substrate in neurons protein 3 isoform X1 [Anas platyrhynchos]
ENSAPLG00020017217	9.40933	0.896667	-3.39145	2.13422e-05	0.000203046	trarg1	XP_027327979.1 trafficking regulator of GLUT4 1 isoform X1 [Anas platyrhynchos]
ENSAPLG00020011915	43.827	21.0783	-1.05606	2.15318e-05	0.000204678	--	XP_032039060.1 zinc finger protein 585A-like [Aythya fuligula]
ENSAPLG00020002577	18.3507	8.90667	-1.04287	2.15414e-05	0.000204678	Champ1	XP_032063968.1 chromosome alignment-maintaining phosphoprotein 1 isoform X2 [Aythya fuligula]
ENSAPLG00020014595	0.001	0.673	9.39446	2.15661e-05	0.000204781	RICTOR	XP_038025347.1 rapamycin-insensitive companion of mTOR-like isoform X1 [Anas platyrhynchos]
ENSAPLG00020000749	42.8417	90.9597	1.08621	2.16475e-05	0.000205422	USP25	XP_027305079.1 ubiquitin carboxyl-terminal hydrolase 25 isoform X1 [Anas platyrhynchos]
ENSAPLG00020007394	19.9957	9.70733	-1.04254	2.21721e-05	0.000210266	BCAS3	XP_013053486.1 PREDICTED: breast carcinoma-amplified sequence 3 isoform X2 [Anser cygnoides domesticus]
ENSAPLG00020001207	2.44	9.00433	1.88374	2.28496e-05	0.000216413	ENPP2	XP_035173556.1 ectonucleotide pyrophosphatase/phosphodiesterase family member 2 isoform X2 [Oxyura jamaicensis]
ENSAPLG00020006239	11.04	22.4117	1.02151	2.30567e-05	0.000218236	KANSL1L	XP_038037767.1 KAT8 regulatory NSL complex subunit 1-like protein isoform X3 [Anas platyrhynchos]
ENSAPLG00020017074	16.1253	3.175	-2.3445	2.32426e-05	0.000219715	h2ax	XP_038023614.1 histone H2A [Anas platyrhynchos]
ENSAPLG00020001222	28.5007	58.644	1.04099	2.33047e-05	0.000220161	RMDN3	XP_032043611.1 regulator of microtubule dynamics protein 3 [Aythya fuligula]
ENSAPLG00020006873	35.534	15.8857	-1.16147	2.33732e-05	0.000220668	WFS1	XP_032042131.1 wolframin [Aythya fuligula]
ENSAPLG00020014708	0.001	1.835	10.8416	2.34321e-05	0.000221082	NTRK1	XP_032060533.1 high affinity nerve growth factor receptor [Aythya fuligula]
ENSAPLG00020010882	64.5807	31.2083	-1.04917	2.38173e-05	0.000224431	CSF3R	XP_038023234.1 LOW QUALITY PROTEIN: granulocyte colony-stimulating factor receptor [Anas platyrhynchos]
ENSAPLG00020001773	6.76267	16.357	1.27424	2.41089e-05	0.000227035	Dennd3	XP_032038471.1 DENN domain-containing protein 3 isoform X1 [Aythya fuligula]
ENSAPLG00020003906	0.264333	2.344	3.14854	2.4275e-05	0.000228318	FUT10	XP_005019061.2 alpha-(1,3)-fucosyltransferase 10 [Anas platyrhynchos]
ENSAPLG00020010776	21.5483	8.36433	-1.36525	2.42761e-05	0.000228318	NCAPD3	XP_027299947.2 condensin-2 complex subunit D3 [Anas platyrhynchos]
MSTRG.8376	6.78633	1.68333	-2.01131	2.43661e-05	0.00022902	--	-
ENSAPLG00020002317	96.7563	194.206	1.00516	2.44655e-05	0.000229808	Rnf128	XP_027320964.2 E3 ubiquitin-protein ligase RNF128 isoform X1 [Anas platyrhynchos]
ENSAPLG00020007121	0.029	2.16167	6.21995	2.45478e-05	0.000230435	GSC	XP_027314932.1 homeobox protein goosecoid isoform X1 [Anas platyrhynchos]
MSTRG.3421	185.037	61.831	-1.58141	2.47224e-05	0.000231927	Stab1	XP_027323086.1 taxid=8839 stabilin-1 isoform X1 [Anas platyrhynchos]
ENSAPLG00020009361	16.1427	155.415	3.26717	2.48332e-05	0.000232819	MYO1C	XP_027327907.1 unconventional myosin-Ic isoform X1 [Anas platyrhynchos]
ENSAPLG00020004900	13046.2	5838.84	-1.15988	2.50184e-05	0.000234259	PSAP	XP_027316348.1 prosaposin isoform X3 [Anas platyrhynchos]
ENSAPLG00020003743	10.8213	2.202	-2.29699	2.5213e-05	0.000235932	MADPRT	XP_027321147.2 erythroblast NAD(P)(+)--arginine ADP-ribosyltransferase-like isoform X2 [Anas platyrhynchos]
ENSAPLG00020000583	14.407	42.6287	1.56505	2.54485e-05	0.000237985	DEPTOR	XP_013040484.1 PREDICTED: DEP domain-containing mTOR-interacting protein [Anser cygnoides domesticus]
ENSAPLG00020000381	0.335	6.09867	4.18626	2.58032e-05	0.000240998	--	XP_027305736.2 zinc finger protein 239 [Anas platyrhynchos]
ENSAPLG00020003932	0.0653333	5.30067	6.34221	2.58309e-05	0.000241105	GRTP1	XP_027300273.1 growth hormone-regulated TBC protein 1 [Anas platyrhynchos]
ENSAPLG00020005224	16.7333	45.8133	1.45304	2.59288e-05	0.000241866	CHAF1B	XP_012948775.2 chromatin assembly factor 1 subunit B [Anas platyrhynchos]
MSTRG.8589	0.103667	2.80633	4.75866	2.61891e-05	0.000244141	--	-
MSTRG.3512	208.828	441.103	1.0788	2.67023e-05	0.000248768	FLNB	XP_027323164.1 taxid=8839 filamin-B isoform X3 [Anas platyrhynchos]
ENSAPLG00020000630	614.727	276.936	-1.15039	2.69457e-05	0.00025072	PRCP	XP_005026125.3 lysosomal Pro-X carboxypeptidase [Anas platyrhynchos]
MSTRG.2110	1.13233	5.044	2.15527	2.70286e-05	0.000251334	--	-
ENSAPLG00020006821	30.8903	13.123	-1.23506	2.71481e-05	0.000252287	A4GALT	XP_027305840.1 lactosylceramide 4-alpha-galactosyltransferase [Anas platyrhynchos]
ENSAPLG00020014352	0.001	0.691333	9.43324	2.7278e-05	0.000253335	RET	XP_027316096.1 proto-oncogene tyrosine-protein kinase receptor Ret isoform X1 [Anas platyrhynchos]
MSTRG.18314	3.99433	10.5437	1.40035	2.74361e-05	0.000254644	--	XP_005017569.3 taxid=8839 tip elongation aberrant protein 3 isoform X1 [Anas platyrhynchos]
ENSAPLG00020001581	2.149	11.2957	2.39403	2.75207e-05	0.000255269	ZP1	XP_038036074.1 LOW QUALITY PROTEIN: zona pellucida sperm-binding protein 1 [Anas platyrhynchos]
ENSAPLG00020011414	2.87633	9.18133	1.67447	2.75662e-05	0.00025553	RNF157	XP_032055603.1 LOW QUALITY PROTEIN: E3 ubiquitin ligase RNF157 [Aythya fuligula]
ENSAPLG00020007285	0.749333	5.60633	2.90338	2.77315e-05	0.000256902	CD226	XP_021122680.1 CD226 antigen isoform X1 [Anas platyrhynchos]
MSTRG.13138	0.085	2.373	4.80311	2.83028e-05	0.000261731	--	-
ENSAPLG00020004885	0.373667	2.03667	2.44639	2.83058e-05	0.000261731	GLI3	XP_005015002.1 transcriptional activator GLI3 isoform X1 [Anas platyrhynchos]
ENSAPLG00020011802	20.1867	8.94633	-1.17403	2.83728e-05	0.000262187	AACS	XP_027325697.1 acetoacetyl-CoA synthetase isoform X1 [Anas platyrhynchos]
ENSAPLG00020012404	0.833667	5.25567	2.65633	2.8513e-05	0.000263154	ENC1	XP_005029143.1 ectoderm-neural cortex protein 1-like [Anas platyrhynchos]
ENSAPLG00020012399	29.235	12.075	-1.27567	2.875e-05	0.000264847	NR4A2	XP_035188095.1 nuclear receptor subfamily 4 group A member 2 isoform X3 [Oxyura jamaicensis]
ENSAPLG00020001747	0.001	1.61167	10.6543	2.88595e-05	0.00026569	Gpr20	XP_027308559.1 G-protein coupled receptor 20 isoform X1 [Anas platyrhynchos]
ENSAPLG00020011382	0.001	1.99833	10.9646	2.9097e-05	0.000267544	snai1	XP_027328745.1 zinc finger protein SNAI1 [Anas platyrhynchos]
ENSAPLG00020010832	0.88	5.64733	2.68199	2.93435e-05	0.000269476	--	-
ENSAPLG00020000069	11.596	38.6433	1.73659	3.03424e-05	0.000278477	PRKCQ	XP_038043841.1 protein kinase C theta type [Anas platyrhynchos]
ENSAPLG00020009679	9.14067	2.542	-1.84634	3.06317e-05	0.000280784	BCKDHB	XP_038033103.1 2-oxoisovalerate dehydrogenase subunit beta, mitochondrial isoform X2 [Anas platyrhynchos]
ENSAPLG00020007183	18.3787	53.1347	1.53162	3.07624e-05	0.000281808	Pdgfb	XP_027306635.2 platelet-derived growth factor subunit B [Anas platyrhynchos]
of RNA biosynthetic process
ENSAPLG00020004204	57.189	23.622	-1.27561	3.08473e-05	0.000282311	PANX1	XP_027323298.1 pannexin-1 [Anas platyrhynchos]
ENSAPLG00020017303	32.2507	65.6587	1.02566	3.0868e-05	0.000282311	Jade2	XP_032052802.1 E3 ubiquitin-protein ligase Jade-2 isoform X1 [Aythya fuligula]
ENSAPLG00020000745	3.891	10.289	1.40289	3.09767e-05	0.000283071	SLC37A1	XP_038028794.1 glucose-6-phosphate exchanger SLC37A1 isoform X2 [Anas platyrhynchos]
ENSAPLG00020008885	38.8587	18.469	-1.07313	3.11252e-05	0.000284252	GCNT4	XP_027301873.2 beta-1,3-galactosyl-O-glycosyl-glycoprotein beta-1,6-N-acetylglucosaminyltransferase 4 [Anas platyrhynchos]
ENSAPLG00020009287	0.705333	4.29533	2.60639	3.16191e-05	0.000288585	DMRT2	XP_027302732.2 doublesex- and mab-3-related transcription factor 2 isoform X1 [Anas platyrhynchos]
ENSAPLG00020012676	8.45533	22.9507	1.4406	3.19678e-05	0.000291409	CRISPLD2	XP_005016593.1 cysteine-rich secretory protein LCCL domain-containing 2 [Anas platyrhynchos]
ENSAPLG00020002533	60.3727	122.374	1.01933	3.20221e-05	0.000291724	CLEC4D	ABK91350.1 dendritic cell immunoactivating receptor isoform 1 [Anas platyrhynchos]
ENSAPLG00020017119	8.396	2.902	-1.53265	3.23834e-05	0.000294834	TCTN3	XP_027315758.2 tectonic-3 isoform X1 [Anas platyrhynchos]
ENSAPLG00020017419	18.134	47.8657	1.40029	3.27417e-05	0.000297731	RABGAP1L	XP_021127995.1 rab GTPase-activating protein 1-like isoform X5 [Anas platyrhynchos]
ENSAPLG00020009003	15.4087	6.213	-1.31038	3.28621e-05	0.000298642	AHRR	XP_038031369.1 aryl hydrocarbon receptor repressor isoform X1 [Anas platyrhynchos]
ENSAPLG00020018246	15.5883	6.251	-1.31831	3.35218e-05	0.000304169	SNX29	XP_005018502.1 sorting nexin-29 isoform X1 [Anas platyrhynchos]
ENSAPLG00020006914	3.98233	0.786333	-2.3404	3.35319e-05	0.000304169	TMTC4	XP_027299524.1 protein O-mannosyl-transferase TMTC4 [Anas platyrhynchos]
ENSAPLG00020018055	317.834	714.335	1.16833	3.37529e-05	0.000305986	TXNRD1	XP_027305323.2 thioredoxin reductase 1, cytoplasmic isoform X2 [Anas platyrhynchos]
ENSAPLG00020009471	8.08767	26.5567	1.71528	3.42833e-05	0.000310415	PMP22	XP_032055695.1 peripheral myelin protein 22 [Aythya fuligula]
ENSAPLG00020005831	0.0696667	4.77367	6.09849	3.43308e-05	0.000310655	IGHV3-23	XP_032063102.1 immunoglobulin gamma-1 heavy chain-like [Aythya fuligula]
ENSAPLG00020017459	0.699333	5.15033	2.88061	3.45016e-05	0.00031201	RAVER2	XP_027319596.1 ribonucleoprotein PTB-binding 2 isoform X7 [Anas platyrhynchos]
ENSAPLG00020005424	10.367	32.6577	1.65542	3.46421e-05	0.000313089	BTN3A1	XP_038043755.1 butyrophilin subfamily 3 member A3-like isoform X9 [Anas platyrhynchos]
ENSAPLG00020016256	14.7137	3.53067	-2.05914	3.49567e-05	0.00031574	C15orf39	XP_027322068.2 LOW QUALITY PROTEIN: uncharacterized protein C15orf39 homolog [Anas platyrhynchos]
ENSAPLG00020006942	10.446	5.10833	-1.03203	3.49955e-05	0.000315898	Vangl1	XP_012952726.1 vang-like protein 1 isoform X2 [Anas platyrhynchos]
ENSAPLG00020008389	29.1483	62.7457	1.1061	3.52476e-05	0.00031798	Slco4c1	XP_027302614.2 solute carrier organic anion transporter family member 4C1 isoform X1 [Anas platyrhynchos]
ENSAPLG00020008114	28.4507	13.923	-1.03099	3.52892e-05	0.000318161	PDSS2	XP_032041153.1 decaprenyl-diphosphate synthase subunit 2 [Aythya fuligula]
ENSAPLG00020016189	17.5857	38.8753	1.14446	3.5383e-05	0.000318813	IRAK2	XP_027323210.1 interleukin-1 receptor-associated kinase-like 2 [Anas platyrhynchos]
ENSAPLG00020018291	0.001	5.07333	12.3087	3.57914e-05	0.000322297	IFN	XP_038025743.1 interferon-like [Anas platyrhynchos]
ENSAPLG00020014405	14.8883	6.61233	-1.17095	3.7266e-05	0.000334558	Parg	XP_027316458.2 poly(ADP-ribose) glycohydrolase isoform X1 [Anas platyrhynchos]
ENSAPLG00020004015	26.81	6.80733	-1.97761	3.74453e-05	0.000335965	SESN3	XP_032036500.1 sestrin-3 [Aythya fuligula]
ENSAPLG00020006103	16.5457	40.91	1.306	3.74815e-05	0.000336086	PHIP	XP_032039888.1 PH-interacting protein isoform X1 [Aythya fuligula]
MSTRG.13729	32.262	12.7137	-1.34346	3.7635e-05	0.000337257	--	-
ENSAPLG00020011991	7.436	2.78567	-1.4165	3.77828e-05	0.000338263	MYO1D	XP_027301021.2 unconventional myosin-Id isoform X2 [Anas platyrhynchos]
MSTRG.16543	1.078	7.69133	2.83488	3.91088e-05	0.000349408	--	XP_038027739.1 taxid=8839 coiled-coil domain-containing protein 81-like [Anas platyrhynchos]
ENSAPLG00020003923	6.749	1.52433	-2.1465	3.9268e-05	0.000350412	slc46a1	XP_027327711.2 proton-coupled folate transporter [Anas platyrhynchos]
ENSAPLG00020005253	17.1053	8.16067	-1.06769	3.92684e-05	0.000350412	MTG1	XP_027316392.2 mitochondrial ribosome-associated GTPase 1 [Anas platyrhynchos]
MSTRG.7983	0.368	2.38933	2.69883	3.92938e-05	0.000350426	--	EOB02271.1 taxid=8839 hypothetical protein Anapl_09357 [Anas platyrhynchos]
ENSAPLG00020013412	0.0896667	2.87133	5.00101	3.94833e-05	0.000351905	Esam	XP_027300095.2 LOW QUALITY PROTEIN: endothelial cell-selective adhesion molecule [Anas platyrhynchos]
ENSAPLG00020001980	49.767	24.4673	-1.02433	3.99935e-05	0.000356023	ALG5	EOB02124.1 Dolichyl-phosphate beta-glucosyltransferase, partial [Anas platyrhynchos]
ENSAPLG00020014331	17.1197	8.41533	-1.02456	4.01181e-05	0.000356919	Zmiz1	XP_032047563.1 zinc finger MIZ domain-containing protein 1 isoform X1 [Aythya fuligula]
MSTRG.15183	28.023	56.569	1.0134	4.03232e-05	0.000358528	--	EOA99424.1 taxid=8839 hypothetical protein Anapl_07161 [Anas platyrhynchos]
ENSAPLG00020017158	24.136	63.0613	1.38557	4.04751e-05	0.000359662	Plk3	XP_038039168.1 serine/threonine-protein kinase PLK3 isoform X2 [Anas platyrhynchos]
ENSAPLG00020006600	137.335	61.7187	-1.15392	4.10076e-05	0.000364176	Slc38a6	XP_038036037.1 probable sodium-coupled neutral amino acid transporter 6 [Anas platyrhynchos]
ENSAPLG00020008611	1.148	0.0456667	-4.65184	4.1607e-05	0.000368835	Pcsk5	XP_038025775.1 proprotein convertase subtilisin/kexin type 5 isoform X2 [Anas platyrhynchos]
ENSAPLG00020015308	0.607333	6.572	3.43577	4.17303e-05	0.000369708	JAML	XP_027299969.2 junctional adhesion molecule-like isoform X1 [Anas platyrhynchos]
ENSAPLG00020017623	8.03633	18.7653	1.22346	4.22009e-05	0.00037343	LRCH2	XP_027320736.1 leucine-rich repeat and calponin homology domain-containing protein 2 isoform X2 [Anas platyrhynchos]
ENSAPLG00020004871	49.148	22.8567	-1.10452	4.23401e-05	0.000374438	PYCR2	XP_027327205.1 pyrroline-5-carboxylate reductase 1, mitochondrial [Anas platyrhynchos]
ENSAPLG00020007035	10.9993	29.5727	1.42685	4.26398e-05	0.000376863	SYDE2	XP_027318595.2 rho GTPase-activating protein SYDE2 isoform X1 [Anas platyrhynchos]
ENSAPLG00020000020	0.118667	2.16733	4.19093	4.30954e-05	0.000380663	POU1F1	NP_001297294.1 pituitary-specific positive transcription factor 1 [Anas platyrhynchos]
ENSAPLG00020012658	16.826	58.094	1.7877	4.31478e-05	0.000380899	Tstd3	XP_027310598.2 LOW QUALITY PROTEIN: thiosulfate sulfurtransferase/rhodanese-like domain-containing protein 3 [Anas platyrhynchos]
MSTRG.7988	0.0413333	1.51067	5.19174	4.34206e-05	0.000383078	--	-
ENSAPLG00020013664	8.32933	17.5217	1.07287	4.39328e-05	0.000387367	Plcg1	XP_032054227.1 1-phosphatidylinositol 4,5-bisphosphate phosphodiesterase gamma-1 isoform X1 [Aythya fuligula]
ENSAPLG00020005127	35.5247	11.441	-1.63461	4.50762e-05	0.000397212	E2F8	XP_027314732.1 transcription factor E2F8 [Anas platyrhynchos]
ENSAPLG00020009561	4.933	12.5213	1.34385	4.51345e-05	0.00039749	--	XP_027313983.1 ferritin light chain [Anas platyrhynchos]
MSTRG.4171	64.49	27.9707	-1.20516	4.52144e-05	0.000397957	--	XP_038040136.1 taxid=8839 uncharacterized protein LOC119717843 isoform X2 [Anas platyrhynchos]
ENSAPLG00020012044	11.701	32.835	1.4886	4.54605e-05	0.000399885	JARID2	XP_027307055.2 protein Jumonji isoform X1 [Anas platyrhynchos]
ENSAPLG00020014536	27.042	55.839	1.04607	4.59493e-05	0.000403945	Zcchc17	XP_027299561.1 nucleolar protein of 40 kDa isoform X1 [Anas platyrhynchos]
MSTRG.7845	9.58667	4.41533	-1.11851	4.71919e-05	0.000414623	C10orf143	XP_035403488.1 taxid=8868 uncharacterized protein C10orf143 homolog isoform X3 [Cygnus atratus]
ENSAPLG00020001990	9.929	4.371	-1.18369	4.74313e-05	0.000416232	XPNPEP3	XP_027306950.1 xaa-Pro aminopeptidase 3 isoform X1 [Anas platyrhynchos]
ENSAPLG00020015679	49.59	24.2203	-1.03383	4.79867e-05	0.000420857	naxe	XP_027300315.2 NAD(P)H-hydrate epimerase [Anas platyrhynchos]
ENSAPLG00020000719	14.8597	39.3463	1.40483	4.901e-05	0.000429069	SAMSN1	XP_032054155.1 SAM domain-containing protein SAMSN-1-like isoform X2 [Aythya fuligula]
MSTRG.10198	7.05033	15.1633	1.10482	4.94138e-05	0.000432094	--	EOB04036.1 taxid=8839 hypothetical protein Anapl_04909 [Anas platyrhynchos]
ENSAPLG00020010992	1.351	0.0446667	-4.91869	4.95359e-05	0.000432906	EPHA3	XP_027305220.2 ephrin type-A receptor 3 isoform X1 [Anas platyrhynchos]
ENSAPLG00020002634	0.182333	2.008	3.46111	4.96806e-05	0.000433915	CAPRIN2	XP_038032845.1 caprin-2 isoform X5 [Anas platyrhynchos]
ENSAPLG00020005735	15.5917	5.406	-1.52814	4.98837e-05	0.000435431	Ptprn	XP_038037829.1 LOW QUALITY PROTEIN: receptor-type tyrosine-protein phosphatase-like N [Anas platyrhynchos]
ENSAPLG00020001151	2.9	8.58033	1.56498	4.99523e-05	0.000435731	cry-dash	XP_032039229.1 cryptochrome DASH-like [Aythya fuligula]
ENSAPLG00020013508	2.68133	6.48733	1.27467	4.99768e-05	0.000435731	MPRIP	XP_023792648.1 myosin phosphatase Rho-interacting protein isoform X8 [Cyanistes caeruleus]
ENSAPLG00020017193	8.83033	21.157	1.2606	5.00988e-05	0.000436537	Dach2	XP_027320720.2 dachshund homolog 2 isoform X3 [Anas platyrhynchos]
ENSAPLG00020000962	30.8353	14.8507	-1.05406	5.02259e-05	0.00043713	KLHL2	XP_032042755.1 kelch-like protein 2 isoform X1 [Aythya fuligula]
MSTRG.77	0.577667	2.955	2.35485	5.08795e-05	0.0004423	--	EOB08714.1 taxid=8839 hypothetical protein Anapl_10451 [Anas platyrhynchos]
ENSAPLG00020007589	221.282	458.509	1.05107	5.09919e-05	0.000443017	Rnf135	AID76934.1 Riplet [Anas platyrhynchos]
ENSAPLG00020001561	302.419	144.115	-1.06933	5.25589e-05	0.000456095	NHLRC3	XP_038034767.1 NHL repeat-containing protein 3 [Anas platyrhynchos]
ENSAPLG00020003769	9.376	23.392	1.31897	5.25986e-05	0.000456172	PLK2	XP_038026671.1 serine/threonine-protein kinase PLK2 [Anas platyrhynchos]
MSTRG.11800	0.0593333	3.26333	5.78136	5.41598e-05	0.000469032	Cd34	XP_027300584.2 taxid=8839 hematopoietic progenitor cell antigen CD34 isoform X2 [Anas platyrhynchos]
MSTRG.14447	3.85433	11.6423	1.59483	5.41764e-05	0.000469032	TLR1	XP_005018927.3 taxid=8839 toll-like receptor 2 [Anas platyrhynchos]
ENSAPLG00020012985	21.8293	6.79733	-1.68323	5.42232e-05	0.000469163	MTFR2	XP_038031960.1 mitochondrial fission regulator 2 isoform X2 [Anas platyrhynchos]
ENSAPLG00020018471	84.5447	37.9623	-1.15515	5.42647e-05	0.000469248	Septin9	XP_027325186.2 LOW QUALITY PROTEIN: septin-12 [Anas platyrhynchos]
ENSAPLG00020013673	4.68767	1.20833	-1.95585	5.43202e-05	0.000469454	ZHX3	XP_027298618.2 zinc fingers and homeoboxes protein 3 [Anas platyrhynchos]
ENSAPLG00020000265	1.457	36.2443	4.63668	5.46788e-05	0.000472278	SERPINB10	XP_038030020.1 LOW QUALITY PROTEIN: serpin B10-like [Anas platyrhynchos]
MSTRG.4981	3.198	0.59	-2.43838	5.55791e-05	0.000479775	--	XP_038041388.1 taxid=8839 puratrophin-1 isoform X2 [Anas platyrhynchos]
MSTRG.11908	25.7593	60.8613	1.24043	5.63488e-05	0.000486136	PPP1R15B	XP_012959390.3 taxid=8839 protein phosphatase 1 regulatory subunit 15B [Anas platyrhynchos]
ENSAPLG00020002722	0.001	0.740667	9.53268	5.63977e-05	0.000486274	CD163L1	XP_032060934.1 antigen WC1.1-like [Aythya fuligula]
ENSAPLG00020002331	0.109333	2.791	4.67398	5.66654e-05	0.000488298	--	XP_038043918.1 LOW QUALITY PROTEIN: zinc finger protein CKR1-like [Anas platyrhynchos]
ENSAPLG00020004966	615.351	277.08	-1.15111	5.69266e-05	0.000490043	FUCA2	XP_027310223.2 plasma alpha-L-fucosidase [Anas platyrhynchos]
ENSAPLG00020017779	0.138333	1.80433	3.70525	5.69341e-05	0.000490043	DGKD	XP_015133851.2 diacylglycerol kinase delta isoform X4 [Gallus gallus]
ENSAPLG00020000650	220.637	458.711	1.05591	5.7176e-05	0.00049184	NFKBIA	XP_027314416.1 NF-kappa-B inhibitor alpha [Anas platyrhynchos]
ENSAPLG00020003705	1.07267	5.405	2.33309	5.74921e-05	0.000494272	ZP1	XP_038036074.1 LOW QUALITY PROTEIN: zona pellucida sperm-binding protein 1 [Anas platyrhynchos]
MSTRG.9504	3.335	0.277	-3.58973	5.76367e-05	0.000495228	--	-
ENSAPLG00020016659	28.593	9.63633	-1.56911	5.82568e-05	0.00050011	AAGAB	XP_038041161.1 alpha- and gamma-adaptin-binding protein p34 [Anas platyrhynchos]
ENSAPLG00020000286	14.2427	30.2687	1.08761	5.82725e-05	0.00050011	MMAA	XP_038033970.1 methylmalonic aciduria type A protein, mitochondrial [Anas platyrhynchos]
ENSAPLG00020001606	0.852333	9.01567	3.40294	5.84397e-05	0.000501255	Il17f	NP_001297735.1 interleukin-17F precursor [Anas platyrhynchos]
ENSAPLG00020016433	51.611	22.553	-1.19436	5.85302e-05	0.00050174	Rcc2	XP_032057232.1 protein RCC2 [Aythya fuligula]
ENSAPLG00020015700	10.312	25.895	1.32835	5.88984e-05	0.000504605	PIM1	XP_027300530.2 LOW QUALITY PROTEIN: serine/threonine-protein kinase pim-1 [Anas platyrhynchos]
ENSAPLG00020012151	20.9217	8.604	-1.28192	5.95611e-05	0.000509398	NME6	XP_027317829.2 nucleoside diphosphate kinase 6 [Anas platyrhynchos]
ENSAPLG00020012073	0.0333333	2.17033	6.02481	5.98183e-05	0.000511303	TYMP	XP_038043965.1 thymidine phosphorylase [Anas platyrhynchos]
ENSAPLG00020005063	271.346	98.661	-1.45958	6.02493e-05	0.00051469	CDH2	XP_027307987.1 cadherin-2 [Anas platyrhynchos]
ENSAPLG00020000221	9.20567	71.2	2.95128	6.04877e-05	0.000516132	MFAP3L	XP_038034950.1 microfibrillar-associated protein 3-like isoform X1 [Anas platyrhynchos]
ENSAPLG00020010247	33.781	16.256	-1.05524	6.12785e-05	0.000522578	ARSK	XP_038026042.1 arylsulfatase K [Anas platyrhynchos]
ENSAPLG00020000100	0.890333	3.68767	2.05029	6.1646e-05	0.00052541	GVINP1	XP_038033106.1 interferon-induced very large GTPase 1-like [Anas platyrhynchos]
MSTRG.320	6.343	1.339	-2.24401	6.18642e-05	0.000526624	--	XP_050567062.1 taxid=8868 uncharacterized protein LOC118250829 [Cygnus atratus]
ENSAPLG00020013353	0.387667	2.61233	2.75245	6.18951e-05	0.000526624	pol	XP_014810274.1 PREDICTED: uncharacterized protein LOC106895380 [Calidris pugnax]
ENSAPLG00020016279	6.46167	1.88133	-1.78015	6.21391e-05	0.000528304	CPED1	XP_005013194.3 cadherin-like and PC-esterase domain-containing protein 1 isoform X1 [Anas platyrhynchos]
ENSAPLG00020016061	0.241333	3.70033	3.93856	6.21639e-05	0.000528304	SOX13	XP_027300938.2 LOW QUALITY PROTEIN: transcription factor SOX-13 [Anas platyrhynchos]
ENSAPLG00020015895	18.463	49.6483	1.42711	6.35143e-05	0.000539162	PPARGC1A	XP_005031720.1 peroxisome proliferator-activated receptor gamma coactivator 1-alpha isoform X3 [Anas platyrhynchos]
ENSAPLG00020012782	0.870667	5.896	2.75954	6.36092e-05	0.000539658	Klrd1	XP_038031016.1 uncharacterized protein LOC101792424 [Anas platyrhynchos]
ENSAPLG00020017850	0.892	5.035	2.49688	6.37977e-05	0.000540947	Ackr3	XP_027316964.1 atypical chemokine receptor 3 isoform X1 [Anas platyrhynchos]
MSTRG.15228	0.001	7.44867	12.8628	6.47614e-05	0.000548805	--	XP_038028680.1 taxid=8839 deleted in malignant brain tumors 1 protein-like isoform X3 [Anas platyrhynchos]
MSTRG.3363	3.968	9.29933	1.22872	6.53456e-05	0.000553439	V-SEA	XP_038041632.1 taxid=8839 LOW QUALITY PROTEIN: macrophage-stimulating protein receptor [Anas platyrhynchos]
ENSAPLG00020010902	5.37433	14.113	1.39287	6.68177e-05	0.00056526	CD200	XP_040424373.1 OX-2 membrane glycoprotein-like isoform X2 [Cygnus olor]
ENSAPLG00020008543	14.5563	42.2043	1.53574	6.71011e-05	0.000567334	MIF4GD	XP_027327431.1 MIF4G domain-containing protein [Anas platyrhynchos]
MSTRG.14156	0.124333	1.83067	3.88008	6.72802e-05	0.000568524	--	-
ENSAPLG00020010484	46.9747	100.898	1.10295	7.03861e-05	0.000593414	OSER1	EOB03624.1 Uncharacterized protein C20orf111, partial [Anas platyrhynchos]
ENSAPLG00020015467	5.68533	2.512	-1.17841	7.04538e-05	0.000593648	Myo5b	XP_032062327.1 unconventional myosin-Vb isoform X1 [Aythya fuligula]
ENSAPLG00020008263	141.888	59.3287	-1.25795	7.06617e-05	0.000595061	HSDL2	XP_027302378.2 hydroxysteroid dehydrogenase-like protein 2 [Anas platyrhynchos]
ENSAPLG00020012070	33.5463	70.5597	1.07269	7.08827e-05	0.000596583	SERTAD2	XP_027308773.2 SERTA domain-containing protein 2 [Anas platyrhynchos]
ENSAPLG00020005963	11.222	3.71233	-1.59593	7.11719e-05	0.000598162	CABLES1	XP_027307747.1 CDK5 and ABL1 enzyme substrate 1 isoform X1 [Anas platyrhynchos]
ENSAPLG00020017489	7.907	22.1187	1.48406	7.17635e-05	0.000602284	Mknk1	XP_005027427.2 MAP kinase-interacting serine/threonine-protein kinase 1 isoform X1 [Anas platyrhynchos]
ENSAPLG00020011728	5.758	19.2813	1.74357	7.23469e-05	0.000606494	GIMAP6	XP_038030423.1 GTPase IMAP family member 6-like [Anas platyrhynchos]
MSTRG.21714	0.001	1.932	10.9159	7.24092e-05	0.000606673	--	-
ENSAPLG00020000935	30.946	14.4063	-1.10305	7.25615e-05	0.000607605	JAM2	XP_027305066.2 junctional adhesion molecule B isoform X1 [Anas platyrhynchos]
ENSAPLG00020003740	3.43333	8.85933	1.36759	7.26837e-05	0.000608285	CCDC138	XP_038027702.1 coiled-coil domain-containing protein 138-like [Anas platyrhynchos]
ENSAPLG00020004346	47.9773	23.1463	-1.05157	7.33417e-05	0.000612752	SEC24D	XP_038034913.1 protein transport protein Sec24D-like isoform X2 [Anas platyrhynchos]
ENSAPLG00020007753	11.2113	4.14333	-1.43609	7.40109e-05	0.000617996	Kiaa0895l	XP_027322126.2 uncharacterized protein KIAA0895-like homolog [Anas platyrhynchos]
MSTRG.6467	0.027	1.623	5.90956	7.42958e-05	0.000620025	Pxdn	XP_027328729.2 taxid=8839 peroxidasin homolog isoform X1 [Anas platyrhynchos]
ENSAPLG00020012497	0.977333	6.758	2.78967	7.50345e-05	0.000625837	Ackr4	XP_005022227.2 atypical chemokine receptor 4 [Anas platyrhynchos]
ENSAPLG00020010425	2.87833	8.05967	1.48549	7.52587e-05	0.000627001	RBMS2	XP_032060689.1 RNA-binding motif, single-stranded-interacting protein 2 isoform X3 [Aythya fuligula]
ENSAPLG00020013976	0.997	3.428	1.7817	7.64952e-05	0.000636229	GPC1	XP_027319858.1 glypican-1 [Anas platyrhynchos]
MSTRG.1172	0.314333	3.07133	3.2885	7.74124e-05	0.000643496	--	-
ENSAPLG00020012055	29.7893	62.2647	1.06362	7.79886e-05	0.000647559	PELI1	XP_013050348.1 PREDICTED: E3 ubiquitin-protein ligase pellino homolog 1 isoform X1 [Anser cygnoides domesticus]
ENSAPLG00020017683	6.29833	1.372	-2.19869	7.87546e-05	0.000653187	cracr2b	XP_038036667.1 EF-hand calcium-binding domain-containing protein 4A isoform X5 [Anas platyrhynchos]
ENSAPLG00020005013	22.267	50.4167	1.17899	7.92387e-05	0.000656834	SEPTIN11	XP_039565417.1 septin-11 isoform X4 [Passer montanus]
MSTRG.9070	0.0203333	2.21767	6.76905	7.98278e-05	0.000660609	--	-
ENSAPLG00020008410	0.325667	3.067	3.23536	8.01683e-05	0.000662758	JCAD	XP_027306360.2 LOW QUALITY PROTEIN: junctional protein associated with coronary artery disease [Anas platyrhynchos]
ENSAPLG00020003506	43.69	19.009	-1.20062	8.0177e-05	0.000662758	TLCD1	XP_027328073.1 TLC domain-containing protein 1 isoform X1 [Anas platyrhynchos]
ENSAPLG00020009481	0.244	3.78867	3.95674	8.58302e-05	0.00070712	SLC16A13	EOB06087.1 Monocarboxylate transporter 2, partial [Anas platyrhynchos]
ENSAPLG00020001534	49.5847	22.8863	-1.11541	8.61252e-05	0.000709156	SLC25A15	XP_027326734.1 mitochondrial ornithine transporter 1 [Anas platyrhynchos]
ENSAPLG00020003238	12.0263	3.11467	-1.94905	8.64627e-05	0.00071154	HS3ST2	XP_005426093.1 heparan sulfate glucosamine 3-O-sulfotransferase 2 [Geospiza fortis]
ENSAPLG00020003585	21.259	8.58	-1.30902	8.75939e-05	0.000720049	FKTN	XP_038026142.1 fukutin [Anas platyrhynchos]
ENSAPLG00020015778	10.8553	28.4097	1.38798	8.81068e-05	0.000723864	DEF6	XP_027300510.1 differentially expressed in FDCP 6 homolog [Anas platyrhynchos]
ENSAPLG00020016062	16.6957	39.8727	1.25593	8.94733e-05	0.000734683	TRNT1	XP_027323197.1 CCA tRNA nucleotidyltransferase 1, mitochondrial isoform X1 [Anas platyrhynchos]
ENSAPLG00020014169	27.261	13.5277	-1.01093	9.07038e-05	0.000744374	pol	XP_014810274.1 PREDICTED: uncharacterized protein LOC106895380 [Calidris pugnax]
ENSAPLG00020011351	3.938	18.3443	2.2198	9.20425e-05	0.000754107	NEURL1	XP_027315692.1 E3 ubiquitin-protein ligase NEURL1 isoform X1 [Anas platyrhynchos]
ENSAPLG00020004858	58.327	27.6913	-1.07473	9.41591e-05	0.000771022	PLEKHF2	XP_008628917.1 PREDICTED: pleckstrin homology domain-containing family F member 2 [Corvus brachyrhynchos]
MSTRG.11338	0.628	4.21133	2.74544	9.45909e-05	0.00077413	--	-
ENSAPLG00020014978	0.746333	4.21967	2.49924	9.46614e-05	0.000774279	ENC1	XP_005029143.1 ectoderm-neural cortex protein 1-like [Anas platyrhynchos]
ENSAPLG00020002088	156.958	69.8887	-1.16725	9.5426e-05	0.000779672	MAP4K4	XP_032051936.1 nik-related protein kinase isoform X1 [Aythya fuligula]
ENSAPLG00020017537	44.6133	91.137	1.03056	9.62253e-05	0.00078577	PLA2G12A	XP_027311742.2 group XIIA secretory phospholipase A2 [Anas platyrhynchos]
ENSAPLG00020012145	114.988	56.4497	-1.02645	9.6589e-05	0.000788304	ARSA	XP_038039423.1 arylsulfatase A [Anas platyrhynchos]
ENSAPLG00020000099	0.548	5.84567	3.41512	9.89587e-05	0.000805868	Tppp	XP_038030347.1 tubulin polymerization-promoting protein [Anas platyrhynchos]
ENSAPLG00020009240	46.4563	22.3733	-1.0541	9.99636e-05	0.000813605	DOCK8	XP_038026695.1 dedicator of cytokinesis protein 8 isoform X1 [Anas platyrhynchos]
ENSAPLG00020018198	0.001	1.392	10.4429	0.000101333	0.000823392	SPIC	EOA99861.1 Transcription factor Spi-C, partial [Anas platyrhynchos]
ENSAPLG00020004956	526.448	245.522	-1.10044	0.000101764	0.000825991	CBR1	XP_005012938.3 carbonyl reductase [NADPH] 1 [Anas platyrhynchos]
ENSAPLG00020004075	3.645	11.7117	1.68396	0.000103936	0.000841777	SYNJ2BP	XP_030308182.1 synaptojanin-2-binding protein [Calypte anna]
ENSAPLG00020011906	1.15367	9.91333	3.10314	0.000104117	0.000842776	GIMAP2	XP_027308735.2 GTPase IMAP family member 1-like [Anas platyrhynchos]
ENSAPLG00020008031	1.51033	0.0633333	-4.57576	0.000104427	0.000844568	SHISA2	XP_040399892.1 protein shisa-2 homolog [Cygnus olor]
ENSAPLG00020009324	281.851	658.204	1.2236	0.000104452	0.000844568	ALDH2	XP_038043292.1 aldehyde dehydrogenase, mitochondrial [Anas platyrhynchos]
ENSAPLG00020012584	39.2273	78.6393	1.00339	0.000105086	0.000848628	Acsl4	XP_005015274.1 long-chain-fatty-acid--CoA ligase 4 isoform X1 [Anas platyrhynchos]
MSTRG.4402	0.0393333	0.975	4.63158	0.000105685	0.000851993	--	KAI6078040.1 taxid=8832 hypothetical protein LUU34_00711600 [Aix galericulata]
ENSAPLG00020018225	0.601	2.55867	2.08996	0.000105715	0.000851993	PLCL2	XP_032058863.1 inactive phospholipase C-like protein 2 [Aythya fuligula]
ENSAPLG00020006789	19.7353	43.6843	1.14634	0.000105891	0.000852943	PACSIN2	XP_027305854.1 protein kinase C and casein kinase substrate in neurons protein 2 isoform X3 [Anas platyrhynchos]
ENSAPLG00020012802	0.0816667	1.611	4.30207	0.000106148	0.000854551	syndig1l	EOA99955.1 Capucin, partial [Anas platyrhynchos]
ENSAPLG00020008424	16.1167	42.5863	1.40184	0.000106359	0.000855332	HACD4	XP_027301932.1 very-long-chain (3R)-3-hydroxyacyl-CoA dehydratase 4 [Anas platyrhynchos]
ENSAPLG00020015152	2.10067	5.69	1.43758	0.000106361	0.000855332	ARHGEF26	XP_027320350.2 rho guanine nucleotide exchange factor 26 [Anas platyrhynchos]
ENSAPLG00020003863	421.561	856.868	1.02333	0.000110619	0.000887649	ALDOC	XP_035199145.1 LOW QUALITY PROTEIN: fructose-bisphosphate aldolase C [Oxyura jamaicensis]
ENSAPLG00020000750	0.252667	2.60567	3.36635	0.000111494	0.000893701	OPN4	XP_012959557.1 melanopsin isoform X1 [Anas platyrhynchos]
ENSAPLG00020009606	29.5217	12.8947	-1.195	0.000111869	0.000896223	USH1C	XP_027314656.1 harmonin isoform X1 [Anas platyrhynchos]
ENSAPLG00020015391	32.531	13.6847	-1.24925	0.000112268	0.000897504	ME2	XP_038026049.1 NAD-dependent malic enzyme, mitochondrial [Anas platyrhynchos]
ENSAPLG00020006996	1.08633	8.645	2.9924	0.000112271	0.000897504	CCN1	XP_027318988.1 CCN family member 1 [Anas platyrhynchos]
ENSAPLG00020015079	22.3347	9.10533	-1.2945	0.000112664	0.00090016	NEDD1	XP_027308161.1 protein NEDD1 [Anas platyrhynchos]
ENSAPLG00020012905	0.936667	5.51467	2.55767	0.000112883	0.000901418	HCRTR2	XP_005009237.1 orexin receptor type 2 isoform X1 [Anas platyrhynchos]
ENSAPLG00020010492	179.847	86.0307	-1.06385	0.000113191	0.0009033	PSEN2	XP_027309472.1 presenilin-2 isoform X1 [Anas platyrhynchos]
ENSAPLG00020016722	67.3177	27.984	-1.26638	0.00011324	0.0009033	GLTP	XP_038043485.1 glycolipid transfer protein [Anas platyrhynchos]
ENSAPLG00020002352	1.801	8.95033	2.31314	0.000114374	0.000910874	G4	EOA97319.1 Ig heavy chain V region 3, partial [Anas platyrhynchos]
ENSAPLG00020007048	0.001	3.89633	11.9279	0.000115689	0.000920358	TFPI2	XP_027306594.1 tissue factor pathway inhibitor 2 isoform X2 [Anas platyrhynchos]
ENSAPLG00020002055	288.144	143.869	-1.00204	0.000120407	0.000956349	CLN6	XP_027321420.1 ceroid-lipofuscinosis neuronal protein 6 [Anas platyrhynchos]
ENSAPLG00020000314	0.208333	2.154	3.37005	0.000122019	0.000968632	Gvin1	XP_032039457.1 interferon-induced very large GTPase 1-like [Aythya fuligula]
MSTRG.14682	13.2713	33.3467	1.32923	0.000123833	0.000981457	TRIM11	XP_032061027.1 taxid=219594 E3 ubiquitin-protein ligase TRIM58-like [Aythya fuligula]
ENSAPLG00020002015	54.4007	25.5827	-1.08846	0.00012504	0.000990488	Spart	EOB02126.1 Spartin, partial [Anas platyrhynchos]
ENSAPLG00020016957	2.33933	7.90267	1.75624	0.00012583	0.000996214	METTL4	XP_005009442.3 N(6)-adenine-specific methyltransferase METTL4 isoform X1 [Anas platyrhynchos]
ENSAPLG00020004539	116.458	53.87	-1.11226	0.000128025	0.00101197	CCDC90B	XP_038033267.1 coiled-coil domain-containing protein 90B, mitochondrial-like isoform X1 [Anas platyrhynchos]
ENSAPLG00020015109	3.046	11.395	1.90341	0.00012826	0.00101329	GPR171	XP_032048906.1 probable G-protein coupled receptor 171 [Aythya fuligula]
MSTRG.2445	4.10633	1.81067	-1.18133	0.000128887	0.0010177	--	-
ENSAPLG00020000759	5.29267	1.51667	-1.80309	0.000130162	0.00102667	ATP8A1	XP_013055292.1 PREDICTED: phospholipid-transporting ATPase IA [Anser cygnoides domesticus]
ENSAPLG00020004869	26.325	12.4783	-1.07701	0.000132933	0.00104732	MAST4	XP_038026009.1 microtubule-associated serine/threonine-protein kinase 4 isoform X3 [Anas platyrhynchos]
ENSAPLG00020000614	0.001	3.33467	11.7033	0.000133063	0.00104732	OR4S2	XP_005028457.3 olfactory receptor 4S2 [Anas platyrhynchos]
ENSAPLG00020004258	2.45	0.156333	-3.97008	0.000134921	0.00106025	trabd2a	XP_038027005.1 metalloprotease TIKI1-like isoform X2 [Anas platyrhynchos]
ENSAPLG00020000540	22.2653	9.46867	-1.23357	0.000137037	0.00107461	TBC1D5	EOA96840.1 TBC1 domain family member 5, partial [Anas platyrhynchos]
ENSAPLG00020001571	1.81267	7.87533	2.11923	0.000137847	0.00108038	Acnat2	XP_027314190.2 acyl-coenzyme A amino acid N-acyltransferase 1 isoform X1 [Anas platyrhynchos]
MSTRG.13611	0.0273333	1.572	5.8458	0.000139639	0.00109328	--	-
ENSAPLG00020008781	12.6763	29.8277	1.23451	0.000142369	0.00111406	TMEM51	XP_005015063.3 transmembrane protein 51 [Anas platyrhynchos]
ENSAPLG00020007665	0.869	4.81467	2.47001	0.000142543	0.00111483	SLK	XP_038027828.1 STE20-like serine/threonine-protein kinase [Anas platyrhynchos]
ENSAPLG00020014332	4.779	13.8267	1.53267	0.000143037	0.0011181	Csrnp2	XP_038027507.1 cysteine/serine-rich nuclear protein 2 isoform X1 [Anas platyrhynchos]
ENSAPLG00020009166	7.98433	23.0293	1.52823	0.000143358	0.00112002	VEGFA	XP_027309785.1 vascular endothelial growth factor A isoform X4 [Anas platyrhynchos]
cell differentiation;GO:1903311//regulation of mRNA metabolic process;GO:1903312//negative regulation of mRNA metabolic process;GO:1903391//regulation of adherens junction organization;GO:1903393//positive regulation of adherens junction organization;GO:1903506//regulation of nucleic acid-templated transcription;GO:1903507//negative regulation of nucleic acid-templated transcription;GO:1903508//p…
ENSAPLG00020004076	84.4587	34.576	-1.28847	0.000144258	0.00112548	N4BP2L1	XP_032057714.1 LOW QUALITY PROTEIN: NEDD4-binding protein 2-like 1, partial [Aythya fuligula]
ENSAPLG00020012362	0.791667	3.06967	1.95512	0.000144284	0.00112548	Ltbp4	XP_038028128.1 latent-transforming growth factor beta-binding protein 4-like [Anas platyrhynchos]
ENSAPLG00020002526	0.731667	2.29333	1.64819	0.000144563	0.00112677	ALPK2	XP_021130701.3 alpha-protein kinase 2 isoform X1 [Anas platyrhynchos]
ENSAPLG00020007710	27.6003	13.486	-1.03322	0.000144601	0.00112677	TRMT10B	XP_032062246.1 tRNA methyltransferase 10 homolog B-like [Aythya fuligula]
MSTRG.12789	7.34867	30.1743	2.03777	0.000145278	0.00113025	NUGGC	XP_032040420.1 taxid=219594 nuclear GTPase SLIP-GC-like [Aythya fuligula]
ENSAPLG00020004155	4.698	14.6783	1.64357	0.000145474	0.00113118	PMS2	XP_027325102.1 mismatch repair endonuclease PMS2 [Anas platyrhynchos]
ENSAPLG00020015630	1.64633	0.0843333	-4.28701	0.000145914	0.00113303	PKP1	XP_005013766.1 plakophilin-1 isoform X1 [Anas platyrhynchos]
ENSAPLG00020013705	0.653333	7.42733	3.50695	0.00014592	0.00113303	GDF11	XP_032060715.1 growth/differentiation factor 11 [Aythya fuligula]
ENSAPLG00020015561	0.636667	3.297	2.37254	0.00014594	0.00113303	FRRS1	XP_027318401.2 ferric-chelate reductase 1 [Anas platyrhynchos]
ENSAPLG00020014109	1.325	17.5863	3.73039	0.000146208	0.00113451	FRMD4B	XP_027323245.2 FERM domain-containing protein 4B isoform X1 [Anas platyrhynchos]
ENSAPLG00020005355	1.06	5.715	2.43069	0.000148433	0.00115057	TUBB3	XP_005010451.1 tubulin beta-1 chain isoform X1 [Anas platyrhynchos]
ENSAPLG00020007841	22.7063	11.2727	-1.01027	0.000148536	0.00115076	Pex6	EOA94682.1 Peroxisome assembly factor 2, partial [Anas platyrhynchos]
ENSAPLG00020013532	0.18	2.74467	3.93056	0.000148996	0.0011534	MYZAP	XP_032050509.1 myocardial zonula adherens protein isoform X1 [Aythya fuligula]
MSTRG.5160	0.216667	3.20533	3.88693	0.000149032	0.0011534	--	XP_027322798.1 taxid=8839 uncharacterized protein LOC101796494 isoform X2 [Anas platyrhynchos]
ENSAPLG00020015596	13.6007	5.31233	-1.35626	0.000149459	0.0011561	ACP6	XP_027305146.2 lysophosphatidic acid phosphatase type 6 isoform X1 [Anas platyrhynchos]
ENSAPLG00020015317	0.0823333	1.02567	3.63894	0.000149583	0.00115646	DSCAML1	XP_027299963.2 LOW QUALITY PROTEIN: Down syndrome cell adhesion molecule-like protein 1 [Anas platyrhynchos]
ENSAPLG00020009585	19.0157	7.84667	-1.27704	0.000149772	0.00115731	VLDLR	XP_038025306.1 LOW QUALITY PROTEIN: very low-density lipoprotein receptor-like [Anas platyrhynchos]
ENSAPLG00020002806	31.299	13.5077	-1.21234	0.000149963	0.00115819	Lyrm7	XP_035166490.1 complex III assembly factor LYRM7 isoform X1 [Oxyura jamaicensis]
ENSAPLG00020016112	45.008	16.665	-1.43336	0.00015008	0.00115849	FAM210B	XP_027298676.2 LOW QUALITY PROTEIN: protein FAM210B, mitochondrial [Anas platyrhynchos]
ENSAPLG00020007021	0.735333	3.693	2.32832	0.000150337	0.00115987	SYT6	XP_012947668.1 synaptotagmin-6 [Anas platyrhynchos]
ENSAPLG00020015337	0.536	4.299	3.0037	0.000150428	0.00115996	RAB27B	XP_012947708.1 ras-related protein Rab-27B [Anas platyrhynchos]
ENSAPLG00020018315	23.0483	46.6297	1.01659	0.000151441	0.00116656	Fam234a	XP_038042971.1 LOW QUALITY PROTEIN: protein FAM234A [Anas platyrhynchos]
MSTRG.225	3.22633	10.2203	1.66347	0.00015429	0.00118727	--	-
ENSAPLG00020015145	0.128333	2.939	4.51736	0.000154486	0.00118816	Elf3	XP_027300797.1 ETS-related transcription factor Elf-3 [Anas platyrhynchos]
ENSAPLG00020016617	6.43333	18.8697	1.55243	0.000156277	0.00120007	HSF4	XP_005025788.2 heat shock factor protein 4 isoform X1 [Anas platyrhynchos]
ENSAPLG00020005917	20.912	55.905	1.41865	0.000156907	0.00120429	TNIP1	XP_035194709.1 TNFAIP3-interacting protein 1 isoform X3 [Oxyura jamaicensis]
ENSAPLG00020018415	2.281	0.177667	-3.68242	0.000158508	0.00121531	OMD	XP_012960636.1 osteomodulin [Anas platyrhynchos]
ENSAPLG00020015426	10.3403	2.46333	-2.0696	0.000159105	0.00121926	gpr173	XP_009561445.1 PREDICTED: probable G-protein coupled receptor 27 [Cuculus canorus]
ENSAPLG00020011564	4.538	19.4257	2.09784	0.000160194	0.00122697	PRRG1	XP_032053737.1 transmembrane gamma-carboxyglutamic acid protein 1, partial [Aythya fuligula]
ENSAPLG00020006647	58.5107	22.298	-1.39179	0.000160692	0.00123015	ANO6	XP_027312580.2 anoctamin-6 isoform X1 [Anas platyrhynchos]
MSTRG.508	0.001	2.558	11.3208	0.000161278	0.00123399	IL26	EOA96239.1 taxid=8839 Interleukin-26, partial [Anas platyrhynchos]
ENSAPLG00020011039	0.001	0.849667	9.73075	0.000163056	0.00124696	CD163L1	XP_032060934.1 antigen WC1.1-like [Aythya fuligula]
ENSAPLG00020008392	11.1513	32.997	1.56512	0.000163475	0.00124951	BAMBI	XP_012948869.3 BMP and activin membrane-bound inhibitor homolog [Anas platyrhynchos]
ENSAPLG00020006054	23.556	53.629	1.18692	0.000164417	0.00125522	EPN3	XP_027327142.2 LOW QUALITY PROTEIN: epsin-3 [Anas platyrhynchos]
ENSAPLG00020009961	10.8457	4.878	-1.15276	0.000164475	0.00125522	ACAD11	XP_021129937.3 acyl-CoA dehydrogenase family member 11 [Anas platyrhynchos]
ENSAPLG00020000849	25.285	8.24967	-1.61587	0.000164835	0.00125731	Abcg1	XP_005030527.1 ATP-binding cassette sub-family G member 1 [Anas platyrhynchos]
ENSAPLG00020000675	17.7137	8.38867	-1.07835	0.000165631	0.00126273	Tmem245	XP_032036998.1 transmembrane protein 245 [Aythya fuligula]
ENSAPLG00020000667	0.001	0.422	8.7211	0.000166446	0.00126818	Scn5a	XP_038030677.1 sodium channel protein type 5 subunit alpha isoform X1 [Anas platyrhynchos]
ENSAPLG00020018070	26.11	60.066	1.20195	0.000166837	0.00126997	POLR3F	XP_005012160.1 DNA-directed RNA polymerase III subunit RPC6 isoform X1 [Anas platyrhynchos]
ENSAPLG00020008835	0.0743333	2.52933	5.0886	0.00016753	0.00127393	TAT	XP_005028847.1 tyrosine aminotransferase isoform X2 [Anas platyrhynchos]
ENSAPLG00020001054	1.92633	0.200333	-3.26538	0.000169164	0.0012857	Adamts1	XP_032055717.1 A disintegrin and metalloproteinase with thrombospondin motifs 1 [Aythya fuligula]
ENSAPLG00020005978	0.865333	0.069	-3.64859	0.000169592	0.00128829	RAPGEF4	XP_027316975.1 rap guanine nucleotide exchange factor 4 isoform X1 [Anas platyrhynchos]
MSTRG.19153	11332.7	5358.65	-1.08055	0.000169938	0.00129026	--	-
ENSAPLG00020017601	13.6753	5.872	-1.21965	0.00017015	0.0012912	DPH6	XP_027314046.2 diphthine--ammonia ligase isoform X1 [Anas platyrhynchos]
MSTRG.18412	38.162	18.0977	-1.07633	0.000172781	0.00130849	smarcal1	XP_027317207.2 taxid=8839 LOW QUALITY PROTEIN: SWI/SNF-related matrix-associated actin-dependent regulator of chromatin subfamily A-like protein 1 [Anas platyrhynchos]
ENSAPLG00020009450	3.767	12.5557	1.73685	0.000175341	0.0013272	Cd274	XP_027302587.1 programmed cell death 1 ligand 2 isoform X1 [Anas platyrhynchos]
ENSAPLG00020012139	13.92	6.856	-1.02172	0.000177165	0.00134032	PITPNM3	XP_027328349.2 membrane-associated phosphatidylinositol transfer protein 3 isoform X2 [Anas platyrhynchos]
ENSAPLG00020004874	0.246667	1.55	2.65163	0.000177683	0.00134355	Dchs1	XP_027321702.1 protocadherin-16 isoform X1 [Anas platyrhynchos]
ENSAPLG00020013198	74.5137	35.732	-1.06029	0.000178874	0.00135187	RFTN2	XP_005021939.3 raftlin-2 isoform X1 [Anas platyrhynchos]
ENSAPLG00020018006	4.34667	14.503	1.73837	0.000179399	0.00135446	BTBD11	XP_027305684.1 ankyrin repeat and BTB/POZ domain-containing protein BTBD11 isoform X4 [Anas platyrhynchos]
ENSAPLG00020009750	1.89667	5.146	1.43999	0.000182268	0.00137471	Trim46	XP_038023687.1 tripartite motif-containing protein 46 [Anas platyrhynchos]
ENSAPLG00020005277	6.93967	2.92633	-1.24577	0.000182934	0.00137693	lzts2	XP_038037482.1 LOW QUALITY PROTEIN: leucine zipper putative tumor suppressor 2 [Anas platyrhynchos]
ENSAPLG00020010401	0.381	3.73133	3.29183	0.000183235	0.0013778	CRNN	XP_038024016.1 cornulin-like [Anas platyrhynchos]
ENSAPLG00020012422	31.229	108.704	1.79945	0.000183478	0.00137892	G0s2	XP_035202785.1 G0/G1 switch protein 2 [Oxyura jamaicensis]
ENSAPLG00020015775	0.001	1.36267	10.4122	0.000184616	0.00138677	CCKAR	EOB01574.1 Cholecystokinin receptor type A, partial [Anas platyrhynchos]
ENSAPLG00020003282	15.331	5.30433	-1.53121	0.000186664	0.00140145	ATP8B1	XP_027302969.1 phospholipid-transporting ATPase IC [Anas platyrhynchos]
ENSAPLG00020018073	14.7633	41.466	1.48991	0.000187255	0.00140517	NT5DC3	XP_035420075.1 5'-nucleotidase domain-containing protein 3 [Cygnus atratus]
ENSAPLG00020013967	4.18933	40.0033	3.25533	0.000187364	0.00140527	FMNL3	XP_035426258.1 formin-like protein 3 [Cygnus atratus]
ENSAPLG00020010962	20.6673	7.07067	-1.54743	0.00019109	0.00142961	Pcyt1b	XP_038024814.1 choline-phosphate cytidylyltransferase B isoform X4 [Anas platyrhynchos]
ENSAPLG00020012807	14.4357	34.8757	1.27258	0.00019143	0.00143142	SASH1	XP_038031831.1 SAM and SH3 domain-containing protein 1 isoform X4 [Anas platyrhynchos]
ENSAPLG00020013018	156.718	77.728	-1.01166	0.000191757	0.00143315	Ifngr1	XP_027310261.1 LOW QUALITY PROTEIN: interferon gamma receptor 1 [Anas platyrhynchos]
ENSAPLG00020006551	22.6067	10.3923	-1.12123	0.000194424	0.00145235	IRAK4	XP_027312722.2 interleukin-1 receptor-associated kinase 4 isoform X1 [Anas platyrhynchos]
ENSAPLG00020004339	21.2523	7.68	-1.46844	0.000194526	0.00145238	CEP152	XP_038041025.1 centrosomal protein of 152 kDa isoform X1 [Anas platyrhynchos]
ENSAPLG00020008812	28.5847	61.1327	1.0967	0.000195539	0.00145921	Arfgap1	XP_038022031.1 ADP-ribosylation factor GTPase-activating protein 1 isoform X3 [Anas platyrhynchos]
ENSAPLG00020005730	0.317667	6.65867	4.38965	0.000196366	0.0014639	DUSP19	XP_027317226.1 dual specificity protein phosphatase 19 [Anas platyrhynchos]
ENSAPLG00020004391	35.5633	13.9137	-1.35389	0.000199643	0.00148683	B3GLCT	XP_027325811.2 beta-1,3-glucosyltransferase isoform X1 [Anas platyrhynchos]
MSTRG.15918	0.0713333	4.82233	6.07901	0.000202859	0.00150927	--	-
ENSAPLG00020017146	57.6247	22.4283	-1.36136	0.000203766	0.00151526	CTNS	XP_032056805.1 cystinosin [Aythya fuligula]
ENSAPLG00020017280	262.5	128.239	-1.03349	0.000206037	0.00152863	CHMP1B	XP_005526187.1 PREDICTED: charged multivesicular body protein 1b [Pseudopodoces humilis]
ENSAPLG00020002128	0.0366667	2.254	5.94187	0.000206081	0.00152863	Neu2	XP_027320289.1 sialidase-2 isoform X1 [Anas platyrhynchos]
ENSAPLG00020013884	0.735333	6.431	3.12857	0.000206357	0.00152991	CALD1	XP_012952593.1 caldesmon isoform X5 [Anas platyrhynchos]
MSTRG.12509	3.106	10.4353	1.74835	0.000207583	0.00153823	--	XP_027328060.2 taxid=8839 leucine-rich alpha-2-glycoprotein [Anas platyrhynchos]
MSTRG.18884	7.475	18.4613	1.30436	0.000208868	0.00154698	--	XP_035186443.1 taxid=8884 uncharacterized protein LOC118169326 isoform X1 [Oxyura jamaicensis]
ENSAPLG00020006314	33.5563	16.233	-1.04766	0.00020985	0.0015527	SLC29A3	EOA95122.1 Equilibrative nucleoside transporter 3, partial [Anas platyrhynchos]
ENSAPLG00020014302	1.01467	0.022	-5.52736	0.000210929	0.0015599	ADAMTS17	XP_032050518.1 A disintegrin and metalloproteinase with thrombospondin motifs 17 [Aythya fuligula]
ENSAPLG00020007106	5.212	1.19867	-2.12041	0.000212978	0.0015727	HCK	XP_027328565.1 tyrosine-protein kinase HCK isoform X1 [Anas platyrhynchos]
ENSAPLG00020013320	58.2617	29.1147	-1.0008	0.000216965	0.00160055	TBC1D12	XP_038037505.1 TBC1 domain family member 12 isoform X2 [Anas platyrhynchos]
ENSAPLG00020013501	36.0217	13.9543	-1.36815	0.000217988	0.0016065	Acat2	EOB03979.1 Acetyl-CoA acetyltransferase, cytosolic, partial [Anas platyrhynchos]
ENSAPLG00020000393	3.397	7.812	1.20143	0.000219353	0.00161495	SPINT1	XP_005031028.1 kunitz-type protease inhibitor 1 isoform X1 [Anas platyrhynchos]
ENSAPLG00020017647	0.0256667	1.361	5.72863	0.000221977	0.00163215	KLHL3	XP_032052923.1 kelch-like protein 3 isoform X2 [Aythya fuligula]
ENSAPLG00020015338	4.78667	1.57133	-1.60703	0.00022202	0.00163215	Sh2d2a	XP_038028448.1 SH2 domain-containing protein 2A [Anas platyrhynchos]
MSTRG.20581	0.001	2.26267	11.1438	0.00022278	0.00163693	ZAN	XP_038028059.1 taxid=8839 IgGFc-binding protein-like [Anas platyrhynchos]
MSTRG.14124	1.84267	7.22467	1.97114	0.000223411	0.00163994	--	PKU36123.1 taxid=1758121 aryl hydrocarbon receptor nuclear translocator-like protein 2 isoform x1 [Limosa lapponica baueri]
ENSAPLG00020016449	3.83267	22.973	2.58352	0.000224862	0.00164814	CCL5	EOB07867.1 C-C motif chemokine 4, partial [Anas platyrhynchos]
MSTRG.13237	6.14633	13.5923	1.145	0.00022597	0.0016552	--	KAJ7397258.1 taxid=371930 hypothetical protein BTVI_136908 [Pitangus sulphuratus]
MSTRG.17139	18.821	8.43567	-1.15777	0.00022605	0.0016552	CCDC86	XP_027314196.2 taxid=8839 coiled-coil domain-containing protein 86 [Anas platyrhynchos]
ENSAPLG00020002534	100.669	48.616	-1.05012	0.000227981	0.00166769	GADD45G	XP_027302576.2 growth arrest and DNA damage-inducible protein GADD45 gamma [Anas platyrhynchos]
ENSAPLG00020016811	19.189	9.308	-1.04374	0.000229063	0.00167396	TPST2	XP_038043441.1 protein-tyrosine sulfotransferase 2 [Anas platyrhynchos]
ENSAPLG00020014300	23.017	7.37533	-1.64192	0.000229691	0.00167771	MRC2	XP_027301078.1 LOW QUALITY PROTEIN: C-type mannose receptor 2 [Anas platyrhynchos]
ENSAPLG00020006581	0.710667	3.77067	2.40757	0.000230397	0.00168194	CAMKK1	XP_032056746.1 calcium/calmodulin-dependent protein kinase kinase 1 [Aythya fuligula]
ENSAPLG00020001228	31.1033	15.177	-1.03518	0.000230496	0.00168194	MSRA	XP_038033063.1 mitochondrial peptide methionine sulfoxide reductase isoform X1 [Anas platyrhynchos]
ENSAPLG00020013793	1.738	0.001	-10.7632	0.000232137	0.00169308	SNAI2	KAG0114713.1 hypothetical protein IHE44_007313 [Lamprotornis superbus]
ENSAPLG00020008482	19.1097	9.19933	-1.0547	0.000232675	0.00169476	DAGLB	XP_027325103.2 diacylglycerol lipase-beta isoform X1 [Anas platyrhynchos]
ENSAPLG00020011270	2.545	0.044	-5.85402	0.000232711	0.00169476	SRD5A2	XP_032041154.1 3-oxo-5-alpha-steroid 4-dehydrogenase 2 [Aythya fuligula]
MSTRG.9836	5.34667	12.0457	1.1718	0.000236014	0.00171544	--	CAK6566308.1 taxid=9079 unnamed protein product [Alectoris rufa]
ENSAPLG00020011211	0.681333	3.09667	2.18428	0.000237665	0.0017266	COL17A1	XP_027315684.2 LOW QUALITY PROTEIN: collagen alpha-1(XVII) chain [Anas platyrhynchos]
ENSAPLG00020004895	7.40633	2.30133	-1.68629	0.000239025	0.00173478	SCRN2	XP_032058557.1 secernin-2 [Aythya fuligula]
ENSAPLG00020004876	7.35633	16.4017	1.15678	0.000243696	0.00176522	SP2	XP_032058556.1 transcription factor Sp2 [Aythya fuligula]
ENSAPLG00020001749	15.881	32.642	1.03943	0.000243879	0.00176568	URB1	XP_027304999.2 nucleolar pre-ribosomal-associated protein 1 [Anas platyrhynchos]
ENSAPLG00020013808	2.13533	9.14367	2.09831	0.000244551	0.00176881	TXK	XP_005028155.1 tyrosine-protein kinase TXK isoform X1 [Anas platyrhynchos]
ENSAPLG00020007432	0.295	1.981	2.74744	0.000247611	0.0017892	scnn1a	XP_005008876.2 amiloride-sensitive sodium channel subunit delta [Anas platyrhynchos]
ENSAPLG00020009468	0.558667	3.63867	2.70335	0.000252963	0.00182533	GVINP1	XP_032039457.1 interferon-induced very large GTPase 1-like [Aythya fuligula]
MSTRG.18369	0.001	1.483	10.5343	0.00025298	0.00182533	C1QL2	XP_040418077.1 taxid=8869 complement C1q-like protein 2 isoform X1 [Cygnus olor]
ENSAPLG00020005924	20.5597	9.68233	-1.08639	0.00025694	0.00185119	PDZD8	XP_027315786.2 PDZ domain-containing protein 8 [Anas platyrhynchos]
ENSAPLG00020014231	19.4757	59.499	1.61119	0.000257648	0.00185539	C19orf12	EOB00819.1 Uncharacterized protein C19orf12-like protein, partial [Anas platyrhynchos]
ENSAPLG00020000694	0.001	1.04133	10.0242	0.000259631	0.00186819	TPH2	XP_027311290.1 tryptophan 5-hydroxylase 2 isoform X1 [Anas platyrhynchos]
ENSAPLG00020014438	1.63033	7.94833	2.28549	0.000259677	0.00186819	G4	EOA97319.1 Ig heavy chain V region 3, partial [Anas platyrhynchos]
ENSAPLG00020003450	27.484	12.8333	-1.0987	0.000260807	0.00187541	SERHL2	EOB06743.1 Serine hydrolase-like protein 2, partial [Anas platyrhynchos]
ENSAPLG00020011843	81.4907	33.1513	-1.29757	0.000261126	0.00187679	Pkn2	XP_038020962.1 serine/threonine-protein kinase N3 isoform X1 [Anas platyrhynchos]
ENSAPLG00020015131	0.708667	2.42767	1.77639	0.000261741	0.00187939	CDK18	XP_013045212.1 PREDICTED: cyclin-dependent kinase 18 [Anser cygnoides domesticus]
ENSAPLG00020010905	2.78133	7.57567	1.4456	0.000262234	0.00188201	CLEC2D	XP_038043660.1 C-type lectin domain family 2 member D-like isoform X1 [Anas platyrhynchos]
ENSAPLG00020004690	0.0636667	2.133	5.0662	0.000263073	0.0018862	CD163L1	XP_038028667.1 scavenger receptor cysteine-rich type 1 protein M130-like [Anas platyrhynchos]
ENSAPLG00020012385	0.001	1.055	10.043	0.000264623	0.00189548	CRLF1	XP_032059813.1 cytokine receptor-like factor 1 [Aythya fuligula]
ENSAPLG00020013017	9.51167	26.6477	1.48624	0.000265787	0.0019029	ZBTB46	XP_021133503.1 zinc finger and BTB domain-containing protein 46 isoform X4 [Anas platyrhynchos]
ENSAPLG00020006380	5.44	17.37	1.67492	0.000265995	0.00190347	PCBD1	XP_005028393.2 pterin-4-alpha-carbinolamine dehydratase [Anas platyrhynchos]
ENSAPLG00020010665	24.418	55.239	1.17774	0.000268734	0.00192121	zfyve28	XP_032041972.1 lateral signaling target protein 2 homolog isoform X1 [Aythya fuligula]
MSTRG.10925	6.061	19.5307	1.68811	0.000271271	0.00193842	--	XP_035202120.1 taxid=8884 uncharacterized protein LOC118178020 [Oxyura jamaicensis]
ENSAPLG00020009863	20.4623	10.214	-1.00242	0.000271643	0.00193921	KDM4C	XP_038026442.1 lysine-specific demethylase 4C isoform X2 [Anas platyrhynchos]
ENSAPLG00020005385	47.224	107.939	1.19262	0.000274711	0.00195922	TTC3	XP_027304923.2 E3 ubiquitin-protein ligase TTC3 isoform X1 [Anas platyrhynchos]
ENSAPLG00020003646	2.44167	8.28467	1.76258	0.000275986	0.00196642	gpr146	XP_042720749.1 probable G-protein coupled receptor 146 isoform X2 [Lagopus leucura]
ENSAPLG00020018196	103.905	210.265	1.01694	0.000276566	0.00196866	DNAJC7	XP_040392725.1 dnaJ homolog subfamily C member 7 [Cygnus olor]
ENSAPLG00020000792	1.335	0.203333	-2.71492	0.000281368	0.00200092	Fhod3	XP_027307588.1 FH1/FH2 domain-containing protein 3 isoform X7 [Anas platyrhynchos]
ENSAPLG00020011733	0.926333	7.55833	3.02846	0.000282832	0.00201036	GIMAP7	XP_038030417.1 GTPase IMAP family member 7-like isoform X1 [Anas platyrhynchos]
ENSAPLG00020005374	29.5383	59.335	1.00629	0.000284218	0.00201924	FHOD1	XP_038041433.1 LOW QUALITY PROTEIN: FH1/FH2 domain-containing protein 1 [Anas platyrhynchos]
ENSAPLG00020010924	0.622667	5.628	3.17609	0.000285994	0.00203089	--	XP_005017846.3 B- and T-lymphocyte attenuator isoform X1 [Anas platyrhynchos]
ENSAPLG00020003725	3.98067	9.71567	1.2873	0.000286914	0.00203645	ADAMTSL2	XP_027326591.1 ADAMTS-like protein 2 isoform X3 [Anas platyrhynchos]
MSTRG.15267	0.001	4.999	12.2874	0.000288503	0.00204674	CD163	XP_038028119.1 taxid=8839 scavenger receptor cysteine-rich type 1 protein M130-like [Anas platyrhynchos]
MSTRG.3557	0.001	0.695667	9.44225	0.000288734	0.0020474	--	-
ENSAPLG00020010639	0.412667	3.27633	2.98903	0.000289363	0.00205088	Znf385b	XP_005013632.2 zinc finger protein 385B isoform X1 [Anas platyrhynchos]
ENSAPLG00020003413	0.273	14.5713	5.73809	0.000290255	0.00205622	GJC1	XP_035422868.1 gap junction gamma-1 protein [Cygnus atratus]
ENSAPLG00020010715	0.579333	0.001	-9.17825	0.000290938	0.00206007	Ttn	XP_038038013.1 titin isoform X13 [Anas platyrhynchos]
ENSAPLG00020013425	64.4147	31.6633	-1.02458	0.000291379	0.00206221	CCPG1	XP_027322831.1 cell cycle progression protein 1 isoform X2 [Anas platyrhynchos]
ENSAPLG00020009996	0.0376667	1.69567	5.49242	0.000293217	0.00207323	--	XP_035425616.1 palmitoyltransferase ZDHHC21 isoform X1 [Cygnus atratus]
ENSAPLG00020011009	0.516667	3.959	2.93783	0.000293789	0.00207629	Prdm8	XP_027312788.1 PR domain zinc finger protein 8 [Anas platyrhynchos]
MSTRG.342	18.5423	8.862	-1.06512	0.000296176	0.00209016	TUBGCP6	XP_038023499.1 taxid=8839 gamma-tubulin complex component 6 [Anas platyrhynchos]
ENSAPLG00020013836	17.091	6.95267	-1.2976	0.000296959	0.00209278	HDHD5	XP_038036730.1 haloacid dehalogenase-like hydrolase domain-containing 5 [Anas platyrhynchos]
ENSAPLG00020017892	7.92533	3.02	-1.39192	0.000296971	0.00209278	Tnfsf10	XP_038040481.1 LOW QUALITY PROTEIN: tumor necrosis factor ligand superfamily member 10 [Anas platyrhynchos]
MSTRG.5015	0.432333	6.96367	4.00963	0.000298097	0.00209972	--	EOA94909.1 taxid=8839 hypothetical protein Anapl_17889 [Anas platyrhynchos]
ENSAPLG00020001298	2.71833	8.04933	1.56615	0.000298665	0.00210272	slc22a15b	XP_027319606.1 solute carrier family 22 member 15-like isoform X1 [Anas platyrhynchos]
ENSAPLG00020016776	14.128	46.0313	1.70406	0.000299309	0.00210626	RCJMB04_21h11	XP_038043455.1 LOW QUALITY PROTEIN: uncharacterized protein KIAA1671 homolog [Anas platyrhynchos]
ENSAPLG00020009106	0.300333	6.851	4.51168	0.000299976	0.00210995	WNT4	NP_990114.1 protein Wnt-4 precursor [Gallus gallus]
ENSAPLG00020010952	51.067	25.3027	-1.0131	0.000305004	0.00214327	TM2D2	XP_027299400.1 TM2 domain-containing protein 2 [Anas platyrhynchos]
ENSAPLG00020016316	21.4653	48.9083	1.18807	0.000308364	0.00216278	METTL27	XP_027301767.2 methyltransferase-like protein 27 [Anas platyrhynchos]
ENSAPLG00020003453	10.972	4.51667	-1.2805	0.000308751	0.00216447	Ralgps1	XP_038021061.1 ras-specific guanine nucleotide-releasing factor RalGPS1 isoform X6 [Anas platyrhynchos]
ENSAPLG00020005569	5.96033	1.666	-1.839	0.000310384	0.00217489	Ttc8	XP_027314302.1 tetratricopeptide repeat protein 8 isoform X1 [Anas platyrhynchos]
ENSAPLG00020012775	0.274667	2.33033	3.08478	0.000311585	0.00218109	zfpm1	XP_038041290.1 LOW QUALITY PROTEIN: zinc finger protein ZFPM1 [Anas platyrhynchos]
ENSAPLG00020002397	32.0997	15.6263	-1.03858	0.000311705	0.00218109	VRK3	XP_027324766.1 inactive serine/threonine-protein kinase VRK3 [Anas platyrhynchos]
ENSAPLG00020002032	7.572	2.89367	-1.38778	0.000315866	0.002206	LRP4	EOB05435.1 Low-density lipoprotein receptor-related protein 4, partial [Anas platyrhynchos]
ENSAPLG00020001987	17.9183	2.51633	-2.83204	0.000320724	0.00223676	RYR3	XP_027314648.1 ryanodine receptor 3 isoform X17 [Anas platyrhynchos]
ENSAPLG00020005204	8.35733	18.9177	1.17862	0.00032255	0.00224738	INPP5F	XP_038036832.1 phosphatidylinositide phosphatase SAC2 isoform X1 [Anas platyrhynchos]
MSTRG.7088	15.9777	39.9377	1.32169	0.000324153	0.00225749	--	XP_038021420.1 taxid=8839 LOW QUALITY PROTEIN: E3 ubiquitin-protein ligase RNF213 [Anas platyrhynchos]
ENSAPLG00020015116	64.1367	24.333	-1.39824	0.000328981	0.00228467	P2RY12	XP_005023709.1 P2Y purinoceptor 12 isoform X2 [Anas platyrhynchos]
ENSAPLG00020014303	3.111	6.955	1.16067	0.000331123	0.00229847	SLC4A4	XP_021122666.1 electrogenic sodium bicarbonate cotransporter 1 isoform X4 [Anas platyrhynchos]
ENSAPLG00020004594	44.4117	22.1547	-1.00333	0.000334119	0.00231669	PGP	XP_027324662.2 glycerol-3-phosphate phosphatase [Anas platyrhynchos]
ENSAPLG00020013016	18.4347	50.3657	1.45002	0.000341147	0.00236251	IL22RA2	XP_012953195.3 interleukin-22 receptor subunit alpha-2 [Anas platyrhynchos]
ENSAPLG00020006472	1.24633	0.0606667	-4.36064	0.000345682	0.00239277	Scube1	XP_027305869.1 signal peptide, CUB and EGF-like domain-containing protein 1 isoform X2 [Anas platyrhynchos]
ENSAPLG00020011485	19.1677	9.20933	-1.05751	0.000345839	0.00239277	Dele1	XP_027324130.2 death ligand signal enhancer [Anas platyrhynchos]
MSTRG.20787	20.322	60.5577	1.57527	0.000347929	0.0024061	--	EOA93195.1 taxid=8839 Nuclear RNA export factor 1, partial [Anas platyrhynchos]
MSTRG.21561	0.001	2.42533	11.244	0.0003481	0.00240616	--	-
ENSAPLG00020011628	23.5073	10.515	-1.16066	0.000351587	0.00242913	PECR	XP_027317198.2 peroxisomal trans-2-enoyl-CoA reductase [Anas platyrhynchos]
ENSAPLG00020012773	0.108667	0.534667	2.29873	0.000354431	0.00244764	ZNF469	XP_038041550.1 LOW QUALITY PROTEIN: zinc finger protein 469 [Anas platyrhynchos]
ENSAPLG00020007552	0.001	1.44	10.4919	0.000359341	0.00247923	Il11ra1	XP_038026876.1 interleukin-11 receptor subunit alpha isoform X2 [Anas platyrhynchos]
MSTRG.17742	0.573	5.40467	3.2376	0.000361688	0.00249426	NAV2	XP_027314738.2 taxid=8839 neuron navigator 2 isoform X6 [Anas platyrhynchos]
MSTRG.20637	0.001	2.22	11.1163	0.000366555	0.0025243	Cd22	KAI6061817.1 taxid=8832 B-cell receptor CD22 [Aix galericulata]
ENSAPLG00020002543	28.6247	11.6943	-1.29145	0.000367174	0.00252622	OPHN1	XP_038039948.1 oligophrenin-1 isoform X2 [Anas platyrhynchos]
ENSAPLG00020010768	53.984	25.9393	-1.05739	0.000368254	0.00253247	PM20D1	XP_027300887.2 N-fatty-acyl-amino acid synthase/hydrolase PM20D1 isoform X1 [Anas platyrhynchos]
MSTRG.11480	2.97067	6.63967	1.16032	0.000372102	0.00255419	--	KAK4829048.1 taxid=33587 hypothetical protein QYF61_001853 [Mycteria americana]
ENSAPLG00020011701	2.01	0.185333	-3.439	0.000372664	0.00255686	DHRS9	XP_005019003.1 dehydrogenase/reductase SDR family member 9 isoform X1 [Anas platyrhynchos]
ENSAPLG00020014663	0.273333	4.49733	4.04034	0.000373099	0.00255866	RGS5	XP_032048583.1 regulator of G-protein signaling 5 isoform X1 [Aythya fuligula]
ENSAPLG00020015974	44.6053	18.0527	-1.305	0.000376732	0.0025798	BST1	XP_032043298.1 ADP-ribosyl cyclase/cyclic ADP-ribose hydrolase 2-like [Aythya fuligula]
ENSAPLG00020010066	0.389667	2.573	2.72314	0.000376872	0.0025798	VAT1L	XP_005018314.2 synaptic vesicle membrane protein VAT-1 homolog-like [Anas platyrhynchos]
ENSAPLG00020007863	0.001	0.726333	9.50449	0.000377485	0.00258276	TSHZ1	XP_038030891.1 LOW QUALITY PROTEIN: teashirt homolog 1 [Anas platyrhynchos]
MSTRG.6042	2.513	8.77433	1.80388	0.000385224	0.0026345	NLRC3	AFP44851.1 taxid=8839 NLRC3 protein [Anas platyrhynchos]
ENSAPLG00020013189	1.64633	0.247	-2.73667	0.000386051	0.00263871	Kirrel1	XP_038023828.1 kin of IRRE-like protein 1 isoform X1 [Anas platyrhynchos]
ENSAPLG00020005286	2.73733	1.00067	-1.45181	0.000386196	0.00263871	THNSL2	XP_012958639.4 threonine synthase-like 2 [Anas platyrhynchos]
ENSAPLG00020003200	57.2373	26.0807	-1.13398	0.000387428	0.00264591	Pts	XP_027300128.1 6-pyruvoyl tetrahydrobiopterin synthase isoform X3 [Anas platyrhynchos]
MSTRG.9697	1.40467	4.507	1.68194	0.000387884	0.0026478	--	-
ENSAPLG00020016854	0.022	0.945333	5.42525	0.000388385	0.00264878	ITGA9	XP_027307184.1 integrin alpha-9 isoform X1 [Anas platyrhynchos]
ENSAPLG00020017038	27.8927	13.2	-1.07935	0.000389042	0.00265204	nle1	OXB71879.1 hypothetical protein H355_004225 [Colinus virginianus]
ENSAPLG00020006202	2.92067	0.666667	-2.13126	0.000390546	0.00265984	TGFBR2	XP_027318138.2 LOW QUALITY PROTEIN: TGF-beta receptor type-2-like [Anas platyrhynchos]
ENSAPLG00020007786	4.20533	21.429	2.34927	0.000396065	0.00269333	--	XP_005029611.1 lymphotactin [Anas platyrhynchos]
ENSAPLG00020009620	2.577	0.498333	-2.37051	0.000400747	0.00272056	Usp43	XP_038021359.1 LOW QUALITY PROTEIN: ubiquitin carboxyl-terminal hydrolase 43 [Anas platyrhynchos]
ENSAPLG00020010828	25.3077	58.403	1.20647	0.00040474	0.00274641	RASSF5	EOB07035.1 Ras association domain-containing family protein 5, partial [Anas platyrhynchos]
MSTRG.2749	1.132	4.816	2.08896	0.000413359	0.00280105	--	EOB04535.1 taxid=8839 hypothetical protein Anapl_09267 [Anas platyrhynchos]
ENSAPLG00020013567	0.001	1.82733	10.8355	0.000413754	0.00280244	Trim63	XP_032058363.1 E3 ubiquitin-protein ligase TRIM63 [Aythya fuligula]
ENSAPLG00020005322	15.9373	7.41267	-1.10435	0.000416704	0.00282113	HLCS	XP_027304928.2 LOW QUALITY PROTEIN: biotin--protein ligase [Anas platyrhynchos]
ENSAPLG00020009277	26.1047	54.588	1.06428	0.000423678	0.00286573	SLC7A3	XP_027320942.2 cationic amino acid transporter 3 [Anas platyrhynchos]
ENSAPLG00020009840	40.9257	19.52	-1.06805	0.000425266	0.00287515	RASGRP3	XP_027309734.1 ras guanyl-releasing protein 3 isoform X2 [Anas platyrhynchos]
ENSAPLG00020014032	0.559667	4.77767	3.09367	0.000432024	0.00291287	ADCY6	XP_032060677.1 adenylate cyclase type 6 [Aythya fuligula]
MSTRG.13856	0.0663333	3.88833	5.87327	0.000433555	0.00292186	--	-
ENSAPLG00020015536	4.56133	17.4003	1.93159	0.000433767	0.00292196	CD247	XP_005017667.3 T-cell surface glycoprotein CD3 zeta chain [Anas platyrhynchos]
ENSAPLG00020012759	116.726	48.6277	-1.26328	0.000435572	0.00293012	SLC7A5	XP_032051252.1 large neutral amino acids transporter small subunit 1 [Aythya fuligula]
ENSAPLG00020016120	21.97	62.4797	1.50785	0.000438111	0.00294366	CASS4	XP_012960836.3 cas scaffolding protein family member 4 isoform X3 [Anas platyrhynchos]
ENSAPLG00020008813	1.45733	5.45333	1.90381	0.000438212	0.00294366	RHPN2	XP_027322856.1 rhophilin-2 [Anas platyrhynchos]
ENSAPLG00020013119	19.1013	40.1477	1.07164	0.000438379	0.00294366	HIVEP2	XP_038031754.1 transcription factor HIVEP2 [Anas platyrhynchos]
ENSAPLG00020013781	0.265667	5.098	4.26224	0.000439461	0.00294692	GPR55	XP_012963273.1 G-protein coupled receptor 55 [Anas platyrhynchos]
ENSAPLG00020003700	15.7333	6.70733	-1.23001	0.000439679	0.00294705	NAGPA	XP_027325265.2 N-acetylglucosamine-1-phosphodiester alpha-N-acetylglucosaminidase [Anas platyrhynchos]
ENSAPLG00020003625	85.521	40.417	-1.08132	0.000440094	0.00294759	SLC44A1	XP_038025980.1 choline transporter-like protein 1 [Anas platyrhynchos]
ENSAPLG00020003564	9.04533	3.39533	-1.41362	0.000440158	0.00294759	TRIM36	XP_038026932.1 E3 ubiquitin-protein ligase TRIM36 isoform X1 [Anas platyrhynchos]
ENSAPLG00020008374	1.52133	6.409	2.07476	0.000440427	0.00294805	ESRRG	XP_027309532.1 estrogen-related receptor gamma isoform X2 [Anas platyrhynchos]
ENSAPLG00020009519	12.9737	5.95733	-1.12285	0.000442061	0.00295766	DHFR	XP_038026245.1 dihydrofolate reductase isoform X1 [Anas platyrhynchos]
ENSAPLG00020012133	3.32267	1.09	-1.60801	0.000445834	0.00298021	Shank3	XP_040400699.1 SH3 and multiple ankyrin repeat domains protein 3 [Cygnus olor]
ENSAPLG00020001111	11.8387	24.6323	1.05705	0.000446843	0.0029856	PPP1R3B	XP_027312215.1 protein phosphatase 1 regulatory subunit 3B isoform X1 [Anas platyrhynchos]
MSTRG.20647	21.6057	50.6547	1.22929	0.000448902	0.00299531	Zfp36	XP_038025295.1 taxid=8839 mRNA decay activator protein ZFP36-like [Anas platyrhynchos]
ENSAPLG00020001703	5.65667	14.839	1.39137	0.000450966	0.00300637	LIPT1	XP_021123716.1 lipoyltransferase 1, mitochondrial [Anas platyrhynchos]
MSTRG.6034	13.7843	27.589	1.00106	0.000454699	0.00302989	ADCY9	XP_032053379.1 taxid=219594 adenylate cyclase type 9 [Aythya fuligula]
ENSAPLG00020012610	14.1457	4.17333	-1.76109	0.000457494	0.00304715	GPR63	XP_027310628.1 probable G-protein coupled receptor 63 [Anas platyrhynchos]
ENSAPLG00020003454	5.30033	1.35067	-1.97241	0.000463466	0.00308415	Mettl26	XP_027324759.2 methyltransferase-like 26 isoform X1 [Anas platyrhynchos]
ENSAPLG00020012147	3.84967	10.5953	1.46062	0.000467561	0.00311	--	PKU41653.1 rna-directed dna polymerase from mobile element jockey-like [Limosa lapponica baueri]
MSTRG.819	0.02	0.855	5.41785	0.000467812	0.00311028	--	-
ENSAPLG00020013587	0.134667	3.85967	4.84101	0.000470736	0.00312832	Ubxn11	XP_027299683.2 UBX domain-containing protein 11 isoform X3 [Anas platyrhynchos]
ENSAPLG00020001155	0.195	6.24933	5.00216	0.000474824	0.00315407	CABCOCO1	XP_013029309.1 PREDICTED: uncharacterized protein C10orf107 homolog isoform X4 [Anser cygnoides domesticus]
ENSAPLG00020005937	86.2607	40.8597	-1.07803	0.000477243	0.00316872	galc	XP_027314270.2 galactocerebrosidase isoform X1 [Anas platyrhynchos]
MSTRG.11325	0.242667	4.84167	4.31846	0.000481311	0.00319429	--	EOB04369.1 taxid=8839 hypothetical protein Anapl_08902 [Anas platyrhynchos]
ENSAPLG00020015194	0.0293333	0.682333	4.53986	0.000486104	0.00322177	PLCH1	XP_027320345.2 LOW QUALITY PROTEIN: 1-phosphatidylinositol 4,5-bisphosphate phosphodiesterase eta-1 [Anas platyrhynchos]
ENSAPLG00020001424	2.87633	0.0613333	-5.55142	0.000487384	0.00322736	VSNL1	XP_030346923.1 visinin-like protein 1 isoform X1 [Strigops habroptila]
ENSAPLG00020013627	0.230333	1.985	3.10734	0.000496916	0.00328755	ARHGAP40	XP_005011739.2 rho GTPase-activating protein 40 isoform X3 [Anas platyrhynchos]
ENSAPLG00020013910	0.542667	4.704	3.11575	0.000497638	0.00328939	CYP2C19	XP_027315867.1 cytochrome P450 2C9 [Anas platyrhynchos]
MSTRG.12482	0.067	2.514	5.22968	0.00051032	0.00336421	--	XP_009893504.1 taxid=50402 PREDICTED: Krueppel-like factor 2 [Charadrius vociferus]
ENSAPLG00020017490	1.109	5.87833	2.40615	0.000514871	0.00339119	IL23R	XP_032048107.1 interleukin-23 receptor [Aythya fuligula]
ENSAPLG00020014825	2.578	9.545	1.88849	0.000515629	0.00339332	Eps8	XP_005017140.1 epidermal growth factor receptor kinase substrate 8 isoform X1 [Anas platyrhynchos]
ENSAPLG00020005294	2.21933	7.167	1.69124	0.000519427	0.00341474	VOPP1	XP_027307119.1 vesicular, overexpressed in cancer, prosurvival protein 1 [Anas platyrhynchos]
ENSAPLG00020002383	16.1223	5.75433	-1.48634	0.000519599	0.00341474	NKD1	XP_035399096.1 protein naked cuticle homolog 1 isoform X1 [Cygnus atratus]
ENSAPLG00020006846	88.628	193.629	1.12746	0.000534255	0.00349864	CCR5	EOB03431.1 C-C chemokine receptor type 5, partial [Anas platyrhynchos]
ENSAPLG00020016025	0.145333	2.35533	4.01849	0.00053742	0.00351626	Edn1	XP_027307277.1 endothelin-1 [Anas platyrhynchos]
ENSAPLG00020013068	0.0853333	1.775	4.37857	0.000539005	0.00352507	SIRPB1	XP_027329063.1 signal-regulatory protein beta-1-like [Anas platyrhynchos]
ENSAPLG00020004428	5.98033	18.6793	1.64315	0.000539805	0.00352874	H1-2	XP_032064126.1 histone H1.10-like [Aythya fuligula]
ENSAPLG00020004125	17.7953	8.154	-1.12592	0.000541269	0.00353675	ANKRD44	RLW00957.1 hypothetical protein DV515_00008395, partial [Chloebia gouldiae]
ENSAPLG00020006167	1.47733	0.1	-3.88492	0.000541639	0.00353761	FBLN1	XP_027307724.1 fibulin-1 isoform X3 [Anas platyrhynchos]
MSTRG.131	0.220667	2.50333	3.50391	0.000544521	0.00355487	--	XP_050564026.1 taxid=8868 uncharacterized protein LOC118249468 [Cygnus atratus]
ENSAPLG00020008751	5.86867	12.0897	1.04267	0.000546966	0.00356925	GBA2	XP_038026490.1 non-lysosomal glucosylceramidase [Anas platyrhynchos]
ENSAPLG00020000242	18.92	37.8497	1.00037	0.000549862	0.00358657	Tbl1x	XP_013046962.1 PREDICTED: F-box-like/WD repeat-containing protein TBL1X [Anser cygnoides domesticus]
MSTRG.4503	0.679	3.99767	2.55767	0.000550778	0.00359097	--	-
ENSAPLG00020011916	15.9347	34.0997	1.09759	0.000562976	0.00366243	VPS37B	EOB03699.1 Vacuolar protein sorting-associated protein 37B, partial [Anas platyrhynchos]
ENSAPLG00020012406	5.50567	1.15067	-2.25845	0.000568671	0.00369624	PEX11G	XP_027328232.2 peroxisomal membrane protein 11C [Anas platyrhynchos]
ENSAPLG00020016803	16.043	6.313	-1.34555	0.00057463	0.00373169	HPS4	XP_038043440.1 Hermansky-Pudlak syndrome 4 protein [Anas platyrhynchos]
ENSAPLG00020000397	0.001	1.96	10.9366	0.00057697	0.00374525	SERPINB4	XP_038030984.1 serpin B4 isoform X4 [Anas platyrhynchos]
ENSAPLG00020017228	5.38967	1.767	-1.60889	0.000579438	0.00375962	MMACHC	XP_027319012.1 cyanocobalamin reductase / alkylcobalamin dealkylase isoform X2 [Anas platyrhynchos]
MSTRG.22018	0.136667	1.956	3.83917	0.000580272	0.00376339	--	-
ENSAPLG00020004084	0.142	1.69067	3.57363	0.000582035	0.00377025	CHRNB3	XP_038026639.1 neuronal acetylcholine receptor subunit beta-3 isoform X1 [Anas platyrhynchos]
ENSAPLG00020009845	6.49933	1.37567	-2.24016	0.000582095	0.00377025	BEAN1	XP_027322555.1 protein BEAN1 [Anas platyrhynchos]
ENSAPLG00020007387	0.001	1.22533	10.259	0.000582662	0.00377228	TMEM233	XP_038043611.1 transmembrane protein 233 isoform X3 [Anas platyrhynchos]
ENSAPLG00020006781	49.001	24.4843	-1.00095	0.000593952	0.00384202	Eif4ebp2	XP_027316311.2 eukaryotic translation initiation factor 4E-binding protein 2 [Anas platyrhynchos]
ENSAPLG00020011878	33.1727	16.503	-1.00727	0.000596111	0.00385262	SEC61G	KAB0357033.1 hypothetical protein FD754_001189 [Muntiacus muntjak]
ENSAPLG00020015304	2.084	9.34833	2.16535	0.000602402	0.00388653	CD3D	XP_027299978.1 T-cell surface glycoprotein CD3 delta chain [Anas platyrhynchos]
ENSAPLG00020000272	15.14	4.46167	-1.76271	0.000602408	0.00388653	PIGH	XP_027313787.2 phosphatidylinositol N-acetylglucosaminyltransferase subunit H [Anas platyrhynchos]
ENSAPLG00020012416	7.541	16.884	1.16283	0.000605595	0.00390199	SLC41A1	XP_005025150.1 solute carrier family 41 member 3 isoform X1 [Anas platyrhynchos]
MSTRG.12826	0.175667	2.10533	3.58314	0.000613977	0.00394672	--	XP_038033286.1 taxid=8839 uncharacterized protein LOC119716509 [Anas platyrhynchos]
ENSAPLG00020015875	0.001	0.649	9.34207	0.000619635	0.00397713	MOV10L1	XP_005020914.1 RNA helicase Mov10l1 isoform X1 [Anas platyrhynchos]
ENSAPLG00020001718	0.152	1.35067	3.15153	0.000619673	0.00397713	pol	RMC03475.1 hypothetical protein DUI87_20674 [Hirundo rustica rustica]
ENSAPLG00020015965	0.283	2.43367	3.10426	0.000630831	0.00404349	VCAM1	XP_005018814.3 vascular cell adhesion protein 1 isoform X2 [Anas platyrhynchos]
ENSAPLG00020004496	646.532	1293.1	1.00004	0.000640264	0.00409509	CLDN5	XP_032055141.1 claudin-5 [Aythya fuligula]
ENSAPLG00020010690	0.062	7.04167	6.8275	0.000641244	0.00409959	RBPMS2	NP_990200.1 RNA-binding protein with multiple splicing 2 [Gallus gallus]
ENSAPLG00020004769	5.057	1.032	-2.29284	0.000642308	0.00410462	DYNC2LI1	XP_027309917.1 cytoplasmic dynein 2 light intermediate chain 1 isoform X2 [Anas platyrhynchos]
ENSAPLG00020001149	0.0936667	1.92567	4.36168	0.000645475	0.0041213	PRTFDC1	XP_027306425.1 phosphoribosyltransferase domain-containing protein 1 isoform X1 [Anas platyrhynchos]
ENSAPLG00020006034	5.069	15.26	1.58998	0.000647265	0.00413095	CD28	XP_012952396.1 T-cell-specific surface glycoprotein CD28 homolog [Anas platyrhynchos]
ENSAPLG00020013313	2.96267	1.15933	-1.3536	0.000648683	0.00413296	SPHKAP	XP_027320411.2 A-kinase anchor protein SPHKAP isoform X9 [Anas platyrhynchos]
ENSAPLG00020004212	1.989	8.08167	2.02261	0.000649889	0.004137	Sorbs3	XP_015504336.1 vinexin isoform X4 [Parus major]
ENSAPLG00020016571	0.0393333	1.68967	5.42484	0.000653082	0.00415197	Clba1	XP_012960571.3 uncharacterized protein CLBA1 isoform X1 [Anas platyrhynchos]
ENSAPLG00020017597	15.7507	6.028	-1.38566	0.000654299	0.00415615	RCJMB04_2g23	XP_032045231.1 protein C15orf41 homolog isoform X1 [Aythya fuligula]
ENSAPLG00020012477	21.0703	7.18733	-1.55168	0.00065547	0.0041618	PM20D2	XP_027310711.1 peptidase M20 domain-containing protein 2 [Anas platyrhynchos]
MSTRG.9383	0.043	1.789	5.37867	0.000657366	0.00417205	--	-
MSTRG.10989	0.0453333	2.65833	5.87381	0.000658494	0.00417742	--	-
ENSAPLG00020007692	0.940667	3.94567	2.06851	0.000659608	0.00418269	RUSC1	XP_038023675.1 RUN and SH3 domain-containing protein 1 [Anas platyrhynchos]
ENSAPLG00020012203	3.515	1.305	-1.42947	0.000669094	0.00423922	--	XP_038021836.1 coiled-coil domain containing 92B isoform X2 [Anas platyrhynchos]
ENSAPLG00020007079	4.61767	29.288	2.66507	0.00066996	0.00423927	Fn1	XP_035187813.1 fibronectin isoform X1 [Oxyura jamaicensis]
ENSAPLG00020007622	0.0713333	1.56933	4.45943	0.000671265	0.0042441	Golph3	XP_038025359.1 Golgi phosphoprotein 3 [Anas platyrhynchos]
ENSAPLG00020017111	34.2177	172.997	2.33793	0.00067173	0.00424502	IL1B	XP_038022794.1 interleukin-1 beta-like isoform X1 [Anas platyrhynchos]
other organism;GO:0098609//cell-cell adhesion;GO:0098771//inorganic ion homeostasis;GO:0099177//regulation of trans-synaptic signaling;GO:0104004//cellular response to environmental stimulus;GO:1900076//regulation of cellular response to insulin stimulus;GO:1900077//negative regulation of cellular response to insulin stimulus;GO:1900744//regulation of p38MAPK cascade;GO:1900745//positive regulati…
ENSAPLG00020001184	16.9087	38.9917	1.2054	0.000673292	0.00425308	CAMK1D	XP_027316350.1 calcium/calmodulin-dependent protein kinase type 1D isoform X1 [Anas platyrhynchos]
MSTRG.5319	0.191667	4.13533	4.43133	0.000679812	0.00429243	--	-
ENSAPLG00020000672	21.5563	8.61767	-1.32274	0.000696022	0.00438731	--	XP_021130922.2 granulocyte-macrophage colony-stimulating factor receptor subunit alpha isoform X1 [Anas platyrhynchos]
ENSAPLG00020013203	13.1663	32.66	1.31067	0.000710604	0.00446782	ETS1	XP_005019707.4 protein C-ets-1 isoform X2 [Anas platyrhynchos]
ENSAPLG00020004962	8.051	1.547	-2.37969	0.000712997	0.00448096	Rab28	XP_032042658.1 ras-related protein Rab-28 isoform X2 [Aythya fuligula]
ENSAPLG00020012744	0.0633333	2.91567	5.52472	0.000719352	0.00451707	CLEC2L	XP_032062146.1 C-type lectin domain family 2 member L-like [Aythya fuligula]
ENSAPLG00020013890	13.883	34.952	1.33206	0.000722337	0.00453197	BIN1	EOB02761.1 Myc box-dependent-interacting protein 1, partial [Anas platyrhynchos]
ENSAPLG00020016053	0.577333	2.09533	1.8597	0.000726559	0.00455653	Cntn4	XP_032049722.1 contactin-4 isoform X1 [Aythya fuligula]
ENSAPLG00020005243	23.2753	8.66367	-1.42575	0.000734924	0.00460509	Txnl4b	XP_005009750.1 thioredoxin-like protein 4B [Anas platyrhynchos]
ENSAPLG00020005128	4.42067	18.9067	2.09656	0.000744438	0.00466076	PDLIM1	XP_032047576.1 PDZ and LIM domain protein 1 [Aythya fuligula]
ENSAPLG00020018224	0.418667	1.58167	1.91757	0.000752134	0.00470497	SETBP1	XP_038025680.1 SET-binding protein isoform X1 [Anas platyrhynchos]
ENSAPLG00020005885	0.0873333	3.45767	5.30712	0.000757578	0.00473502	--	XP_027310771.1 F-box only protein 21 isoform X2 [Anas platyrhynchos]
ENSAPLG00020002341	0.269	2.19267	3.02701	0.000760945	0.00475406	S1PR3	XP_027302145.2 sphingosine 1-phosphate receptor 3 [Anas platyrhynchos]
MSTRG.14424	0.001	0.773	9.59432	0.000762718	0.00476279	--	-
ENSAPLG00020014932	9.24833	26.1773	1.50105	0.000765986	0.00477749	tcf3	XP_038024970.1 transcription factor E2-alpha isoform X10 [Anas platyrhynchos]
ENSAPLG00020005114	19.7707	41.5787	1.07248	0.000766931	0.00478137	BAG5	XP_027313836.2 BAG family molecular chaperone regulator 5 [Anas platyrhynchos]
ENSAPLG00020013952	0.185	1.223	2.72483	0.000769972	0.00479428	Mtcl1	XP_027307837.2 microtubule cross-linking factor 1 isoform X3 [Anas platyrhynchos]
MSTRG.609	6.63733	2.794	-1.24827	0.000772218	0.00480624	--	-
ENSAPLG00020014423	0.001	2.156	11.0741	0.000775729	0.00482405	Olfr49	XP_038024504.1 olfactory receptor 49-like [Anas platyrhynchos]
ENSAPLG00020015972	1.326	4.23033	1.67369	0.000777076	0.00482837	Cd38	XP_035180716.1 ADP-ribosyl cyclase/cyclic ADP-ribose hydrolase 1-like isoform X3 [Oxyura jamaicensis]
ENSAPLG00020012779	53.7727	115	1.09669	0.000779483	0.00484129	CIDEC	XP_027321607.2 cell death activator CIDE-3 [Anas platyrhynchos]
MSTRG.2655	2.997	0.13	-4.52694	0.000782001	0.00485489	--	-
ENSAPLG00020000189	8.12667	2.42967	-1.74191	0.000790416	0.00489483	AADAT	XP_027312218.1 kynurenine/alpha-aminoadipate aminotransferase, mitochondrial isoform X1 [Anas platyrhynchos]
ENSAPLG00020006651	10.0067	2.071	-2.27256	0.00079214	0.00490346	RAC3	XP_002197173.1 ras-related C3 botulinum toxin substrate 3 [Taeniopygia guttata]
MSTRG.9854	9.69733	4.29333	-1.17549	0.000793986	0.00491283	Abcb8	XP_038029588.1 taxid=8839 LOW QUALITY PROTEIN: mitochondrial potassium channel ATP-binding subunit [Anas platyrhynchos]
MSTRG.1771	6.15467	13.572	1.14088	0.000803468	0.00496114	CRYBG3	XP_038039795.1 taxid=8839 very large A-kinase anchor protein isoform X1 [Anas platyrhynchos]
[truncated: 521 more rows]
