# Supplementary material
Source: Research Square preprint supplement (doi:10.21203/rs.3.rs-9362542/v1)
Supplement: Supplementary file 4 [file bbde4eb980ab6152a83b6418.xlsx]

## Sheet: T12-vs-T24.filter.annot
id	T12_mean	T24_mean	log2(fc)	PValue	FDR	Symbol	Description
ENSAPLG00020008429	555.122	91.634	-2.59885	4.72919e-21	7.13683e-17	IFNK	ANQ45216.1 IFN-kappa [Anas platyrhynchos]
ENSAPLG00020018289	1958.78	75.2	-4.70308	1.00355e-19	5.04818e-16	IFN	XP_038025742.1 interferon [Anas platyrhynchos]
ENSAPLG00020018290	1958.78	75.2	-4.70308	1.00355e-19	5.04818e-16	IFN	XP_038025742.1 interferon [Anas platyrhynchos]
ENSAPLG00020018291	184.979	5.07333	-5.18828	2.61305e-19	9.85839e-16	IFN	XP_038025743.1 interferon-like [Anas platyrhynchos]
ENSAPLG00020007391	49.1073	3.04833	-4.00985	1.07832e-16	3.2546e-13	NEUROD1	XP_032046455.1 neurogenic differentiation factor 1 [Aythya fuligula]
ENSAPLG00020004292	142.795	17.1937	-3.05399	8.33459e-16	2.09629e-12	NKX6-1	XP_038034760.1 homeobox protein Nkx-6.1-like isoform X1 [Anas platyrhynchos]
ENSAPLG00020004839	28.1927	2.992	-3.23614	1.08347e-15	2.33581e-12	AMY2A	XP_027318374.1 pancreatic alpha-amylase [Anas platyrhynchos]
ENSAPLG00020016376	3296.05	586.079	-2.49157	1.23437e-14	2.32848e-11	CCL4	XP_027301799.1 C-C motif chemokine 4-like [Anas platyrhynchos]
ENSAPLG00020007956	669.031	81.1933	-3.04264	2.60224e-14	4.36338e-11	CTSG	XP_012954946.2 mast cell protease 1A [Anas platyrhynchos]
ENSAPLG00020010357	234.225	35.943	-2.70411	1.26454e-13	1.90832e-10	GLRX	XP_027302747.1 glutaredoxin-1 [Anas platyrhynchos]
ENSAPLG00020011550	154.736	26.8463	-2.52701	2.21262e-13	3.03551e-10	LY86	XP_005010761.3 lymphocyte antigen 86 isoform X1 [Anas platyrhynchos]
MSTRG.3557	10.6723	0.695667	-3.93934	1.00692e-12	1.26628e-09	--	-
ENSAPLG00020004665	9.46833	1.13567	-3.05957	4.00531e-12	4.64955e-09	RAB26	XP_005509151.1 ras-related protein Rab-26 isoform X2 [Columba livia]
ENSAPLG00020000355	62.0627	15.0547	-2.04351	1.67621e-11	1.80683e-08	liph-a	XP_005026096.3 lipase member I [Anas platyrhynchos]
ENSAPLG00020018285	1494.51	154.988	-3.26945	2.93657e-11	2.95439e-08	IFN	NP_001297756.2 interferon-like precursor [Anas platyrhynchos]
MSTRG.1796	12.7073	45.793	1.84947	1.23029e-10	1.14589e-07	IGSF3	XP_027305160.2 taxid=8839 immunoglobulin superfamily member 3 isoform X2 [Anas platyrhynchos]
ENSAPLG00020008828	356.364	78.4803	-2.18295	1.29084e-10	1.14589e-07	--	EOA95585.1 hypothetical protein Anapl_12933, partial [Anas platyrhynchos]
ENSAPLG00020014357	423.588	128.446	-1.72149	1.92232e-10	1.61165e-07	rasgef1a	XP_027315819.1 ras-GEF domain-containing family member 1A isoform X3 [Anas platyrhynchos]
MSTRG.3556	7.42167	0.637667	-3.54087	3.5323e-10	2.80558e-07	--	-
ENSAPLG00020011541	42.843	8.468	-2.33897	3.85836e-10	2.91132e-07	KIT	XP_038034614.1 mast/stem cell growth factor receptor Kit isoform X1 [Anas platyrhynchos]
ENSAPLG00020002434	0.115333	10.18	6.46378	4.77065e-10	3.42828e-07	Krt75	XP_040395683.1 keratin, type II cytoskeletal 5-like [Cygnus olor]
ENSAPLG00020004409	15.826	2.19567	-2.84957	6.57639e-10	4.5111e-07	TLR2-2	XP_038033713.1 toll-like receptor 2 isoform X1 [Anas platyrhynchos]
ENSAPLG00020004416	41.4667	11.805	-1.81255	7.06706e-10	4.63691e-07	TLR2-1	XP_005021002.3 toll-like receptor 2 type-1 [Anas platyrhynchos]
ENSAPLG00020012399	50.7813	12.075	-2.07228	8.93586e-10	5.40322e-07	NR4A2	XP_035188095.1 nuclear receptor subfamily 4 group A member 2 isoform X3 [Oxyura jamaicensis]
ENSAPLG00020013952	7.302	1.223	-2.57787	8.95106e-10	5.40322e-07	Mtcl1	XP_027307837.2 microtubule cross-linking factor 1 isoform X3 [Anas platyrhynchos]
ENSAPLG00020009946	2.08167	21.214	3.34921	1.64732e-09	9.56143e-07	HPGD	XP_005027515.1 15-hydroxyprostaglandin dehydrogenase [NAD(+)] [Anas platyrhynchos]
ENSAPLG00020003333	1.24633	9.2	2.88394	1.83406e-09	1.0251e-06	LOXL2	XP_038022754.1 lysyl oxidase homolog 2 [Anas platyrhynchos]
MSTRG.17742	0.386333	5.40467	3.80629	2.26958e-09	1.22322e-06	NAV2	XP_027314738.2 taxid=8839 neuron navigator 2 isoform X6 [Anas platyrhynchos]
ENSAPLG00020012298	64.7263	19.052	-1.76441	2.66761e-09	1.38817e-06	SLBP	XP_027311503.1 uncharacterized protein LOC101791777 [Anas platyrhynchos]
ENSAPLG00020005359	15.5957	1.35167	-3.52833	3.24209e-09	1.63088e-06	HOXD9	XP_035187792.1 homeobox protein Hox-D9 isoform X2 [Oxyura jamaicensis]
ENSAPLG00020012566	20.861	5.24867	-1.99079	8.28973e-09	4.0355e-06	PAK3	XP_027321155.1 serine/threonine-protein kinase PAK 3 isoform X1 [Anas platyrhynchos]
ENSAPLG00020017691	45.172	6.272	-2.84843	8.83666e-09	4.16732e-06	HDC	XP_012961841.3 histidine decarboxylase [Anas platyrhynchos]
MSTRG.5895	6.24	0.386667	-4.01238	1.04666e-08	4.7864e-06	--	KQL61521.1 taxid=12930 hypothetical protein AAES_13765 [Amazona aestiva]
MSTRG.7230	152.541	35.328	-2.11032	1.15288e-08	5.11708e-06	--	KAI6075684.1 taxid=8832 hypothetical protein LUU34_00273700 [Aix galericulata]
ENSAPLG00020010185	10.9243	38.5763	1.82017	1.30959e-08	5.64658e-06	loxl3b	XP_038034469.1 lysyl oxidase homolog 3 isoform X5 [Anas platyrhynchos]
ENSAPLG00020010446	50.4	10.1377	-2.3137	1.64913e-08	6.91305e-06	GATA2	NP_001003797.1 GATA-binding factor 2 isoform 2 [Gallus gallus]
MSTRG.4795	13.207	0.637333	-4.37311	3.21837e-08	1.29727e-05	--	EOB00808.1 taxid=8839 hypothetical protein Anapl_09822 [Anas platyrhynchos]
ENSAPLG00020017660	153.056	573.965	1.9069	3.26661e-08	1.29727e-05	EGLN3	XP_013796419.1 PREDICTED: egl nine homolog 3 [Apteryx mantelli mantelli]
ENSAPLG00020011545	16.6023	3.18933	-2.38006	3.37515e-08	1.30601e-05	F13a1	XP_005010762.1 coagulation factor XIII A chain [Anas platyrhynchos]
ENSAPLG00020002481	20.5633	73.1543	1.83087	4.72894e-08	1.78411e-05	ENO2	PKK30609.1 enolase 2 (gamma, neuronal), partial [Columba livia]
ENSAPLG00020015748	32.5643	4.97633	-2.71014	5.7721e-08	2.12456e-05	ISL2	XP_027321411.1 insulin gene enhancer protein ISL-2 [Anas platyrhynchos]
ENSAPLG00020008862	126.327	29.4943	-2.09865	9.8045e-08	3.52285e-05	Nr4a3	XP_027307663.1 LOW QUALITY PROTEIN: nuclear receptor subfamily 4 group A member 3 [Anas platyrhynchos]
ENSAPLG00020015873	168.563	61.5233	-1.45409	1.12346e-07	3.94281e-05	IL17REL	XP_038029117.1 putative interleukin-17 receptor E-like isoform X2 [Anas platyrhynchos]
ENSAPLG00020009206	1.60867	7.785	2.27483	1.34579e-07	4.61577e-05	MAP1B	XP_038025844.1 microtubule-associated protein 1B [Anas platyrhynchos]
ENSAPLG00020015265	536.492	148.045	-1.85753	1.38645e-07	4.64954e-05	--	XP_005025829.2 endonuclease domain-containing 1 protein [Anas platyrhynchos]
ENSAPLG00020018130	6.51467	36.2387	2.47577	1.61739e-07	5.30611e-05	MXRA8	XP_032776208.1 matrix remodeling-associated protein 8 isoform X1 [Strigops habroptila]
ENSAPLG00020007967	27.567	7.934	-1.79682	1.67349e-07	5.37331e-05	Gzmg	XP_005019579.2 granzyme G [Anas platyrhynchos]
MSTRG.15865	0.748	4.93033	2.72058	1.85997e-07	5.84768e-05	--	-
MSTRG.1888	3.717	0.589667	-2.65617	2.3353e-07	7.1587e-05	--	-
ENSAPLG00020014542	13.0717	75.355	2.52726	2.37185e-07	7.1587e-05	SERINC2	XP_038023340.1 serine incorporator 2 isoform X1 [Anas platyrhynchos]
MSTRG.7522	9.20667	0.912	-3.33557	2.53037e-07	7.48743e-05	--	XP_050567617.1 taxid=8868 LOW QUALITY PROTEIN: growth factor receptor-bound protein 14 [Cygnus atratus]
ENSAPLG00020015907	186.661	45.2893	-2.04317	2.63693e-07	7.65267e-05	CHIA	XP_038024147.1 acidic mammalian chitinase isoform X1 [Anas platyrhynchos]
ENSAPLG00020000626	25.516	6.81233	-1.90518	3.1931e-07	9.09189e-05	Mrgprd	XP_027315216.1 proto-oncogene Mas-like [Anas platyrhynchos]
ENSAPLG00020012047	400.504	166.33	-1.26777	3.40572e-07	9.51774e-05	CD83	EOA98250.1 CD83 antigen [Anas platyrhynchos]
ENSAPLG00020012078	4.06133	23.1307	2.50978	4.53338e-07	0.00012231	OSTN	XP_038039780.1 osteocrin isoform X1 [Anas platyrhynchos]
ENSAPLG00020017714	5.09533	18.2433	1.84012	4.56801e-07	0.00012231	ADAMTSL3	XP_027322240.1 ADAMTS-like protein 3 isoform X1 [Anas platyrhynchos]
ENSAPLG00020013620	73.2497	184.203	1.3304	4.61975e-07	0.00012231	FBXO32	XP_032037440.1 F-box only protein 32 [Aythya fuligula]
ENSAPLG00020018091	9.62833	26.7663	1.47506	4.90195e-07	0.000127544	H6PD	XP_005015486.3 GDH/6PGL endoplasmic bifunctional protein [Anas platyrhynchos]
ENSAPLG00020001305	103.31	318.352	1.62364	5.2415e-07	0.000134067	Sdc1	XP_027311103.1 syndecan-1 [Anas platyrhynchos]
ENSAPLG00020014921	8.07933	1.491	-2.43796	5.75675e-07	0.000144792	CREB3L1	XP_027315064.1 cyclic AMP-responsive element-binding protein 3-like protein 1 isoform X1 [Anas platyrhynchos]
ENSAPLG00020017845	36.5727	9.92767	-1.88124	6.19417e-07	0.00015324	MLPH	XP_038038182.1 melanophilin isoform X4 [Anas platyrhynchos]
ENSAPLG00020013933	10.6347	2.161	-2.299	6.78843e-07	0.000165233	ECE1	XP_027298934.2 LOW QUALITY PROTEIN: endothelin-converting enzyme 1 [Anas platyrhynchos]
ENSAPLG00020013562	115.19	276.553	1.26354	7.28049e-07	0.000174397	Scd1	XP_027315890.1 acyl-CoA desaturase [Anas platyrhynchos]
ENSAPLG00020015876	10.6163	36.6603	1.78793	8.56007e-07	0.000201844	Panx2	XP_027314162.1 pannexin-2 isoform X1 [Anas platyrhynchos]
ENSAPLG00020007756	173.043	545.219	1.65571	9.82642e-07	0.000228139	ATP1B1	NP_001297315.1 sodium/potassium-transporting ATPase subunit beta-1 [Anas platyrhynchos]
ENSAPLG00020000602	17.1977	4.64667	-1.88794	1.05313e-06	0.000240799	PLXDC2	XP_027306463.1 plexin domain-containing protein 2 isoform X2 [Anas platyrhynchos]
ENSAPLG00020016341	3.48367	18.3007	2.39322	1.07448e-06	0.000242015	Glis1	XP_027318676.2 zinc finger protein GLIS1 isoform X1 [Anas platyrhynchos]
ENSAPLG00020003910	352.492	78.8237	-2.16089	1.30162e-06	0.000288863	H2-Ab1	ABF47548.1 MHC class II antigen beta chain [Cairina moschata]
ENSAPLG00020011691	175.02	47.5967	-1.87859	1.35092e-06	0.000293972	MARCKSL1	XP_032058316.1 MARCKS-related protein [Aythya fuligula]
ENSAPLG00020003174	10.645	1.39433	-2.93253	1.37533e-06	0.000293972	EPB41L4A	XP_038026672.1 band 4.1-like protein 4A isoform X1 [Anas platyrhynchos]
ENSAPLG00020003263	111.912	13.7693	-3.02283	1.38308e-06	0.000293972	H2-Ab1	XP_032061025.1 class II histocompatibility antigen, B-L beta chain-like [Aythya fuligula]
MSTRG.819	4.74433	0.855	-2.47221	1.54599e-06	0.000324034	--	-
MSTRG.8004	87.396	205.321	1.23224	1.87236e-06	0.000387065	--	-
ENSAPLG00020013437	181.103	68.0297	-1.41257	2.01292e-06	0.000410501	ch25h	XP_005029482.1 cholesterol 25-hydroxylase [Anas platyrhynchos]
ENSAPLG00020017569	22.4367	7.94033	-1.49859	2.06574e-06	0.000415655	RASGRP1	XP_027313633.1 RAS guanyl-releasing protein 1 isoform X2 [Anas platyrhynchos]
MSTRG.8584	5.33367	1.07767	-2.30722	2.10479e-06	0.000417939	--	-
ENSAPLG00020005949	51.4863	10.2283	-2.33162	2.29461e-06	0.000441368	SLC18A2	XP_032047681.1 synaptic vesicular amine transporter [Aythya fuligula]
ENSAPLG00020015895	12.279	49.6483	2.01555	2.32064e-06	0.000441368	PPARGC1A	XP_005031720.1 peroxisome proliferator-activated receptor gamma coactivator 1-alpha isoform X3 [Anas platyrhynchos]
ENSAPLG00020007635	111.762	33.4903	-1.73862	2.3244e-06	0.000441368	LCAT	NP_001297299.1 phosphatidylcholine-sterol acyltransferase precursor [Anas platyrhynchos]
ENSAPLG00020007572	1.509	5.403	1.84017	2.33977e-06	0.000441368	CMYA5	XP_038026147.1 cardiomyopathy-associated protein 5 isoform X1 [Anas platyrhynchos]
MSTRG.10198	5.22067	15.1633	1.53828	3.15795e-06	0.000588353	--	EOB04036.1 taxid=8839 hypothetical protein Anapl_04909 [Anas platyrhynchos]
MSTRG.9535	8.05433	1.589	-2.34165	3.46611e-06	0.000637892	--	XP_065430583.1 taxid=8478 LOW QUALITY PROTEIN: HAUS augmin-like complex subunit 5 [Chrysemys picta bellii]
ENSAPLG00020018224	5.035	1.58167	-1.67055	4.7681e-06	0.000866933	SETBP1	XP_038025680.1 SET-binding protein isoform X1 [Anas platyrhynchos]
ENSAPLG00020012003	399.497	145.948	-1.45273	5.12945e-06	0.000921531	FOS	XP_032044440.1 proto-oncogene c-Fos [Aythya fuligula]
ENSAPLG00020000837	32.5287	94.5387	1.53919	5.96893e-06	0.00105973	Drd4	XP_027313903.1 D(4) dopamine receptor [Anas platyrhynchos]
ENSAPLG00020004042	22.7663	2.848	-2.99888	6.04358e-06	0.00106051	H2-Ab1	XP_032061025.1 class II histocompatibility antigen, B-L beta chain-like [Aythya fuligula]
ENSAPLG00020012005	6.87733	1.12333	-2.61406	6.20468e-06	0.00107626	fzd2	XP_027301588.2 frizzled-2 [Anas platyrhynchos]
ENSAPLG00020006607	31.32	8.94033	-1.80868	7.21282e-06	0.00123161	P2rx1	XP_038021872.1 P2X purinoceptor 1 isoform X1 [Anas platyrhynchos]
MSTRG.1981	9.97767	0.868667	-3.52183	7.26352e-06	0.00123161	--	-
ENSAPLG00020000696	17.584	60.597	1.78498	7.43359e-06	0.00124645	PALLD	XP_021127455.3 palladin isoform X2 [Anas platyrhynchos]
ENSAPLG00020001481	142.769	50.0817	-1.51133	9.10049e-06	0.00150918	IL6	XP_027306726.1 interleukin-6 [Anas platyrhynchos]
;GO:2000145//regulation of cell motility;GO:2000147//positive regulation of cell motility;GO:2000377//regulation of reactive oxygen species metabolic process;GO:2000379//positive regulation of reactive oxygen species metabolic process;GO:2000514//regulation of CD4-positive, alpha-beta T cell activation;GO:2000516//positive regulation of CD4-positive, alpha-beta T cell activation;GO:2000551//regul…
ENSAPLG00020013206	269.353	676.873	1.32939	9.21559e-06	0.0015113	Ndrg1	XP_027308532.1 protein NDRG1 [Anas platyrhynchos]
ENSAPLG00020000336	7.92533	1.323	-2.58266	9.31357e-06	0.0015113	CHST1	XP_005014027.1 carbohydrate sulfotransferase 1 [Anas platyrhynchos]
MSTRG.12642	12.7717	35.106	1.45877	9.54866e-06	0.00153297	Prag1	XP_021135085.2 taxid=8839 protein PEAK3 [Anas platyrhynchos]
ENSAPLG00020008241	117.241	32.2173	-1.86357	9.78304e-06	0.00155406	DUSP5	XP_032047195.1 dual specificity protein phosphatase 5 [Aythya fuligula]
ENSAPLG00020006115	24.2187	68.9543	1.50952	1.12802e-05	0.00177322	RAPH1	XP_032045521.1 ras-associated and pleckstrin homology domains-containing protein 1 isoform X3 [Aythya fuligula]
ENSAPLG00020012901	6.63733	0.316667	-4.38957	1.21317e-05	0.00188741	Pax1	XP_027308976.2 paired box protein Pax-1 [Anas platyrhynchos]
MSTRG.13307	13.6057	4.301	-1.66146	1.38291e-05	0.00212504	--	XP_032040349.1 taxid=219594 signal transducer CD24 [Aythya fuligula]
ENSAPLG00020015388	218.656	72.4877	-1.59286	1.39407e-05	0.00212504	--	XP_005008925.1 uncharacterized protein LOC101802072 [Anas platyrhynchos]
MSTRG.7330	160.277	54.79	-1.54858	1.41182e-05	0.00213058	--	XP_038021223.1 taxid=8839 uncharacterized protein LOC106016586 [Anas platyrhynchos]
ENSAPLG00020007042	9.12933	46.4857	2.3482	1.47543e-05	0.00220453	OLFML3	XP_027300934.1 olfactomedin-like protein 3 [Anas platyrhynchos]
ENSAPLG00020005174	19.354	5.411	-1.83866	1.51084e-05	0.00223531	PPBP	XP_032042112.1 interleukin-8-like [Aythya fuligula]
MSTRG.7575	2.91767	13.533	2.21359	1.64175e-05	0.00240541	Col5a1	XP_038021075.1 taxid=8839 LOW QUALITY PROTEIN: collagen alpha-1(I) chain-like [Anas platyrhynchos]
ENSAPLG00020012083	32.0763	77.7507	1.27735	1.66995e-05	0.00242319	CCDC50	XP_027319704.2 coiled-coil domain-containing protein 50 isoform X1 [Anas platyrhynchos]
MSTRG.10435	5.85933	29.7223	2.34274	1.69082e-05	0.00243011	--	XP_035413373.1 taxid=8868 matrix remodeling-associated protein 8 isoform X2 [Cygnus atratus]
MSTRG.9620	7.864	2.09367	-1.90923	1.83998e-05	0.00260846	--	NWZ30868.1 taxid=75869 SETBP protein [Asarcornis scutulata]
ENSAPLG00020015523	3.27833	30.0247	3.19511	1.86588e-05	0.00260846	TAGLN	XP_027300232.1 transgelin [Anas platyrhynchos]
ENSAPLG00020003819	185.927	76.0027	-1.29061	1.86677e-05	0.00260846	LPL	XP_027302192.2 lipoprotein lipase [Anas platyrhynchos]
ENSAPLG00020017669	2.853	10.124	1.82723	2.00598e-05	0.00277728	GFPT2	XP_038042456.1 glutamine--fructose-6-phosphate aminotransferase [isomerizing] 2 isoform X3 [Anas platyrhynchos]
ENSAPLG00020009626	16.2807	4.48133	-1.86116	2.09812e-05	0.00287843	LCA5	XP_027310759.1 lebercilin [Anas platyrhynchos]
ENSAPLG00020007742	2.99367	0.282	-3.40815	2.32522e-05	0.00316125	Havcr1	XP_038042462.1 LOW QUALITY PROTEIN: T-cell immunoglobulin and mucin domain-containing protein 4 [Anas platyrhynchos]
ENSAPLG00020016742	6.37567	22.0333	1.78904	2.66725e-05	0.00359388	NCEH1	XP_027320531.1 neutral cholesterol ester hydrolase 1 [Anas platyrhynchos]
ENSAPLG00020004612	67.4733	159.552	1.24164	2.754e-05	0.00367793	MX	ALF04450.1 Mx [Anas platyrhynchos]
ENSAPLG00020002670	13.4793	3.90367	-1.78785	2.81176e-05	0.00372214	Fam3d	EOA96114.1 Protein FAM3D, partial [Anas platyrhynchos]
ENSAPLG00020011777	81.3663	31.573	-1.36574	3.14264e-05	0.00410981	RNF138	XP_038030868.1 E3 ubiquitin-protein ligase RNF138 isoform X3 [Anas platyrhynchos]
ENSAPLG00020005531	3.37967	13.861	2.03608	3.15909e-05	0.00410981	SLC34A1	XP_038042499.1 sodium-dependent phosphate transport protein 2A isoform X1 [Anas platyrhynchos]
ENSAPLG00020012487	2.25633	0.191333	-3.55982	3.21222e-05	0.00414322	GABRR2	XP_005012420.1 gamma-aminobutyric acid receptor subunit rho-2 isoform X1 [Anas platyrhynchos]
ENSAPLG00020007125	2.29567	0.478667	-2.26182	3.58976e-05	0.00459094	VTG2	XP_005022346.4 vitellogenin-2 isoform X1 [Anas platyrhynchos]
ENSAPLG00020001374	88.3953	29.4933	-1.58358	3.92026e-05	0.00497148	Blk	XP_005030656.1 tyrosine-protein kinase Blk isoform X1 [Anas platyrhynchos]
MSTRG.7331	8.21767	0.376333	-4.44865	4.3543e-05	0.00547589	--	-
ENSAPLG00020015213	3.71967	0.761	-2.2892	4.63772e-05	0.00578412	LEKR1	XP_038039643.1 leucine-, glutamate- and lysine-rich protein 1 isoform X3 [Anas platyrhynchos]
ENSAPLG00020009001	0.948333	0.165667	-2.51711	4.82803e-05	0.00597212	PRUNE2	XP_038026338.1 protein prune homolog 2 isoform X3 [Anas platyrhynchos]
ENSAPLG00020015991	6.85133	0.563	-3.60518	4.90777e-05	0.00602139	FOSB	XP_038028816.1 protein fosB [Anas platyrhynchos]
ENSAPLG00020015988	20.0227	4.56433	-2.13316	5.03185e-05	0.00612384	CX3CR1	XP_005017000.1 CX3C chemokine receptor 1 [Anas platyrhynchos]
ENSAPLG00020008067	32.966	11.721	-1.49188	5.0773e-05	0.00612972	CD86	XP_038029006.1 T-lymphocyte activation antigen CD86 isoform X1 [Anas platyrhynchos]
ENSAPLG00020008066	17.2833	45.737	1.40398	5.23429e-05	0.0062691	Atp8b2	XP_005019480.2 phospholipid-transporting ATPase ID [Anas platyrhynchos]
ENSAPLG00020010511	10.869	33.1977	1.61086	5.37635e-05	0.00633455	COQ8A	XP_038032045.1 atypical kinase COQ8A, mitochondrial [Anas platyrhynchos]
ENSAPLG00020001913	0.0656667	2.28867	5.1232	5.3826e-05	0.00633455	NPAS2	XP_027301840.2 neuronal PAS domain-containing protein 2 isoform X1 [Anas platyrhynchos]
ENSAPLG00020016380	22.562	5.84567	-1.94846	5.41486e-05	0.00633455	Dpep2	XP_038041300.1 dipeptidase 2 [Anas platyrhynchos]
ENSAPLG00020015308	26.361	6.572	-2.004	5.58463e-05	0.00648068	JAML	XP_027299969.2 junctional adhesion molecule-like isoform X1 [Anas platyrhynchos]
ENSAPLG00020012062	7.167	18.7653	1.38863	5.62566e-05	0.00648068	CLDN1	XP_012964010.3 claudin-1 [Anas platyrhynchos]
ENSAPLG00020001118	42.763	16.2173	-1.39883	5.84295e-05	0.00668	LPAR6	XP_032055368.1 lysophosphatidic acid receptor 6 [Aythya fuligula]
ENSAPLG00020005862	0.536667	2.65133	2.30462	6.00854e-05	0.00681766	zdhhc1	XP_035192851.1 palmitoyltransferase ZDHHC1 isoform X3 [Oxyura jamaicensis]
ENSAPLG00020016671	5.13867	30.429	2.56598	6.26092e-05	0.00704698	--	-
ENSAPLG00020013900	10.42	31.4493	1.59367	6.30404e-05	0.00704698	CYP2C19	XP_027316280.2 cytochrome P450 2C9-like [Anas platyrhynchos]
ENSAPLG00020011626	44.3417	13.6163	-1.70332	6.45588e-05	0.00716366	Cd55b	XP_038024478.1 complement receptor type 1 [Anas platyrhynchos]
ENSAPLG00020004248	1.74933	6.60967	1.91777	6.60718e-05	0.00727803	ZDHHC8	XP_027325445.1 palmitoyltransferase ZDHHC8 isoform X1 [Anas platyrhynchos]
ENSAPLG00020011745	3403.89	966.061	-1.817	6.74252e-05	0.00737329	LYZ	XP_005008937.2 lysozyme C [Anas platyrhynchos]
ENSAPLG00020005305	1.50233	5.62167	1.90379	6.98934e-05	0.00754028	Tmem120a	XP_018864113.1 transmembrane protein 120A isoform X1 [Parus major]
ENSAPLG00020005326	8.44933	2.27333	-1.89403	7.06874e-05	0.00754028	KCNK13	XP_035184492.1 potassium channel subfamily K member 13 [Oxyura jamaicensis]
ENSAPLG00020009470	2.02033	0.001	-10.9804	7.12172e-05	0.00754028	GDNF	XP_032062458.1 glial cell line-derived neurotrophic factor isoform X1 [Aythya fuligula]
ENSAPLG00020007017	6.95133	1.10633	-2.6515	7.19024e-05	0.00754028	FOXS1	XP_032054294.1 forkhead box protein S1 [Aythya fuligula]
ENSAPLG00020001865	28.8243	8.076	-1.83557	7.20228e-05	0.00754028	FGL2	XP_005013718.2 fibroleukin [Anas platyrhynchos]
ENSAPLG00020004746	3.39567	16.6767	2.29606	7.21122e-05	0.00754028	DCLK2	XP_038033948.1 serine/threonine-protein kinase DCLK2 isoform X2 [Anas platyrhynchos]
ENSAPLG00020013161	25.1293	78.4873	1.64309	7.30448e-05	0.00754028	SPATS2L	XP_027318073.1 SPATS2-like protein isoform X2 [Anas platyrhynchos]
ENSAPLG00020004736	0.595667	5.78167	3.27891	7.3458e-05	0.00754028	--	XP_035425616.1 palmitoyltransferase ZDHHC21 isoform X1 [Cygnus atratus]
MSTRG.19008	5.97133	2.12067	-1.49354	7.39146e-05	0.00754028	--	KAK2523653.1 taxid=135627 hypothetical protein Q9233_009993 [Columba guinea]
ENSAPLG00020007817	2.28167	0.204667	-3.47874	7.39488e-05	0.00754028	NPR1	XP_027302647.2 atrial natriuretic peptide receptor 1-like [Anas platyrhynchos]
ENSAPLG00020012468	7.18967	1.08367	-2.73	7.51945e-05	0.00761584	NTN4	XP_005025165.1 netrin-4 [Anas platyrhynchos]
ENSAPLG00020000631	66.3597	22.008	-1.59228	7.68548e-05	0.00773211	Mrgprd	XP_027314839.1 proto-oncogene Mas-like [Anas platyrhynchos]
ENSAPLG00020001912	25.8793	11.1563	-1.21394	8.05601e-05	0.00805121	PTK2	XP_038031581.1 focal adhesion kinase 1 isoform X2 [Anas platyrhynchos]
ENSAPLG00020017489	58.1727	22.1187	-1.39508	8.2148e-05	0.00815589	Mknk1	XP_005027427.2 MAP kinase-interacting serine/threonine-protein kinase 1 isoform X1 [Anas platyrhynchos]
MSTRG.10467	1.09767	5.66333	2.36721	8.82488e-05	0.00864781	Plekhn1	XP_027298974.2 taxid=8839 LOW QUALITY PROTEIN: pleckstrin homology domain-containing family N member 1 [Anas platyrhynchos]
MSTRG.20465	10.6267	34.104	1.68225	9.37918e-05	0.00913169	gag-pro-pol	XP_032062684.1 taxid=219594 uncharacterized protein LOC116501274 [Aythya fuligula]
ENSAPLG00020011779	38.5333	17.496	-1.13908	9.55747e-05	0.00924563	ARHGAP15	XP_038037966.1 rho GTPase-activating protein 15 isoform X1 [Anas platyrhynchos]
MSTRG.9915	7.45033	0.235667	-4.98249	9.65421e-05	0.00927973	--	-
ENSAPLG00020010510	3.887	0.598333	-2.69964	0.000111919	0.0106897	Hgfac	XP_005016246.2 hepatocyte growth factor activator [Anas platyrhynchos]
ENSAPLG00020013960	15.6987	4.84533	-1.69597	0.00011406	0.0108224	ACVRL1	XP_035426252.1 serine/threonine-protein kinase receptor R3 [Cygnus atratus]
ENSAPLG00020007387	7.48233	1.22533	-2.61031	0.000115168	0.0108224	TMEM233	XP_038043611.1 transmembrane protein 233 isoform X3 [Anas platyrhynchos]
ENSAPLG00020006995	49.7557	17.984	-1.46815	0.00011546	0.0108224	SPARC	XP_005010591.1 SPARC isoform X1 [Anas platyrhynchos]
ENSAPLG00020015700	55.0793	25.895	-1.08884	0.000118186	0.0110096	PIM1	XP_027300530.2 LOW QUALITY PROTEIN: serine/threonine-protein kinase pim-1 [Anas platyrhynchos]
MSTRG.20441	15.466	50.236	1.69962	0.000126462	0.0117082	ADGRE3	XP_038025264.1 taxid=8839 adhesion G protein-coupled receptor E3-like isoform X1 [Anas platyrhynchos]
ENSAPLG00020011348	3.79233	0.423333	-3.16322	0.000133673	0.0123004	CPM	XP_027311775.2 carboxypeptidase M isoform X1 [Anas platyrhynchos]
ENSAPLG00020008198	29.095	14.3773	-1.01698	0.000136063	0.0124444	SUSD1	XP_038026792.1 sushi domain-containing protein 1 isoform X2 [Anas platyrhynchos]
ENSAPLG00020006002	55.4657	134.123	1.27389	0.000137891	0.0124851	SHTN1	XP_027316108.2 shootin-1 isoform X1 [Anas platyrhynchos]
ENSAPLG00020012676	6.39767	22.9507	1.84292	0.000138162	0.0124851	CRISPLD2	XP_005016593.1 cysteine-rich secretory protein LCCL domain-containing 2 [Anas platyrhynchos]
ENSAPLG00020001087	2.534	0.546667	-2.21268	0.00013958	0.0125381	Brsk2	XP_009672710.1 PREDICTED: serine/threonine-protein kinase BRSK2 isoform X7 [Struthio camelus australis]
ENSAPLG00020014825	3.02033	9.545	1.66004	0.000143144	0.0127822	Eps8	XP_005017140.1 epidermal growth factor receptor kinase substrate 8 isoform X1 [Anas platyrhynchos]
MSTRG.18827	2.16067	8.358	1.95168	0.00014565	0.0129295	--	-
ENSAPLG00020003654	23.302	63.3337	1.44252	0.000147725	0.0130139	ALS2CL	XP_032039233.1 ALS2 C-terminal-like protein isoform X2 [Aythya fuligula]
ENSAPLG00020009964	9.43333	24.8993	1.40027	0.000148326	0.0130139	gag-pol	XP_014810274.1 PREDICTED: uncharacterized protein LOC106895380 [Calidris pugnax]
ENSAPLG00020000937	1.14833	5.489	2.257	0.000149751	0.0130517	Cobl	XP_038029944.1 protein cordon-bleu isoform X10 [Anas platyrhynchos]
ENSAPLG00020005206	14.4127	4.14467	-1.79801	0.00015067	0.0130517	SYTL3	XP_012950795.2 synaptotagmin-like protein 3 [Anas platyrhynchos]
ENSAPLG00020000117	33.501	14.3227	-1.2259	0.000151352	0.0130517	IL18R1	XP_038029172.1 interleukin-18 receptor 1 [Anas platyrhynchos]
ENSAPLG00020016387	19375.6	7855.33	-1.3025	0.000152966	0.0131159	CCL4	XP_038021537.1 C-C motif chemokine 4 homolog isoform X1 [Anas platyrhynchos]
ENSAPLG00020017463	4.24733	0.833667	-2.34901	0.000154635	0.0131842	DNAJC6	EOA93100.1 Putative tyrosine-protein phosphatase auxilin, partial [Anas platyrhynchos]
MSTRG.16837	12.6977	6.13233	-1.05006	0.00015566	0.013197	--	EOB00462.1 taxid=8839 hypothetical protein Anapl_00778 [Anas platyrhynchos]
ENSAPLG00020010945	38.183	15.8747	-1.2662	0.000170358	0.0143624	TACC1	XP_038022826.1 transforming acidic coiled-coil-containing protein 1 isoform X4 [Anas platyrhynchos]
MSTRG.6297	19.6863	6.99433	-1.49294	0.000181346	0.0151198	--	-
MSTRG.20466	16.0327	50.8747	1.66593	0.000187465	0.0155442	env	XP_038041111.1 taxid=8839 uncharacterized protein LOC119718063 [Anas platyrhynchos]
ENSAPLG00020006175	87.9063	275.559	1.64832	0.000189919	0.0156261	Gpd1	XP_027318136.1 glycerol-3-phosphate dehydrogenase [NAD(+)], cytoplasmic [Anas platyrhynchos]
ENSAPLG00020001804	8.801	0.439667	-4.32319	0.00019055	0.0156261	Olig2	XP_027304989.1 oligodendrocyte transcription factor 2 [Anas platyrhynchos]
ENSAPLG00020007031	66.7483	28.8643	-1.20944	0.00019156	0.0156261	IRF4	XP_032054459.1 interferon regulatory factor 4-like [Aythya fuligula]
ENSAPLG00020015161	0.408667	2.293	2.48824	0.000193649	0.0157116	BICC1	XP_027319040.1 protein bicaudal C homolog 1 isoform X1 [Anas platyrhynchos]
ENSAPLG00020001816	0.288333	2.91533	3.33785	0.000197834	0.0159653	POSTN	XP_038030246.1 periostin isoform X3 [Anas platyrhynchos]
ENSAPLG00020004567	8.67267	2.65433	-1.70813	0.000202273	0.0162367	tlcd2	XP_027327932.1 TLC domain-containing protein 2 [Anas platyrhynchos]
MSTRG.5521	1.26567	6.319	2.3198	0.000207071	0.0165339	C5orf47	XP_040429477.1 taxid=8869 uncharacterized protein C5orf47 homolog isoform X2 [Cygnus olor]
ENSAPLG00020001465	3.54067	0.228667	-3.9527	0.00023054	0.018311	Gpr152	XP_038035979.1 probable G-protein coupled receptor 152 [Anas platyrhynchos]
MSTRG.19879	2.54967	10.54	2.04749	0.000235952	0.0185975	--	-
ENSAPLG00020004847	122.967	51.356	-1.25967	0.000236613	0.0185975	GPR183	XP_005020293.3 G-protein coupled receptor 183 [Anas platyrhynchos]
ENSAPLG00020009533	0.348333	3.54433	3.34697	0.000239743	0.018746	DAB2	XP_038026448.1 disabled homolog 2 isoform X1 [Anas platyrhynchos]
ENSAPLG00020009061	0.266	1.23867	2.21929	0.000242502	0.0188639	PDZD2	XP_038026374.1 PDZ domain-containing protein 2 isoform X2 [Anas platyrhynchos]
ENSAPLG00020016741	45.009	16.2137	-1.473	0.000244918	0.0189541	GPR141	XP_032036963.1 probable G-protein coupled receptor 141 [Aythya fuligula]
ENSAPLG00020009045	25.3157	9.621	-1.39577	0.000254775	0.0196164	LIF	XP_038043492.1 leukemia inhibitory factor isoform X1 [Anas platyrhynchos]
ENSAPLG00020017344	12.2813	4.83333	-1.34538	0.000257857	0.0196676	NID2	XP_032043724.1 nidogen-2 isoform X5 [Aythya fuligula]
ENSAPLG00020001943	21.6283	9.57733	-1.17523	0.000258046	0.0196676	TDRD6	XP_012964686.3 tudor domain-containing protein 6 [Anas platyrhynchos]
ENSAPLG00020011466	15.2217	38.981	1.35664	0.000266292	0.020152	MYO10	XP_038029878.1 LOW QUALITY PROTEIN: unconventional myosin-X [Anas platyrhynchos]
ENSAPLG00020002706	48.4657	20.2757	-1.25721	0.000267074	0.020152	MGST2	XP_005022467.1 microsomal glutathione S-transferase 2 [Anas platyrhynchos]
ENSAPLG00020002267	3.144	17.4013	2.46852	0.000275415	0.0205757	AQP1	XP_005012516.1 aquaporin-1 [Anas platyrhynchos]
ENSAPLG00020004642	0.552	2.30733	2.06349	0.000278747	0.020722	PTPN13	XP_038034099.1 tyrosine-protein phosphatase non-receptor type 13 isoform X2 [Anas platyrhynchos]
ENSAPLG00020008331	61.772	17.383	-1.82928	0.000281784	0.0207958	CTSL	XP_038025176.1 procathepsin L-like isoform X1 [Anas platyrhynchos]
ENSAPLG00020000685	1.66733	7.91233	2.24656	0.000282495	0.0207958	TMTC2	XP_015712983.1 protein O-mannosyl-transferase TMTC2 isoform X3 [Coturnix japonica]
MSTRG.2057	2.197	0.001	-11.1013	0.000287898	0.0209962	--	-
ENSAPLG00020011843	11.722	33.1513	1.49985	0.000288001	0.0209962	Pkn2	XP_038020962.1 serine/threonine-protein kinase N3 isoform X1 [Anas platyrhynchos]
MSTRG.1899	4.951	0.490667	-3.3349	0.000303676	0.0220326	--	XP_035397996.2 taxid=8868 uncharacterized protein LOC118245693 [Cygnus atratus]
MSTRG.4252	1.73733	8.617	2.31031	0.000305615	0.0220672	gag-pro-pol	OPJ83304.1 taxid=372326 endogenous retrovirus group K member 18 Pol protein-like [Patagioenas fasciata monilis]
ENSAPLG00020007544	4.32733	18.9617	2.13154	0.00030718	0.0220745	ST8SIA1	XP_027305792.1 alpha-N-acetylneuraminide alpha-2,8-sialyltransferase isoform X1 [Anas platyrhynchos]
ENSAPLG00020015514	3.26533	0.558667	-2.54717	0.000313606	0.0224295	BEND4	XP_041909797.1 BEN domain-containing protein 4 [Corvus kubaryi]
ENSAPLG00020000786	20.4653	7.60867	-1.42747	0.000317332	0.0225889	Ubash3a	EOA93670.1 Ubiquitin associated and SH3 domain-containing protein A, partial [Anas platyrhynchos]
ENSAPLG00020005662	2.875	10.9183	1.92512	0.000321519	0.0227795	Rrad	XP_027322757.1 GTP-binding protein RAD [Anas platyrhynchos]
ENSAPLG00020000339	45.1187	99.2157	1.13684	0.000335673	0.0236712	UXS1	XP_027301025.1 UDP-glucuronic acid decarboxylase 1 isoform X1 [Anas platyrhynchos]
ENSAPLG00020018022	85.0157	208.802	1.29633	0.000346406	0.0243145	NUAK1	XP_032051673.1 NUAK family SNF1-like kinase 1 [Aythya fuligula]
ENSAPLG00020010101	19.2513	50.6967	1.39693	0.000348825	0.0243709	ZDHHC15	PKU45180.1 palmitoyltransferase zdhhc15 [Limosa lapponica baueri]
ENSAPLG00020006814	6.61333	20.9627	1.66437	0.000353855	0.0246084	SLC1A2	XP_027313585.1 excitatory amino acid transporter 2 isoform X1 [Anas platyrhynchos]
ENSAPLG00020007495	15.8033	35.5083	1.16793	0.000358686	0.0248299	Cmas	XP_027305796.1 N-acylneuraminate cytidylyltransferase [Anas platyrhynchos]
ENSAPLG00020008228	1.173	4.559	1.95851	0.000372733	0.0256846	mas	XP_038031314.1 highly reducing polyketide synthase PKS6-like [Anas platyrhynchos]
MSTRG.2449	1.45867	5.89667	2.01525	0.000375426	0.0257525	--	-
MSTRG.3052	0.287667	2.56067	3.15405	0.000380927	0.0260117	ERV3-1	XP_040434474.1 taxid=148594 endogenous retrovirus group 3 member 1 Env polyprotein-like [Falco naumanni]
ENSAPLG00020014314	4.158	10.4893	1.33496	0.000387458	0.0262203	DLG5	XP_038037648.1 disks large homolog 5 isoform X1 [Anas platyrhynchos]
ENSAPLG00020005063	35.557	98.661	1.47235	0.000389967	0.0262723	CDH2	XP_027307987.1 cadherin-2 [Anas platyrhynchos]
MSTRG.7381	0.134667	2.60167	4.27197	0.000404055	0.0270694	MYO15B	XP_038021485.1 taxid=8839 myosin XVB [Anas platyrhynchos]
ENSAPLG00020007786	76.5493	21.429	-1.83683	0.000405386	0.0270694	--	XP_005029611.1 lymphotactin [Anas platyrhynchos]
ENSAPLG00020006732	23.936	10.9517	-1.12803	0.000408252	0.0270697	LRRC8B	XP_032047807.1 volume-regulated anion channel subunit LRRC8B [Aythya fuligula]
MSTRG.13439	2.019	0.0486667	-5.37456	0.000408979	0.0270697	--	-
ENSAPLG00020009692	45.995	20.093	-1.19478	0.000413217	0.0272035	TENT5A	XP_027310755.1 terminal nucleotidyltransferase 5A [Anas platyrhynchos]
ENSAPLG00020016858	5.13367	14.058	1.45333	0.000414605	0.0272035	ALDH5A1	XP_038030028.1 succinate-semialdehyde dehydrogenase, mitochondrial [Anas platyrhynchos]
ENSAPLG00020012147	3.271	10.5953	1.69563	0.000424188	0.0277117	--	PKU41653.1 rna-directed dna polymerase from mobile element jockey-like [Limosa lapponica baueri]
MSTRG.5160	9.771	3.20533	-1.60803	0.000428417	0.0278674	--	XP_027322798.1 taxid=8839 uncharacterized protein LOC101796494 isoform X2 [Anas platyrhynchos]
ENSAPLG00020017300	15.0383	6.62567	-1.18251	0.00043561	0.0280931	ENTPD1	XP_005013507.1 LOW QUALITY PROTEIN: ectonucleoside triphosphate diphosphohydrolase 1 [Anas platyrhynchos]
ENSAPLG00020014333	43.0077	95.9467	1.15764	0.000445023	0.028578	Ppif	XP_027316007.1 peptidyl-prolyl cis-trans isomerase F, mitochondrial [Anas platyrhynchos]
ENSAPLG00020016902	27.2693	76.113	1.48086	0.000457898	0.0291043	NFATC1	XP_032037455.1 nuclear factor of activated T-cells, cytoplasmic 1 isoform X1 [Aythya fuligula]
ENSAPLG00020003495	12.6937	5.519	-1.20163	0.000458391	0.0291043	Hspa12a	EOB06742.1 Heat shock 70 kDa protein 12B, partial [Anas platyrhynchos]
ENSAPLG00020012504	4.415	0.660333	-2.74115	0.000459003	0.0291043	FOXN4	XP_038043389.1 LOW QUALITY PROTEIN: forkhead box protein N4 [Anas platyrhynchos]
MSTRG.17137	7.18467	0.686333	-3.38794	0.000471544	0.0297744	Gpr152	NWZ30955.1 taxid=75869 GP152 protein [Asarcornis scutulata]
ENSAPLG00020012678	10.6493	23.9723	1.17061	0.000478412	0.0300822	L3MBTL3	XP_027299610.1 lethal(3)malignant brain tumor-like protein 4 isoform X2 [Anas platyrhynchos]
ENSAPLG00020000087	18.9533	7.365	-1.36369	0.000499715	0.0312913	IL1RL1	XP_005013476.1 interleukin-1 receptor-like 1 isoform X3 [Anas platyrhynchos]
ENSAPLG00020017400	93.867	32.7803	-1.51779	0.000506843	0.0316065	TF	XP_005028125.1 serotransferrin [Anas platyrhynchos]
ENSAPLG00020001699	17.8957	38.788	1.116	0.000519305	0.0322503	TIAM1	XP_032053719.1 T-lymphoma invasion and metastasis-inducing protein 1 isoform X2 [Aythya fuligula]
ENSAPLG00020005517	21.4587	43.607	1.023	0.000533376	0.0329885	B4GALT5	XP_032054152.1 beta-1,4-galactosyltransferase 5 [Aythya fuligula]
MSTRG.4364	56.8713	21.73	-1.38801	0.00054113	0.0333314	--	XP_012960389.3 taxid=8839 uncharacterized protein LOC101792197 [Anas platyrhynchos]
ENSAPLG00020003810	6.977	31.277	2.16442	0.000551788	0.0337275	FAM20C	XP_027324739.1 extracellular serine/threonine protein kinase FAM20C [Anas platyrhynchos]
ENSAPLG00020011206	1.36433	5.76433	2.07896	0.00055203	0.0337275	EFEMP1	XP_013046558.1 PREDICTED: EGF-containing fibulin-like extracellular matrix protein 1 [Anser cygnoides domesticus]
ENSAPLG00020008159	12.848	5.12967	-1.32461	0.00055952	0.0340473	ARL2BP	XP_005019979.1 ADP-ribosylation factor-like protein 2-binding protein [Anas platyrhynchos]
ENSAPLG00020010167	3.51167	11.3917	1.69775	0.000563962	0.0341797	PARVA	XP_027317017.1 alpha-parvin isoform X1 [Anas platyrhynchos]
ENSAPLG00020008656	10.3847	25.797	1.31275	0.000566316	0.0341851	NMRK1	XP_013049497.1 PREDICTED: nicotinamide riboside kinase 1 isoform X1 [Anser cygnoides domesticus]
ENSAPLG00020013462	11.6833	35.692	1.61115	0.000568934	0.0342063	Vstm4	EOA99373.1 Uncharacterized protein C10orf72, partial [Anas platyrhynchos]
ENSAPLG00020000949	83.0153	184.446	1.15175	0.000575482	0.0344627	FAM13A	XP_027311607.2 protein FAM13A isoform X1 [Anas platyrhynchos]
ENSAPLG00020002300	0.674333	0.001	-9.39732	0.000578551	0.0345095	TNFAIP8L3	XP_027322713.1 tumor necrosis factor alpha-induced protein 8-like protein 3 [Anas platyrhynchos]
ENSAPLG00020004098	102.443	10.4003	-3.30012	0.000591571	0.0351472	HLA-DRB1	XP_038043922.1 class II histocompatibility antigen, B-L beta chain-like isoform X2 [Anas platyrhynchos]
ENSAPLG00020003542	27.0753	8.83133	-1.61628	0.000594075	0.0351576	H2-DMa	XP_038043821.1 class II histocompatibility antigen, M alpha chain [Anas platyrhynchos]
ENSAPLG00020011417	96.3893	29.618	-1.7024	0.000609315	0.0359187	IL10	AEP93921.1 interleukin-10 isoform 1 [Anas platyrhynchos]
ENSAPLG00020015644	18.591	8.02067	-1.21281	0.000628898	0.0369288	DENND2D	XP_035745643.1 DENN domain-containing protein 2D isoform X1 [Egretta garzetta]
ENSAPLG00020015793	16.3197	36.5037	1.16143	0.000643314	0.0376289	CPNE8	XP_035405172.1 copine-8 isoform X1 [Cygnus atratus]
ENSAPLG00020010190	10.313	24.1953	1.23026	0.000671415	0.0387175	Mctp1	XP_038025714.1 multiple C2 and transmembrane domain-containing protein 1 isoform X5 [Anas platyrhynchos]
ENSAPLG00020001859	77.4333	28.318	-1.45124	0.000671988	0.0387175	IFITM3	NP_001297752.1 interferon-induced transmembrane protein 1 [Anas platyrhynchos]
ENSAPLG00020016707	31.8937	13.651	-1.22426	0.000672188	0.0387175	F8	XP_027321330.2 LOW QUALITY PROTEIN: coagulation factor VIII [Anas platyrhynchos]
ENSAPLG00020003001	8.40833	25.5193	1.6017	0.000695843	0.0399276	Slco2b1	XP_038034508.1 LOW QUALITY PROTEIN: solute carrier organic anion transporter family member 2B1 [Anas platyrhynchos]
ENSAPLG00020011449	2.301	0.448	-2.36069	0.000717962	0.0409919	CR2	EOB07040.1 Complement component receptor 1-like protein, partial [Anas platyrhynchos]
ENSAPLG00020006919	460.558	1239.16	1.42791	0.000719823	0.0409919	FABP4	XP_013028005.1 PREDICTED: fatty acid-binding protein, adipocyte-like [Anser cygnoides domesticus]
ENSAPLG00020013361	20.0113	64.4127	1.68653	0.000736012	0.0417562	PPP1R3C	XP_027316129.1 protein phosphatase 1 regulatory subunit 3C [Anas platyrhynchos]
ENSAPLG00020004625	94.8687	201.896	1.08961	0.000753744	0.0426021	SLC46A3	EOB02867.1 Solute carrier family 46 member 3, partial [Anas platyrhynchos]
ENSAPLG00020016160	18.71	8.881	-1.07502	0.000771135	0.0434224	P2RY2	XP_005027594.4 P2Y purinoceptor 2 [Anas platyrhynchos]
ENSAPLG00020017677	336.798	167.916	-1.00415	0.000778089	0.0436511	IRF3	AID76935.1 interferon regulatory factor 7 [Anas platyrhynchos]
ENSAPLG00020015328	32.4637	81.038	1.31977	0.000838069	0.046669	PLOD2	XP_027324143.2 procollagen-lysine,2-oxoglutarate 5-dioxygenase 2 isoform X1 [Anas platyrhynchos]
ENSAPLG00020004885	0.473	2.03667	2.1063	0.000846618	0.0469717	GLI3	XP_005015002.1 transcriptional activator GLI3 isoform X1 [Anas platyrhynchos]
ENSAPLG00020009459	46.3133	96.818	1.06385	0.000864695	0.0477989	PPFIBP2	XP_035185049.1 liprin-beta-2 isoform X3 [Oxyura jamaicensis]
ENSAPLG00020003595	19.681	6.86933	-1.51856	0.000881575	0.0485542	HLA-DMB	XP_038043864.1 HLA class II histocompatibility antigen, DM beta chain-like isoform X1 [Anas platyrhynchos]
